# Supplementary material for: The origin of the ligand-controlled regioselectivity in Rh-catalyzed [(2 + 2) + 2] carbocyclizations: steric vs. stereoelectronic effects
Source: Royal Society of Chemistry journal article supplement (doi:10.1039/c5sc02307f), 2015-01-01
Supplement: c5sc02307f1.pdf [file c5sc02307f1.pdf]

## Supporting Information

### The Origin of the Ligand-Controlled Regioselectivity in Rh-Catalyzed [(2+2)+2] Carbocyclizations: Steric vs. Stereoelectronic Effects

Douglas W. Crandell,<sup>a</sup> Shivnath Mazumder,<sup>a</sup> P. Andrew Evans<sup>\*,b</sup> and Mu-Hyun Baik<sup>\*,a,c,d</sup>

<sup>a</sup> *Department of Chemistry, Indiana University, 800 E. Kirkwood Ave., Bloomington, Indiana 47405, USA*

<sup>b</sup> *Department of Chemistry, Queen's University, 90 Bader Lane, Kingston, ON K7L 3N6, Canada*

<sup>c</sup> *Department of Chemistry, Korea Advanced Institute of Science & Technology (KAIST), Daejeon, 305-701 (South Korea)*

<sup>d</sup> *Center for Catalytic Hydrocarbon Functionalizations, Institute for Basic Science (IBS), Daejeon, 305-701 (South Korea)*

Email: [andrew.evans@chem.queensu.ca](mailto:andrew.evans@chem.queensu.ca); [mbaik@indiana.edu](mailto:mbaik@indiana.edu)

## Computational Details

All calculations were carried out using DFT<sup>1</sup> as implemented in the Jaguar 8.1 suite of ab initio quantum chemistry programs.<sup>2</sup> Structures were optimized with the B3LYP<sup>3-7</sup> functional including Grimme's D3 dispersion correction<sup>8</sup> and the 6-31G\*\* basis set. The Los Alamos LACVP<sup>9-11</sup> basis that includes relativistic effective core potentials was used to represent Rh. Additional single point calculations were performed on each optimized geometry using Dunning's correlation consistent triple- $\zeta$  basis set cc-pVTZ(-f)<sup>12</sup> that includes a double set of polarization functions to improve the electronic energy. For Rh, we used a modified version of LACVP, designated as LACV3P, in which the exponents were decontracted to match the effective core potential with triple- $\zeta$  quality. Solvation energies were evaluated by a self-consistent reaction field (SCRf)<sup>13-15</sup> approach based on accurate numerical solutions of the Poisson-Boltzmann equation. Solvation calculations were carried out with the 6-31G\*\*/LACVP basis at the optimized gas-phase geometry employing the dielectric constants of  $\epsilon = 7.6$  for THF and 2.284 for benzene. Reactions using PPh<sub>3</sub> as the ligand were performed in benzene and those using xylbinap were done in THF for solubility of the ligand.<sup>16</sup> As is the case for all continuum models, the solvation energies are subject to empirical parameterization of the atomic radii that are used to generate the solute surface. We employed the standard set of optimized radii in Jaguar for H (1.150 Å), C (1.900 Å), P (2.074 Å), O (1.600 Å), and Rh (1.464 Å). Analytical vibrational frequencies within the harmonic approximation were computed with the 6-31G\*\*/LACVP basis to confirm that all intermediates had no imaginary frequencies except for transition states, which possessed one imaginary frequency.

The energy components have been computed with the following protocol. The change in Gibbs free energy in solution phase  $\Delta G(\text{Sol})$  has been calculated as follows:

$$\Delta G(\text{Sol}) = \Delta G(\text{gas}) + \Delta G^{\text{solv}} \quad (1)$$

$$\Delta G(\text{gas}) = \Delta H(\text{gas}) - T\Delta S(\text{gas}) \quad (2)$$

$$\Delta H(\text{gas}) = \Delta E(\text{SCF}) + \Delta ZPE + \Delta C_v T + \Delta PV \quad (3)$$

$$\Delta H(\text{gas}) \approx \Delta E(\text{SCF}) + \Delta ZPE \quad (4)$$

$G(\text{gas})$  is the Gibbs free energy in gas phase;  $G(\text{solv})$  is the free energy of solvation as computed using the continuum solvation model;  $H(\text{gas})$  is the enthalpy in gas phase;  $T$  is the temperature (333 K);  $S(\text{gas})$  is the entropy in gas phase;  $E(\text{SCF})$  is the self-consistent field energy, i.e. "raw" electronic energy as computed from the SCF procedure and  $ZPE$  is the zero point energy. Note that by entropy here we refer specifically to the vibrational/rotational/translational entropy of the solute(s); the entropy of the solvent is incorporated implicitly in the continuum solvation model. As the contributions from the last two terms in equation 3 are negligibly small, this equation can be essentially reduced to equation 4.

To locate transition states, the potential energy surface was first explored approximately using the linear synchronous transit (LST) method,<sup>17</sup> followed by a quadratic synchronous transit (QST)<sup>18</sup> search using the LST geometry as an initial guess.

## References

- (1) Parr, R. G.; Yang, W., *Density Functional Theory of Atoms and Molecules*. Oxford University Press: New York, 1989.
- (2) Jaguar 8.1, Schrödinger, Inc., New York, NY, 2013.
- (3) Slater, J.C., *Quantum Theory of Molecules and Solids, Vol. 4: The Self-Consistent Field for Molecules and Solids*. McGraw-Hill: New York, 1974.

- (4) Vosko, S. H.; Wilk, L.; Nusair, M., *Can. J. Phys.* **1980**, *58*, 1200-1211.
- (5) Becke, A. D., *Phys. Rev. A* **1988**, *38*, 3098-3100.
- (6) Becke, A. D., *J. Chem. Phys.* **1993**, *98*, 5648-5652.
- (7) Lee, C.; Yang, W.; Parr, R. G., *Phys. Rev. B* **1988**, *37*, 785-789.
- (8) Grimme, S.; Antony, J.; Ehrlich, S.; Krieg, H. *J. Chem. Phys.* **2010**, *132*, 154104.
- (9) Hay, P. J.; Wadt, W. R., *J. Chem. Phys.* **1985**, *82*, 270-283.
- (10) Hay, P. J.; Wadt, W. R., *J. Chem. Phys.* **1985**, *82*, 299-310.
- (11) Wadt, W. R.; Hay, P. J., *J. Chem. Phys.* **1985**, *82*, 284-298.
- (12) Dunning, T. H., Jr., *J. Chem. Phys.* **1989**, *90*, 1007-1023.
- (13) Marten, B.; Kim, K.; Cortis, C.; Friesner, R. A.; Murphy, R. B.; Ringnalda, M. N.; Sitkoff, D.; Honig, B., *J. Phys. Chem.* **1996**, *100*, 11775-11788.
- (14) Friedrichs, M.; Zhou, R.; Edinger, S. R.; Friesner, R. A., *J. Phys. Chem. B* **1999**, *103*, 3057-3061.
- (15) Edinger, S. R.; Cortis, C.; Shenkin, P. S.; Friesner, R. A., *J. Phys. Chem. B* **1997**, *101*, 1190-1197.
- (16) Evans, P. A.; Sawyer, J. R.; Inglesby, P. A., *Angew. Chem. Int. Ed.* **2010**, *49*, 5746-5749.
- (17) Halgren, T. A.; Lipscomb, W. N., *Chem. Phys. Lett.* **1977**, *49*, 225-232.
- (18) Peng, C. Y.; Schlegel, B. H. *Isr. J. Chem.* **1993**, *33*, 449-454.

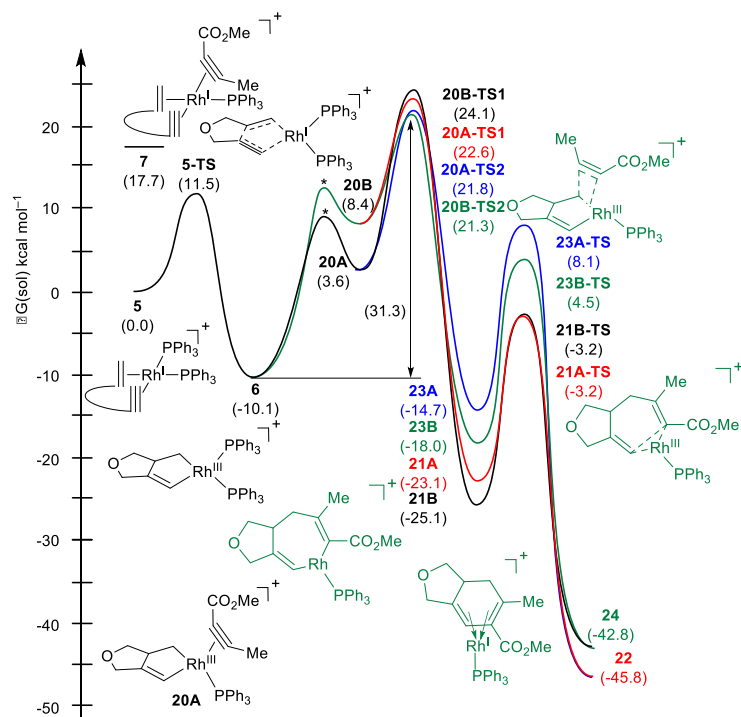

**Figure S1.** Regiodivergent reaction energy profiles for the Rh-catalyzed [2 + 2 + 2] carbocyclization with one PPh<sub>3</sub> ligand bound during alkyne insertion. Transition states indicated by \* were not explicitly located and are shown for illustration only.

The reaction profile for alkyne insertion and subsequent product generation with only one monodentate phosphine ligand bound to Rh is shown in Figure S1. Our calculations indicate that the alkyne bound intermediates **20A** and **20B** with only one phosphine attached are 7.5 and 12.3 kcal mol<sup>-1</sup> higher in energy

than **8C**, respectively. These intermediates are still accessible under the experimental conditions and dissociation of a phosphine ligand provided a sensible hypothesis for the observed change in regioselectivity when a bulky bidentate ligand such as xyl-binap was used. The calculated activation barriers for alkyne insertion with only one phosphine ligand attached, however, are much too high to be accomplished with the lowest barrier height **20B-TS2** being 31.33 kcal mol<sup>-1</sup> uphill with respect to **6**. Moreover, **20B-TS2** is expected to generate the wrong regioisomer compared to experiments with monodentate phosphine. Whereas the lowest energy pathway **20A-TS2** leading to the expected regioisomeric product is only 0.5 kcal mol<sup>-1</sup> higher in energy, the calculated energy differences are too small to explain the experimentally observed product ratios.

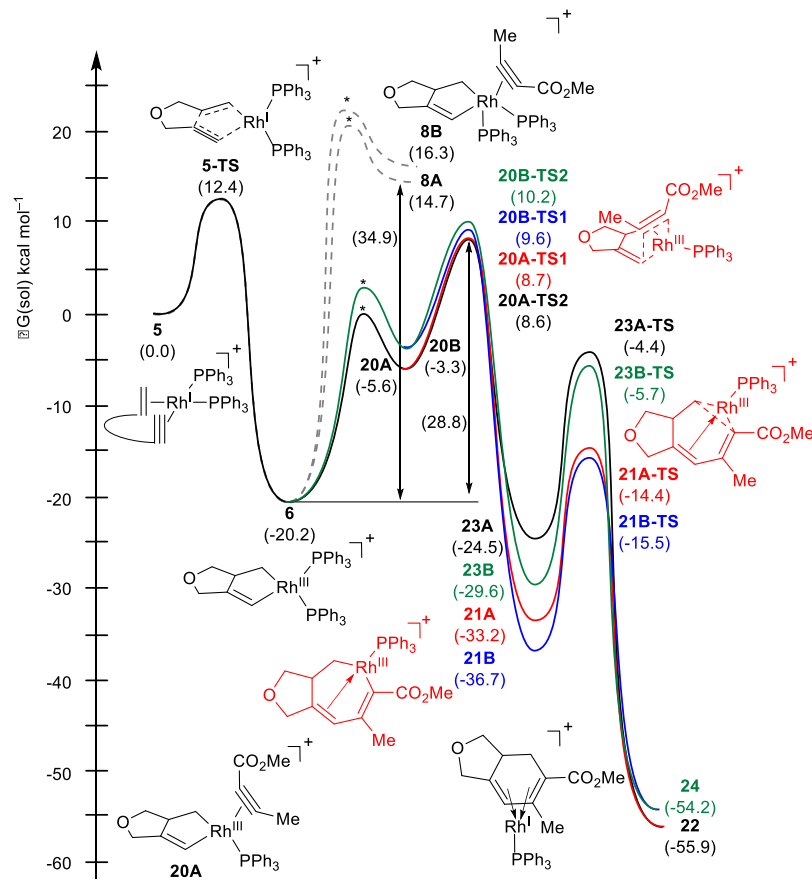

**Figure S2.** Regiodivergent reaction energy profiles for the Rh-catalyzed [2 + 2 + 2] carbocyclization calculated with B3LYP without Grimme's D3 dispersion correction.<sup>[S1]</sup> Transition states indicated by \* were not explicitly located and are shown for illustration only.

When the reaction profile is computed with B3LYP without including Grimme's D3 correction to account for noncovalent interactions, dissociation of a PPh<sub>3</sub> ligand prior to alkyne binding is computed to be favorable by 5.6 kcal mol<sup>-1</sup>. B3LYP and B3LYP-D3 give a less than 1 kcal mol<sup>-1</sup> energy difference (Figure 1 and Figure S1) for the barrier of **5-TS**. Intermediates **8A** and **8B** are substantially higher in energy than intermediates **20A** and **20B** where only one phosphine ligand remains bound to Rh. Surprisingly, insertion into the Rh–alkyl bond through **20A-TS2** is calculated to be essentially isoenergetic with insertion into the Rh–alkenyl bond. Transition states **20A-TS1** and **20A-TS2** both lead to the correct experimentally observed regioisomer with an activation barrier of about 28.8 kcal mol<sup>-1</sup>.

However, when (S)-xyl-binap is used as the ancillary ligand the lowest calculated barrier to alkyne insertion increases to 37.0 kcal mol<sup>-1</sup>. Utilizing dispersion corrections to account for noncovalent actions seems to be critical to properly assess ligand binding energies and accurately predict the correct regioisomeric products.

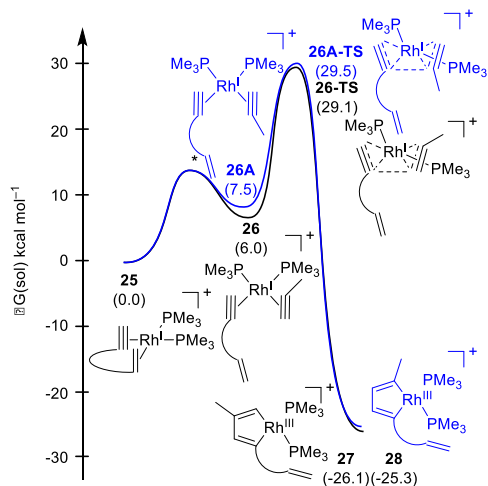

**Figure S3.** Reaction profile for coupling of alkyne of 1,6-ene-yne with methyl substituted alkyne substrate to produce the rhodacyclopentadiene with a dangling tethered alkyne computed with B3LYP.

A small model was used to explore the above pathway in Figure S3, which shows coupling of the alkyne of the 1,6-ene-yne with the methyl-substituted alkyne substrate. In this slightly truncated model the PPh<sub>3</sub> ligand was replaced by PMe<sub>3</sub> and the ester moiety of the alkyne substrate was replaced by hydrogen. Binding an equivalent of alkyne in place of the alkene fragment of the 1,6-ene-yne is uphill by 6.0 kcal mol<sup>-1</sup>. The oxidative addition has a barrier of 29.1 kcal mol<sup>-1</sup> compared to only 12.4 kcal mol<sup>-1</sup> for the coupling of the alkyne and alkene shown in Figure S1. As such, this pathway was not explored any further.

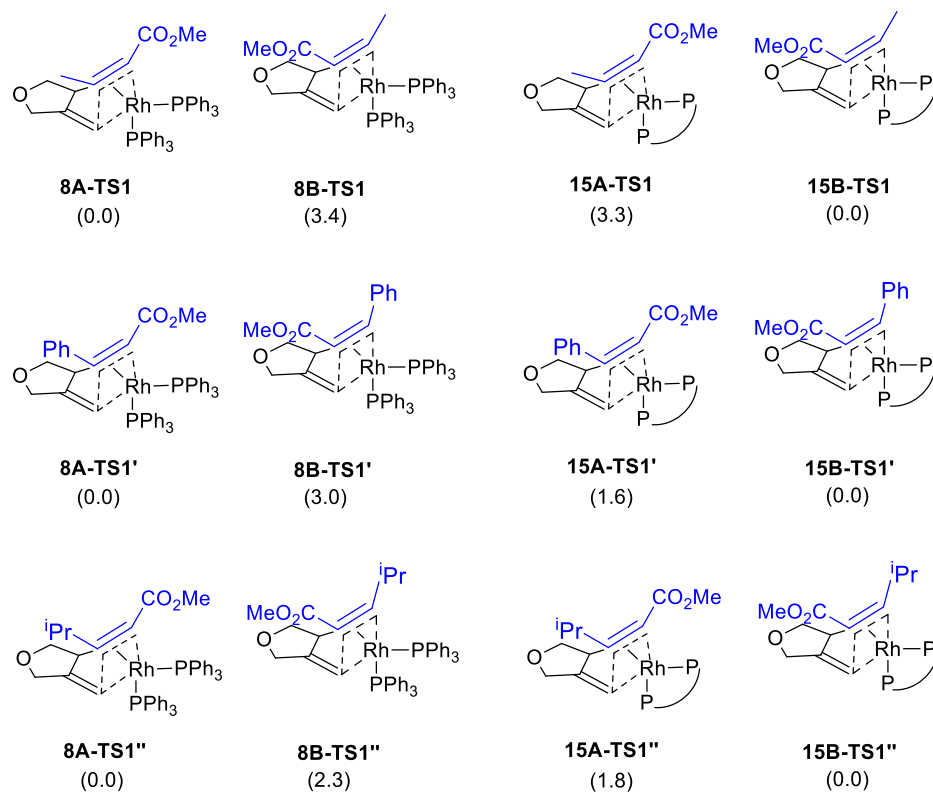

**Figure S4.** Relative energies of the key transition states using different substrates in kcal mol<sup>-1</sup>

Unlike the ester moiety, the aryl and isopropyl fragments are able to rotate away to avoid a steric clash with the phosphine ligands bound to Rh. This flexibility of the aryl and alkyl substituents results in the change in regioselectivity being observed when the ancillary ligand is changed from L = PPh<sub>3</sub> to L = (*S*)-xyl-binap despite an increase in the steric bulk attached to the alkyne substrate.

**Table S1.** Energy components of optimized structures (L = PPh<sub>3</sub>) in kcal/mol

| Structure              | E(SCF)<br>(kcal/mol)<br>cc-pVTZ(-f) | ZPE    | TS<br>(333 K) | G (solv)<br>$\epsilon = 2.284$ | G(sol)<br>$\epsilon = 2.284$ |
|------------------------|-------------------------------------|--------|---------------|--------------------------------|------------------------------|
| <b>1</b>               | -216276.66                          | 62.56  | 31.04         | -3.64                          | -216248.79                   |
| <b>2</b>               | -193696.82                          | 76.94  | 30.63         | -2.65                          | -193653.16                   |
| <b>PPh<sub>3</sub></b> | -650459.05                          | 171.99 | 46.57         | -3.10                          | -650336.73                   |
| <b>3</b>               | -410066.85                          | 146.68 | 40.88         | -4.04                          | -409965.09                   |
| <b>4</b>               | -410067.77                          | 146.76 | 40.62         | -4.08                          | -409965.71                   |
| <b>5</b>               | -1563305.48                         | 426.77 | 88.09         | -21.05                         | -1562987.85                  |
| <b>5-TS</b>            | -1563292.70                         | 426.82 | 89.04         | -21.43                         | -1562976.35                  |
| <b>6</b>               | -1129099.66                         | 317.46 | 75.81         | -24.18                         | -1128882.19                  |
| <b>6-TS</b>            | -1129081.09                         | 316.66 | 75.68         | -23.82                         | -1128863.94                  |
| <b>7</b>               | -1563313.85                         | 427.03 | 89.48         | -21.60                         | -1562997.90                  |
| <b>8A</b>              | -1779603.20                         | 492.68 | 103.61        | -23.13                         | -1779237.26                  |
| <b>8B</b>              | -1779605.27                         | 492.54 | 103.51        | -23.42                         | -1779239.66                  |
| <b>8C</b>              | -1779608.45                         | 492.83 | 101.81        | -23.10                         | -1779240.53                  |
| <b>8C-BPR</b>          | -1779601.74                         | 492.14 | 103.48        | -22.40                         | -1779235.48                  |
| <b>8A-TS1</b>          | -1779599.16                         | 491.94 | 102.74        | -23.73                         | -1779233.69                  |
| <b>8A-TS2</b>          | -1779591.57                         | 491.68 | 103.29        | -22.89                         | -1779226.07                  |
| <b>8B-TS1</b>          | -1779599.67                         | 491.77 | 98.67         | -23.71                         | -1779230.28                  |
| <b>8B-TS2</b>          | -1779589.80                         | 491.59 | 102.15        | -22.93                         | -1779223.29                  |
| <b>9A</b>              | -1779642.21                         | 493.91 | 101.32        | -22.09                         | -1779271.71                  |
| <b>9B</b>              | -1779639.10                         | 494.35 | 103.62        | -23.11                         | -1779271.48                  |
| <b>11A</b>             | -1779638.09                         | 493.36 | 103.75        | -22.72                         | -1779271.19                  |
| <b>11B</b>             | -1779648.42                         | 493.80 | 101.71        | -21.55                         | -1779277.88                  |
| <b>9A-TS</b>           | -1779632.97                         | 493.98 | 100.91        | -21.88                         | -1779261.78                  |
| <b>9B-TS</b>           | -1779633.91                         | 493.83 | 98.00         | -22.76                         | -1779260.84                  |
| <b>11A-TS</b>          | -1779623.37                         | 493.28 | 101.61        | -22.17                         | -1779253.88                  |
| <b>11B-TS</b>          | -1779624.04                         | 493.32 | 103.32        | -21.74                         | -1779255.78                  |
| <b>10</b>              | -1779677.08                         | 495.97 | 97.90         | -21.78                         | -1779300.79                  |
| <b>12</b>              | -1779671.18                         | 496.16 | 98.43         | -21.85                         | -1779295.30                  |
| <b>20A</b>             | -1129112.11                         | 317.86 | 77.61         | -24.45                         | -1128896.31                  |
| <b>20B</b>             | -1129107.71                         | 317.54 | 76.64         | -24.73                         | -1128891.54                  |
| <b>20A-TS1</b>         | -1129092.62                         | 317.11 | 77.28         | -24.50                         | -1128877.29                  |
| <b>20A-TS2</b>         | -1129095.92                         | 317.63 | 76.36         | -23.47                         | -1128878.12                  |
| <b>20B-TS1</b>         | -1129090.99                         | 316.96 | 76.81         | -24.96                         | -1128875.79                  |
| <b>20B-TS2</b>         | -1129095.58                         | 317.62 | 76.60         | -24.07                         | -1128878.63                  |
| <b>21A</b>             | -1129143.66                         | 319.91 | 75.02         | -24.21                         | -1128922.98                  |
| <b>21B</b>             | -1129143.54                         | 319.58 | 76.31         | -24.70                         | -1128924.97                  |
| <b>23A</b>             | -1129131.44                         | 319.84 | 75.47         | -27.53                         | -1128914.59                  |
| <b>23B</b>             | -1129140.38                         | 320.73 | 71.77         | -26.46                         | -1128917.89                  |
| <b>21A-TS</b>          | -1129124.40                         | 319.06 | 73.99         | -23.73                         | -1128903.06                  |
| <b>21B-TS</b>          | -1129124.15                         | 319.15 | 74.02         | -24.08                         | -1128903.09                  |
| <b>23A-TS</b>          | -1129111.30                         | 318.86 | 74.86         | -24.53                         | -1128891.84                  |
| <b>23B-TS</b>          | -1129117.25                         | 319.02 | 73.57         | -23.57                         | -1128895.37                  |
| <b>22</b>              | -1129169.53                         | 321.06 | 74.19         | -23.07                         | -1128945.73                  |
| <b>24</b>              | -1129167.34                         | 321.38 | 73.70         | -23.03                         | -1128942.70                  |
| <b>25</b>              | -841139.81                          | 224.03 | 57.47         | -28.99                         | -841002.24                   |
| <b>26</b>              | -914376.54                          | 258.84 | 69.75         | -26.84                         | -914214.29                   |
| <b>26A</b>             | -914375.27                          | 258.82 | 69.56         | -26.76                         | -914212.76                   |
| <b>26-TS</b>           | -914356.80                          | 258.89 | 66.97         | -26.31                         | -914191.19                   |
| <b>26A-TS</b>          | -914355.81                          | 259.01 | 67.50         | -26.48                         | -914190.78                   |
| <b>27</b>              | -39652.677                          | 261.74 | 66.93         | -28.98                         | -914246.41                   |
| <b>28</b>              | -39652.706                          | 261.88 | 66.47         | -28.13                         | -914245.63                   |

**Table S2.** Energy components of optimized structures (L = Xyl-binap) in kcal/mol

| Structure      | E(SCF)<br>(kcal/mol)<br>cc-pVTZ(-f) | ZPE    | TS<br>(333 K) | G (solv)<br>$\epsilon = 7.6$ | G(sol)<br>$\epsilon = 7.6$ |
|----------------|-------------------------------------|--------|---------------|------------------------------|----------------------------|
| <b>1</b>       | -216276.66                          | 62.56  | 31.04         | -6.52                        | -216251.67                 |
| <b>13</b>      | -1952897.71                         | 609.62 | 121.97        | -31.87                       | -1952441.92                |
| <b>13-TS</b>   | -1952891.25                         | 609.18 | 118.47        | -31.83                       | -1952432.37                |
| <b>14</b>      | -1952900.63                         | 610.76 | 122.98        | -33.24                       | -1952446.10                |
| <b>15A</b>     | -2169194.75                         | 675.28 | 133.53        | -34.13                       | -2168687.14                |
| <b>15B</b>     | -2169193.58                         | 675.64 | 134.06        | -34.24                       | -2168686.23                |
| <b>15A-TS1</b> | -2169184.84                         | 675.70 | 132.53        | -34.34                       | -2168676.01                |
| <b>15A-TS2</b> | -2169178.15                         | 675.17 | 132.50        | -34.44                       | -2168669.92                |
| <b>15B-TS1</b> | -2169185.90                         | 675.03 | 134.75        | -33.72                       | -2168679.34                |
| <b>15B-TS2</b> | -2169176.05                         | 675.13 | 131.30        | -34.57                       | -2168666.79                |
| <b>16A</b>     | -2169239.49                         | 676.82 | 131.82        | -34.18                       | -2168728.67                |
| <b>16B</b>     | -2169234.40                         | 677.18 | 131.62        | -33.88                       | -2168722.71                |
| <b>18A</b>     | -2169223.44                         | 676.78 | 133.35        | -36.18                       | -2168716.20                |
| <b>18B</b>     | -2169229.02                         | 677.23 | 133.90        | -33.40                       | -2168719.09                |
| <b>16A-TS</b>  | -2169221.46                         | 677.21 | 127.20        | -33.89                       | -2168705.34                |
| <b>16B-TS</b>  | -2169221.37                         | 676.95 | 129.61        | -33.60                       | -2168707.63                |
| <b>18A-TS</b>  | -2169202.76                         | 676.09 | 125.91        | -34.18                       | -2168686.76                |
| <b>18B-TS</b>  | -2169206.72                         | 676.91 | 129.97        | -33.86                       | -2168693.64                |
| <b>17</b>      | -2169269.01                         | 679.49 | 131.16        | -32.49                       | -2168753.17                |
| <b>19</b>      | -2169261.31                         | 680.03 | 129.40        | -32.45                       | -2168743.13                |

**Table S3.** Energy components of optimized structures with (R = C<sub>6</sub>H<sub>5</sub> or C<sub>3</sub>H<sub>7</sub>)

| Structure        | E(SCF)<br>(kcal/mol)<br>cc-pVTZ(-f) | ZPE    | -TS<br>(333 K) | G (solv)<br><sup>a</sup> $\epsilon = 2.284$<br><sup>b</sup> $\epsilon = 7.6$ | G(sol)<br><sup>a</sup> $\epsilon = 2.284$<br><sup>b</sup> $\epsilon = 7.6$ |
|------------------|-------------------------------------|--------|----------------|------------------------------------------------------------------------------|----------------------------------------------------------------------------|
| <b>8A-TS1'</b>   | -1899959.79                         | 525.45 | 108.43         | -22.39 <sup>a</sup>                                                          | -1899565.16 <sup>a</sup>                                                   |
| <b>8B-TS1'</b>   | -1899958.06                         | 525.34 | 106.91         | -22.45 <sup>a</sup>                                                          | -1899562.08 <sup>a</sup>                                                   |
| <b>8A-TS1''</b>  | -1828964.31                         | 528.10 | 106.83         | -22.29 <sup>a</sup>                                                          | -1828565.33 <sup>a</sup>                                                   |
| <b>8B-TS1''</b>  | -1828961.57                         | 528.10 | 107.18         | -22.38 <sup>a</sup>                                                          | -1828563.03 <sup>a</sup>                                                   |
| <b>15A-TS1'</b>  | -2289543.80                         | 709.34 | 135.37         | -34.20 <sup>b</sup>                                                          | -2289004.04 <sup>b</sup>                                                   |
| <b>15B-TS1'</b>  | -2289542.65                         | 708.52 | 137.69         | -33.83 <sup>b</sup>                                                          | -2289005.65 <sup>b</sup>                                                   |
| <b>15A-TS1''</b> | -2218547.13                         | 711.58 | 132.56         | -33.65 <sup>b</sup>                                                          | -2218001.92 <sup>b</sup>                                                   |
| <b>15B-TS1''</b> | -2218547.13                         | 711.35 | 134.72         | -33.19 <sup>b</sup>                                                          | -2218003.68 <sup>b</sup>                                                   |



**Table S4.** Cartesian coordinates of optimized geometries

```

=====
1
=====
C -0.552773472 -0.012288480 -1.921401186
C 0.430856116 0.035649868 -1.218804888
C -1.736098131 -0.072345964 -2.768592870
H -1.497617184 0.252834573 -3.787745442
H -2.136657035 -1.090496832 -2.822367756
H -2.523901160 0.585980861 -2.385338982
C 1.602412834 0.170968464 -0.384780926
O 2.105736849 1.228357048 -0.063534959
O 2.071657986 -1.038139219 -0.003814942
C 3.241245503 -0.990838480 0.832825288
H 4.067584645 -0.498150097 0.313040203
H 3.032935782 -0.443463556 1.756254894
H 3.487786217 -2.030395515 1.048909032
=====
2
=====
C -2.524300000 -0.260700000 -1.983900000
C -2.017800000 -0.850000000 -0.900400000
C 3.304800000 -1.179100000 0.101800000
C 2.200100000 -0.775100000 -0.167900000
C 0.877800000 -0.267800000 -0.519500000
O -0.045700000 -0.592300000 0.514100000
C -1.362500000 -0.118400000 0.240600000
H 0.925800000 0.826300000 -0.662200000
H 0.559400000 -0.696000000 -1.482900000
H -1.916900000 -0.288900000 1.170400000
H -1.356600000 0.967200000 0.045800000
H -2.053700000 -1.933800000 -0.795800000
H 4.275600000 -1.545300000 0.342000000
H -2.488500000 0.819000000 -2.111500000
H -3.002200000 -0.828600000 -2.776300000
=====
PPh3
=====
P -0.677200000 -0.026500000 -0.483300000
C 1.111100000 -0.078100000 -0.011000000
C 1.605200000 0.286000000 1.250800000
H 0.921500000 0.631900000 2.019700000
C 2.970900000 0.201400000 1.528400000
H 3.338800000 0.486900000 2.510400000
C 3.860700000 -0.253400000 0.553900000
H 4.922700000 -0.321200000 0.773400000
C 3.380400000 -0.616200000 -0.706300000
H 4.067300000 -0.966800000 -1.471700000
C 2.018200000 -0.519800000 -0.988200000
H 1.652900000 -0.793700000 -1.975200000
C -1.209500000 -1.754100000 -0.087500000
C -0.428300000 -2.677600000 0.623500000
H 0.560700000 -2.395100000 0.970200000
C -0.915700000 -3.957800000 0.894400000
H -0.299200000 -4.662300000 1.446500000
C -2.190400000 -4.331200000 0.465900000
H -2.568700000 -5.326800000 0.680600000
C -2.975700000 -3.420700000 -0.244700000
H -3.967400000 -3.705500000 -0.585600000
C -2.484700000 -2.146500000 -0.526400000
H -3.097900000 -1.446600000 -1.089300000
C -1.404900000 0.909100000 0.938000000
=====
C -1.426300000 2.309800000 0.839900000
H -1.043500000 2.791100000 -0.057100000
C -1.929900000 3.090500000 1.879900000
H -1.933400000 4.173400000 1.790300000
C -2.436900000 2.480700000 3.029400000
H -2.835700000 3.087100000 3.838000000
C -2.433100000 1.088700000 3.133000000
H -2.827800000 0.608200000 4.024300000
C -1.918300000 0.307100000 2.097000000
H -1.913500000 -0.774300000 2.191600000
=====
3
=====
C 0.523000000 0.345600000 0.329300000
C -0.137500000 -0.091100000 1.631300000
C 1.528500000 -1.902400000 1.711200000
C 1.855000000 -1.747000000 0.424500000
C 1.057700000 -0.833200000 -0.474300000
C 2.084800000 -0.549300000 -1.580000000
C 3.001200000 -2.301700000 -0.385800000
O 2.830300000 -1.761600000 -1.701700000
H -0.179400000 0.944000000 -0.260700000
H 1.356100000 1.019100000 0.593900000
H 2.089300000 -2.559300000 2.365300000
H 3.972300000 -1.997900000 0.039800000
H 2.998900000 -3.395000000 -0.466300000
H 1.649600000 -0.328100000 -2.557800000
H 2.737700000 0.291400000 -1.286700000
H 0.218800000 -1.402300000 -0.904800000
C 0.368900000 -1.179000000 2.280800000
C -0.179900000 -1.652600000 3.584300000
C -1.251600000 0.802600000 2.092400000
H -1.571300000 0.600900000 3.110100000
H -0.937200000 1.850600000 1.996500000
H -2.117400000 0.684700000 1.426600000
O -1.173300000 -1.245400000 4.160700000
O 0.576900000 -2.655200000 4.106900000
C 0.117800000 -3.168700000 5.365200000
H 0.821900000 -3.955600000 5.636200000
H 0.108900000 -2.382100000 6.124500000
H -0.894000000 -3.572100000 5.272700000
=====
4
=====
C 0.636769024 0.412923280 0.320490711
C -0.015420928 0.023534131 1.648308440
C 1.671439513 -1.737511400 1.840061931
C 1.980559515 -1.672892423 0.538838325
C 1.176083431 -0.815518832 -0.403263134
C 2.193207281 -0.602918226 -1.533738440
C 3.100857877 -2.300387730 -0.251197720
O 2.936819761 -1.823909501 -1.589625622
H -0.073298685 0.950412384 -0.309102149
H 1.464261463 1.111394609 0.523851631
H 2.233145186 -2.367126213 2.527232854
H 4.082019800 -2.006944834 0.158054130
H 3.061519701 -3.396571720 -0.269797602
H 1.746272111 -0.442071909 -2.518013752
H 2.851300804 0.251752158 -1.300443245
H 0.339454054 -1.421190828 -0.788240792
C 0.517340862 -0.999669355 2.380152772

```

C 0.068316652 -1.456478702 3.744664633  
C -1.146050369 0.848017198 2.135663063  
H -0.742560254 -0.858236106 4.147905490  
H -0.257245130 -2.503592220 3.691533334  
H 0.923399279 -1.435896480 4.432868707  
O -1.291917441 1.975168795 1.383628475  
O -1.891640558 0.616133969 3.073641460  
C -2.366757126 2.834847590 1.785395980  
H -3.324263069 2.308782916 1.733395366  
H -2.350642205 3.673051753 1.087900096  
H -2.220881457 3.185163884 2.811182739

=====

Rh(PPh<sub>3</sub>)<sub>2</sub>

=====

Rh 0.437968062 1.626320937 -1.317854266  
P -1.311719493 2.737530398 -0.277176785  
P 2.009250587 -0.061764046 -1.576659334  
C 3.311028078 -0.122422069 -0.302815129  
C 4.060973461 1.045657841 -0.086420426  
H 3.851899503 1.939915562 -0.669123521  
C 5.069718360 1.064430588 0.874984955  
H 5.650534075 1.969003428 1.033152882  
C 5.327995367 -0.078987635 1.637573045  
H 6.108999436 -0.062460917 2.392150493  
C 4.584120688 -1.242210697 1.427737568  
H 4.786329917 -2.131915737 2.017233909  
C 3.581124020 -1.269423125 0.457024174  
H 3.006650886 -2.177385492 0.299203146  
C 0.830117942 -1.420333704 -1.225957484  
C 0.345965387 -2.264425531 -2.238591502  
H 0.783925307 -2.228302156 -3.231895306  
C -0.695267027 -3.153942134 -1.969165855  
H -1.057564404 -3.808733138 -2.756513068  
C -1.269072455 -3.207714864 -0.695426509  
H -2.078657866 -3.902643958 -0.492289870  
C -0.789814126 -2.371653563 0.318047293  
H -1.226282778 -2.408851890 1.312096128  
C 0.249860119 -1.480799754 0.058092605  
H 0.612348769 -0.833253826 0.850374900  
C 2.822190215 -0.424039241 -3.165529823  
C 2.226065624 0.054732583 -4.343470719  
H 1.305014585 0.632115477 -4.290513984  
C 2.810017543 -0.208346527 -5.582597851  
H 2.344215023 0.164668352 -6.489829919  
C 3.997733149 -0.940743144 -5.652471420  
H 4.456928332 -1.139733270 -6.616090394  
C 4.598645929 -1.411632389 -4.481927478  
H 5.524695007 -1.976465382 -4.535031178  
C 4.016973648 -1.156299101 -3.240903984  
H 4.492445779 -1.519539061 -2.334681319  
C -0.557433084 2.052385071 1.243567702  
C 0.833578329 2.289291253 1.389667723  
H 1.324705690 3.055294642 0.788454645  
C 1.568549184 1.598801176 2.362186615  
H 2.638206467 1.761534835 2.444087637  
C 0.922547228 0.707461374 3.215699777  
H 1.487882664 0.179865867 3.977912725  
C -0.460429149 0.497381834 3.097612108  
H -0.962779253 -0.184917022 3.777770243  
C -1.194250839 1.144736696 2.107265805  
H -2.254981089 0.943912242 1.994257283  
C -1.500300530 4.529233219 -0.057573004  
C -1.479120367 5.350231048 -1.196150063  
H -1.323836626 4.914002533 -2.179766753  
C -1.662443219 6.725940132 -1.066289908  
H -1.649307533 7.358913832 -1.948394692  
C -1.857058677 7.287770878 0.197592445  
H -1.996449676 8.360101239 0.297596179

C -1.870040448 6.475744056 1.334283515  
H -2.020716430 6.914820239 2.315995524  
C -1.693502500 5.098224314 1.211364948  
H -1.707411969 4.467722201 2.095760042  
C -2.971044868 2.011227835 -0.445179652  
C -3.057473163 0.630501411 -0.706996013  
H -2.156315184 0.023860823 -0.762434050  
C -4.302948160 0.030423370 -0.872985595  
H -4.364016255 -1.036268888 -1.067841315  
C -5.466507046 0.800974466 -0.792387561  
H -6.437232634 0.333258676 -0.928548683  
C -5.383514127 2.171517890 -0.539393815  
H -6.288111927 2.769049961 -0.477512266  
C -4.140307491 2.780361941 -0.364395162  
H -4.080603525 3.846447799 -0.167637964

5

=====

Rh 0.458755780 1.145122870 -0.499301300  
P -1.443187018 2.432408831 0.234001335  
P -0.567964706 0.183817828 -2.445966970  
C 2.579237263 0.532615753 -1.176058535  
C 2.038034423 -0.579192749 -0.569071883  
C 1.573859873 2.331068914 1.040989191  
C 1.242202112 1.274786874 1.590003297  
C 1.082525723 0.074241272 2.433312551  
O 1.273775917 -1.132117453 1.702620755  
C 2.401008790 -1.076700247 0.820582065  
H 1.801737712 0.139681054 3.265942134  
H 0.071272445 0.043120217 2.849562610  
H 2.761137834 -2.106945615 0.732115198  
H 3.209922703 -0.476632395 1.257797787  
H 1.548140397 -1.321993337 -1.190272775  
H 1.959725642 3.312658409 0.856661676  
H 3.278942247 1.165197102 -0.637278980  
H 2.554660071 0.648429164 -2.253586431  
C 0.599419659 -0.686350248 -3.577786302  
C 1.377772656 0.082498208 -4.460231922  
H 1.255798890 1.162031688 -4.492814707  
C 2.287978231 -0.532346079 -5.316808548  
H 2.878240348 0.071707301 -5.999393432  
C 2.434603111 -1.922312214 -5.303532881  
H 3.141532747 -2.401179816 -5.974246515  
C 1.664288255 -2.692053777 -4.433356602  
H 1.766061768 -3.773228708 -4.425858529  
C 0.749663983 -2.079815036 -3.573102595  
H 0.145023614 -2.692596511 -2.912197507  
C -1.693518343 -1.173782667 -1.910582940  
C -2.806157435 -1.589314987 -2.656062079  
H -3.079655865 -1.076651341 -3.569892208  
C -3.599781803 -2.646686832 -2.210288443  
H -4.460342592 -2.953413961 -2.797832496  
C -3.297396952 -3.302435624 -1.014793702  
H -3.918632029 -4.123557973 -0.670297225  
C -2.194169183 -2.891526028 -0.263597731  
H -1.952493272 -3.388798008 0.671110991  
C -1.396435222 -1.834079404 -0.704021801  
H -0.560025455 -1.513072851 -0.088725515  
C -1.445746423 1.250509053 -3.655309596  
C -1.607379604 2.619700297 -3.419498487  
H -1.227924723 3.061682141 -2.509073026  
C -2.242543290 3.435649614 -4.357366974  
H -2.359350664 4.495263030 -4.150810985

C -2.719397884 2.892894172 -5.549405827  
H -3.215496855 3.525336776 -6.279310847  
C -2.534184027 1.531854191 -5.811370489  
H -2.877518568 1.104981485 -6.748979626  
C -1.891177690 0.719435893 -4.881148005  
H -1.706924118 -0.322096824 -5.124271618  
C -1.743123682 2.181880311 2.041064311  
C -1.050750260 2.955079032 2.988724506  
H -0.397821810 3.757108921 2.665293703  
C -1.197372888 2.707800123 4.353668548  
H -0.658811063 3.322914167 5.068416743  
C -2.030853072 1.680421989 4.799435696  
H -2.143198849 1.487910847 5.861877611  
C -2.728652991 0.911398931 3.866650312  
H -3.392409200 0.118813808 4.199021763  
C -2.588346937 1.158774161 2.500435707  
H -3.155287989 0.554972054 1.803768927  
C -1.061056654 4.221542068 0.075812731  
C -0.037518366 4.638774470 -0.789141138  
H 0.556603882 3.895479522 -1.315597753  
C 0.227628220 5.997261657 -0.970804022  
H 1.020873427 6.305787139 -1.645336364  
C -0.522445080 6.954200895 -0.285297098  
H -0.315808496 8.010935921 -0.424634911  
C -1.537565755 6.547840632 0.585374083  
H -2.121727001 7.288042899 1.123769562  
C -1.807784321 5.191757767 0.765934305  
H -2.599609999 4.886123304 1.443231420  
C -3.109803235 2.241003904 -0.524238841  
C -3.676764880 0.960026519 -0.605955431  
H -3.138319260 0.096888619 -0.238930397  
C -4.930332682 0.771249974 -1.185219208  
H -5.341676096 -0.231401195 -1.243971004  
C -5.633385470 1.858855779 -1.702008321  
H -6.606509469 1.712652355 -2.161206606  
C -5.076397977 3.136201925 -1.631426454  
H -5.613698111 3.988037936 -2.037749051  
C -3.826104084 3.329831785 -1.046026036  
H -3.408457122 4.329199962 -1.016465618

=====

5-TS

=====

C -0.697287311 0.689102978 0.376242421  
C -0.739879780 -0.187597734 2.164483385  
Rh 1.465772058 0.104814053 1.114809473  
P 2.783380059 -1.765780666 1.452468347  
P 2.971531707 1.561346959 0.183405313  
C 0.277587552 0.568431989 -0.463583538  
C 0.458913283 -0.353427595 2.965544585  
C -1.791736091 0.802155960 2.655014533  
C -1.975575372 1.473522920 0.491036715  
O -2.711696151 1.057120744 1.617019755  
H 0.643286301 -1.352972995 3.347725975  
H 0.687137651 0.451515935 3.665536009  
H 0.486658305 0.828164912 -1.491524589  
H -1.696589456 2.539288330 0.575357289  
H -2.597228836 1.340480782 -0.399259140  
H -2.351808072 0.355274617 3.481357244  
H -1.303413403 1.725270140 3.010753011  
H -1.172746745 -1.122315958 1.808193785  
C 2.315269611 3.193222462 0.718492811

C 2.859747819 3.884021339 1.811074167  
H 3.740229338 3.504635582 2.317788610  
C 2.282617869 5.077944432 2.248568491  
H 2.718570651 5.603384813 3.093239727  
C 1.162746559 5.600221642 1.601242932  
H 0.719379221 6.531024583 1.941512743  
C 0.621764795 4.924436241 0.503126093  
H -0.239433391 5.331980780 -0.018525046  
C 1.187890252 3.728469970 0.068565097  
H 0.760229981 3.216024108 -0.786091247  
C 4.675929465 1.489488338 0.836788065  
C 5.795588425 1.701419141 0.019134974  
H 5.670842992 1.936692808 -1.032130958  
C 7.079341414 1.582656774 0.552392620  
H 7.942431900 1.742360634 -0.087433875  
C 7.257551687 1.247267722 1.896754263  
H 8.259721275 1.140930561 2.301870122  
C 6.145836815 1.048782214 2.718875829  
H 6.272821015 0.776364470 3.762325602  
C 4.862143597 1.175178487 2.191390944  
H 4.000755468 1.004542766 2.826561234  
C 3.165180617 1.659093473 -1.628996002  
C 3.390045456 2.876200699 -2.291249758  
H 3.388543342 3.809549404 -1.736725703  
C 3.617135216 2.887940169 -3.667909155  
H 3.787809270 3.831964661 -4.176934684  
C 3.628370123 1.691549779 -4.388455324  
H 3.808912204 1.705373377 -5.459429596  
C 3.404465005 0.479137870 -3.732527679  
H 3.414553596 -0.454978009 -4.286298002  
C 3.168291229 0.461019393 -2.359258950  
H 2.990421210 -0.481822189 -1.854624228  
C 1.602895379 -3.175836438 1.536088563  
C 0.457703989 -3.148851336 0.719424556  
H 0.277077344 -2.299214930 0.065156746  
C -0.447425634 -4.208766160 0.737360508  
H -1.324182663 -4.179049218 0.096852456  
C -0.226489900 -5.303354350 1.576568326  
H -0.932744991 -6.128101343 1.593167185  
C 0.903260761 -5.333422697 2.394146575  
H 1.078927663 -6.181335093 3.049801292  
C 1.816431943 -4.277602532 2.376235908  
H 2.689597477 -4.318026359 3.018352520  
C 3.858686505 -2.164697924 0.017780904  
C 5.153358503 -1.624945660 -0.066465293  
H 5.558885041 -1.043366380 0.751724847  
C 5.938855454 -1.850183571 -1.195186393  
H 6.935672335 -1.422063040 -1.243565994  
C 5.449775464 -2.620629043 -2.251294399  
H 6.064837545 -2.797101606 -3.128808207  
C 4.171537789 -3.175402246 -2.168168194  
H 3.790739071 -3.792533507 -2.976878807  
C 3.377987933 -2.950068819 -1.042765423  
H 2.390435136 -3.395197712 -0.993700835  
C 3.871179694 -1.983247116 2.912988204  
C 3.594511280 -1.289674338 4.099871747  
H 2.773034636 -0.582979624 4.132021460  
C 4.378813949 -1.488513984 5.235460565  
H 4.153797027 -0.944173615 6.148042082  
C 5.452599661 -2.380563603 5.197361829  
H 6.066873982 -2.532005138 6.080148393

C 5.734554463 -3.077763218 4.021286607  
H 6.566547132 -3.775031922 3.985838477  
C 4.948062334 -2.885398432 2.885894607  
H 5.177119807 -3.436708870 1.979985967

6

Rh 0.695072281 1.854162020 0.752729052  
P -1.556164972 2.571997522 0.799197314  
P 2.951073693 1.560153535 1.359326107  
C 0.414404876 -0.081001225 0.345126117  
C 0.998999379 1.998875717 -1.303222670  
C 0.241536244 -0.334358020 -0.950987360  
C 0.255072786 0.819347973 -1.925927230  
C 0.865699912 0.118489812 -3.157068766  
C 0.224027273 -1.618276165 -1.757506279  
O 0.300432370 -1.191489861 -3.123149766  
C -2.839165467 2.312563999 -0.464972979  
C -3.611341048 3.357059191 -0.993967900  
H -3.444722916 4.380581866 -0.674184289  
C -4.604315774 3.078996600 -1.934415178  
H -5.198387955 3.890697480 -2.344090855  
C -4.836859397 1.764826344 -2.342522049  
H -5.609977792 1.553443998 -3.075288498  
C -4.077337465 0.720376552 -1.808374422  
H -4.257944415 -0.302560486 -2.124949836  
C -3.080407560 0.989503885 -0.873529436  
H -2.482030526 0.179692926 -0.465079652  
C -2.328157136 2.106146052 2.390084421  
C -3.720684815 2.088859375 2.554982118  
H -4.371548903 2.323380405 1.718212276  
C -4.272043234 1.766815028 3.794796964  
H -5.351207096 1.754413789 3.916154652  
C -3.442444922 1.462484701 4.875916263  
H -3.877438119 1.213238198 5.839360488  
C -2.054701423 1.476329664 4.718023159  
H -1.402032663 1.240519872 5.553222852  
C -1.498563017 1.792205498 3.479828649  
H -0.415050241 1.801188840 3.378661318  
C -1.228118817 4.373947727 0.908191042  
C -1.231111644 5.046969886 2.141559375  
H -1.537800425 4.529264866 3.044931561  
C -0.850036861 6.387984495 2.210643158  
H -0.865609534 6.901122053 3.168320370  
C -0.461428712 7.071356683 1.056928472  
H -0.170381599 8.116113910 1.115077012  
C -0.456314684 6.410187091 -0.175223612  
H -0.166037612 6.939742292 -1.078264362  
C -0.829336024 5.069254534 -0.250580648  
H -0.838184280 4.569934983 -1.215577600  
C 3.871344958 0.010603092 1.110106189  
C 4.713096838 -0.525838091 2.097358053  
H 4.817119405 -0.027745284 3.056765421  
C 5.411975705 -1.707612514 1.849923880  
H 6.060436459 -2.118709776 2.617927178  
C 5.278594291 -2.359409377 0.621527193  
H 5.822477575 -3.280259587 0.434121343  
C 4.442647696 -1.827935805 -0.363800797  
H 4.334407425 -2.333163182 -1.319024719  
C 3.737151568 -0.650170607 -0.121540701  
H 3.073294388 -0.251680267 -0.880623247

C 4.035634553 2.940892758 0.867326731  
C 5.433458940 2.847238816 0.933111863  
H 5.903701982 1.918862719 1.243237754  
C 6.220555675 3.947083249 0.595588393  
H 7.302534878 3.870746482 0.647353119  
C 5.621773771 5.142947798 0.192323524  
H 6.239674779 5.997042335 -0.068672735  
C 4.230820313 5.240458420 0.118071513  
H 3.762873419 6.167271404 -0.200678373  
C 3.438547073 4.141714607 0.447402671  
H 2.355588595 4.225157864 0.376965024  
C 2.668984640 1.727929852 3.160760227  
C 2.808547370 2.965570458 3.810569550  
H 3.224368483 3.816079971 3.278967603  
C 2.419410356 3.103165679 5.143122838  
H 2.537448469 4.061194607 5.640937607  
C 1.888102356 2.014495960 5.838446299  
H 1.590200492 2.126087726 6.876907596  
C 1.747566553 0.779479288 5.199220258  
H 1.342743916 -0.072126858 5.738444597  
C 2.128067534 0.635575845 3.865527656  
H 2.019149135 -0.327813597 3.374732995  
H 0.643032832 2.979886159 -1.627014072  
H 2.078122938 1.942561302 -1.464346980  
H 0.515878258 -0.810865438 1.148433610  
H 1.079109907 -2.261320068 -1.494409985  
H -0.693158313 -2.206973556 -1.638403006  
H 0.601567659 0.572231209 -4.115580427  
H 1.966887285 0.085142295 -3.074173439  
H -0.775728319 1.106805756 -2.166395166

7

C 0.063412650 -0.022888497 -0.122268666  
C 0.113152963 -0.208497282 2.389009515  
Rh 1.754471528 0.016279920 1.026311535  
P 4.163703732 0.000656401 1.370941884  
C 1.753397646 2.060552467 0.673660090  
C -0.204119896 1.202376656 -0.583692305  
C 0.413094827 2.420247516 0.072123710  
C 0.395289178 3.409229520 -1.121784500  
C -0.949912980 1.681204539 -1.818253906  
O -0.819644132 3.100034244 -1.792466842  
H 2.010026310 2.564408361 1.604468813  
H 2.572293006 2.162725525 -0.047764656  
H -0.405078261 -0.954636485 -0.433236778  
H -0.504915495 1.253244422 -2.729939039  
H -2.014617696 1.425615081 -1.802336270  
H 0.366910212 4.460319322 -0.828913755  
H 1.271348402 3.238295977 -1.770633370  
H -0.276442747 2.796139030 0.839883781  
C 1.234505778 -0.033333724 2.975293764  
C -1.345774104 -0.407835109 2.449370972  
C 1.966866640 0.116638837 4.244383780  
H -1.875792232 0.485014450 2.104742799  
H -1.661484259 -1.245637156 1.821176144  
H -1.628578506 -0.613828594 3.487191657  
O 2.849306513 0.929136062 4.427546184  
O 1.532527946 -0.768494151 5.143386599  
C 2.229224130 -0.746303827 6.416272557  
H 1.745561236 -1.512552289 7.019693590

H 3.284739797 -0.979120129 6.258548895  
H 2.133591357 0.236605361 6.882055185  
C 4.750316187 -0.980879148 2.790239747  
C 5.825225333 -0.562144851 3.584177713  
H 6.338189883 0.367499786 3.363083676  
C 6.230577800 -1.337399887 4.671144997  
H 7.063930229 -1.007192555 5.283692240  
C 5.570060881 -2.529612709 4.970671816  
H 5.891278506 -3.131481214 5.815452658  
C 4.495219258 -2.950279502 4.182249686  
H 3.978144842 -3.876739750 4.412506123  
C 4.082756920 -2.177461100 3.099129114  
H 3.244170651 -2.509800857 2.492233064  
C 4.708080387 -0.892856455 -0.131761309  
C 4.256687096 -0.425917526 -1.381244179  
H 3.649756004 0.474504897 -1.444604808  
C 4.613570362 -1.090113945 -2.553205653  
H 4.267454759 -0.716510467 -3.512028457  
C 5.419816517 -2.229384168 -2.491893559  
H 5.699220815 -2.747183729 -3.404002503  
C 5.870383643 -2.697038516 -1.255964456  
H 6.504472768 -3.576975983 -1.205873049  
C 5.517081744 -2.036648618 -0.078596650  
H 5.877007001 -2.406273435 0.875747417  
C 5.071192246 1.582504730 1.383992056  
C 4.732242513 2.545991777 2.350426120  
H 3.964858298 2.328708273 3.085480041  
C 5.408790962 3.763565605 2.382591929  
H 5.148872508 4.501225429 3.135908790  
C 6.416391660 4.034699116 1.453720820  
H 6.938810850 4.986242467 1.480828059  
C 6.754829377 3.080248654 0.494436905  
H 7.542202800 3.284970347 -0.224559766  
C 6.088370583 1.855074518 0.456605892  
H 6.364581381 1.117667629 -0.289390538

=====

7-TS

=====

C -0.848558426 0.646185415 0.308229705  
C -0.704548251 -0.192353313 2.071859917  
Rh 1.371231667 0.178985828 0.901713002  
P 2.690622301 -1.641478662 1.440056330  
C 0.105000159 0.778359860 -0.557223166  
C 0.533788291 -0.113495252 2.842797894  
C -1.887326583 0.636631704 2.582899293  
C -2.288390965 1.116549875 0.403189749  
O -2.880291747 0.645278783 1.586700832  
H 0.815718016 -1.025821359 3.359577786  
H 0.692425120 0.797049484 3.420237327  
H 0.218723954 1.184602048 -1.550392724  
H -2.275087593 2.217916723 0.375356748  
H -2.867538764 0.748863719 -0.448945173  
H -2.309671942 0.148515074 3.465319237  
H -1.555347893 1.651729280 2.855489932  
H -1.007318193 -1.208428957 1.817124462  
C 1.524920347 -3.042080416 1.599317677  
C 0.500993933 -3.179609445 0.642620718  
H 0.427722477 -2.477880290 -0.184442785  
C -0.428770105 -4.212138004 0.750595585  
H -1.210516322 -4.313679464 0.003826100  
C -0.356289634 -5.109317408 1.819115877

H -1.083384472 -5.911055955 1.905565060  
C 0.649332926 -4.971441353 2.776242776  
H 0.706112304 -5.665001959 3.609752643  
C 1.588420994 -3.943741310 2.671605500  
H 2.363377279 -3.848657339 3.424359543  
C 3.827168329 -2.011582001 0.058727977  
C 5.048525355 -1.314861646 -0.005850005  
H 5.324101501 -0.603042736 0.766403215  
C 5.913821949 -1.526708098 -1.076801785  
H 6.855315707 -0.987327311 -1.116236699  
C 5.572758722 -2.423857672 -2.093375727  
H 6.249926443 -2.585930909 -2.926448802  
C 4.362740622 -3.117431028 -2.030717948  
H 4.097871981 -3.825216381 -2.810456036  
C 3.489815731 -2.914697259 -0.960161804  
H 2.561705639 -3.474057625 -0.918173111  
C 3.763086813 -1.656466353 2.917990291  
C 3.614992591 -0.710575311 3.941248857  
H 2.894549810 0.090493394 3.838758373  
C 4.418826932 -0.779082704 5.080480310  
H 4.294491436 -0.043595879 5.869862538  
C 5.377052474 -1.785714247 5.206186769  
H 6.000816181 -1.836625376 6.093314092  
C 5.538155490 -2.724283721 4.183078809  
H 6.287763132 -3.504685314 4.271422354  
C 4.740518535 -2.661230463 3.042415600  
H 4.879254168 -3.389307026 2.248819133  
C 2.944953275 1.020099792 -0.445721030  
C 3.146641611 1.330652048 0.755128881  
C 3.187512697 0.933720499 -1.889362286  
C 4.032408030 1.844033185 1.803325284  
H 2.360033552 1.355013925 -2.468143857  
H 4.103342081 1.478494798 -2.141580664  
H 3.312181301 -0.114151957 -2.180234687  
O 5.241413469 1.805098458 1.708672907  
O 3.356460528 2.327744386 2.856192476  
C 4.184628052 2.833271760 3.930343206  
H 3.488623956 3.183511903 4.691334873  
H 4.821164548 2.033782479 4.316984968  
H 4.811401306 3.651788920 3.571983841

=====

8A

=====

C -0.307094287 -0.294555182 0.423649360  
C 2.266658521 0.180227641 -0.176093509  
Rh 1.395076806 -1.289338945 1.063221222  
P 3.372376282 -2.673400098 2.040885212  
P 0.888251499 -2.684915407 -0.818712753  
C -0.079881174 0.904413140 -0.109538374  
C 1.344121197 1.383217856 -0.215752892  
C 1.255285658 2.186038143 -1.534121273  
C -0.945536628 1.877411479 -0.883041552  
O -0.024988862 2.810601788 -1.463141319  
H 3.240208160 0.373666325 0.266364333  
H 2.357762288 -0.284433525 -1.156979739  
H -1.292246779 -0.756556549 0.488649686  
H -1.514814339 1.348034713 -1.662104333  
H -1.648809694 2.441362850 -0.259637965  
H 2.006922825 2.972367216 -1.638142839  
H 1.322458365 1.502881761 -2.397282154  
H 1.570940270 2.074861176 0.607147437

C 1.846146164 0.186701371 2.729212316  
C 0.635818416 -0.055147600 2.850531856  
C -0.724824767 -0.140906208 3.391103079  
C 3.070289539 0.828642112 3.209083307  
H -1.145166214 -1.144107718 3.273308807  
H -0.687723386 0.109661160 4.456743825  
H -1.383064329 0.565894680 2.880226224  
O 4.145886404 0.528994240 2.459888589  
O 3.086427224 1.544445046 4.183874829  
C 5.400714977 1.052658861 2.950630660  
H 6.156171854 0.672962617 2.264284784  
H 5.381445006 2.144371664 2.951150612  
H 5.581768263 0.687384333 3.963403414  
C 0.150448527 -1.826500558 -2.267312122  
C 0.971535632 -1.381714991 -3.314918882  
H 2.031808965 -1.610185736 -3.318078941  
C 0.432995852 -0.655751888 -4.379344127  
H 1.084261039 -0.321469137 -5.181210205  
C -0.932161379 -0.374093564 -4.421175701  
H -1.350215470 0.185403742 -5.251796767  
C -1.759699353 -0.827359173 -3.390678726  
H -2.826279211 -0.626000931 -3.419624772  
C -1.224108392 -1.539067966 -2.318173276  
H -1.883124449 -1.881319924 -1.528385673  
C 2.259704016 -3.620905327 -1.592180520  
C 3.520391673 -3.014896484 -1.675125737  
H 3.677786538 -2.030650100 -1.255054353  
C 4.594284084 -3.685558301 -2.260267951  
H 5.570384140 -3.211839038 -2.286437458  
C 4.412949116 -4.969287505 -2.775554743  
H 5.247888975 -5.499998412 -3.222923496  
C 3.154370369 -5.573865331 -2.711430984  
H 3.010599068 -6.573126741 -3.111570257  
C 2.080398454 -4.905906558 -2.125135085  
H 1.117451950 -5.399481594 -2.056383662  
C -0.350227809 -3.922098400 -0.286670278  
C -0.410703068 -4.270714518 1.071316695  
H 0.271010737 -3.818275879 1.784285249  
C -1.312479603 -5.235363640 1.518414033  
H -1.333843845 -5.501662639 2.570432230  
C -2.168734915 -5.864252748 0.613255650  
H -2.871971987 -6.615415884 0.959083344  
C -2.116251475 -5.525184453 -0.741273014  
H -2.778651268 -6.011857010 -1.450599665  
C -1.214912235 -4.560894725 -1.191870973  
H -1.190014176 -4.301618363 -2.245385135  
C 3.749897909 -2.249504517 3.796131253  
C 2.688062579 -2.034949602 4.691402376  
C 2.929921769 -1.745770958 6.032975920  
H 2.095281476 -1.583189095 6.707992494  
C 4.240556452 -1.654217959 6.502202208  
H 4.431570018 -1.420724111 7.544966427  
C 5.303526847 -1.862141401 5.622762463  
H 6.326859010 -1.796813796 5.980561271  
C 5.063200803 -2.158902035 4.280469120  
H 5.904090442 -2.317308053 3.615643740  
C 2.892340386 -4.456614786 2.157259193  
C 2.270962039 -4.984534048 3.300643571  
H 2.141038959 -4.377801402 4.188570932  
C 1.829832728 -6.308320692 3.321921734  
H 1.359419960 -6.699748116 4.219292539

C 2.005271887 -7.129167974 2.208018333  
H 1.662074681 -8.159088510 2.228299157  
C 2.639624109 -6.620755963 1.074456403  
H 2.798000231 -7.249782911 0.203718321  
C 3.081360736 -5.299597448 1.049098827  
H 3.596726388 -4.936848803 0.170802012  
C 5.039737875 -2.721500588 1.263193688  
C 5.509660530 -1.589333375 0.582204696  
H 4.875217799 -0.718439589 0.488809239  
C 6.788589881 -1.574248123 0.026192669  
H 7.136351833 -0.691784995 -0.503002859  
C 7.617603001 -2.691433665 0.148033420  
H 8.613099830 -2.682161884 -0.285698345  
C 7.164171433 -3.818436958 0.835379552  
H 7.806177492 -4.687725365 0.941630477  
C 5.885853738 -3.833990854 1.393270750  
H 5.550048172 -4.715634025 1.927984119  
H 1.662810767 -2.091084295 4.341408685

=====

8B

=====

C -0.164537500 -0.079246955 0.551724655  
C 2.377972114 0.073180807 -0.267540025  
Rh 1.446435759 -1.222730902 1.100617668  
P 3.307149979 -2.772894488 2.139032387  
P 0.810768503 -2.601833848 -0.670521062  
C 0.142638052 1.076578550 -0.031778370  
C 1.599063844 1.382662274 -0.259059583  
C 1.502249750 2.187200634 -1.574542672  
C -0.663490761 2.141293055 -0.743859961  
O 0.310033773 2.954474483 -1.415923017  
H 3.419660068 0.161617136 0.046297823  
H 2.343953899 -0.381084022 -1.257769136  
H -1.179258506 -0.442318576 0.717207581  
H -1.356261372 1.679095985 -1.464820967  
H -1.239202969 2.790084932 -0.073802932  
H 2.327727235 2.883317531 -1.747299369  
H 1.425811601 1.496761611 -2.432331500  
H 1.957688603 2.052229684 0.536527778  
C 1.115348164 0.122826512 2.998166232  
C 2.255195367 0.549862552 2.866119745  
C 3.608499505 1.085013295 2.855961735  
C -0.185616013 -0.184224053 3.579115336  
H 3.890938866 1.454033059 1.865715428  
H 3.673323116 1.920512255 3.562141153  
H 4.318316043 0.311297828 3.168200866  
O -0.537931348 -1.456531241 3.266868707  
O -0.837660009 0.568655822 4.258103422  
C -1.835395718 -1.881944062 3.745998479  
H -1.971558673 -2.886074696 3.347024616  
H -1.851883552 -1.884335918 4.838446611  
H -2.610134921 -1.206704937 3.375267731  
C 0.008490430 -1.765231847 -2.093976835  
C 0.761333424 -1.420985513 -3.226975806  
H 1.802194098 -1.718495100 -3.305758165  
C 0.178353282 -0.701405814 -4.272782738  
H 0.775998657 -0.443705066 -5.142384382  
C -1.163423222 -0.326316957 -4.207955801  
H -1.615870396 0.230436434 -5.022906136  
C -1.924706673 -0.681107942 -3.090295462  
H -2.974061329 -0.405718589 -3.035715290

C -1.344336788 -1.388267897 -2.038729069  
H -1.950609242 -1.655908859 -1.179982832  
C 2.162123648 -3.545612622 -1.479787439  
C 3.460405577 -3.017292399 -1.508209620  
H 3.678313599 -2.075367011 -1.024122096  
C 4.500744708 -3.721300455 -2.117288551  
H 5.504695093 -3.307595555 -2.099619946  
C 4.252067882 -4.958382711 -2.714041539  
H 5.060547727 -5.513539951 -3.180462993  
C 2.955146471 -5.481822055 -2.706805720  
H 2.753648704 -6.443528739 -3.170211925  
C 1.914822603 -4.781846068 -2.097050383  
H 0.921626475 -5.217738478 -2.074188996  
C -0.409621437 -3.829386517 -0.069665228  
C -0.405957626 -4.195880709 1.285039974  
H 0.293037061 -3.740119752 1.975823189  
C -1.289633857 -5.164996909 1.759861574  
H -1.254671298 -5.452108211 2.806904382  
C -2.198381976 -5.772762065 0.891510773  
H -2.888218286 -6.525692401 1.261236539  
C -2.216654412 -5.406952699 -0.456685448  
H -2.923178099 -5.871618933 -1.138334575  
C -1.329793295 -4.443472399 -0.937397691  
H -1.362754885 -4.163179025 -1.985682790  
C 3.601189608 -2.329037079 3.902753048  
C 2.491245880 -2.134716008 4.742942792  
C 2.663664447 -1.811438395 6.087145072  
H 1.794669720 -1.668192038 6.723356664  
C 3.949953492 -1.661863120 6.610310536  
H 4.085958113 -1.402413312 7.656158877  
C 5.058554878 -1.849391701 5.784766306  
H 6.061832476 -1.740793919 6.186959552  
C 4.889157616 -2.185025361 4.439873838  
H 5.762835052 -2.336432505 3.814721072  
C 2.841313933 -4.558935875 2.240927899  
C 2.291027405 -5.118588091 3.405211654  
H 2.205937220 -4.532806522 4.313038275  
C 1.852983718 -6.443805112 3.417655190  
H 1.434346009 -6.858548383 4.330621852  
C 1.962201930 -7.235092902 2.274341477  
H 1.617901598 -8.265250442 2.286510665  
C 2.531764033 -6.696261223 1.120220018  
H 2.641213147 -7.302493274 0.225590268  
C 2.970842118 -5.374316310 1.103460702  
H 3.435583667 -4.989344437 0.206063050  
C 5.010015884 -2.790626173 1.445307331  
C 5.530799197 -1.593122057 0.932679441  
H 4.918812808 -0.698596063 0.926654922  
C 6.829425305 -1.537206002 0.428354107  
H 7.216722956 -0.602742460 0.032167101  
C 7.627639542 -2.683454221 0.431303838  
H 8.638024267 -2.645219909 0.034374228  
C 7.125140171 -3.875899973 0.955522881  
H 7.744756552 -4.768035417 0.971676118  
C 5.827625447 -3.930336837 1.465570391  
H 5.454901637 -4.862796543 1.875369357  
H 1.486938810 -2.242768734 4.345402699

=====

8C

=====

Rh 0.620794352 1.646925867 0.826495015

P -1.709416799 2.247570804 0.485196965  
P 2.974654912 1.180373340 1.168571290  
C 0.328381924 -0.158578702 0.019907924  
C 1.104599490 2.126458609 -1.166975104  
C 0.312427800 -0.213819532 -1.310314832  
C 0.487521289 1.065166511 -2.081753884  
C 1.305692587 0.530987560 -3.273943627  
C 0.330805460 -1.351378776 -2.303637748  
O 0.722741390 -0.748469862 -3.545299267  
H 0.763214124 3.143817045 -1.381049374  
H 2.192158014 2.109277413 -1.261645253  
H 0.268433378 -1.016599675 0.693266629  
H 1.044132548 -2.134083800 -2.004694922  
H -0.654117014 -1.814384487 -2.448741057  
H 1.225100847 1.129362406 -4.185792046  
H 2.369146480 0.436060498 -2.997747081  
H -0.490251047 1.391187343 -2.458433531  
C 0.898906608 4.451121611 2.486269991  
C 0.622036543 3.384572953 3.001134170  
C 1.209549208 5.736105278 1.887232200  
C 0.319171449 2.280176830 3.888912470  
H 0.946773219 5.744626758 0.825276635  
H 0.637038970 6.526137632 2.382457304  
H 2.278138618 5.950376586 1.986142769  
O 0.122823497 2.365717426 5.074998239  
O 0.313570897 1.103175118 3.198986129  
C 0.232875904 -0.096611451 4.012413095  
H 0.322753481 -0.925417291 3.312109740  
H 1.059678436 -0.105319007 4.723281607  
H -0.724203855 -0.122797502 4.534461193  
C -1.813778668 4.079202044 0.491765861  
C -2.206246284 4.801705384 1.629902913  
H -2.486562055 4.281989687 2.539177617  
C -2.240555923 6.196392551 1.607668820  
H -2.562713928 6.735659499 2.493991312  
C -1.867505763 6.893590189 0.457975954  
H -1.906850986 7.978666859 0.439834744  
C -1.436436291 6.187384979 -0.667170026  
H -1.134523182 6.719450280 -1.564636841  
C -1.397509202 4.792987302 -0.647497187  
H -1.066028759 4.263091883 -1.534352949  
C -2.657298944 1.686167539 -0.995104878  
C -3.295990162 2.550806887 -1.895399891  
H -3.249732203 3.624720983 -1.763697373  
C -4.027426708 2.038131592 -2.968634576  
H -4.514141847 2.722861397 -3.657080734  
C -4.140746168 0.661357423 -3.151120005  
H -4.705429473 0.266256695 -3.990240900  
C -3.540227595 -0.207170324 -2.236919555  
H -3.643546723 -1.281725214 -2.356442558  
C -2.812031489 0.298403143 -1.163801260  
H -2.363806691 -0.388721956 -0.457051673  
C -2.835570843 1.611061715 1.789834885  
C -4.058418649 2.228338489 2.098523413  
H -4.334863999 3.166624510 1.628944129  
C -4.938420055 1.629359994 2.998066934  
H -5.877078748 2.120513630 3.237154023  
C -4.625668172 0.397376145 3.576580459  
H -5.316668286 -0.067705988 4.273247593  
C -3.432964007 -0.243089823 3.240182951  
H -3.197196273 -1.215665369 3.663300225

C -2.543608178 0.361011832 2.351906946  
H -1.630568880 -0.149557991 2.071724336  
C 4.036380133 2.679925339 1.101968681  
C 5.329242842 2.645422794 1.652510008  
H 5.681960526 1.750318164 2.155293476  
C 6.164351914 3.756481874 1.561276889  
H 7.159805076 3.717491465 1.993757181  
C 5.724670628 4.913300482 0.913278314  
H 6.378803445 5.777052555 0.839533705  
C 4.444294964 4.955147232 0.360871940  
H 4.098165811 5.851479318 -0.146170200  
C 3.602184422 3.845671214 0.457405988  
H 2.606499601 3.894262205 0.033514475  
C 3.390677937 0.494787795 2.825540431  
C 3.340199775 1.374068334 3.922456955  
H 3.130848436 2.427981068 3.765690521  
C 3.574735758 0.912594950 5.215379469  
H 3.524593617 1.605995845 6.049493104  
C 3.868311077 -0.436497360 5.436210113  
H 4.050948914 -0.798148273 6.443705384  
C 3.942065228 -1.311003921 4.352621509  
H 4.192927717 -2.356045438 4.510600367  
C 3.705967907 -0.851446556 3.054860331  
H 3.800320688 -1.545752195 2.229101654  
C 3.727417030 0.052197575 -0.065997711  
C 4.696829462 0.512147048 -0.969767693  
H 5.058123773 1.533057040 -0.913620966  
C 5.210685414 -0.340156427 -1.949750396  
H 5.958742947 0.032348686 -2.643312596  
C 4.771718686 -1.660535307 -2.036503598  
H 5.174480773 -2.321171187 -2.798276161  
C 3.807712349 -2.128128038 -1.140885643  
H 3.455816468 -3.153674154 -1.203402429  
C 3.277010551 -1.275665387 -0.175921080  
H 2.501744341 -1.648072536 0.482051445

=====

8C-BPR

=====

C 1.074541205 0.482752594 0.231309233  
C 2.752070957 -1.311007715 -0.971195453  
Rh 1.653741129 -1.354926600 0.841250194  
P 3.782292864 -2.107693838 2.067269215  
P -0.206385253 -2.067027418 -0.289044139  
C 1.836145397 0.991627026 -0.733084145  
C 2.947916161 0.166354985 -1.316170075  
C 2.886829321 0.643411296 -2.780922326  
C 1.701174733 2.240837898 -1.583168059  
O 2.620283191 2.044399521 -2.664147793  
H 3.697252539 -1.833847826 -0.843843355  
H 2.184569305 -1.827442731 -1.744761286  
H 0.206935283 0.970414684 0.665698277  
H 0.668655345 2.336093135 -1.954919212  
H 1.972161753 3.170463591 -1.069907213  
H 3.821956590 0.527818258 -3.334918704  
H 2.079176074 0.124093818 -3.319813095  
H 3.904199332 0.517938868 -0.901603460  
C 0.630552551 -0.822934010 3.180176116  
C 0.224937962 -1.967366716 3.282993330  
C -0.263761823 -3.321590598 3.481913144  
C 0.884259091 0.595884108 3.377060385  
H -0.876193187 -3.648210675 2.635661456

H 0.566356783 -4.019740707 3.630393042  
H -0.892057739 -3.342483237 4.379995893  
O 2.089436481 0.787075241 3.930185446  
O 0.098669372 1.471785199 3.078611637  
C 2.466854767 2.164680082 4.159500866  
H 3.486539128 2.119350552 4.537150230  
H 2.427364843 2.723343255 3.221640967  
H 1.792141227 2.623274894 4.886670718  
C -0.530714899 -1.403601815 -1.966290763  
C 0.076592272 -1.940420236 -3.113342346  
C -1.326294359 -0.252580135 -2.094745021  
C -0.113936907 -1.341531742 -4.359942993  
C -1.504238920 0.347411613 -3.340529939  
C -0.896951979 -0.192412063 -4.476914875  
H 0.693550572 -2.830510106 -3.045628424  
H -1.813277694 0.175027934 -1.224374876  
H 0.357502991 -1.773126143 -5.237980477  
H -2.122192229 1.236621338 -3.422764558  
H -1.036616660 0.276873872 -5.445855766  
C -1.811512757 -1.860837451 0.584140676  
C -2.829038408 -2.814667930 0.413078802  
C -2.063504689 -0.724119993 1.368147240  
C -4.073729382 -2.628942542 1.011845034  
C -3.312228877 -0.543357131 1.962087311  
C -4.318831504 -1.492722189 1.784548510  
H -2.655477170 -3.704856159 -0.181341834  
H -1.296674376 0.016262589 1.546472029  
H -4.852040164 -3.373339618 0.872204026  
H -3.488552224 0.340215621 2.567862958  
H -5.290163861 -1.350616452 2.248959850  
C 0.017174985 -3.883566320 -0.470353471  
C 0.801398085 -4.561339110 0.479065127  
C -0.594078625 -4.629634253 -1.492466693  
C 0.986217825 -5.941346340 0.402704004  
C -0.408889507 -6.011269352 -1.565826571  
C 0.384061864 -6.671211957 -0.623671073  
H 1.278171540 -4.013275950 1.286121841  
H -1.212075048 -4.135608515 -2.235452059  
H 1.601894630 -6.440206161 1.145824378  
H -0.887007079 -6.572120437 -2.363635792  
H 0.526854022 -7.745636372 -0.687882240  
C 3.422142062 -3.143886706 3.541187097  
C 3.005253045 -2.539113337 4.739768183  
C 3.449669714 -4.546116873 3.458984317  
C 2.631710357 -3.323895433 5.830435264  
C 3.067227496 -5.325802617 4.552981672  
C 2.654970271 -4.718640323 5.741028180  
H 2.969889019 -1.457192006 4.818402398  
H 3.787350543 -5.034156970 2.549785972  
H 2.319917793 -2.843040319 6.753355266  
H 3.103887840 -6.409038729 4.477934984  
H 2.362828370 -5.325938549 6.592504788  
C 4.935109473 -3.143621290 1.084317615  
C 6.324041273 -3.110645159 1.274738401  
C 4.395761214 -4.039140157 0.145312686  
C 7.152594365 -3.964831099 0.546558983  
C 5.226114280 -4.899508797 -0.571636361  
C 6.607191615 -4.864247956 -0.371306834  
H 6.763908482 -2.419084549 1.985668223  
H 3.325256019 -4.065343962 -0.030462762  
H 8.227294474 -3.928456107 0.699514886



H 4.793987995 -5.589927632 -1.290588184  
H 7.256845472 -5.528558796 -0.933838685  
C 4.777692464 -0.703143435 2.678102934  
C 5.656346289 -0.823578472 3.766346503  
C 4.685991468 0.520616627 1.999237320  
C 6.441554268 0.261720478 4.155556006  
C 5.483297542 1.598474883 2.381770924  
C 6.362891398 1.470232624 3.459051303  
H 5.722854727 -1.759492184 4.312824253  
H 3.978373230 0.638747017 1.185208570  
H 7.118660586 0.161436061 4.999040470  
H 5.409715034 2.540200570 1.845474956  
H 6.981778894 2.310732685 3.759843007

=====  
8A-TS1  
=====

C -0.037408423 0.043581524 -0.189636593  
C -0.401405142 0.314589986 1.989307477  
C 2.608104503 -0.170979936 0.546676629  
C 0.613070864 -0.016179601 2.668546959  
Rh 0.945723220 -1.358791965 1.045344166  
P 1.857811392 -3.095734182 2.632505410  
P 1.080875372 -2.732825941 -0.918300401  
C 0.768445634 1.037775633 -0.576178830  
C 2.121339141 1.182243806 0.066129797  
C 2.899963908 1.856866502 -1.089391622  
C 0.685845740 2.025694510 -1.719060087  
O 1.940948749 2.713855204 -1.702014840  
H 3.179754292 -0.110593245 1.468875810  
H 3.145710949 -0.724026317 -0.223745584  
H -0.999664966 -0.157017577 -0.657469218  
H 0.529015558 1.502614486 -2.673303300  
H -0.112972236 2.766795012 -1.593752624  
H 3.743183150 2.470417918 -0.763115414  
H 3.264281031 1.091636802 -1.795771386  
H 2.050556915 1.885396177 0.907534479  
C -1.758361652 0.875052929 1.869779791  
H -2.458466998 0.146098708 1.448475431  
H -2.091043762 1.141419239 2.880070817  
H -1.771449073 1.765094164 1.235476323  
C 1.237755733 0.233108804 3.975774220  
O 0.661017886 0.727492243 4.918560116  
O 2.533039409 -0.140661647 3.978919973  
C 3.224132961 0.034821000 5.234538987  
H 3.282853617 1.095439682 5.490273000  
H 2.697790204 -0.502208611 6.026455625  
H 4.217009543 -0.385213578 5.075600935  
C 0.746639255 -1.859378756 -2.504831616  
C 1.812265153 -1.222464688 -3.162458751  
C -0.546242282 -1.740176273 -3.032238381  
C 1.589887547 -0.491421515 -4.328285356  
C -0.765602953 -1.002495779 -4.198339707  
C 0.298445251 -0.376297348 -4.849976336  
H 2.823646278 -1.314472295 -2.777775943  
H -1.383634694 -2.233044703 -2.548151967  
H 2.425683902 -0.010621062 -4.828153971  
H -1.771407767 -0.926764966 -4.601711730  
H 0.124854605 0.191755703 -5.758826968  
C 2.652651187 -3.581408108 -1.315781474  
C 2.784509868 -4.345494010 -2.489016144  
C 3.771476678 -3.407484793 -0.492537492

C 3.994649221 -4.965778929 -2.791515510  
C 4.987684202 -4.017811661 -0.802331481  
C 5.097538597 -4.806914964 -1.947008950  
H 1.947409863 -4.441552467 -3.173860980  
H 3.697386547 -2.806800006 0.403227380  
H 4.081646223 -5.564134475 -3.693695597  
H 5.840339499 -3.875555928 -0.144359632  
H 6.040821953 -5.287227006 -2.190411775  
C -0.262066311 -3.972699816 -0.782133710  
C -1.468055566 -3.526573065 -0.210302638  
C -0.169958675 -5.298238459 -1.222499301  
C -2.565547823 -4.379291578 -0.107528514  
C -1.270116717 -6.149262508 -1.116471473  
C -2.469052982 -5.693375248 -0.568123398  
H -1.554356230 -2.501327214 0.145396937  
H 0.760164926 -5.680683086 -1.624941982  
H -3.492192966 -4.019185760 0.330422486  
H -1.184530741 -7.177098917 -1.456444200  
H -3.321812068 -6.361385587 -0.490425653  
C 1.399346949 -4.833095451 2.164026220  
C 0.156253062 -5.374326475 2.526351607  
C 2.295590693 -5.637656755 1.439960247  
C -0.172816869 -6.686400968 2.188424788  
C 1.964514698 -6.950306665 1.108188518  
C 0.731206319 -7.481481621 1.484919126  
H -0.555426826 -4.790492598 3.097657185  
H 3.268276822 -5.258330972 1.154676236  
H -1.137261730 -7.087537117 2.485744294  
H 2.679911172 -7.558428916 0.561856072  
H 0.476530652 -8.507173948 1.233662369  
C 3.634369092 -3.269982904 3.082073077  
C 4.112014492 -4.442621729 3.695342672  
C 4.535180310 -2.224231847 2.838812904  
C 5.456152135 -4.562299226 4.045122321  
C 5.882274411 -2.348208106 3.182663831  
C 6.346132904 -3.517863529 3.785659663  
H 3.435193424 -5.266446108 3.896395819  
H 4.185405686 -1.307581697 2.387595277  
H 5.808060908 -5.474386674 4.518554044  
H 6.566541037 -1.529576113 2.978679699  
H 7.394274183 -3.616360915 4.053006282  
C 0.991951229 -2.901497567 4.251233540  
C -0.376735542 -2.582233187 4.245962581  
C 1.638372468 -3.075229814 5.483006280  
C -1.082966320 -2.451803489 5.440115748  
C 0.930496866 -2.935019016 6.677607851  
C -0.429067918 -2.624665835 6.660335646  
H -0.896877513 -2.424246050 3.305049158  
H 2.695404272 -3.313374373 5.519136578  
H -2.139827860 -2.203201975 5.417261668  
H 1.446859002 -3.069396945 7.623891136  
H -0.975020671 -2.512399895 7.592094086

=====  
8A-TS2  
=====

C -0.636012362 -0.092945386 0.737502056  
C 0.562318952 -0.588941853 2.573637586  
Rh 1.628626251 -0.022949525 0.776870348  
P 1.637346998 2.478907402 1.418598970  
P 3.822978160 0.034408862 -0.157016380  
C 1.315075146 -1.839276314 -0.120130012

C 0.049655590 -2.257384200 -0.213185378  
C -1.081836512 -1.484414225 0.411186712  
C -2.137310329 -1.646164446 -0.713545951  
C -0.576335765 -3.316289045 -1.105253719  
O -1.973510987 -2.997418613 -1.131531690  
H -1.235478484 0.492126198 1.425227494  
H -0.413921171 0.491622125 -0.163648796  
H 2.139651334 -2.390766331 -0.565654844  
H -0.145682968 -3.292266911 -2.117174370  
H -0.466401884 -4.333569326 -0.709478375  
H -3.168099044 -1.516439418 -0.375331676  
H -1.935720887 -0.936244698 -1.534230057  
H -1.464588258 -2.003636727 1.298851597  
C 1.635155814 -1.276958101 2.390201136  
C 2.567098696 -2.303571718 2.887211271  
H 3.569089130 -1.877819737 3.009978293  
H 2.216597028 -2.688288773 3.850657524  
H 2.639659328 -3.127835847 2.170834247  
C -0.284852244 -0.077437721 3.657445928  
O -1.133574092 0.787361595 3.563185489  
O 0.063445339 -0.674825767 4.813716322  
C -0.630136967 -0.185644973 5.985205706  
H -0.392215037 0.869906480 6.141090310  
H -1.709809170 -0.300980405 5.867075901  
H -0.262959910 -0.793159418 6.811699563  
C 4.427890574 -1.501521766 -0.960976981  
C 4.904057068 -2.535834714 -0.137217399  
C 4.351520981 -1.709317170 -2.344785615  
C 5.299560420 -3.751619099 -0.690044687  
C 4.749530418 -2.929886493 -2.894025142  
C 5.220531475 -3.952292028 -2.070814775  
H 4.980486639 -2.385189692 0.935921331  
H 3.991505571 -0.923136508 -2.999778950  
H 5.673435563 -4.541289658 -0.044803767  
H 4.693139976 -3.077162279 -3.968664741  
H 5.529144853 -4.900226760 -2.501529185  
C 3.776314016 1.282575284 -1.496809140  
C 2.655805059 1.240659021 -2.347926008  
C 4.755341756 2.261283912 -1.702321100  
C 2.531065312 2.149210257 -3.397849176  
C 4.621415401 3.172596719 -2.750739768  
C 3.516821690 3.117553175 -3.600642860  
H 1.886756131 0.485031510 -2.196928258  
H 5.605254172 2.339667457 -1.034866373  
H 1.667485723 2.099911643 -4.055243706  
H 5.379829492 3.936060278 -2.893437149  
H 3.419730971 3.829928784 -4.414641110  
C 5.197737724 0.425931529 0.984475133  
C 6.525305602 0.459165760 0.525386626  
C 4.940612541 0.629042435 2.345535319  
C 7.565021910 0.738604521 1.410821012  
C 5.983785909 0.899287141 3.232537140  
C 7.297246635 0.963037758 2.765047738  
H 6.746199844 0.256571421 -0.518690429  
H 3.920528585 0.594547245 2.706805917  
H 8.587061926 0.772838677 1.045041608  
H 5.765715691 1.065327240 4.283559313  
H 8.111170291 1.176488421 3.451286239  
C 2.831542862 3.739729121 0.771278955  
C 2.511666826 4.677488656 -0.219308754  
C 4.110194772 3.782628379 1.352596190

C 3.452444963 5.625573104 -0.625525048  
C 5.047841579 4.726343358 0.941502081  
C 4.722408373 5.652447858 -0.052100974  
H 1.527803985 4.694119185 -0.670824502  
H 4.373602682 3.092023097 2.144842995  
H 3.182774138 6.348431408 -1.390414028  
H 6.029512896 4.743133369 1.406604394  
H 5.449688869 6.394750692 -0.368535112  
C 1.704753427 2.887020922 3.211402990  
C 1.473226650 4.208327305 3.631337405  
C 2.055991922 1.928785934 4.169358936  
C 1.565324330 4.550339602 4.978398822  
C 2.157399451 2.273413558 5.519552020  
C 1.907539249 3.583313281 5.928848240  
H 1.225474659 4.971158286 2.899629777  
H 2.238111476 0.904746605 3.872640624  
H 1.377679570 5.574894798 5.286218071  
H 2.432304322 1.514248303 6.246479545  
H 1.985591277 3.853941929 6.977677481  
C 0.000027461 3.059859178 0.820963077  
C -0.238520740 3.015820071 -0.565820510  
C -1.047508836 3.407711202 1.681488882  
C -1.488318459 3.352780502 -1.080058384  
C -2.301713239 3.736168292 1.160904628  
C -2.524334423 3.716701935 -0.215260641  
H 0.553456517 2.710503553 -1.246126288  
H -0.904107944 3.394718480 2.755192334  
H -1.655890407 3.325929099 -2.153259681  
H -3.107787289 4.000475622 1.839024115  
H -3.501197099 3.974629525 -0.613874169

=====

8B-TS1

=====

C -0.120141609 -0.069398005 0.030523525  
C 0.098744317 -0.034055055 2.300625790  
C 2.640762051 0.168201168 0.178359589  
C 1.294293373 0.060936000 2.721961877  
Rh 1.350033149 -1.258348401 1.014627647  
P 3.131876985 -2.608698810 1.971046595  
P 0.823315233 -2.690929523 -0.952490607  
C 0.420554393 1.056461228 -0.434830515  
C 1.839994203 1.425307618 -0.078137497  
C 2.223650300 2.278288870 -1.313554429  
C -0.060940527 2.040267030 -1.482247288  
O 1.020612953 2.959394386 -1.651344880  
H 3.466983631 0.294700273 0.878943845  
H 2.980064588 -0.302055469 -0.742833857  
H -1.125215980 -0.412582271 -0.186832291  
H -0.291308008 1.515326250 -2.421966353  
H -0.947156066 2.605079591 -1.172624854  
H 2.993372645 3.027767764 -1.114893490  
H 2.557371007 1.622733118 -2.134766486  
H 1.832405544 2.069244719 0.812174414  
C 2.194078505 0.686774426 3.710407287  
H 3.128774328 1.021856865 3.253680240  
H 1.676588574 1.542163345 4.156904921  
H 2.461152168 -0.016586688 4.503279283  
C -1.285247169 0.302466528 2.656605904  
O -1.532672806 1.148588948 3.488194221  
O -2.206039036 -0.451508089 2.031901445  
C -3.577980588 -0.184840347 2.398062885

H -3.720665890 -0.327910190 3.471925530  
H -3.847932789 0.841091874 2.136550711  
H -4.170414887 -0.898390402 1.826279624  
C 0.711317189 -1.704805735 -2.495773940  
C 1.887598273 -1.181474130 -3.059573778  
C -0.517671085 -1.399951410 -3.095675379  
C 1.837563793 -0.388454503 -4.204838065  
C -0.565616117 -0.603470014 -4.242218833  
C 0.608409046 -0.097603106 -4.800432321  
H 2.854873052 -1.403557313 -2.619095141  
H -1.440355521 -1.785823503 -2.675769855  
H 2.757337244 0.001052739 -4.631472076  
H -1.525679211 -0.380266780 -4.698659822  
H 0.567190782 0.522337232 -5.690895461  
C 1.748790805 -4.204662107 -1.450651694  
C 1.808380379 -5.241849179 -0.507443882  
C 2.360946869 -4.381196579 -2.698055944  
C 2.503072755 -6.414517205 -0.788240616  
C 3.053809438 -5.560497338 -2.977581836  
C 3.137007413 -6.573403468 -2.022786472  
H 1.296561963 -5.141199517 0.442682362  
H 2.298993878 -3.612127300 -3.459038059  
H 2.542548622 -7.204255986 -0.043429971  
H 3.524911147 -5.686393938 -3.948363535  
H 3.681097989 -7.487158753 -2.243663809  
C -0.843720778 -3.412079321 -0.682838984  
C -1.389817627 -4.289631584 -1.635936384  
C -1.556011376 -3.152583754 0.493881486  
C -2.633600617 -4.875956819 -1.418952125  
C -2.798592990 -3.749509286 0.713517261  
C -3.339782699 -4.608611715 -0.241867768  
H -0.837167679 -4.517973761 -2.542599158  
H -1.157980100 -2.477366654 1.241368466  
H -3.049395527 -5.548611100 -2.163435310  
H -3.337578064 -3.543140413 1.633981734  
H -4.306576375 -5.073903235 -0.072013044  
C 4.499332034 -3.229193209 0.927479800  
C 5.560675421 -3.953871777 1.499740112  
C 4.538061459 -2.935209131 -0.438743412  
C 6.609482236 -4.407364569 0.704483809  
C 5.591112231 -3.384946432 -1.234305142  
C 6.624300533 -4.127323424 -0.664949932  
H 5.575022233 -4.146666538 2.568499993  
H 3.737701974 -2.359155350 -0.881037093  
H 7.421476098 -4.970767874 1.154715318  
H 5.599582300 -3.157840672 -2.296061332  
H 7.446176539 -4.478767557 -1.281736963  
C 2.250815579 -4.054840407 2.682893240  
C 0.992193251 -3.817913878 3.263898588  
C 2.749375540 -5.365395020 2.649520571  
C 0.248228287 -4.870374053 3.797607754  
C 2.001918621 -6.414788883 3.183493035  
C 0.751871959 -6.171263476 3.757278701  
H 0.595280453 -2.806679582 3.313018035  
H 3.703729659 -5.576467381 2.180920447  
H -0.722873773 -4.673333931 4.242220553  
H 2.396513699 -7.426336698 3.148659441  
H 0.171890198 -6.992803384 4.167335448  
C 4.074586091 -1.932157730 3.392805683  
C 3.795188948 -2.297613979 4.716941312  
C 5.084196102 -0.989145143 3.138919315

C 4.502535783 -1.713898991 5.770171295  
C 5.786459326 -0.409153854 4.193172879  
C 5.492024711 -0.764699667 5.512166034  
H 3.030086412 -3.036107990 4.932421093  
H 5.337136674 -0.722938469 2.115815090  
H 4.280822208 -2.007114827 6.792314767  
H 6.566538376 0.317661717 3.986277805  
H 6.039157613 -0.311639495 6.333439508

=====  
8B-TS2  
=====

C 0.115223994 0.012558891 0.125330527  
C 0.215731561 0.324677727 2.388609858  
Rh 2.112592696 0.022635879 1.200122834  
P 2.417849770 2.625724487 1.011091076  
P 4.443681846 -0.403786787 1.412176486  
C 1.824173664 -1.978627507 0.981511014  
C 0.653442956 -2.367763239 0.468102893  
C -0.441263067 -1.379151765 0.160937633  
C -0.953937682 -1.986949430 -1.170067569  
C 0.235348204 -3.693557581 -0.143597691  
O -0.928108446 -3.388088231 -0.926763311  
H -0.584237120 0.842420394 0.143385642  
H 0.806903663 0.155942322 -0.713031432  
H 2.614490291 -2.687775699 1.214433662  
H 1.034009194 -4.114940811 -0.771279956  
H -0.046021448 -4.444836624 0.604361654  
H -1.978588780 -1.703772036 -1.423731861  
H -0.285714820 -1.701482315 -2.001175175  
H -1.253364452 -1.472246220 0.894834775  
C 1.189284559 -0.281118183 2.959946909  
C -1.050469555 1.058213098 2.570497077  
H -0.967261970 2.075217694 2.172650189  
H -1.892408128 0.563141140 2.076279627  
H -1.256480064 1.114813633 3.644287167  
C 1.627740605 -0.810756079 4.254193842  
O 2.658549380 -1.420825414 4.448641753  
O 0.745587821 -0.476130940 5.215288056  
C 1.095939774 -0.912721155 6.549747794  
H 1.156133398 -2.002714547 6.587902802  
H 2.059820874 -0.490556868 6.844594736  
H 0.297373923 -0.546831556 7.193330325  
C 5.311013967 0.394787408 2.801952700  
C 4.587466165 1.115011979 3.758996194  
C 6.699811800 0.249491442 2.954960385  
C 5.241279029 1.718307029 4.832994042  
C 7.353252661 0.862156265 4.022511070  
C 6.625929878 1.600716663 4.960295246  
H 3.514863299 1.212488460 3.656936643  
H 7.266567801 -0.347699119 2.246327720  
H 4.668464325 2.282668725 5.563307959  
H 8.428966934 0.755882225 4.128241117  
H 7.138404625 2.072899157 5.793503400  
C 5.078508363 -2.125434370 1.482501992  
C 5.681592332 -2.750388780 0.380951271  
C 4.953682550 -2.829380300 2.693180412  
C 6.157437029 -4.058574960 0.491811409  
C 5.432685568 -4.134262318 2.793602343  
C 6.035425555 -4.753701881 1.695378913  
H 5.796195860 -2.222355087 -0.559403515  
H 4.478893434 -2.360391024 3.547012719

H 6.630119433 -4.529756012 -0.365218879  
H 5.335309052 -4.667541146 3.734932771  
H 6.409924907 -5.769628537 1.778979980  
C 5.103773776 0.263479278 -0.166143673  
C 4.406345186 -0.093773431 -1.336608496  
C 6.213551176 1.110621977 -0.267961587  
C 4.817558914 0.383039712 -2.581307257  
C 6.619161369 1.587127545 -1.516081437  
C 5.926601837 1.228283722 -2.673270544  
H 3.554531525 -0.769593077 -1.276815884  
H 6.748424942 1.426299667 0.619875148  
H 4.277088230 0.089056858 -3.476929950  
H 7.473008764 2.254526574 -1.577884111  
H 6.247514324 1.603755678 -3.640351398  
C 3.975412867 3.513395436 0.541633327  
C 4.201981980 4.069705734 -0.723959949  
C 4.950607753 3.683133548 1.539263747  
C 5.383110428 4.765966018 -0.988219745  
C 6.128178204 4.375849263 1.271031839  
C 6.350467988 4.918622556 0.003393447  
H 3.461116736 3.982864914 -1.509180674  
H 4.788009744 3.289925575 2.535577738  
H 5.539107911 5.195185129 -1.973924416  
H 6.867497107 4.497879982 2.057520394  
H 7.265604201 5.465443215 -0.205153424  
C 1.871830700 3.694088650 2.411223733  
C 1.502590722 3.157983139 3.651714284  
C 1.879374620 5.092786802 2.255590647  
C 1.139911358 3.995679691 4.709898122  
C 1.510129409 5.925720831 3.308735843  
C 1.139739172 5.379675960 4.541822888  
H 1.490321979 2.087165902 3.800862035  
H 2.183751815 5.528354362 1.308296141  
H 0.858983327 3.560620196 5.664918112  
H 1.518977790 7.002906676 3.169849489  
H 0.858465724 6.030975106 5.363934124  
C 1.257587693 3.017631526 -0.359740014  
C 1.527110820 2.461955875 -1.624507421  
C 0.064564569 3.728281873 -0.173805868  
C 0.634148616 2.633049277 -2.679804714  
C -0.836758499 3.883965543 -1.230830940  
C -0.554888178 3.341439784 -2.484068199  
H 2.437526833 1.887830150 -1.782683940  
H -0.164963580 4.168838828 0.791151801  
H 0.862085053 2.207747385 -3.653169067  
H -1.758294011 4.436764885 -1.071833006  
H -1.255436366 3.468354545 -3.304003945

=====  
9A

=====  
Rh 0.663257432 1.160847339 0.563500252  
C -0.455414611 -0.640883570 -0.743290678  
C 0.072675051 2.530973183 -0.909139060  
C 0.059012123 0.195608797 -1.692332135  
C -0.434104225 1.613439363 -2.012754057  
C 0.164069927 1.834953673 -3.429000272  
C 1.019182964 -0.176695926 -2.804102601  
O 0.505888054 0.536051887 -3.917509681  
H -0.647606393 3.262293395 -0.545878241  
H 1.008870854 3.024326881 -1.194503327  
H -0.114864280 -1.676528350 -0.710429720

H 2.049792193 0.151410513 -2.574472173  
H 1.036297834 -1.244810732 -3.033969093  
H -0.535443686 2.285661660 -4.135778953  
H 1.065204712 2.467663183 -3.368614090  
H -1.528139730 1.608274797 -2.045564779  
C -1.574997318 -0.251394012 0.159883717  
C -1.289961226 0.857373002 0.864305182  
C -2.799200729 -1.120809773 0.215329435  
C -2.231167927 1.595350656 1.726776611  
P 1.265766103 2.855240217 2.017452287  
H -3.566721542 -0.682505477 0.852882094  
H -3.201276993 -1.292641595 -0.789674023  
H -2.525032147 -2.095229594 0.637941576  
C 1.124249042 2.512901843 3.811474554  
C 2.194284587 2.712223224 4.694314351  
H 3.169767808 3.001551549 4.321307829  
C 2.018739897 2.514387015 6.064238508  
H 2.860643542 2.658839385 6.734079930  
C 0.780965911 2.117049143 6.571383524  
H 0.651688603 1.963399998 7.638507263  
C -0.287868994 1.911907645 5.696954483  
H -1.256460468 1.598615386 6.075936218  
C -0.117245882 2.105994114 4.326803717  
H -0.962034287 1.949510071 3.670071809  
C 3.043006150 3.061732833 1.601671868  
C 3.785795950 4.170192987 2.038059380  
H 3.319379028 4.921780721 2.668162554  
C 5.118571859 4.320126047 1.653623501  
H 5.684364220 5.177392923 2.006199354  
C 5.721624984 3.383974792 0.808948622  
H 6.757013220 3.510051079 0.507427796  
C 4.985622946 2.290721119 0.347633368  
H 5.440549271 1.557410184 -0.311738848  
C 3.657347760 2.135333322 0.743108715  
H 3.114475362 1.260179802 0.387165396  
C 0.618168516 4.561689855 1.840631212  
C -0.139092390 5.174246254 2.849345574  
H -0.365544758 4.640986921 3.765679474  
C -0.601681535 6.481495485 2.688125611  
H -1.178673184 6.945458733 3.483083411  
C -0.320139605 7.191421319 1.520192680  
H -0.682299647 8.207712938 1.397661820  
C 0.445747478 6.592482701 0.516577059  
H 0.685331477 7.142057981 -0.388934353  
C 0.917348447 5.291280024 0.676420211  
H 1.540112023 4.855815963 -0.096681443  
O -2.104990474 2.932279388 1.609024503  
O -3.037470294 1.061197042 2.469354920  
C -3.051889754 3.710261827 2.372845696  
H -4.073580846 3.419061554 2.119849072  
H -2.856807219 4.746254257 2.103563084  
H -2.892687239 3.556887296 3.443983809  
P 1.594762667 -0.800939394 1.987647993  
C 2.780494776 -1.838460313 1.037896388  
C 3.476233558 -2.896534342 1.649385336  
C 3.022675758 -1.567778563 -0.314215748  
C 4.370696317 -3.670830830 0.913100841  
C 3.925210980 -2.337422269 -1.051193679  
C 4.597650504 -3.395295676 -0.439373147  
H 3.318980517 -3.109678272 2.702656532  
H 2.503689403 -0.748076843 -0.794924889

|       |              |              |              |   |              |              |              |
|-------|--------------|--------------|--------------|---|--------------|--------------|--------------|
| H     | 4.896223093  | -4.489224902 | 1.396541651  | C | -0.762060697 | 2.230632020  | 4.216287446  |
| H     | 4.100003168  | -2.109460901 | -2.099026192 | H | -1.311747498 | 1.755521086  | 3.408619549  |
| H     | 5.298361397  | -3.999037895 | -1.008105053 | C | 2.901291849  | 2.929798965  | 2.295365378  |
| C     | 2.545555572  | -0.582394167 | 3.555832651  | C | 3.661431892  | 3.480136287  | 1.249753916  |
| C     | 2.049330055  | -0.952081706 | 4.812337936  | H | 3.189037086  | 4.061834016  | 0.468006914  |
| C     | 3.849513888  | -0.063115545 | 3.468784574  | C | 5.045098066  | 3.305567723  | 1.212796844  |
| C     | 2.841325953  | -0.807280355 | 5.954045729  | H | 5.615977391  | 3.743014761  | 0.398822372  |
| C     | 4.634599641  | 0.080770453  | 4.610203552  | C | 5.694211073  | 2.583976151  | 2.217194240  |
| C     | 4.133933272  | -0.292288849 | 5.860301052  | H | 6.770901409  | 2.447536119  | 2.183958885  |
| H     | 1.051659520  | -1.365469309 | 4.909319610  | C | 4.948222173  | 2.050065335  | 3.268426683  |
| H     | 4.265662712  | 0.212318576  | 2.505203106  | H | 5.434118811  | 1.490085903  | 4.061534103  |
| H     | 2.441240138  | -1.104231625 | 6.919315388  | C | 3.564352243  | 2.218286094  | 3.308411873  |
| H     | 5.642297748  | 0.476838995  | 4.520382609  | H | 3.009162894  | 1.783483999  | 4.129010112  |
| H     | 4.748544345  | -0.189014988 | 6.749783512  | C | 0.592285780  | 4.650262917  | 1.677795552  |
| C     | 0.213162710  | -1.918866826 | 2.434751032  | C | -0.055849492 | 5.531985371  | 2.557835662  |
| C     | 0.148392993  | -3.262211120 | 2.037816300  | H | -0.273394239 | 5.231611204  | 3.576051192  |
| C     | -0.853779259 | -1.372600552 | 3.167727036  | C | -0.435252470 | 6.806386782  | 2.133945201  |
| C     | -0.951810425 | -4.046249257 | 2.392346430  | H | -0.936361009 | 7.471598542  | 2.830959036  |
| C     | -1.946323410 | -2.158130663 | 3.525184909  | C | -0.176961943 | 7.223805938  | 0.828674988  |
| C     | -1.996460330 | -3.499843554 | 3.139584366  | H | -0.474765167 | 8.215275797  | 0.501714134  |
| H     | 0.953588899  | -3.704703910 | 1.460979618  | C | 0.464585170  | 6.354280392  | -0.055808524 |
| H     | -0.837864600 | -0.328511073 | 3.455578748  | H | 0.668890101  | 6.665403718  | -1.076065926 |
| H     | -0.989014171 | -5.087328846 | 2.084446947  | C | 0.840479169  | 5.078452255  | 0.361108345  |
| H     | -2.764856468 | -1.712560361 | 4.082035714  | H | 1.317476080  | 4.422024034  | -0.354758010 |
| H     | -2.850517450 | -4.113296741 | 3.411677301  | O | -4.420496812 | 1.024285732  | 0.749495105  |
| ===== |              |              |              |   |              |              |              |
| 9B    |              |              |              |   |              |              |              |
| ===== |              |              |              |   |              |              |              |
| Rh    | 0.336743628  | 1.120461713  | 1.065590700  | O | -3.835353529 | -1.038408488 | 0.029258897  |
| C     | -1.182179574 | -0.592937237 | -0.028767691 | C | -5.224028888 | -1.418439455 | 0.095393624  |
| C     | 0.737520480  | 1.883363028  | -0.829082827 | H | -5.257929131 | -2.459461781 | -0.224913794 |
| C     | -0.088126400 | -0.494186949 | -0.837850808 | H | -5.601399530 | -1.313529167 | 1.116120415  |
| C     | 0.339824918  | 0.706695360  | -1.700558047 | H | -5.823294380 | -0.790010059 | -0.567979810 |
| C     | 1.485305239  | 0.077235062  | -2.531760406 | P | 1.708791171  | -0.703251107 | 2.402402935  |
| C     | 0.749528770  | -1.677708506 | -1.290638308 | C | 3.166391387  | -1.233468972 | 1.428795773  |
| O     | 1.194920654  | -1.312379351 | -2.592151577 | C | 3.766147195  | -2.501104509 | 1.543115336  |
| H     | 0.191452328  | 2.797294144  | -1.053083425 | C | 3.737979974  | -0.293026279 | 0.556901133  |
| H     | 1.816027893  | 2.073346077  | -0.810152501 | C | 4.873438121  | -2.831615986 | 0.762036887  |
| H     | -1.432225729 | -1.576923899 | 0.357791539  | C | 4.853779498  | -0.622044189 | -0.213145508 |
| H     | 1.603425220  | -1.849438645 | -0.619743131 | C | 5.414663539  | -1.896895500 | -0.124957065 |
| H     | 0.170168873  | -2.602403071 | -1.361118055 | H | 3.380712002  | -3.225280574 | 2.253793463  |
| H     | 1.543797238  | 0.460563108  | -3.552803394 | H | 3.318271870  | 0.705599426  | 0.491790462  |
| H     | 2.450725739  | 0.250220169  | -2.027741804 | H | 5.317913559  | -3.818409674 | 0.852018369  |
| H     | -0.504151397 | 0.968953798  | -2.350331440 | H | 5.283040756  | 0.120061996  | -0.879862108 |
| C     | -2.103170202 | 0.511085070  | 0.317611576  | H | 6.275201127  | -2.158719868 | -0.733078565 |
| C     | -1.530352974 | 1.697569441  | 0.661034895  | C | 2.317940279  | -0.706708850 | 4.149667336  |
| C     | -3.565797773 | 0.235992069  | 0.391685287  | C | 1.438084375  | -0.352167216 | 5.185989844  |
| C     | -2.174859984 | 3.030427099  | 0.830757688  | C | 3.647704102  | -1.015822739 | 4.476834354  |
| H     | -2.095758843 | 3.387961092  | 1.862702942  | C | 1.867093605  | -0.337059121 | 6.512058249  |
| H     | -1.663905246 | 3.774087317  | 0.211010307  | C | 4.074919492  | -0.994314527 | 5.805917033  |
| H     | -3.231910184 | 2.986407603  | 0.561275636  | C | 3.187968312  | -0.659855946 | 6.829913604  |
| P     | 1.063792106  | 2.958357574  | 2.232326402  | H | 0.413573730  | -0.076366325 | 4.972221387  |
| C     | 0.461346972  | 2.870518339  | 3.958018905  | H | 4.359881298  | -1.270150559 | 3.700791423  |
| C     | 1.147913187  | 3.488182478  | 5.015607378  | H | 1.165075935  | -0.065945967 | 7.294754872  |
| H     | 2.087209805  | 3.999879722  | 4.831393833  | H | 5.105999586  | -1.246232899 | 6.037807991  |
| C     | 0.628911119  | 3.444555524  | 6.309051673  | H | 3.522593375  | -0.647716770 | 7.862775492  |
| H     | 1.172455198  | 3.916538844  | 7.122012153  | C | 0.462860086  | -2.068709989 | 2.404537058  |
| C     | -0.587062063 | 2.803783819  | 6.557918940  | C | 0.597771742  | -3.285327566 | 1.722557160  |
| H     | -0.990940067 | 2.777231168  | 7.565821695  | C | -0.752571011 | -1.796450879 | 3.060359027  |
| C     | -1.284849425 | 2.201694222  | 5.509144241  | C | -0.448179237 | -4.211857803 | 1.713526756  |
| H     | -2.234546022 | 1.708600746  | 5.695547645  | C | -1.789331679 | -2.725967735 | 3.059380856  |
|       |              |              |              | C | -1.639877691 | -3.939821109 | 2.384382795  |
|       |              |              |              | H | 1.503590859  | -3.516264723 | 1.176283117  |
|       |              |              |              | H | -0.909296396 | -0.839019637 | 3.548029028  |

H -0.326230070 -5.148401266 1.176830560  
H -2.719415043 -2.495477832 3.570620596  
H -2.449639483 -4.663150049 2.374356356

=====  
11A  
=====

Rh -0.863794980 2.297718236 1.285748203  
P 0.900108227 2.313798843 2.862573586  
C -0.810915400 0.363580671 0.822929867  
C -0.306225447 -0.265290563 -0.231779904  
C 0.498147657 0.294279397 -1.391028686  
C 1.158818797 -0.994835232 -1.919907337  
C -0.394338531 -1.781112899 -0.446773821  
O 0.186453553 -2.014816787 -1.722903211  
C 0.369432757 1.121286594 4.149030125  
C -0.116193344 1.541596213 5.396442544  
H -0.104489696 2.593352898 5.662978220  
C -0.619779462 0.606412472 6.304177513  
H -0.989655336 0.943269252 7.268361223  
C -0.640378051 -0.751540850 5.980940673  
H -1.033146521 -1.475057868 6.689063850  
C -0.142251453 -1.177575921 4.745628562  
H -0.146384541 -2.233340974 4.490865626  
C 0.354092209 -0.250112808 3.832305005  
H 0.721488682 -0.588282155 2.868129103  
C 2.666411172 2.030162160 2.516803598  
C 3.413790010 1.037164375 3.166897841  
H 2.956397975 0.413370646 3.927477454  
C 4.758289834 0.849342494 2.840536858  
H 5.327986584 0.076432484 3.347971577  
C 5.368881673 1.650393203 1.874913199  
H 6.414379433 1.499029849 1.624128752  
C 4.630972564 2.649345665 1.233274752  
H 5.100001341 3.277746829 0.482097638  
C 3.287062404 2.838901789 1.546471194  
H 2.719343294 3.607189292 1.031344384  
C 0.783013660 3.977181138 3.622743263  
C 1.912770551 4.706911688 4.018555466  
H 2.904052045 4.278921196 3.911204727  
C 1.767998381 5.991252494 4.546805036  
H 2.650954423 6.546138942 4.849853072  
C 0.501715823 6.563078851 4.683782247  
H 0.397554222 7.565198630 5.088447561  
C -0.630477853 5.840498868 4.298190499  
H -1.621153457 6.275341938 4.392692648  
C -0.491204636 4.557388102 3.774453231  
H -1.386954082 4.010498429 3.486308861  
H -1.367547118 -0.175862471 1.595422006  
H 0.159567730 -2.315004780 0.344851582  
H -1.421568315 -2.160427579 -0.459475170  
H 1.406516183 -0.956742668 -2.983512652  
H 2.080736929 -1.208928876 -1.349900386  
H -0.182267829 0.671551808 -2.167622084  
C 0.122734052 3.303424151 -0.085909026  
C 0.989481795 2.819927322 -0.999775568  
C 1.506907500 1.389258605 -1.017122603  
C -0.288513903 4.728436461 0.160977721  
C 1.482996036 3.770298853 -2.044995618  
H 1.916174583 1.149588107 -0.031171255  
H 2.339741988 1.344200946 -1.720413615  
H -0.955071186 4.828728414 1.028963759

H 0.593794715 5.346933351 0.343911953  
H -0.808186123 5.144118541 -0.706324447  
O 1.338651988 4.981899361 -2.041197234  
O 2.116560760 3.120614538 -3.050548779  
C 2.611379238 3.960249798 -4.109973576  
H 3.083376430 3.283704661 -4.822471648  
H 1.790444750 4.506920067 -4.581127038  
H 3.336181731 4.681050029 -3.722475645  
P -3.162182414 2.439841603 0.556636894  
C -3.994358860 1.382762954 1.804284333  
C -5.184327508 0.694294505 1.537042908  
C -3.387324866 1.238342791 3.065688503  
C -5.756958797 -0.115187005 2.519123747  
C -3.957744416 0.426068359 4.042895791  
C -5.147798018 -0.251302534 3.768160858  
H -5.661361800 0.784939303 0.566018717  
H -2.458704234 1.758160214 3.302051105  
H -6.681495744 -0.643444499 2.305367727  
H -3.466775206 0.319821835 5.005625956  
H -5.598093936 -0.886919420 4.524874738  
C -3.709023432 4.152036656 0.915774141  
C -4.072714438 4.534397772 2.216481194  
C -3.619294144 5.130285666 -0.089143566  
C -4.337220770 5.874002650 2.504949418  
C -3.888640483 6.465263216 0.204704484  
C -4.241644841 6.841116602 1.503103439  
H -4.166473867 3.789873676 3.001021917  
H -3.344778600 4.847874771 -1.101369806  
H -4.631436928 6.158646895 3.511349993  
H -3.821021321 7.212374597 -0.580496416  
H -4.449573595 7.882605089 1.729699689  
C -3.873824790 2.000121338 -1.060111093  
C -3.225325618 1.037855405 -1.847646245  
C -5.085698578 2.557111911 -1.504243809  
C -3.778862979 0.639905559 -3.064283187  
C -5.630819972 2.156713332 -2.723729830  
C -4.979674851 1.198973929 -3.505772737  
H -2.302085459 0.595365208 -1.497188509  
H -5.598808674 3.302694898 -0.904454998  
H -3.269225075 -0.107069719 -3.665695700  
H -6.566144530 2.592837612 -3.062013156  
H -5.407826654 0.890919107 -4.454937575

=====  
11B  
=====

Rh -0.690332312 2.599389798 1.510917244  
P 1.070829781 2.292536057 3.103472238  
C -1.131295967 0.677615086 1.404893389  
C -0.894448772 -0.222348726 0.456340266  
C -0.055912709 -0.062520970 -0.798597191  
C 0.101335670 -1.538375745 -1.229826805  
C -1.408475669 -1.659250325 0.467912421  
O -1.091656606 -2.184267708 -0.817254848  
C 0.888019950 0.852719778 4.216178854  
C 0.805361755 1.009875284 5.608506788  
H 0.868701844 1.997715491 6.052546232  
C 0.643175508 -0.105853867 6.431471735  
H 0.579203427 0.028686445 7.507301641  
C 0.567776524 -1.385728795 5.879663187  
H 0.442028126 -2.250780088 6.523847249  
C 0.652484505 -1.548831192 4.494326396

H 0.594021289 -2.541229287 4.056386516  
C 0.803768167 -0.438876201 3.664914578  
H 0.838504710 -0.573501215 2.589540165  
C 2.779753254 2.247544908 2.449436966  
C 3.570155178 1.091620928 2.485682455  
H 3.210961961 0.197389685 2.984644718  
C 4.832852002 1.084629085 1.887296824  
H 5.437140823 0.182974075 1.926452441  
C 5.320462237 2.227528513 1.252960863  
H 6.303747735 2.219050360 0.792180903  
C 4.542890566 3.389793305 1.228923870  
H 4.920537079 4.289443102 0.751532801  
C 3.280852691 3.400183305 1.817902458  
H 2.691028002 4.311577419 1.809069421  
C 0.998180404 3.767379730 4.187696602  
C 2.140519127 4.319555372 4.785707058  
H 3.117640656 3.884325861 4.602463100  
C 2.026369689 5.435858320 5.615059138  
H 2.916448741 5.857794407 6.072598364  
C 0.776182186 6.007391860 5.858630031  
H 0.693019126 6.877727230 6.503072596  
C -0.367009056 5.457763918 5.274614196  
H -1.344133561 5.894407566 5.460416590  
C -0.256404038 4.344666132 4.444510831  
H -1.156062997 3.935508472 3.991675068  
H -1.701791490 0.384858924 2.296982339  
H -0.917821126 -2.247193076 1.265017301  
H -2.492138682 -1.723767054 0.607947515  
H 0.212812666 -1.672751640 -2.309207613  
H 0.984255585 -1.978912412 -0.730529078  
H -0.638243882 0.468923991 -1.565337067  
C 0.592867916 2.952743255 0.006548928  
C 1.346803269 2.135777579 -0.752046220  
C 1.311546308 0.627155414 -0.607283778  
C 0.585384358 4.414035058 0.118798461  
C 2.351417267 2.631291501 -1.765885983  
H 1.703339981 0.365724658 0.384942793  
H 2.016657515 0.206531249 -1.333528984  
H 3.349033884 2.279795694 -1.470725471  
H 2.134650149 2.185967622 -2.745391894  
H 2.377069237 3.712100910 -1.868779977  
O 1.110204196 5.183156541 -0.824195079  
O 0.036898859 4.887392510 1.135286914  
C 0.944447448 6.613886780 -0.655076774  
H 1.396581800 6.941867629 0.283429609  
H -0.119210188 6.860580875 -0.661372832  
H 1.450579228 7.060904217 -1.509331597  
P -2.669499019 3.206526087 0.264960384  
C -2.353051308 4.231528454 -1.214594875  
C -1.579901382 3.686390400 -2.254619876  
C -2.819534361 5.549355668 -1.324705787  
C -1.284907599 4.445007824 -3.384964814  
C -2.514606574 6.307145534 -2.456917812  
C -1.748028848 5.758696101 -3.486355111  
H -1.203885747 2.672257748 -2.174902807  
H -3.420015033 5.984409395 -0.532706678  
H -0.688312355 4.012850639 -4.182954276  
H -2.883367843 7.325849489 -2.535455128  
H -1.513975385 6.351653607 -4.365761748  
C -3.642254829 4.262992033 1.414898268  
C -2.964335915 5.261659169 2.140884936

C -5.026674742 4.111165691 1.588672661  
C -3.663908217 6.086440756 3.021308216  
C -5.716718695 4.937135119 2.477798507  
C -5.040008764 5.923568269 3.197837960  
H -1.899195302 5.408138937 2.002952764  
H -5.568641264 3.354313784 1.031701560  
H -3.129134078 6.859411280 3.566371432  
H -6.788207056 4.810672492 2.602491799  
H -5.582634026 6.564469654 3.886366562  
C -3.796413579 1.865498679 -0.252883264  
C -4.183717584 1.667219742 -1.584690574  
C -4.264356355 0.979946833 0.733970775  
C -5.011471079 0.593665725 -1.922957736  
C -5.101095141 -0.079798297 0.394063106  
C -5.469625088 -0.282500665 -0.939742907  
H -3.848154896 2.345246081 -2.361914870  
H -3.985483078 1.126084015 1.773141834  
H -5.300852445 0.448911981 -2.959689097  
H -5.463083269 -0.749396011 1.168880920  
H -6.113258489 -1.114939517 -1.207249071

9A-TS

C -0.493124319 0.262189742 -0.140336567  
C -0.174517785 -0.279495137 1.878056151  
Rh 1.540840703 0.041117631 0.802031807  
C 0.805438412 -2.227884112 0.972776282  
C 0.696817252 -1.898288256 -0.357242261  
C -0.453239976 -1.047541892 -0.897989342  
C -0.071474334 -0.971805100 -2.391161721  
C 1.409979955 -2.507876839 -1.549562098  
O 0.569469880 -2.210996163 -2.663582682  
H -1.461541803 0.564962175 0.245750737  
H -0.056564094 1.100703281 -0.687907290  
H 1.482676166 -3.025199356 1.268862034  
H 2.410362764 -2.072397981 -1.678919094  
H 1.521947276 -3.593649975 -1.475126748  
H -0.928440868 -0.876251655 -3.061481386  
H 0.612392465 -0.121994785 -2.562514190  
H -1.386228279 -1.613274895 -0.782565653  
C -0.027104081 -1.621202648 2.032564996  
P 1.890215353 2.321284192 1.123887740  
C 3.097823010 2.732392805 2.432511016  
C 4.216370075 3.551084717 2.235121528  
H 4.442140511 3.951248775 1.254044533  
C 5.074571662 3.824904601 3.300040567  
H 5.945226451 4.452395674 3.135028114  
C 4.829602260 3.283653320 4.562463110  
H 5.504037954 3.497840358 5.386598482  
C 3.719128421 2.461152494 4.762296756  
H 3.522446745 2.031441355 5.740164926  
C 2.855310795 2.185370876 3.704324271  
H 1.979933610 1.565932198 3.874547365  
C 2.409147001 3.131180775 -0.442119329  
C 2.601764974 4.522106107 -0.493502228  
H 2.477561806 5.121243532 0.403804629  
C 2.933889385 5.142833663 -1.696287361  
H 3.087394192 6.217714590 -1.721068351  
C 3.053183228 4.390099569 -2.868474228  
H 3.302234262 4.878627589 -3.805669686  
C 2.835172110 3.012009010 -2.831782607

H 2.911010033 2.422150269 -3.740707973  
C 2.514476200 2.386422642 -1.625153069  
H 2.346836254 1.312582957 -1.596613611  
C 0.429098776 3.375149382 1.536521559  
C 0.274862760 4.002478205 2.781346407  
H 0.994859636 3.838492508 3.573798602  
C -0.796003755 4.870089563 3.006010051  
H -0.890186536 5.361695353 3.970223914  
C -1.733820276 5.109386790 2.002271580  
H -2.562912572 5.788092040 2.180385569  
C -1.594812210 4.480949057 0.762575661  
H -2.313032363 4.669846846 -0.029925580  
C -0.518939827 3.628571239 0.528745121  
H -0.398983209 3.194299418 -0.458205265  
P 3.834124144 -0.621414400 1.179500233  
C 3.936573037 -1.350663807 2.863015378  
C 2.912385300 -1.148668256 3.798484935  
C 5.056405028 -2.118233771 3.233663850  
C 3.008243816 -1.693006159 5.080365743  
C 5.150540904 -2.656420740 4.515234206  
C 4.126820394 -2.443154410 5.442346780  
H 2.032082400 -0.577621145 3.531532541  
H 5.850546385 -2.302208057 2.516318066  
H 2.204318414 -1.526016436 5.791532576  
H 6.021183463 -3.245433205 4.788425998  
H 4.201242759 -2.865919192 6.440152666  
C 4.381458711 -2.018719288 0.098279810  
C 5.033865671 -1.784731890 -1.122287886  
C 4.069357112 -3.343665336 0.447087233  
C 5.351387053 -2.843824517 -1.973479678  
C 4.390481213 -4.400332337 -0.403750444  
C 5.026076851 -4.153910522 -1.621643018  
H 5.315984175 -0.779403447 -1.411969840  
H 3.601024546 -3.561293396 1.401229820  
H 5.859806777 -2.641054154 -2.911547020  
H 4.149140063 -5.417788544 -0.109445147  
H 5.274305018 -4.976187406 -2.285763958  
C 5.232256590 0.565015513 1.066171893  
C 6.200459273 0.702747198 2.070180391  
C 5.350519036 1.340838862 -0.098095714  
C 7.277688199 1.571418095 1.893129643  
C 6.427853517 2.206751682 -0.272924792  
C 7.400913714 2.318559267 0.721437320  
H 6.113928541 0.151631649 2.998783037  
H 4.593255124 1.286235810 -0.870143849  
H 8.019082003 1.667961879 2.681000838  
H 6.498256152 2.797316297 -1.181941840  
H 8.242896682 2.991739522 0.588831405  
C -0.434461158 -2.444612503 3.223274269  
H -1.098485421 -3.265787104 2.929359922  
H 0.456761596 -2.890213937 3.682828432  
H -0.932830504 -1.837562040 3.981114447  
C -0.834918522 0.608647672 2.869153526  
O -0.366728029 0.797846520 3.978785897  
O -1.985247671 1.132196033 2.432690183  
C -2.723750027 1.927975299 3.390069438  
H -3.141801138 1.277155939 4.162387326  
H -2.071301660 2.671714495 3.845376604  
H -3.516144050 2.407659182 2.818149531

=====

9B-TS

=====  
C -0.522989493 0.239660435 -0.085087439  
C -0.199743581 -0.302112473 1.917512989  
Rh 1.514587141 0.056547894 0.851115902  
C 0.845732291 -2.229844437 0.932708002  
C 0.721719009 -1.880041414 -0.389189953  
C -0.427443393 -1.023884277 -0.916788719  
C 0.002084243 -0.849955902 -2.387416484  
C 1.462448796 -2.432497256 -1.592498784  
O 0.662080960 -2.064794742 -2.715426500  
H -1.511845942 0.454228464 0.311506965  
H -0.167035607 1.138443199 -0.591578248  
H 1.543094805 -3.010893459 1.216301659  
H 2.471505343 -2.007162606 -1.670937847  
H 1.556184936 -3.522683823 -1.572417744  
H -0.832154785 -0.716830091 -3.079824582  
H 0.683542401 0.014486828 -2.479086780  
H -1.349939326 -1.616693795 -0.870735518  
C -0.000924432 -1.655783657 2.000147758  
C -0.292922931 -2.425835985 3.229915064  
C -1.015292305 0.551854162 2.829701396  
H -0.461427526 0.725748745 3.758880548  
H -1.253768778 1.516767249 2.385559055  
H -1.935131709 0.033945150 3.115341308  
P 1.853484043 2.328962068 1.193192671  
C 2.985293564 2.725923324 2.575271793  
C 4.016542381 3.670173998 2.507709702  
H 4.236779176 4.182374770 1.578886202  
C 4.798767946 3.928563303 3.633375230  
H 5.605685859 4.652045633 3.567363444  
C 4.560357722 3.255250254 4.832289989  
H 5.175042885 3.461119701 5.703630196  
C 3.538521216 2.307364904 4.904758634  
H 3.351793030 1.768461834 5.829090129  
C 2.759040889 2.042585911 3.780973897  
H 1.968598333 1.302448151 3.839973978  
C 2.465062329 3.122140707 -0.345691362  
C 2.628831699 4.515492307 -0.423363251  
H 2.401985927 5.139191804 0.436363552  
C 3.062662084 5.108257057 -1.608588482  
H 3.194693382 6.185434044 -1.653287848  
C 3.312817961 4.323859731 -2.738355744  
H 3.643942787 4.790495836 -3.661239067  
C 3.118460955 2.942351804 -2.680364323  
H 3.292578653 2.328238187 -3.559218221  
C 2.694726574 2.345618979 -1.491316783  
H 2.545393429 1.269174277 -1.446146463  
C 0.369785697 3.358360473 1.547446851  
C 0.069144120 3.818813109 2.838185388  
H 0.740462999 3.614306127 3.664621499  
C -1.097419460 4.547625714 3.071951619  
H -1.315089012 4.901250920 4.075604486  
C -1.977255674 4.824857757 2.025213934  
H -2.884707121 5.391731485 2.211352838  
C -1.679128392 4.382785290 0.734236151  
H -2.349215628 4.610759283 -0.089535418  
C -0.512722396 3.659095922 0.494973032  
H -0.276244513 3.355759267 -0.520509819  
O -0.758106845 -1.961577899 4.257380385  
O 0.082996340 -3.717597906 3.094372118  
C -0.063701951 -4.534662581 4.271794901



|   |              |              |              |   |              |              |              |
|---|--------------|--------------|--------------|---|--------------|--------------|--------------|
| H | 0.189233346  | -5.547431903 | 3.958823822  | C | 1.625361561  | 2.914993226  | -2.280041922 |
| H | 0.620899225  | -4.193549968 | 5.053481732  | H | 2.610780619  | 2.591427939  | -2.596404782 |
| H | -1.088325737 | -4.488100478 | 4.647285465  | C | 0.751253175  | 3.458837691  | -3.222547959 |
| P | 3.817504805  | -0.591782427 | 1.271900524  | H | 1.066391834  | 3.542083155  | -4.258621409 |
| C | 3.873487749  | -1.502197469 | 2.868857836  | C | -0.512581181 | 3.904814390  | -2.837260456 |
| C | 2.817553591  | -1.408618812 | 3.783604399  | H | -1.187312022 | 4.333666612  | -3.572339173 |
| C | 4.983769860  | -2.303893699 | 3.194677802  | C | -0.904359022 | 3.803930085  | -1.500328962 |
| C | 2.854193028  | -2.107131878 | 4.990923407  | H | -1.883445008 | 4.156799003  | -1.189999416 |
| C | 5.023722955  | -2.994557301 | 4.404001010  | C | -0.036658958 | 3.256108115  | -0.557639742 |
| C | 3.957767965  | -2.900568161 | 5.303354586  | H | -0.349315031 | 3.197671265  | 0.480070470  |
| H | 1.951415503  | -0.806519363 | 3.547761395  | C | 2.245907180  | 3.194030725  | 1.747388972  |
| H | 5.812920281  | -2.393501929 | 2.499231627  | C | 2.116895510  | 4.578140026  | 1.532597005  |
| H | 2.012745267  | -2.030534713 | 5.673165170  | H | 2.016616646  | 4.966769271  | 0.523853719  |
| H | 5.886252937  | -3.610473634 | 4.642020650  | C | 2.114799693  | 5.458987989  | 2.612582981  |
| H | 3.990744024  | -3.446795938 | 6.241740403  | H | 2.014028840  | 6.525977101  | 2.435996370  |
| C | 4.425039519  | -1.846868391 | 0.052873490  | C | 2.242444502  | 4.971677074  | 3.915894860  |
| C | 5.045008222  | -1.455774902 | -1.145183778 | H | 2.240971335  | 5.661159307  | 4.755314165  |
| C | 4.185427454  | -3.215853091 | 0.262680771  | C | 2.366810983  | 3.599998663  | 4.136076417  |
| C | 5.407460992  | -2.403057484 | -2.104056267 | H | 2.464602345  | 3.211934036  | 5.145686489  |
| C | 4.555893904  | -4.160439564 | -0.694554167 | C | 2.365053796  | 2.712970009  | 3.059766409  |
| C | 5.161725879  | -3.759122739 | -1.886083633 | H | 2.441245867  | 1.649641835  | 3.252951693  |
| H | 5.266134163  | -0.413425283 | -1.337754755 | H | -0.201501252 | 0.674436964  | -0.782867053 |
| H | 3.727645591  | -3.557483190 | 1.184583269  | H | -2.550534073 | -1.213352589 | -1.313215615 |
| H | 5.888591153  | -2.076236901 | -3.021492842 | H | -1.230018646 | -1.376409766 | -2.497597423 |
| H | 4.371384399  | -5.213803504 | -0.503971009 | H | -1.369451086 | -4.586792192 | -0.123263177 |
| H | 5.446584342  | -4.494381868 | -2.632278946 | H | -2.529429967 | -3.335767452 | 0.397105379  |
| C | 5.199654016  | 0.620857720  | 1.374575954  | H | 0.510952705  | -3.106130806 | 0.227505470  |
| C | 6.044201851  | 0.694850305  | 2.491868268  | C | 0.376843513  | -1.341892878 | 2.522471628  |
| C | 5.439216877  | 1.484937707  | 0.292994265  | C | -0.566448546 | -2.407527857 | 1.960782770  |
| C | 7.121971774  | 1.580542790  | 2.504304427  | C | -0.595265560 | 1.123073155  | 2.755686825  |
| C | 6.519721271  | 2.363977300  | 0.305630024  | C | 0.979095799  | -1.506134512 | 3.872108669  |
| C | 7.372071790  | 2.407542866  | 1.409689195  | H | -1.604104872 | -2.137000973 | 2.201878605  |
| H | 5.864508834  | 0.073965630  | 3.361092150  | H | -0.357323598 | -3.341780115 | 2.486027359  |
| H | 4.775375158  | 1.494515891  | -0.561145040 | H | -0.498208154 | 1.100506639  | 3.848294590  |
| H | 7.765789492  | 1.622940661  | 3.378038371  | H | -0.319279435 | 2.108597934  | 2.384608138  |
| H | 6.687569632  | 3.017329920  | -0.545796212 | H | -1.645482959 | 0.909309585  | 2.510080581  |
| H | 8.216830741  | 3.090150162  | 1.422272851  | O | 0.728587875  | -2.700447668 | 4.423499861  |

=====  
11A-TS  
=====

|    |              |              |              |   |             |              |             |
|----|--------------|--------------|--------------|---|-------------|--------------|-------------|
| C  | 0.022389582  | -0.208179722 | -0.190547093 | H | 1.007626365 | -3.931345943 | 6.008416960 |
| C  | 0.229793959  | 0.036207664  | 2.212731090  | H | 2.444004737 | -2.946161984 | 5.579637408 |
| Rh | 1.679972268  | -0.158811209 | 1.088332619  | H | 1.065870383 | -2.183629592 | 6.423055920 |
| P  | 2.331541784  | 2.032178448  | 0.326708281  | P | 3.891166777 | -0.880065357 | 1.893164756 |
| C  | -0.595210843 | -1.372797353 | -0.387220241 | C | 3.913133945 | -2.436675583 | 2.875605367 |
| C  | -0.457757745 | -2.637019012 | 0.446762790  | C | 4.884261617 | -2.697294730 | 3.853563619 |
| C  | -1.583695353 | -3.515753631 | -0.144200879 | C | 3.034893843 | -3.460880620 | 2.495840360 |
| C  | -1.576366150 | -1.694420620 | -1.510240533 | C | 4.955822523 | -3.955994631 | 4.452325948 |
| O  | -1.695049397 | -3.111337169 | -1.503248378 | C | 3.112148207 | -4.717720591 | 3.091795638 |
| C  | 4.012204597  | 2.251605350  | -0.369416208 | C | 4.071349918 | -4.967612222 | 4.074992662 |
| C  | 4.854672717  | 3.311529317  | -0.004070083 | H | 5.589059876 | -1.928092190 | 4.148435898 |
| H  | 4.533717161  | 4.040040358  | 0.731790359  | H | 2.284445169 | -3.273596345 | 1.734160829 |
| C  | 6.126296828  | 3.419350517  | -0.566890616 | H | 5.709003112 | -4.145162456 | 5.211812460 |
| H  | 6.773482270  | 4.241258749  | -0.273901626 | H | 2.420048481 | -5.499171616 | 2.792320334 |
| C  | 6.572469670  | 2.472802534  | -1.492006555 | H | 4.131024960 | -5.946279602 | 4.542387624 |
| H  | 7.568611786  | 2.555026824  | -1.917193926 | C | 4.942749415 | 0.302455284  | 2.798800933 |
| C  | 5.735043302  | 1.420495829  | -1.868596735 | C | 4.684698337 | 0.506059878  | 4.167462546 |
| H  | 6.073050368  | 0.673163569  | -2.579830857 | C | 5.904793732 | 1.092261605  | 2.153290180 |
| C  | 4.461540029  | 1.314309655  | -1.311503761 | C | 5.400453835 | 1.467637795  | 4.876535487 |
| H  | 3.823306302  | 0.487779927  | -1.602048547 | C | 6.611117167 | 2.057454474  | 2.871840699 |
| C  | 1.241034407  | 2.809611612  | -0.935796460 | C | 6.365994732 | 2.244507812  | 4.231724695 |
|    |              |              |              | H | 3.913488035 | -0.071701543 | 4.667370081 |

H 6.102533619 0.970871292 1.094775840  
H 5.199190110 1.614043014 5.933899860  
H 7.351244272 2.664647330 2.359345813  
H 6.920615650 2.995273393 4.787321060  
C 4.799922492 -1.471091793 0.411038762  
C 6.191918323 -1.629281761 0.382424046  
C 4.041823319 -1.898401156 -0.690724035  
C 6.815135030 -2.155577950 -0.749129671  
C 4.665276554 -2.433559508 -1.817945385  
C 6.056981288 -2.551510183 -1.854222447  
H 6.792575764 -1.342259677 1.239712287  
H 2.954722479 -1.811486534 -0.678633539  
H 7.895808340 -2.264252327 -0.763502373  
H 4.066319087 -2.755634184 -2.664886311  
H 6.546353029 -2.965374720 -2.730800593

=====

11B-TS

=====

C 0.706572772 -0.998346687 0.214972616  
C -0.028703393 0.609878045 1.407109281  
Rh 1.978103125 0.063684599 1.463580092  
P 3.075438012 1.170759268 -0.176469633  
C 0.397525836 -2.135811830 0.838700764  
C 0.334373035 -2.180659101 2.359440406  
C 0.203161129 -3.703061652 2.625326035  
C 0.160128839 -3.543868241 0.341923154  
O 0.638985766 -4.344518607 1.426421658  
C 4.640141304 0.309472836 -0.631663880  
C 5.788154170 1.001054289 -1.047441126  
H 5.795250124 2.084036123 -1.086087601  
C 6.948514145 0.300252131 -1.378236055  
H 7.831833895 0.849115280 -1.692406971  
C 6.984889009 -1.093821088 -1.290186310  
H 7.895918371 -1.632327409 -1.533779538  
C 5.843807157 -1.789435180 -0.884608332  
H 5.859862397 -2.872011155 -0.799986656  
C 4.678812443 -1.092423932 -0.563474242  
H 3.800317296 -1.638512390 -0.236698748  
C 2.182093970 1.260752975 -1.775052516  
C 2.299076741 0.215416242 -2.707109827  
H 2.948396116 -0.630096028 -2.505394314  
C 1.600527525 0.265179354 -3.912326379  
H 1.705592881 -0.545404678 -4.627654468  
C 0.783785149 1.358931641 -4.205177221  
H 0.248011760 1.400956521 -5.148903560  
C 0.668374113 2.403335534 -3.286356973  
H 0.046609375 3.263726889 -3.518023940  
C 1.355931542 2.356721300 -2.074132436  
H 1.257806952 3.170619350 -1.365432229  
C 3.525045976 2.894705757 0.216352882  
C 3.958017658 3.771658896 -0.794027134  
H 3.975510800 3.448568941 -1.830397466  
C 4.348593044 5.070496335 -0.473549148  
H 4.678644404 5.742105686 -1.260676972  
C 4.308798751 5.507043117 0.852406508  
H 4.613373841 6.519992925 1.099320669  
C 3.863926753 4.646117185 1.855702893  
H 3.818517332 4.984228661 2.886468916  
C 3.465809567 3.349739116 1.537731795  
H 3.090568717 2.694311669 2.312974362  
H 0.656797578 -0.799283228 -0.850191718

H -0.909496143 -3.738653617 0.152714899  
H 0.726470716 -3.801072144 -0.556381877  
H 0.829772246 -4.063717693 3.443760749  
H -0.846931188 -3.959497537 2.841523794  
H 1.277741655 -1.821894675 2.810086069  
C -0.875119514 0.101914673 2.334451284  
C -0.795412685 -1.299410245 2.906883150  
C -0.311937660 1.921105100 0.750992943  
C -2.043440836 0.893248844 2.881785729  
H -1.766817977 -1.778824546 2.710401844  
H -0.707524913 -1.239173889 4.000305251  
H -1.987010546 0.933483174 3.976493199  
H -2.989289407 0.399066785 2.626198763  
H -2.085800058 1.916547701 2.508482932  
O -1.444204737 1.860364040 0.021968631  
O 0.370365384 2.925252477 0.848048139  
C -1.878808019 3.098250454 -0.577783786  
H -1.160489410 3.433819535 -1.327561501  
H -1.988637590 3.873263603 0.185100239  
H -2.837964936 2.874214752 -1.043783003  
P 3.885387058 -0.238249581 2.897551479  
C 2.995334816 -0.238300435 4.507571908  
C 2.041793145 0.768966021 4.750594765  
C 3.199072259 -1.237896532 5.470540194  
C 1.315346626 0.778819822 5.941065580  
C 2.463084913 -1.226762306 6.655713321  
C 1.522059475 -0.222089745 6.892850864  
H 1.854888818 1.538441201 4.005734949  
H 3.926871783 -2.023941142 5.296389707  
H 0.585410628 1.563258816 6.120061534  
H 2.626980965 -2.004088100 7.396514586  
H 0.951122983 -0.219566711 7.816982573  
C 4.607162052 -1.916781176 2.755321882  
C 5.863272849 -2.219275646 3.304559481  
C 3.853804695 -2.945477658 2.165156842  
C 6.352804351 -3.525208089 3.255784023  
C 4.339383415 -4.250562189 2.131256410  
C 5.592708648 -4.542435247 2.674628243  
H 6.461079418 -1.439909626 3.766077581  
H 2.889559453 -2.741911378 1.714890989  
H 7.328140927 -3.747387829 3.679305648  
H 3.730554129 -5.029062734 1.680690192  
H 5.976926056 -5.557940222 2.645274521  
C 5.297160084 0.901618426 3.100999094  
C 5.281535691 1.908562941 4.078016715  
C 6.375085317 0.829377224 2.203835009  
C 6.319749234 2.837028415 4.143087859  
C 7.407364721 1.762425491 2.273222351  
C 7.379904342 2.771332905 3.237770186  
H 4.464121535 1.971654054 4.788985388  
H 6.416533782 0.042026489 1.460856580  
H 6.300245656 3.610735995 4.905268330  
H 8.233265552 1.697247896 1.570815909  
H 8.184804838 3.498754744 3.288799036

=====

10

=====

C 0.614980944 -0.304813913 -0.439140705  
C 0.141545738 -0.267720376 1.014534034  
Rh 1.873947775 -0.466473381 2.333438860  
C 1.114204498 -2.390085715 1.653145863

C 2.141713381 -1.932762245 0.760937876  
C 1.714749544 -1.363828483 -0.585646525  
C 3.060077039 -0.960808220 -1.189109304  
C 3.488960125 -2.553712276 0.503767681  
O 4.024105388 -1.877448216 -0.639681077  
H -0.230716521 -0.511320969 -1.104051427  
H 0.986748777 0.686417629 -0.709247148  
H 1.170299401 -3.302319835 2.234016826  
H 4.180698295 -2.467080858 1.344819148  
H 3.372752596 -3.628033684 0.284181027  
H 3.088987821 -1.042088861 -2.279616625  
H 3.317554970 0.068088280 -0.910923841  
H 1.335283763 -2.228884918 -1.150577622  
C 0.008000732 -1.509607675 1.765516197  
C -1.141435042 -1.846000855 2.674939653  
C -0.806880137 0.815743843 1.410033633  
P 2.862717878 1.712724865 2.054636504  
H -1.503517530 -0.972043820 3.215086545  
H -1.966322487 -2.225498401 2.057501946  
H -0.865347335 -2.618779212 3.395122869  
C 2.551521195 2.865352310 3.451015178  
C 2.687158155 4.256995220 3.297211644  
H 2.937385801 4.676865068 2.327740646  
C 2.481745394 5.110039375 4.380400552  
H 2.590028507 6.182460929 4.245827333  
C 2.132650134 4.591482606 5.630321355  
H 1.970788932 5.259199980 6.471256740  
C 1.980955118 3.213711185 5.787797351  
H 1.702338829 2.798197020 6.751688347  
C 2.185065037 2.359179164 4.704735421  
H 2.067586753 1.293418344 4.848998813  
C 4.687296927 1.683661406 1.809254938  
C 5.261728842 0.574179002 1.170524940  
H 4.646540692 -0.248881760 0.834779849  
C 6.639611213 0.507460720 0.960396544  
H 7.058665502 -0.359720862 0.458402856  
C 7.465264190 1.545550947 1.396626585  
H 8.539150297 1.493640644 1.243665008  
C 6.899078460 2.657136116 2.026624879  
H 7.533008802 3.471845195 2.365340493  
C 5.520390746 2.730581967 2.230071609  
H 5.105189509 3.592473816 2.740332225  
C 2.291662225 2.678105864 0.596364146  
C 3.055989436 2.749904719 -0.577943650  
H 4.040007020 2.294660528 -0.618955812  
C 2.568789241 3.427342532 -1.696973753  
H 3.171039896 3.474806496 -2.599718312  
C 1.322468787 4.051687766 -1.652103765  
H 0.946395085 4.582227721 -2.521936188  
C 0.567081360 4.003931312 -0.478623462  
H -0.395957384 4.503665787 -0.433207911  
C 1.042983372 3.319265364 0.637433107  
H 0.452528626 3.293025436 1.548159166  
O -1.461719442 1.328581703 0.355750259  
O -0.978720380 1.199808293 2.557778064  
C -2.431719245 2.353246726 0.652187905  
H -3.222599532 1.951992921 1.290582194  
H -2.832812144 2.662599074 -0.312278332  
H -1.959683953 3.194416942 1.164163306  
P 3.181828040 -1.369917862 4.192269004  
C 1.839023766 -1.852337894 5.353930841

C 0.669328276 -1.072711222 5.378777608  
C 1.974419372 -2.903549343 6.274245555  
C -0.344917695 -1.342935794 6.296412803  
C 0.953890125 -3.176766110 7.185412205  
C -0.205299891 -2.397780110 7.199740776  
H 0.528294791 -0.254470126 4.675518967  
H 2.876763141 -3.506814190 6.282960963  
H -1.243269769 -0.732435519 6.299160494  
H 1.068771426 -3.995075414 7.890339383  
H -0.995176746 -2.611281841 7.913950575  
C 4.138665850 -2.912188062 3.893649383  
C 5.536647264 -2.895039552 3.774033620  
C 3.457682494 -4.123079812 3.671553150  
C 6.230307721 -4.053734811 3.419228829  
C 4.154459627 -5.278332948 3.320254317  
C 5.544321721 -5.245278239 3.182245360  
H 6.093974292 -1.985298776 3.965370655  
H 2.380741427 -4.171046767 3.796077961  
H 7.312665504 -4.022078882 3.334687459  
H 3.611416686 -6.205150309 3.159143315  
H 6.087583268 -6.143397009 2.904637396  
C 4.267060768 -0.312770979 5.240946410  
C 3.986432610 -0.102685532 6.601232344  
C 5.359398706 0.356568212 4.665549407  
C 4.780546373 0.755970421 7.360260445  
C 6.151209361 1.213365399 5.428676951  
C 5.863632881 1.414945804 6.778702446  
H 3.147706328 -0.599785342 7.074509363  
H 5.595611654 0.220437156 3.618749849  
H 4.548340897 0.909828789 8.410237117  
H 6.984166118 1.726150940 4.957599579  
H 6.475414324 2.087865941 7.372557513

=====

12

=====

C -0.305607766 0.006773210 0.728868002  
C -0.123874996 0.572005608 2.135584801  
Rh 2.057355492 -0.549874004 2.646021186  
C 0.283674968 -1.675436651 3.127399765  
C 0.531460410 -2.124133507 1.832811581  
C -0.219499320 -1.515503137 0.670442579  
C 0.420848785 -2.236992924 -0.516870626  
C 1.025449812 -3.468205488 1.348044145  
O 0.627641551 -3.562274920 -0.019983944  
H -1.284291468 0.341719629 0.359311377  
H 0.432764737 0.471296533 0.069696716  
H 0.325308954 -2.318667351 3.994209655  
H 2.115384014 -3.527282252 1.431063346  
H 0.589566358 -4.308006472 1.903353165  
H -0.220560851 -2.306254123 -1.398582308  
H 1.369236230 -1.761447125 -0.799145194  
H -1.231954830 -1.937384793 0.776260021  
C -0.074762702 -0.263932346 3.262693209  
C -0.249992552 0.231287248 4.674433572  
C -0.382102710 2.055017311 2.203427501  
H -0.227356594 2.481752277 3.189228165  
H 0.257489413 2.576454399 1.485316502  
H -1.418566144 2.247537348 1.895249811  
P 3.476885589 1.275165111 1.872976682  
C 3.288656613 2.882186651 2.728449478  
C 3.993664301 4.016102642 2.285157789

H 4.667293185 3.941329037 1.436092940  
C 3.836885819 5.236944976 2.937521006  
H 4.380809776 6.108427841 2.584601284  
C 2.988214770 5.339626939 4.045136719  
H 2.871450980 6.292546682 4.552997867  
C 2.298666976 4.214292444 4.496410121  
H 1.637741550 4.280129817 5.355860542  
C 2.448413293 2.989969821 3.841445846  
H 1.894111746 2.130617735 4.197336929  
C 5.312996393 1.225701716 1.641719551  
C 5.924714755 0.956036907 0.407578713  
H 5.329833829 0.789986175 -0.481839875  
C 7.315877635 0.909222554 0.299534930  
H 7.767396077 0.704656941 -0.667251741  
C 8.120598459 1.130387494 1.417842108  
H 9.202344906 1.090261788 1.331399033  
C 7.520525711 1.425385168 2.644561773  
H 8.130029435 1.614313361 3.523021247  
C 6.132203121 1.478598568 2.755872713  
H 5.691297465 1.720703803 3.715246833  
C 2.859638872 1.508721320 0.160525683  
C 2.283678537 2.700241392 -0.300352748  
H 2.206628731 3.560164365 0.356721987  
C 1.808550757 2.789635402 -1.611359032  
H 1.358410309 3.716421399 -1.955333482  
C 1.917042297 1.701905846 -2.478007481  
H 1.553185692 1.779270697 -3.498308106  
C 2.493426290 0.511372346 -2.028056089  
H 2.578038351 -0.341598984 -2.695377688  
C 2.949841182 0.410413944 -0.714921255  
H 3.372972340 -0.527010480 -0.361116916  
O 0.051116121 1.326888551 5.108025688  
O -0.779099349 -0.739294663 5.441554080  
C -0.952577907 -0.407219292 6.837922152  
H -1.390696575 -1.294601135 7.292979658  
H 0.013712979 -0.172267628 7.292210742  
H -1.616792452 0.453044548 6.944511024  
P 3.734986362 -1.893323848 3.557894363  
C 3.142647251 -3.117315001 4.813654162  
C 2.117878910 -2.710003068 5.684551233  
C 3.781148295 -4.342349559 5.058883932  
C 1.706050982 -3.524563398 6.736780186  
C 3.362194946 -5.160090942 6.111194298  
C 2.318847809 -4.761930824 6.947042737  
H 1.649041191 -1.741073516 5.554231817  
H 4.616447667 -4.662413740 4.446638588  
H 0.909137217 -3.189003565 7.394454926  
H 3.863873147 -6.108522869 6.280199448  
H 1.997445286 -5.401026392 7.763761051  
C 4.799909879 -0.869086072 4.654706923  
C 4.190903708 0.205089465 5.323742187  
C 6.139001711 -1.173690840 4.931903332  
C 4.918464421 0.986680193 6.220263271  
C 6.866520942 -0.384929335 5.824247697  
C 6.264736861 0.702145818 6.462290604  
H 3.147939244 0.442866297 5.133962770  
H 6.622700022 -2.014621407 4.445853809  
H 4.436212542 1.824775017 6.714877972  
H 7.908556969 -0.621666159 6.019497445  
H 6.837385717 1.315559909 7.151481774  
C 4.823792404 -2.801448574 2.392110537

C 4.482429206 -4.086633577 1.929643485  
C 5.928273416 -2.153901551 1.812891356  
C 5.222930109 -4.700578243 0.919140821  
C 6.663984758 -2.772095336 0.802115415  
C 6.314324337 -4.044405438 0.347350623  
H 3.648360720 -4.625554898 2.365340998  
H 6.223338060 -1.168799397 2.147386256  
H 4.943631238 -5.694451354 0.581969879  
H 7.511961685 -2.247273811 0.372535059  
H 6.888255417 -4.522756009 -0.440471469

=====

13

=====

C 1.488389845 5.497343958 10.780622588  
C 1.134248994 6.830348934 10.523618665  
H 1.111294248 7.552952380 11.331397643  
C 0.805807603 7.262623434 9.234529653  
C 0.479288971 8.715463338 8.979389770  
C 0.804262445 6.324435214 8.198427901  
H 0.537685674 6.644723567 7.193093211  
C 1.130696607 4.981708061 8.422233107  
C 1.123654037 3.992185478 7.280025478  
C 1.4711196537 4.579547646 9.717502124  
H 1.724259324 3.539919648 9.888638651  
C 2.062671119 3.138163644 12.312480696  
C 3.183513973 2.521660754 11.752691836  
H 4.049421951 3.114729606 11.472191863  
C 3.211789407 1.132816208 11.558227066  
C 4.449412683 0.475816096 10.996460399  
C 2.085080296 0.385013831 11.914896730  
H 2.094987391 -0.692192106 11.760900165  
C 0.938908470 0.984808636 12.457543228  
C -0.269945322 0.150792053 12.810649470  
C 0.939815464 2.367337782 12.655532865  
H 0.059636333 2.850425212 13.076494899  
C 3.549694922 5.724025593 12.910704962  
C 3.814618707 7.003470473 12.341581682  
H 3.225229486 7.347566922 11.502998411  
C 4.826606269 7.803036966 12.806704924  
H 5.017160725 8.766549964 12.340625494  
C 5.637610814 7.388795707 13.890104593  
C 6.667717695 8.216106263 14.409159774  
H 6.825263119 9.194676691 13.962772299  
C 7.457588327 7.783964414 15.449448429  
H 8.247247633 8.420352161 15.838230687  
C 7.243751659 6.503638805 16.011463968  
H 7.867104728 6.168450112 16.835708686  
C 6.256683311 5.677751442 15.525320673  
H 6.101873197 4.704909930 15.975383415  
C 5.421209059 6.088435624 14.448577431  
C 4.382703204 5.242777807 13.922281863  
C 4.321650972 3.834846653 14.435333592  
C 5.393315302 2.953900019 14.050988823  
C 6.413615950 3.346096541 13.136686800  
H 6.382953977 4.335515743 12.696181279  
C 7.438165019 2.489500509 12.802993226  
H 8.204103670 2.813510015 12.104248527  
C 7.506033696 1.191766042 13.363249434  
H 8.326208292 0.530264477 13.099698664  
C 6.526128582 0.770424892 14.231328347  
H 6.558316100 -0.227738404 14.659274588

C 5.451277510 1.627482766 14.586657746  
C 4.432325971 1.208456496 15.473074773  
H 4.477217523 0.208242374 15.896570120  
C 3.400207262 2.047580275 15.804658125  
H 2.646138157 1.693764053 16.493694140  
C 3.321200761 3.369965907 15.284166715  
C 0.958906397 3.432688303 16.957685488  
C 0.757242484 3.781521646 18.293300811  
H 1.228041323 4.668872129 18.705768194  
C -0.052757825 2.989115366 19.126503643  
C -0.248042526 3.378693985 20.572873205  
C -0.651015662 1.849701509 18.590436265  
H -1.278033849 1.229553605 19.227556627  
C -0.473138456 1.480256414 17.246176936  
C -1.127293520 0.230940670 16.706042743  
C 0.323929860 2.286731626 16.436790683  
H 0.460438093 2.023705770 15.390555787  
C 2.771868246 5.752933107 16.757593648  
C 3.624576605 5.382560959 17.808415025  
H 3.701612303 4.338705615 18.102541250  
C 4.400735276 6.339944185 18.465184153  
C 5.367473610 5.944045984 19.555137616  
C 4.323185724 7.670384950 18.034336698  
H 4.947592880 8.417542046 18.520852758  
C 3.498268251 8.062574344 16.976075735  
C 3.526092794 9.484528778 16.470516421  
C 2.707418106 7.090436715 16.352513153  
H 2.073144453 7.366454679 15.512542250  
P 1.917422165 4.951383703 12.488656729  
P 1.910051835 4.469828380 15.782784972  
Rh 0.399839442 5.468408864 14.198995242  
C -0.703040327 6.987378415 13.048494440  
C -1.238824909 5.915967842 12.739819063  
H -0.470467737 8.032608517 13.088388597  
C -2.150926556 4.820886869 12.368646295  
O -2.535214760 4.040139928 13.497785609  
H -3.038996150 5.252902560 11.879273713  
H -1.663965315 4.142023861 11.660708579  
C -1.008551695 6.153973316 15.998232034  
C -1.516288569 4.973953054 15.517600217  
H -0.321848123 6.169270506 16.838961429  
H -1.447039804 7.107927544 15.716045952  
H -1.175570334 4.039682142 15.949286102  
C -2.765877119 4.824304786 14.673875072  
H -3.501249665 4.264925812 15.263533214  
H -3.208771488 5.796974276 14.424070782  
H 2.667519654 9.703292974 15.829021870  
H 3.531862264 10.206353898 17.293535292  
H 4.435440251 9.651657378 15.879708090  
H 5.392017003 6.684743499 20.360635702  
H 5.114095006 4.973433465 19.990802544  
H 6.385162230 5.870950349 19.150672466  
H -1.088044359 0.194715071 15.614668574  
H -0.627117862 -0.666945009 17.088783799  
H -2.177080926 0.168881300 17.011481644  
H -0.972738846 2.730216244 21.072216565  
H 0.696320648 3.314491422 21.126205770  
H -0.602118053 4.412034198 20.659707316  
H 4.249421053 -0.547129019 10.665168119  
H 4.846820301 1.038502023 10.145066290  
H 5.239197379 0.438874238 11.754894503

H -1.077536087 0.767582534 13.216165105  
H -0.659146061 -0.372476034 11.929921337  
H -0.018088480 -0.616434203 13.552192999  
H 1.308017048 2.972012529 7.628187225  
H 0.162599614 4.001479907 6.753912188  
H 1.896466915 4.239092243 6.542706713  
H -0.090465836 8.843468076 8.055043768  
H -0.105747606 9.144649730 9.799795179  
H 1.395389325 9.311703923 8.885832278

=====

13-TS

=====

C 1.449165290 5.613263163 11.105344953  
C 0.795334699 6.823960656 11.397250039  
H 0.713641934 7.157061495 12.429201797  
C 0.244694080 7.604667439 10.379146130  
C -0.436899995 8.917606064 10.684348331  
C 0.349331313 7.147682950 9.058097680  
H -0.080669989 7.746002879 8.256924351  
C 0.983956810 5.943752784 8.740595596  
C 1.054216411 5.464821674 7.309421332  
C 1.534637036 5.179259481 9.778755978  
H 2.019586353 4.238813433 9.539721632  
C 2.686247860 3.042169838 11.864533875  
C 3.768281615 3.027477344 10.970702068  
H 4.214553969 3.962655407 10.641743506  
C 4.297631668 1.818186777 10.514501306  
C 5.487364605 1.791325445 9.586937623  
C 3.739246085 0.624898196 10.990865960  
H 4.161167875 -0.321450726 10.658687999  
C 2.673923941 0.613050491 11.895647382  
C 2.153913161 -0.684432745 12.464205117  
C 2.143969592 1.836930603 12.319523436  
H 1.335881948 1.851507382 13.044326400  
C 3.595199914 5.498073152 13.108517775  
C 3.859570344 6.818120526 12.655386994  
H 3.230793515 7.261024722 11.892915145  
C 4.912611534 7.539008013 13.160545811  
H 5.110511994 8.543716659 12.795195271  
C 5.760925744 6.988848696 14.150551138  
C 6.847588562 7.729030736 14.685810802  
H 7.013487111 8.742079379 14.328547834  
C 7.680034389 7.173500401 15.628482277  
H 8.514582779 7.743920611 16.025673349  
C 7.450724306 5.852248135 16.081570964  
H 8.113257130 5.416472708 16.824104723  
C 6.395319438 5.115799656 15.594377271  
H 6.227092755 4.110814697 15.962464323  
C 5.520588704 5.653167490 14.608801021  
C 4.421378164 4.909308865 14.066533544  
C 4.213244935 3.497998836 14.535401849  
C 5.147466467 2.494178142 14.114902487  
C 6.243537999 2.784088359 13.254725490  
H 6.377618279 3.794341554 12.888865851  
C 7.136238856 1.803231089 12.888629095  
H 7.975429010 2.052281567 12.245211035  
C 6.971417829 0.472594062 13.341491757  
H 7.682667258 -0.291937605 13.043016856  
C 5.915598924 0.153154844 14.162405983  
H 5.781422952 -0.864168246 14.519544313  
C 4.987735747 1.145839738 14.573063034

C 3.914927338 0.840907285 15.444258694  
H 3.806646525 -0.176138218 15.811385048  
C 3.025617079 1.810566271 15.835910062  
H 2.218650653 1.549672167 16.509641358  
C 3.158771540 3.149418310 15.380279215  
C 0.835670741 3.614236767 17.126858858  
C 0.862950131 4.043667223 18.456110099  
H 1.541285110 4.832563168 18.764719914  
C 0.000992253 3.476539178 19.408520644  
C 0.055900012 3.937717224 20.845947764  
C -0.885112941 2.477468563 19.001440065  
H -1.561532537 2.039145295 19.732435578  
C -0.936210888 2.028409500 17.673210559  
C -1.895386645 0.934532522 17.268219844  
C -0.076216337 2.612514742 16.742832040  
H -0.117717689 2.290681747 15.704625931  
C 2.746013662 5.787044693 16.535156686  
C 3.690098654 5.571606223 17.551328949  
H 3.866821747 4.566533315 17.926267940  
C 4.427372430 6.637350637 18.071551339  
C 5.473403483 6.418741612 19.136648243  
C 4.216884090 7.917136288 17.539988291  
H 4.802532748 8.748698093 17.926848849  
C 3.296132106 8.153505551 16.515996471  
C 3.152884797 9.523150242 15.898308131  
C 2.553256431 7.073657805 16.026051400  
H 1.852415286 7.225911087 15.211630726  
P 2.076706586 4.630855833 12.518724652  
P 1.850050830 4.379711972 15.802320025  
Rh 0.390186123 4.685481299 14.060477982  
C -0.732791495 3.612636238 12.751868029  
C -1.752999368 4.224226170 13.260553107  
H -0.541728813 3.016222965 11.871279271  
C -3.155456302 4.550862291 12.810369708  
O -3.889161730 5.135557123 13.860709751  
H -3.087066692 5.239881953 11.951743660  
H -3.672876460 3.641895436 12.490458457  
C -0.616305276 6.017598253 15.390099410  
C -1.773018526 5.226070655 14.992987676  
H -0.312563940 5.937021926 16.429447879  
H -0.566451896 7.031985251 14.993220307  
H -2.011685185 4.401613685 15.664823320  
C -3.013590496 5.998894677 14.547374723  
H -3.543656871 6.367286512 15.430296297  
H -2.715709045 6.860229417 13.924805242  
H -1.397242998 8.996344234 10.164183183  
H -0.621067368 9.037061503 11.756163620  
H 0.177588691 9.764047897 10.355521662  
H 1.748301062 4.627249536 7.198770179  
H 0.070527040 5.129057707 6.960575498  
H 1.378817289 6.266013376 6.637579246  
H 5.432282654 0.953190408 8.885552031  
H 5.574065163 2.716718342 9.010226837  
H 6.410221743 1.673564475 10.167124212  
H 1.098829879 -0.609980764 12.744463860  
H 2.263703664 -1.510716819 11.756207194  
H 2.714554980 -0.946831063 13.369687525  
H -1.994420175 0.867916836 16.180911286  
H -1.550667955 -0.040659703 17.632544771  
H -2.891229739 1.102347525 17.691083959  
H -0.860014444 3.683249958 21.386116920

H 0.893216186 3.465529735 21.374329622  
H 0.200667649 5.020855545 20.911910069  
H 2.139933614 9.691065838 15.519231921  
H 3.385937661 10.317230803 16.613270251  
H 3.840826872 9.627541360 15.049906003  
H 5.438446116 7.203427299 19.899192272  
H 5.350594586 5.452744049 19.634325039  
H 6.474643056 6.439689872 18.689866234

=====  
14  
=====

C 1.544423783 4.986412988 10.631220841  
C 0.504535120 5.792506571 10.175157769  
H -0.150462409 6.280138534 10.887952297  
C 0.311492142 5.987414462 8.796193292  
C -0.825350413 6.859148530 8.315690636  
C 1.184040184 5.364192690 7.905172982  
H 1.044343335 5.511266736 6.836164219  
C 2.240624292 4.547014975 8.343478744  
C 3.164046252 3.894914213 7.341561889  
C 2.407643054 4.358976652 9.712529102  
H 3.210987658 3.718334870 10.066436178  
C 1.670562309 2.815727248 12.391698413  
C 2.718402722 1.905542290 12.245998056  
H 3.746229256 2.244528657 12.223288954  
C 2.451407231 0.534620731 12.122640458  
C 3.593925519 -0.441407547 11.976434679  
C 1.119293870 0.109477626 12.117560793  
H 0.903942346 -0.952152308 12.016540063  
C 0.049262056 1.010779748 12.220310056  
C -1.380636387 0.531395163 12.140871615  
C 0.339579118 2.367250850 12.368370256  
H -0.476616205 3.079480743 12.451335626  
C 3.522913121 5.339327860 12.745382485  
C 3.728797315 6.580204124 12.061333798  
H 3.054508322 6.857939996 11.259237908  
C 4.753840925 7.421128629 12.402011760  
H 4.895002017 8.354597732 11.864021478  
C 5.635950121 7.092956019 13.459855263  
C 6.687268960 7.967296653 13.839035284  
H 6.802610414 8.905069725 13.302291741  
C 7.544616225 7.635211236 14.861244608  
H 8.347875936 8.309609640 15.142435008  
C 7.382088295 6.407927241 15.546961753  
H 8.064676477 6.146329925 16.350379488  
C 6.372461150 5.538980645 15.202285840  
H 6.272216921 4.602300366 15.736389843  
C 5.462372321 5.847638086 14.149414808  
C 4.394395232 4.958227903 13.775438067  
C 4.362952552 3.626557025 14.467853993  
C 5.400713483 2.692222289 14.118838553  
C 6.305280650 2.928950282 13.044646677  
H 6.228250648 3.848886659 12.476141406  
C 7.268981128 2.003814758 12.711641175  
H 7.943640940 2.203381766 11.884257671  
C 7.392973085 0.797900255 13.440718570  
H 8.163665361 0.081467541 13.172752388  
C 6.535674729 0.536016127 14.484604688  
H 6.618952606 -0.388140210 15.050208397  
C 5.520179832 1.461980120 14.841438085  
C 4.616667002 1.199582150 15.900308009

H 4.723772357 0.281110319 16.470640893  
C 3.612244230 2.082752567 16.198157213  
H 2.920085920 1.852037683 16.998987954  
C 3.457114492 3.299440469 15.473827184  
C 0.840268810 3.223480045 16.679617262  
C 0.337876308 3.439587764 17.963383699  
H 0.669072900 4.295581103 18.544789470  
C -0.584799381 2.541242863 18.526746536  
C -1.110944619 2.779432737 19.923035645  
C -0.978527401 1.430714626 17.779298200  
H -1.681106380 0.722462775 18.213501779  
C -0.483356838 1.191375468 16.487200813  
C -0.923623054 -0.026219073 15.709291083  
C 0.418702575 2.102551720 15.941753813  
H 0.820334560 1.923626397 14.948887014  
C 2.559830228 5.574125082 17.115616606  
C 3.832230865 5.548954232 17.687812827  
H 4.521973883 4.746717118 17.445486503  
C 4.236268036 6.561956487 18.570147891  
C 5.637316373 6.556077478 19.132621490  
C 3.331555619 7.579959920 18.879293539  
H 3.636956898 8.367833800 19.564889319  
C 2.041289980 7.624170413 18.329345173  
C 1.092004287 8.740381430 18.695560448  
C 1.671248424 6.617489208 17.437419879  
H 0.673410524 6.638834536 17.001695791  
P 1.859945351 4.627615974 12.397230540  
P 2.006573037 4.369869564 15.855273159  
Rh 1.010626571 5.767341941 14.110463857  
C -0.900832603 5.062440543 14.422907946  
C -1.855701034 5.741726259 13.458100279  
C -1.274058861 7.073931947 13.056554443  
C 0.059161314 7.236863693 13.092291991  
H 0.552664677 8.156611999 12.765775715  
C -2.433756002 8.020918738 12.818557081  
H -2.003447826 5.124490500 12.558826197  
C -3.242770448 6.188539472 13.970141486  
H -0.922307145 3.972176808 14.431651501  
H -1.040311797 5.434762392 15.450000812  
H -2.376903746 8.894766295 13.487231408  
H -2.491031649 8.387528294 11.786148817  
H -4.017726575 5.420045375 13.915803752  
H -3.166090520 6.544921934 15.012514139  
O -3.608154919 7.245617859 13.084080025  
H 0.140256677 8.654064630 18.163380676  
H 0.877882029 8.737347736 19.770410090  
H 1.524361631 9.718372068 18.456289675  
H 5.740389723 7.244779765 19.975340906  
H 5.926879189 5.555971139 19.472318998  
H 6.356182448 6.858029395 18.361010195  
H -1.795114585 1.986880727 20.237666416  
H -0.291574128 2.824703719 20.649640634  
H -1.648971301 3.732447538 19.985012308  
H -0.260920832 -0.216386460 14.860966117  
H -0.934081696 -0.918918970 16.343188672  
H -1.939785737 0.103105535 15.317742406  
H 3.253504547 -1.476140763 12.067684761  
H 4.074939393 -0.333435374 10.997056766  
H 4.364069538 -0.263386469 12.733486489  
H -2.058218479 1.199034368 12.681625115  
H -1.716921782 0.493787853 11.097874587

H -1.491481832 -0.474362404 12.556211988  
H 3.907877244 3.259304208 7.830036550  
H 2.601601250 3.274372227 6.634970716  
H 3.699599780 4.648451661 6.752706258  
H -0.830427878 6.954749959 7.226670413  
H -1.793736727 6.446150410 8.621294554  
H -0.756086024 7.866701831 8.741818144

=====  
15A

=====  
C 0.519968038 -0.193796466 -0.543269868  
C 0.255356174 -0.135681580 2.143967547  
C 2.675163462 0.016242759 4.332216147  
C 1.594297724 0.228848335 5.194408734  
H 0.823121445 0.945659836 4.938228848  
C 1.496110878 -0.464968629 6.405119201  
C 0.303439139 -0.255239583 7.308896575  
C 2.509686727 -1.367990085 6.741401033  
H 2.445929266 -1.908522643 7.683827696  
C 3.610416807 -1.589024487 5.905030859  
C 4.693349809 -2.563612340 6.306495973  
C 3.685255117 -0.886045447 4.698997161  
H 4.542720011 -1.044310974 4.052607364  
C 3.523727063 2.592788962 3.681365032  
C 4.772950712 2.601145425 4.305093371  
H 5.444744447 1.754608003 4.197451796  
C 5.178895500 3.703881560 5.066445655  
C 6.552256341 3.723026578 5.693144528  
C 4.285794280 4.767842886 5.226441088  
H 4.584744341 5.620597267 5.832752154  
C 3.008940577 4.760667273 4.650470347  
C 2.048375329 5.895024000 4.914183231  
C 2.641644699 3.667012692 3.862044064  
H 1.657232575 3.640202045 3.406278051  
C 4.047701001 0.218344050 1.757925679  
C 3.692288723 -1.148838124 1.529632327  
H 2.888116812 -1.597596184 2.099309583  
C 4.345854037 -1.900322710 0.587936433  
H 4.054438157 -2.934153996 0.428577287  
C 5.375215528 -1.334755682 -0.200550654  
C 6.063828348 -2.102555544 -1.176265850  
H 5.809611587 -3.153689159 -1.285279008  
C 7.029735797 -1.528209005 -1.969005351  
H 7.551647577 -2.123844947 -2.712346073  
C 7.336821753 -0.153437148 -1.826529203  
H 8.081412461 0.300029990 -2.473999353  
C 6.700346279 0.613268078 -0.879576674  
H 6.938763337 1.665565183 -0.791482409  
C 5.712388368 0.049476812 -0.024296259  
C 5.037205771 0.823921255 0.976922429  
C 5.405938019 2.264970147 1.150396336  
C 6.680126623 2.587654351 1.727606010  
C 7.585686948 1.591256504 2.190553496  
H 7.309710985 0.545541870 2.112681158  
C 8.807421044 1.935427634 2.725217423  
H 9.482730383 1.156728552 3.067713397  
C 9.195463879 3.293285998 2.829127073  
H 10.165686858 3.549326203 3.243916820  
C 8.336530467 4.282745880 2.407368860  
H 8.617301261 5.329639530 2.487910293  
C 7.066300765 3.960853385 1.858520257

C 6.169152209 4.965658705 1.423343125  
H 6.461183968 6.008621652 1.516632843  
C 4.952559891 4.640383288 0.877819481  
H 4.298399142 5.433904663 0.540268116  
C 4.551590471 3.284315805 0.733619117  
C 2.135169624 4.464578721 -0.434114138  
C 1.747965644 4.869287206 -1.716431062  
H 2.009324090 4.267758670 -2.581018095  
C 1.041505309 6.065220181 -1.919014943  
C 0.644462403 6.474709307 -3.318615815  
C 0.736833428 6.858618107 -0.811892965  
H 0.201189739 7.793928219 -0.958421746  
C 1.121965089 6.488788902 0.484778498  
C 0.776923379 7.369598340 1.662027723  
C 1.811489350 5.286193547 0.662247546  
H 2.133748194 5.005249620 1.661004560  
C 3.651866441 2.350017144 -1.756194984  
C 4.477184365 3.238757583 -2.463076935  
H 4.671020068 4.231318975 -2.064395410  
C 5.056359720 2.864914245 -3.677684210  
C 5.912286896 3.840118891 -4.452336082  
C 4.808587637 1.574556536 -4.166910466  
H 5.259919194 1.272308661 -5.109809611  
C 4.012502044 0.660836320 -3.471983564  
C 3.806673717 -0.747187196 -3.976592450  
C 3.438980098 1.063501396 -2.259415530  
H 2.841203950 0.355611149 -1.698675460  
P 2.872642915 1.099240068 2.866790295  
P 2.960347083 2.847243158 -0.126222125  
Rh 1.463948856 1.127230225 0.999979116  
C -0.102623802 2.441218774 1.484348959  
C -0.721425621 2.005517938 2.795435461  
C -0.670057429 0.502445675 2.854440206  
H 0.375112715 -1.215255168 2.124614204  
C -1.833001403 0.044805823 3.709623206  
H -0.169225062 2.432456455 3.647525150  
C -2.225614715 2.234977551 3.046617475  
H 0.314383625 3.448378850 1.471651016  
H -0.813625119 2.319499607 0.664304410  
H -2.474564750 -0.672499171 3.175016032  
H -1.517616644 -0.416111035 4.654539580  
H -2.476603567 3.213575562 3.464888396  
H -2.796124970 2.087852452 2.113144869  
O -2.555002523 1.246152736 4.023770175  
C 0.356770856 0.902179086 -1.095096809  
C 0.009836072 1.968402995 -2.030516970  
C 0.473297895 -1.659530886 -0.504596784  
H -0.216465899 2.908504635 -1.520843247  
H 0.851396098 2.144412463 -2.707995092  
H -0.859335440 1.659747053 -2.620660744  
O 1.154100145 -2.374988586 0.201504851  
O -0.420216021 -2.101128583 -1.403629063  
C -0.547940278 -3.539684315 -1.483461690  
H -1.311725065 -3.719350274 -2.238822542  
H 0.403617059 -3.990032128 -1.777000599  
H -0.853792961 -3.946200327 -0.516333980  
H 5.513004265 -2.579348365 5.582414625  
H 5.113097073 -2.305711435 7.285363338  
H 4.296637676 -3.582393994 6.384720957  
H 0.549245563 -0.464956630 8.353961843  
H -0.072684789 0.770595689 7.244766688

H -0.522142944 -0.921317358 7.028000153  
H 6.682388307 4.583818690 6.354937988  
H 6.730474747 2.814492677 6.279066089  
H 7.327424583 3.768129628 4.920952702  
H 1.131740817 5.796156606 4.318702631  
H 1.757408763 5.919960801 5.975480883  
H 2.507072707 6.868389688 4.684656272  
H 2.807596691 -1.119131803 -3.725884730  
H 3.931507820 -0.810741558 -5.061387357  
H 4.534614631 -1.424216656 -3.514673235  
H 6.584270033 3.323282909 -5.143506389  
H 5.291178479 4.521374692 -5.047210413  
H 6.520460367 4.456694368 -3.782716295  
H 0.122125421 7.435043159 -3.326226875  
H 1.523642957 6.564831920 -3.967055221  
H -0.017054977 5.729637275 -3.776117529  
H 1.544616176 7.263948460 2.478762238  
H 0.724417023 8.451231838 1.345626620  
H -0.235258570 7.082793437 2.088261834

=====

15B

=====

C 0.828553357 0.557544975 -1.204721043  
C 0.359890398 -0.373386448 1.938313809  
C 2.390896592 0.345311828 4.566581726  
C 1.122983414 0.295680553 5.147833175  
H 0.257448482 0.640217589 4.600682297  
C 0.957345620 -0.195125299 6.451509156  
C -0.423844958 -0.281511259 7.058202575  
C 2.085645844 -0.621094224 7.156007927  
H 1.966558970 -0.995233023 8.170953767  
C 3.371757612 -0.572208237 6.597812249  
C 4.571490474 -1.029147887 7.394733771  
C 3.511375462 -0.084398191 5.299322083  
H 4.503712741 -0.031650536 4.858970827  
C 3.375523100 2.753093044 3.585843965  
C 4.706656500 2.958681625 3.963711897  
H 5.454796781 2.195155345 3.784065300  
C 5.092790671 4.160466222 4.564780359  
C 6.539980688 4.388817478 4.933010473  
C 4.109377116 5.124448477 4.833894516  
H 4.400233980 6.054390586 5.317649898  
C 2.763797895 4.920349046 4.506939955  
C 1.701844330 5.947005289 4.818276984  
C 2.411514105 3.732113554 3.855696460  
H 1.377201379 3.577674318 3.557671897  
C 3.921025954 0.052611924 2.114887019  
C 3.658277585 -1.345053383 2.294944039  
H 2.976568012 -1.651092285 3.079754880  
C 4.250316454 -2.293300235 1.503855480  
H 4.057978335 -3.348457314 1.679582524  
C 5.106351747 -1.912070552 0.436426109  
C 5.678517921 -2.872774885 -0.436669838  
H 5.452814324 -3.923390102 -0.274079777  
C 6.503689870 -2.486187742 -1.469206256  
H 6.937188764 -3.229539514 -2.131190340  
C 6.787479899 -1.114041020 -1.666667162  
H 7.433301629 -0.809952641 -2.485145172  
C 6.252563627 -0.158059156 -0.831508126  
H 6.470109809 0.888370384 -1.006114043  
C 5.397054123 -0.521788141 0.246143843



C 4.824798042 0.464532475 1.129171919  
C 5.379502559 1.854228380 1.034020327  
C 6.738141023 2.015669037 1.491233924  
C 7.434893092 0.988608556 2.189603837  
H 6.947634789 0.037484940 2.369829899  
C 8.716364991 1.191536483 2.652657638  
H 9.225455527 0.398202783 3.191896871  
C 9.377640400 2.421648271 2.431194638  
H 10.390591458 2.564913841 2.795238334  
C 8.734545443 3.434437860 1.756787178  
H 9.231094068 4.385163644 1.581144808  
C 7.408696319 3.263025238 1.282268007  
C 6.732291427 4.296414538 0.585927371  
H 7.259869352 5.221361925 0.368203454  
C 5.431641445 4.134580993 0.192969166  
H 4.933483889 4.934338556 -0.342216932  
C 4.715363879 2.932676835 0.467827194  
C 2.282271265 4.545802353 0.276964489  
C 1.103906691 4.916659047 -0.386470125  
H 0.625399550 4.226588738 -1.072552516  
C 0.519995819 6.171180242 -0.171556243  
C -0.747189709 6.546129676 -0.904030543  
C 1.145370178 7.058086603 0.708536612  
H 0.709376819 8.041977765 0.871277435  
C 2.321766664 6.714350475 1.385708994  
C 3.018130760 7.720580995 2.271829262  
C 2.866333185 5.441206380 1.187368106  
H 3.752480800 5.164056127 1.745535759  
C 3.213503753 2.779987878 -1.864759769  
C 3.187672416 3.905194566 -2.697886254  
H 2.904767215 4.874066003 -2.298902849  
C 3.528759201 3.795768548 -4.050797837  
C 3.475329490 5.005201557 -4.955696566  
C 3.891070496 2.539295698 -4.553380982  
H 4.154867051 2.447519848 -5.605162455  
C 3.918915298 1.399668173 -3.742120738  
C 4.243151911 0.037592863 -4.305371497  
C 3.588509814 1.537332289 -2.390675922  
H 3.614795243 0.661439803 -1.749386836  
P 2.722158362 1.168534322 2.962965775  
P 2.940447232 2.856469586 -0.048411149  
Rh 1.576881153 1.001446861 0.944488199  
C -0.128602252 2.208624713 1.227582114  
C -0.956772137 1.644539586 2.361279709  
C -0.750674564 0.155094440 2.445668236  
H 0.591340132 -1.436580353 2.004416229  
C -1.997283283 -0.431400914 3.076876309  
H -0.655067362 2.104893976 3.317011892  
C -2.495009786 1.695895954 -2.283927767  
H 0.257113338 3.211260724 1.408454959  
H -0.636607837 2.172395003 0.265006046  
H -2.425553192 -1.235495160 2.459016363  
H -1.822991930 -0.832608747 4.084409738  
H -2.940188829 2.636327846 2.619065556  
H -2.832112442 1.486205418 1.254504201  
C -2.908807410 0.670828804 3.191874111  
O 1.047045920 -0.567280418 -0.744038808  
C 1.223113995 -2.005257357 -0.546315884  
C 0.364610079 1.468267816 -2.249941712  
H 2.120059384 -2.218599784 0.041725984  
H 0.357993626 -2.436756881 -0.035726080

H 1.325053642 -2.476739412 -1.529281777  
O -0.197447682 2.529469098 -2.059112498  
O 0.625662988 0.952984230 -3.458089729  
C 0.261375563 1.796081504 -4.576184354  
H 0.562489073 1.239765810 -5.463500438  
H -0.815629452 1.981368247 -4.577708849  
H 0.800208236 2.744573917 -4.512786664  
H 5.504066892 -0.878371784 6.843539567  
H 4.647010451 -0.479667758 8.339758529  
H 4.497576532 -2.093413648 7.645950305  
H -0.392041112 -0.181950265 8.147241879  
H -1.085046603 0.495386556 6.661851041  
H -0.888510448 -1.249980171 6.833446828  
H 6.729347207 5.435773029 5.185346032  
H 6.823438161 3.782215119 5.801397124  
H 7.205388372 4.108229551 4.109960570  
H 1.119831251 6.185530033 3.921520921  
H 1.002549497 5.568315132 5.572599264  
H 2.134758454 6.875516421 5.199019514  
H 3.319259111 -0.529963197 -4.473821767  
H 4.770108714 0.107856235 -5.261179349  
H 4.860861584 -0.542409378 -3.612294925  
H 4.209081567 4.934287734 -5.764217084  
H 2.486453541 5.101833318 -5.421003266  
H 3.665142502 5.929885521 -4.402447618  
H -1.208510651 7.442796013 -0.478102595  
H -0.542382492 6.748005347 -1.963797538  
H -1.479992824 5.731428274 -0.868337215  
H 3.690322315 7.231088512 2.980872090  
H 3.617783455 8.413092184 1.668503016  
H 2.301058211 8.323150951 2.837608416

=====

15A-TS1

=====

C 0.857199312 0.543455429 -0.879661720  
C 0.419049123 -0.448733724 1.771340067  
C 2.403631765 0.412152319 4.582879526  
C 1.101389560 0.465331477 5.083789630  
H 0.312815517 0.918249370 4.494995054  
C 0.803516909 -0.043736920 6.354984203  
C -0.611486442 -0.010672680 6.883807511  
C 1.839823705 -0.602488339 7.107887667  
H 1.620624717 -0.995525588 8.099039550  
C 3.157653858 -0.662903563 6.631035815  
C 4.251168830 -1.262664437 7.483759911  
C 3.428448505 -0.145558947 5.363363017  
H 4.447140192 -0.169585590 4.984391191  
C 3.562633882 2.789067255 3.708879985  
C 4.904818033 2.949890340 4.062475250  
H 5.627775516 2.171107308 3.846213328  
C 5.336618944 4.129745148 4.679313695  
C 6.799229846 4.316827078 5.005666917  
C 4.385619298 5.110830041 4.994359749  
H 4.711806046 6.021354653 5.491730194  
C 3.025948838 4.945568950 4.700433658  
C 1.995882834 5.970904637 5.108839214  
C 2.630689934 3.786000788 4.026845868  
H 1.585482771 3.662253153 3.750934557  
C 3.984701211 0.136861365 2.140325486  
C 3.691149218 -1.258345312 2.281569729  
H 3.041288601 -1.578289776 3.087799758

C 4.214849452 -2.186980756 1.423188689  
H 3.994637942 -3.242738286 1.561593244  
C 5.045097612 -1.791373165 0.343058935  
C 5.571164462 -2.737802926 -0.573028533  
H 5.316032120 -3.786459965 -0.443095888  
C 6.394148099 -2.339474398 -1.601807362  
H 6.795839776 -3.071995454 -2.295683364  
C 6.716521017 -0.970733861 -1.757272126  
H 7.360518539 -0.658746022 -2.574487338  
C 6.219658841 -0.028567252 -0.884383420  
H 6.464515071 1.016410916 -1.027326489  
C 5.374000488 -0.405853287 0.195645431  
C 4.849001594 0.560934449 1.125857253  
C 5.394713405 1.955663080 1.039418900  
C 6.768960443 2.120262601 1.441900056  
C 7.509398389 1.081089990 2.072287531  
H 7.037994086 0.121288777 2.249122080  
C 8.812074575 1.279391588 2.473249568  
H 9.353545872 0.473664691 2.960543395  
C 9.453054807 2.520934684 2.254791328  
H 10.483204230 2.661351556 2.568766025  
C 8.766545950 3.547940431 1.648133984  
H 9.245056240 4.508747863 1.476859722  
C 7.418219220 3.378352769 1.239289616  
C 6.698883972 4.430241208 0.618323564  
H 7.204401945 5.371021105 0.415826165  
C 5.383616980 4.267456938 0.278835370  
H 4.855691818 5.081232899 -0.203259478  
C 4.698400679 3.043152486 0.531052630  
C 2.226980156 4.614153409 0.310486079  
C 1.075416198 4.966308740 -0.410550261  
H 0.658286909 4.274451057 -1.136384088  
C 0.457050032 6.204862771 -0.206960335  
C -0.765244970 6.591207457 -1.006183268  
C 1.018861867 7.089904491 0.719328996  
H 0.556022615 8.063934348 0.869310229  
C 2.164781843 6.761651144 1.452506203  
C 2.796387864 7.772562965 2.381137932  
C 2.747846420 5.502808260 1.263204742  
H 3.618304807 5.237748363 1.850696609  
C 3.214232512 2.846667523 -1.808169650  
C 3.246528563 3.984492519 -2.624277418  
H 3.009633381 4.959939038 -2.212466347  
C 3.565670634 3.878337906 -3.980399283  
C 3.569393206 5.096008690 -4.874161816  
C 3.858731578 2.611481945 -4.505543546  
H 4.104718769 2.521504531 -5.562089196  
C 3.842109435 1.462601691 -3.709594382  
C 4.106088197 0.092948679 -4.285331340  
C 3.527347147 1.596565479 -2.350932521  
H 3.517920887 0.709662208 -1.724159715  
P 2.831623164 1.267106466 3.024525211  
P 2.928894208 2.947178222 0.005277772  
Rh 1.663300208 1.143671870 0.946069108  
C -0.076500080 2.298809221 1.155974652  
C -1.015227167 1.561134859 2.097123567  
C -0.703498335 0.099345573 2.252650339  
H 0.703096746 -1.472040749 2.004288547  
C -1.897071691 -0.493723913 2.962300009  
H -0.885730754 1.988329668 3.107259735  
C -2.529643118 1.480341700 1.859595008

H 0.258697226 3.253495909 1.557934788  
H -0.479654305 2.447093954 0.154100708  
H -2.174630528 -1.465820845 2.528854824  
H -1.732455833 -0.637355542 4.039879311  
H -3.082231403 2.393852494 2.094808598  
H -2.741790816 1.191075657 0.817001591  
O -2.951797181 0.465990525 2.785701995  
C 0.625516507 -0.565766893 -0.293239176  
C 0.387821097 -2.016107128 -0.454096363  
C 0.553771149 1.186754085 -2.164849838  
H 1.213606394 -2.593403254 -0.023005891  
H -0.545752026 -2.340606783 0.013028831  
H 0.349674745 -2.215657300 -1.530375126  
O 0.181503042 2.338189431 -2.282436955  
O 0.694397135 0.330892780 -3.192352509  
C 0.420895071 0.892852549 -4.497515340  
H 0.552581629 0.069748424 -5.199088830  
H -0.599182499 1.281096094 -4.540277817  
H 1.129029178 1.698346905 -4.706312225  
H 5.227499097 -1.195632887 6.995534254  
H 4.321526155 -0.749419452 8.449426951  
H 4.052076995 -2.319734991 7.694528793  
H -0.634023847 0.198900429 7.957935366  
H -1.214003774 0.748627427 6.375635368  
H -1.106434639 -0.978318563 6.734803836  
H 7.005305992 5.329193825 5.363371033  
H 7.120287630 3.615766450 5.784870608  
H 7.424403662 4.129931408 4.125938621  
H 1.246423318 6.112379348 4.323043467  
H 1.466703210 5.643513358 6.011715027  
H 2.451249470 6.940355189 5.326513076  
H 3.184087498 -0.501539944 -4.281197962  
H 4.472301835 0.147103065 -5.314342415  
H 4.841402938 -0.452077134 -3.684363965  
H 4.451387787 5.111211528 -5.523023358  
H 2.687680247 5.104408553 -5.526335463  
H 3.559345246 6.022239761 -4.293011723  
H -1.447279325 7.215471075 -0.420245763  
H -0.481875520 7.167277003 -1.895524430  
H -1.312162990 5.708866751 -1.349822791  
H 3.546470440 7.308315988 3.026610844  
H 3.294668761 8.561742083 1.805081594  
H 2.049560271 8.260320694 3.015537463

=====

15A-TS2

=====

C 0.205689580 1.040996453 -0.362370768  
C -0.223424589 0.697724007 2.598738743  
C 2.845236666 -0.195272670 4.373440059  
C 1.753299481 -0.044496249 5.234616146  
H 0.956926109 0.651450245 4.987824039  
C 1.687865927 -0.758761777 6.438881494  
C 0.491825542 -0.608548069 7.349687561  
C 2.742622766 -1.615223671 6.764547152  
H 2.706003365 -2.167520614 7.701457885  
C 3.856031073 -1.773096705 5.927262675  
C 4.988483141 -2.690169323 6.326267448  
C 3.897428669 -1.053854375 4.731725403  
H 4.763816421 -1.157469463 4.085468220  
C 3.748264389 2.385455666 3.788489157  
C 5.026370751 2.329306290 4.348671699

H 5.646527603 1.448503260 4.208142339  
C 5.532001426 3.413358379 5.073332692  
C 6.943070646 3.380802659 5.607207669  
C 4.712207729 4.532479652 5.259722989  
H 5.093198781 5.375012678 5.833551998  
C 3.412783428 4.596772170 4.743286724  
C 2.535320882 5.794517938 5.018348664  
C 2.942716962 3.512779310 3.995595486  
H 1.935169960 3.542558967 3.584762588  
C 4.159732486 0.121290180 1.778598223  
C 3.866450485 -1.259512220 1.556610296  
H 3.161416516 -1.763196498 2.209148885  
C 4.475001767 -1.963139484 0.550462148  
H 4.258769412 -3.019577158 0.412050898  
C 5.382423150 -1.323191718 -0.331414009  
C 5.990784872 -2.023939601 -1.404408451  
H 5.773760417 -3.082071775 -1.525656211  
C 6.831569982 -1.375106793 -2.279775950  
H 7.287621969 -1.917250921 -3.102844587  
C 7.095340644 0.004126993 -2.113031409  
H 7.741778206 0.516601611 -2.819412052  
C 6.541507645 0.703948756 -1.065788483  
H 6.746169663 1.762210541 -0.958837738  
C 5.674288303 0.065410104 -0.136783163  
C 5.070357518 0.780513612 0.957053833  
C 5.478470473 2.212150691 1.157565937  
C 6.803850427 2.471580972 1.647760197  
C 7.684527284 1.429642772 2.054100835  
H 7.349228257 0.399897815 1.997494708  
C 8.952562758 1.708670850 2.513890612  
H 9.605230100 0.895305053 2.817432607  
C 9.417749251 3.043906413 2.590627353  
H 10.423229887 3.248624113 2.945769504  
C 8.589258125 4.076604013 2.214192136  
H 8.929926427 5.107422543 2.269182667  
C 7.272866716 3.821719172 1.744950566  
C 6.409666378 4.871697448 1.351323178  
H 6.767336748 5.897039431 1.402278212  
C 5.140851635 4.609073957 0.901314615  
H 4.511988507 5.434390568 0.593880083  
C 4.650265638 3.276988662 0.811770773  
C 2.186870511 4.607356679 -0.084132223  
C 1.536633958 4.926820309 -1.279267128  
H 1.562890951 4.242010878 -2.118184404  
C 0.805889793 6.116704364 -1.404686689  
C 0.098851529 6.422166222 -2.703391156  
C 0.759290480 6.992546601 -0.318918937  
H 0.207775505 7.925842790 -0.411995967  
C 1.406479916 6.702657599 0.890738216  
C 1.336306201 7.673610618 2.047209249  
C 2.098645110 5.494093431 1.006164855  
H 2.595025996 5.257202968 1.943548825  
C 3.362704242 2.359191249 -1.535651864  
C 4.044491774 3.207529243 -2.424146261  
H 4.285569963 4.224022702 -2.124777266  
C 4.403685101 2.764938125 -3.696906320  
C 5.103891066 3.680524825 -4.673070701  
C 4.080065077 1.449206461 -4.065167501  
H 4.354294110 1.098174653 -5.058293029  
C 3.429700905 0.577473103 -3.191059362  
C 3.120200027 -0.850298638 -3.571978224

C 3.081424577 1.047626380 -1.916851431  
H 2.598195977 0.375489256 -1.220393745  
P 3.003147923 0.945384723 2.948074016  
P 2.949012772 2.953137523 0.148974190  
Rh 1.236617667 1.569823060 1.442367836  
C -0.477367025 2.865555833 0.863247110  
C -1.714692737 2.373414456 1.563881930  
C -1.446934695 1.220396220 2.490581876  
H -0.040168733 -0.222036641 3.151254961  
C -2.808256904 0.696859958 2.883914191  
H -2.083147810 3.221305875 2.170388009  
C -2.925437414 1.807392291 0.812119808  
H 0.095018897 3.577277406 1.473456786  
H -0.595186362 3.269585983 -0.138135016  
H -2.819324815 -0.399676166 2.939110583  
H -3.169392387 1.093163151 3.842609998  
H -3.562041308 2.565262169 0.346828384  
H -2.602658206 1.089196792 0.042205093  
O -3.688872624 1.163965068 1.842489855  
C 0.505587844 -0.003658881 0.321416411  
C 0.509836325 -1.472210101 0.418062339  
C -0.076166922 1.435421991 -1.745396110  
H 1.536591898 -1.845270218 0.347580774  
H 0.089629055 -1.808535546 1.370474722  
H -0.082143210 -1.888257404 -0.403664539  
O -0.268240333 2.563694888 -2.157388918  
O -0.066838975 0.338074416 -2.529386195  
C -0.246390346 0.594951497 -3.940670852  
H -0.269506694 -0.387149176 -4.411419269  
H -1.179763120 1.134013625 -4.117043354  
H 0.593611630 1.184788334 -4.316812936  
H 5.793336922 -2.685237357 5.585823331  
H 5.415604947 -2.390065089 7.289881700  
H 4.639670311 -3.723234524 6.436654448  
H 0.744295562 -0.847287986 8.386677811  
H 0.095805950 0.411606132 7.322746675  
H -0.319288511 -1.282005420 7.045827385  
H 7.078139491 4.085962712 6.432261579  
H 7.212369377 2.381562877 5.963408638  
H 7.654522635 3.646064684 4.816652119  
H 1.652399805 5.805871400 4.373421896  
H 2.186931902 5.792198929 6.057947064  
H 3.079899958 6.732278198 4.864686366  
H 2.140955666 -1.151535349 -3.185153404  
H 3.120022734 -0.988850141 -4.657150607  
H 3.868948471 -1.529717459 -3.148562079  
H 5.934986706 3.170112680 -5.171038362  
H 4.415163044 4.016107931 -5.457766960  
H 5.500388902 4.570870257 -4.177170465  
H -0.604173076 7.252382529 -2.595921048  
H 0.816242365 6.692167002 -3.487271636  
H -0.453279490 5.545208037 -3.056484128  
H 2.234757434 7.622854297 2.668340499  
H 1.224948101 8.703614471 1.695164352  
H 0.477559537 7.458310661 2.695064138

=====  
15B-TS1  
=====

C 0.249589264 -0.235437200 -0.033941156  
C 0.157059726 -0.181297861 1.964679238  
C 2.688906757 -0.065377318 4.289849300

|   |              |              |              |    |              |              |              |
|---|--------------|--------------|--------------|----|--------------|--------------|--------------|
| C | 1.575711673  | 0.173707838  | 5.105453952  | C  | 0.831932637  | 7.534610314  | 1.457352892  |
| H | 0.864821486  | 0.948269273  | 4.839266437  | C  | 1.841431298  | 5.378401272  | 0.598721583  |
| C | 1.382154529  | -0.547078192 | 6.286839201  | H  | 2.234780051  | 5.204701200  | 1.596402745  |
| C | 0.175276487  | -0.295754321 | 7.160682565  | C  | 3.594463080  | 2.292492202  | -1.680155527 |
| C | 2.331749266  | -1.513641908 | 6.639141904  | C  | 4.402833856  | 3.155171307  | -2.438896311 |
| H | 2.196246471  | -2.076442400 | 7.561003876  | H  | 4.615800438  | 4.156873641  | -2.074768373 |
| C | 3.459025696  | -1.766307617 | 5.849294571  | C  | 4.930371977  | 2.744848437  | -3.663343450 |
| C | 4.469220376  | -2.809340559 | 6.267739433  | C  | 5.784264059  | 3.669820287  | -4.498079821 |
| C | 3.630214524  | -1.030234338 | 4.670850072  | C  | 4.640989604  | 1.448498424  | -4.115805669 |
| H | 4.509183326  | -1.210726069 | 4.058888981  | H  | 5.043803509  | 1.122606019  | -5.072837714 |
| C | 3.658931834  | 2.512046575  | 3.751629406  | C  | 3.864596459  | 0.561588772  | -3.368896239 |
| C | 4.853840740  | 2.461533859  | 4.472146941  | C  | 3.598474699  | -0.847279532 | -3.841263473 |
| H | 5.474297727  | 1.570147386  | 4.440030230  | C  | 3.352461593  | 0.996711160  | -2.138769041 |
| C | 5.270223470  | 3.560887915  | 5.232510905  | H  | 2.768939427  | 0.305660014  | -1.539187810 |
| C | 6.593748361  | 3.525086265  | 5.958091903  | P  | 2.961899323  | 1.069684317  | 2.883080517  |
| C | 4.447232323  | 4.691687538  | 5.279676127  | P  | 2.950740768  | 2.877998500  | -0.061701998 |
| H | 4.757993798  | 5.545072110  | 5.879451892  | Rh | 1.517020344  | 1.255725272  | 0.987581131  |
| C | 3.230384231  | 4.755572690  | 4.588850368  | C  | -0.027412699 | 2.606061409  | 1.448769611  |
| C | 2.359564952  | 5.986321901  | 4.681088555  | C  | -0.714592279 | 2.051389219  | 2.677006839  |
| C | 2.847936045  | 3.653256851  | 3.821219676  | C  | -0.685812277 | 0.548304014  | 2.704481197  |
| H | 1.905785756  | 3.671889779  | 3.281447667  | H  | 0.301228387  | -1.243311765 | 2.116837909  |
| C | 4.119624510  | 0.210068678  | 1.736953795  | C  | -1.753344786 | 0.126728630  | 3.690774887  |
| C | 3.776830394  | -1.149338674 | 1.443445305  | H  | -0.159521334 | 2.386467082  | 3.570849391  |
| H | 2.985379355  | -1.637284243 | 2.000782756  | C  | -2.204736076 | 2.300434527  | 2.966994133  |
| C | 4.424167694  | -1.839100029 | 0.450567117  | H  | 0.426226283  | 3.583678414  | 1.597503439  |
| H | 4.149272968  | -2.869613891 | 0.243617049  | H  | -0.687670160 | 2.646645034  | 0.580413815  |
| C | 5.435959890  | -1.219262027 | -0.325816144 | H  | -2.397405227 | -0.653741366 | 3.258290022  |
| C | 6.117495664  | -1.919847253 | -1.354949640 | H  | -1.346827570 | -0.251834879 | 4.637209215  |
| H | 5.879173262  | -2.968010004 | -1.516517727 | H  | -2.433398089 | 3.283230223  | 3.387763266  |
| C | 7.056771160  | -1.286045494 | -2.136497027 | H  | -2.807527649 | 2.148576494  | 2.055993386  |
| H | 7.569434149  | -1.832720114 | -2.922562433 | O  | -2.503180359 | 1.319412846  | 3.967744299  |
| C | 7.350737223  | 0.082338459  | -1.923729055 | C  | 0.387191339  | 0.831038946  | -0.742442048 |
| H | 8.078130773  | 0.581699343  | -2.556647842 | C  | 0.034423483  | 1.481645161  | -2.019022335 |
| C | 6.722669792  | 0.783119493  | -0.919795954 | C  | 0.233105183  | -1.692038550 | -0.284802592 |
| H | 6.950740182  | 1.831720569  | -0.771535125 | H  | -0.354409355 | 2.492668918  | -1.843440916 |
| C | 5.757074106  | 0.156524625  | -0.082577523 | H  | 0.920435998  | 1.587852994  | -2.652549085 |
| C | 5.080303311  | 0.865089885  | 0.964804211  | H  | -0.717297073 | 0.891223172  | -2.551481384 |
| C | 5.413660073  | 2.306779073  | 1.184128933  | O  | 0.829599882  | -2.533960297 | 0.356979699  |
| C | 6.667893865  | 2.631610788  | 1.796089930  | O  | -0.492948588 | -1.947541512 | -1.387485827 |
| C | 7.562932335  | 1.631924129  | 2.271683621  | C  | -0.537571885 | -3.337932829 | -1.781655137 |
| H | 7.295521124  | 0.586326126  | 2.166969023  | H  | -1.182827651 | -3.368808146 | -2.658759032 |
| C | 8.760620706  | 1.979027441  | 2.856686428  | H  | 0.465678680  | -3.697711691 | -2.023972225 |
| H | 9.431245059  | 1.201960289  | 3.211869916  | H  | -0.950023653 | -3.948027278 | -0.974278602 |
| C | 9.131058583  | 3.339358027  | 2.997933216  | H  | 5.362054475  | -2.783758569 | 5.636545885  |
| H | 10.082976284 | 3.596166758  | 3.453013873  | H  | 4.784750637  | -2.659510132 | 7.306024767  |
| C | 8.282106511  | 4.330009514  | 2.558020856  | H  | 4.043488295  | -3.817403344 | 6.202291589  |
| H | 8.552323731  | 5.377494765  | 2.663804551  | H  | 0.460609333  | -0.199903421 | 8.213663064  |
| C | 7.036553762  | 4.006105528  | 1.956982888  | H  | -0.352731627 | 0.616488448  | 6.867744426  |
| C | 6.148092540  | 5.007924047  | 1.496247261  | H  | -0.536590280 | -1.127671120 | 7.096335200  |
| H | 6.433226390  | 6.051947695  | 1.598302438  | H  | 6.644251095  | 4.284664556  | 6.743375929  |
| C | 4.945061593  | 4.679403082  | 0.922022374  | H  | 6.770210141  | 2.547007941  | 6.417270076  |
| H | 4.298364568  | 5.471565573  | 0.567220815  | H  | 7.415775056  | 3.709028856  | 5.256944295  |
| C | 4.552083967  | 3.321625132  | 0.770820512  | H  | 1.425693463  | 5.862320705  | 4.125070808  |
| C | 2.102648444  | 4.458385298  | -0.431643107 | H  | 2.101551262  | 6.212856318  | 5.721665996  |
| C | 1.597732120  | 4.707491174  | -1.713448988 | H  | 2.876531124  | 6.867103892  | 4.281187660  |
| H | 1.801138582  | 4.014907572  | -2.523707528 | H  | 2.613941898  | -1.197609857 | -3.513172169 |
| C | 0.845038024  | 5.859205503  | -1.979700361 | H  | 3.640815731  | -0.922218106 | -4.931620525 |
| C | 0.282988567  | 6.098743640  | -3.361284492 | H  | 4.347028026  | -1.533109367 | -3.428826819 |
| C | 0.616429820  | 6.763890487  | -0.940284286 | H  | 6.707146939  | 3.173386367  | -4.817153261 |
| H | 0.047512493  | 7.669310984  | -1.141076229 | H  | 5.255242339  | 3.979964203  | -5.406975299 |
| C | 1.108373691  | 6.542707730  | 0.352465670  | H  | 6.059091370  | 4.573510030  | -3.947074721 |

H 0.124352205 7.163815415 -3.552314900  
H 0.947457781 5.707601917 -4.137961281  
H -0.685780468 5.597820092 -3.478203715  
H 1.583248516 7.475488300 2.249036677  
H 0.816705975 8.560884657 1.077563757  
H -0.146438823 7.344868873 1.916052627

=====  
15B-TS2  
=====

C 0.676159234 -0.133637652 0.187531126  
C -0.282266704 0.841175458 2.547241191  
C 2.733108732 -0.457650310 4.088948261  
C 1.670886773 -0.220391376 4.973011882  
H 0.974830598 0.589162433 4.779071792  
C 1.511051482 -0.989752081 6.128304843  
C 0.350219291 -0.746682428 7.063263960  
C 2.443904426 -1.999015778 6.395440929  
H 2.332068641 -2.600218618 7.295531192  
C 3.529688802 -2.237104248 5.546990997  
C 4.525593569 -3.329824927 5.858549745  
C 3.670778692 -1.451496101 4.395780594  
H 4.529152032 -1.618528760 3.753156212  
C 3.587099092 2.166424101 3.675851771  
C 4.829292631 2.112667226 4.313249361  
H 5.472734233 1.247045218 4.179985833  
C 5.264350634 3.173531302 5.112793940  
C 6.635022075 3.143138210 5.743312704  
C 4.416714934 4.276182976 5.279121497  
H 4.745985116 5.103387825 5.904763805  
C 3.155216666 4.341355214 4.677630266  
C 2.272406828 5.553544551 4.859025170  
C 2.746892067 3.268289491 3.878420448  
H 1.752774745 3.283085222 3.434187384  
C 4.226245748 0.057400510 1.580736959  
C 4.018079865 -1.314536609 1.243713886  
H 3.266240858 -1.883972440 1.774879226  
C 4.747550855 -1.925124370 0.257939477  
H 4.585534737 -2.976233944 0.031558443  
C 5.710009979 -1.200675373 -0.486095665  
C 6.455956996 -1.812632945 -1.526091137  
H 6.302615089 -2.870548301 -1.723872044  
C 7.350544162 -1.081289227 -2.273002040  
H 7.915174590 -1.556216294 -3.070075707  
C 7.528500818 0.296103761 -2.006675003  
H 8.220347889 0.875303237 -2.611488080  
C 6.834977909 0.911495660 -0.990045671  
H 6.980082071 1.968955625 -0.807608041  
C 5.913419524 0.184623305 -0.185623261  
C 5.170841164 0.807836127 0.880181878  
C 5.450091620 2.257318386 1.158623523  
C 6.710075197 2.615700303 1.746825201  
C 7.659989892 1.642917422 2.167710809  
H 7.423250707 0.590312648 2.058072435  
C 8.872602919 2.018349133 2.702015257  
H 9.582364476 1.256700434 3.011692176  
C 9.206588734 3.386662326 2.849070105  
H 10.170586554 3.668172751 3.262000818  
C 8.302938213 4.353665303 2.470675963  
H 8.541795239 5.408030953 2.584137562  
C 7.041741263 3.998868154 1.921398969  
C 6.101924297 4.981478941 1.526631721

H 6.352928854 6.031654970 1.653059902  
C 4.894685950 4.623766709 0.980575535  
H 4.201417768 5.398584626 0.677060696  
C 4.554304113 3.257446480 0.786595324  
C 2.088768299 4.374734486 -0.350325275  
C 1.660253176 4.734903967 -1.633955571  
H 1.952881885 4.143106812 -2.495513081  
C 0.849702032 5.863967620 -1.826524634  
C 0.425447953 6.266598916 -3.219543090  
C 0.467121740 6.616176212 -0.711720697  
H -0.169029985 7.487512306 -0.853178480  
C 0.876857173 6.276474871 0.584910961  
C 0.465360049 7.117023651 1.770527040  
C 1.682267248 5.147197855 0.751991743  
H 2.002822099 4.868311072 1.752817088  
C 3.518960637 2.174256155 -1.630191039  
C 4.306081933 2.998058875 -2.451760063  
H 4.539462300 4.011941786 -2.136391723  
C 4.799530816 2.527862384 -3.669579583  
C 5.647860555 3.403714855 -4.561357894  
C 4.501983951 1.209549230 -4.046194303  
H 4.887516470 0.832603882 -4.991868698  
C 3.745309516 0.361475176 -3.234563291  
C 3.491922097 -1.075333835 -3.623123079  
C 3.258013998 0.859164145 -2.019102510  
H 2.697193309 0.203327232 -1.365655266  
P 2.949450268 0.743633183 2.719609290  
P 2.947180860 2.790298766 -0.005124862  
Rh 1.199954324 1.460206347 1.287582684  
C -0.642506535 2.527488962 0.320572338  
C -1.018033250 3.030198670 1.711273241  
C -1.145735881 1.843989922 2.668877906  
H -0.298867864 -0.113688596 3.062446903  
C -2.380359975 2.082831351 3.521716169  
H -0.304707447 3.783478754 2.069275111  
C -2.447814447 3.632803427 1.823883050  
H -0.286467872 3.281075887 -0.378368262  
H -1.496796761 1.979346119 -0.072679989  
H -3.159721640 1.336407048 3.295631704  
H -2.187429279 2.064818766 4.598512202  
H -2.489592167 4.708423177 1.635028494  
H -3.130949503 3.117007905 1.126690926  
O -2.815783178 3.400219899 3.174473891  
C 0.194135242 0.732557311 -0.627490261  
C -0.140501451 1.022113558 -2.034344046  
C 0.866263794 -1.574765220 0.361376722  
H -1.148757628 1.425590461 -2.163637569  
H 0.576361417 1.740595890 -2.446440886  
H -0.052743000 0.088757481 -2.599874085  
O 0.960947941 -2.138945510 1.432122231  
O 0.938469733 -2.187159500 -0.838980940  
C 1.135062143 -3.618407573 -0.785775016  
H 1.145071458 -3.949448358 -1.823458591  
H 2.084909058 -3.848435925 -0.296675072  
H 0.322983973 -4.095474017 -0.231651419  
H 5.477372456 -3.165956086 5.344580382  
H 4.726275002 -3.393325448 6.932792659  
H 4.143717655 -4.307855150 5.541088462  
H 0.662750969 -0.805054196 8.110829128  
H -0.099368016 0.236948690 6.898403948  
H -0.433273801 -1.499745771 6.916165181

H 6.683555947 3.780088684 6.631162259  
H 6.919469988 2.127265834 6.034245205  
H 7.387216579 3.501280281 5.031104732  
H 1.215541728 5.306621047 4.716766222  
H 2.384853282 5.989495763 5.856453337  
H 2.530410242 6.334924268 4.132650125  
H 2.656511875 -1.498745847 -3.056762119  
H 3.272842034 -1.172458329 -4.691353267  
H 4.379435731 -1.682620464 -3.410988482  
H 6.617175470 2.933560685 -4.763629169  
H 5.163059004 3.570109906 -5.530497329  
H 5.836021442 4.380995943 -4.107948447  
H -0.484281746 6.873884589 -3.204295110  
H 1.208943335 6.860631331 -3.706819410  
H 0.242051974 5.391932860 -3.852239235  
H 0.385542785 6.517635631 2.681635106  
H 1.202657239 7.905371437 1.963583188  
H -0.496523272 7.608393161 1.599090259

=====

16A

=====

C 2.399611877 6.270557399 11.432043708  
C 2.467306404 7.562929484 11.980067909  
H 2.707658895 7.694291460 13.033957200  
C 2.238228592 8.694379380 11.191620371  
C 2.325247772 10.076007239 11.796014822  
C 1.940806101 8.509300138 9.835818897  
H 1.749475250 9.380192452 9.211839755  
C 1.884976373 7.234103847 9.258182771  
C 1.574597875 7.073395737 7.788182904  
C 2.118168251 6.116072821 10.070277970  
H 2.063341586 5.124244517 9.633260452  
C 2.506768215 3.314336977 11.721845417  
C 3.399183643 3.069716263 10.669133652  
H 4.083559434 3.849385568 10.343473966  
C 3.419619444 1.824046329 10.033018162  
C 4.392489937 1.542736974 8.912185132  
C 2.549631844 0.825202735 10.489083519  
H 2.566150190 -0.148418438 10.002893664  
C 1.672822613 1.033410295 11.559114306  
C 0.806206038 -0.085724712 12.082293127  
C 1.657998713 2.293509284 12.162976250  
H 1.006378882 2.471458074 13.009113477  
C 4.216739275 5.006656706 13.285793473  
C 5.168070749 5.881092846 12.691741111  
H 4.866255729 6.528296975 11.877380905  
C 6.470890475 5.898648473 13.121217101  
H 7.194314960 6.557604362 12.648195075  
C 6.900055203 5.040767673 14.164402480  
C 8.257671415 5.000184582 14.578648860  
H 8.972098907 5.653502131 14.084500682  
C 8.666643234 4.143360588 15.574763806  
H 9.709893735 4.111606811 15.874941744  
C 7.723059062 3.307139868 16.217241453  
H 8.047392362 2.643462830 17.013525944  
C 6.399193305 3.326351312 15.840916916  
H 5.690341146 2.676208216 16.341042686  
C 5.946099630 4.174967688 14.792195536  
C 4.585807245 4.170622008 14.331631269  
C 3.639651510 3.161727976 14.918929739  
C 3.875451551 1.789412690 14.560341726

C 4.837560264 1.425245697 13.573672336  
H 5.403477860 2.198765199 13.070389404  
C 5.031289759 0.108301758 13.229503946  
H 5.758378127 -0.145377925 12.463428895  
C 4.292910218 -0.922118290 13.860050861  
H 4.468895708 -1.958560638 13.586706442  
C 3.351091614 -0.607212891 14.810915770  
H 2.773578041 -1.387545749 15.298865132  
C 3.110341102 0.744792886 15.171744522  
C 2.132370601 1.095708296 16.130967491  
H 1.574991313 0.309280383 16.633686645  
C 1.876192734 2.412140659 16.422475811  
H 1.119649388 2.642327015 17.160361013  
C 2.598718987 3.472139781 15.802996955  
C 1.015853842 5.175244530 17.632152885  
C 1.570051687 5.831613899 18.735470327  
H 2.499429718 6.381008883 18.637248913  
C 0.933983195 5.802320841 19.985939304  
C 1.564757530 6.508557737 21.162814815  
C -0.272110445 5.111213784 20.111091666  
H -0.772193680 5.084312573 21.077186217  
C -0.864006289 4.460968836 19.018521043  
C -2.184629982 3.745508840 19.175565059  
C -0.211738173 4.506608343 17.787539551  
H -0.666412781 3.998102060 16.949638675  
C 3.232425672 6.380527509 16.224511885  
C 4.411548661 6.041043949 16.895194845  
H 4.561751193 5.027440365 17.255211135  
C 5.410831245 6.998148485 17.104386444  
C 6.699936299 6.619170635 17.791146475  
C 5.197183888 8.297669432 16.631756009  
H 5.968167786 9.049093996 16.792184832  
C 4.014936582 8.666466352 15.977760277  
C 3.810935089 10.079424052 15.485783790  
C 3.029711974 7.695296605 15.782647651  
H 2.078832415 7.981737765 15.344422234  
P 2.498615518 4.891730770 12.636325293  
P 1.886554781 5.175019058 16.009462475  
Rh 0.676117309 5.649630193 14.100825457  
H -0.008867817 0.293836582 12.706311218  
H 0.368839061 -0.671578454 11.267791220  
H 1.404188498 -0.766851166 12.699400557  
H 3.972658486 0.843221927 8.182911672  
H 4.676189399 2.457543749 8.383653567  
H 5.311940365 1.090996759 9.304188753  
H 1.485773890 6.020495838 7.506607153  
H 0.636221069 7.574308799 7.524952312  
H 2.361358491 7.520433907 7.169620634  
H 1.702263703 10.792707039 11.253003544  
H 2.010444752 10.072748542 12.844418348  
H 3.355606631 10.450334240 11.767528967  
H 0.890004183 6.543716463 22.022248071  
H 2.482504791 5.998834349 21.479332818  
H 1.838542935 7.536652968 20.902918433  
H -2.510370337 3.286761328 18.237684973  
H -2.120698221 2.956793519 19.933737707  
H -2.969799728 4.438735539 19.498540087  
H 2.754551020 10.283314835 15.287672324  
H 4.166021159 10.812920969 16.216657454  
H 4.366375954 10.253264088 14.556149049  
H 7.167690122 7.482684813 18.272990677

|   |              |             |              |   |              |              |              |
|---|--------------|-------------|--------------|---|--------------|--------------|--------------|
| H | 6.538081991  | 5.848808761 | 18.551241544 | C | 7.395168507  | 7.279048037  | 13.996473743 |
| H | 7.411421757  | 6.211634693 | 17.065004441 | H | 7.764057194  | 8.131344670  | 13.431353499 |
| C | -0.766134585 | 4.171265832 | 14.325359344 | C | 8.060971883  | 6.838089419  | 15.116222437 |
| C | -0.655539124 | 6.984624585 | 14.816562829 | H | 8.964975569  | 7.340023499  | 15.448776967 |
| C | -1.671483437 | 4.508373277 | 13.156100720 | C | 7.562717460  | 5.728816915  | 15.839811286 |
| C | -1.115373214 | 7.585939987 | 13.692540030 | H | 8.080168893  | 5.395401329  | 16.734700879 |
| C | -0.976561454 | 5.519302054 | 12.226490427 | C | 6.428033389  | 5.070829023  | 15.425774989 |
| C | -0.820303559 | 6.860850772 | 12.436815500 | H | 6.054161276  | 4.233714969  | 16.001676721 |
| H | -0.472184175 | 7.458381354 | 11.592225739 | C | 5.715759051  | 5.495031680  | 14.268854010 |
| C | -0.828358509 | 4.827418722 | 10.884891335 | C | 4.523566786  | 4.830832237  | 13.816107542 |
| C | -1.794149921 | 8.929853300 | 13.596107933 | C | 4.175757031  | 3.533013234  | 14.475122513 |
| C | -1.980775418 | 3.347958234 | 12.170388104 | C | 5.062829198  | 2.424863468  | 14.225116152 |
| H | -2.592665294 | 4.973236344 | 13.525173869 | C | 6.138554077  | 2.507061278  | 13.294776167 |
| C | -0.824473304 | 7.497780199 | 16.189347063 | H | 6.293509806  | 3.423858699  | 12.738023661 |
| H | -0.260814975 | 3.206483464 | 14.269488051 | C | 6.982116526  | 1.438986087  | 13.088330015 |
| H | -1.266190478 | 4.294757845 | 15.280117154 | H | 7.794025275  | 1.526533232  | 12.371989171 |
| O | -1.922828559 | 3.916261420 | 10.866442352 | C | 6.805338898  | 0.230089719  | 13.802269916 |
| H | -0.916227235 | 5.508450920 | 10.034843407 | H | 7.486707227  | -0.599479759 | 13.637565326 |
| H | 0.125684071  | 4.286582864 | 10.807132167 | C | 5.765353476  | 0.107451785  | 14.694236713 |
| H | -1.230886890 | 2.548087195 | 12.275772849 | H | 5.610775753  | -0.818636064 | 15.241731483 |
| H | -2.975222270 | 2.917768934 | 12.309547987 | C | 4.869245364  | 1.186286733  | 14.915798348 |
| H | -1.235456580 | 9.592559756 | 12.922595277 | C | 3.785023017  | 1.079867430  | 15.817039449 |
| H | -2.806608221 | 8.833401514 | 13.186103709 | H | 3.637290545  | 0.149698848  | 16.359899915 |
| H | -1.862021046 | 9.415992856 | 14.572399330 | C | 2.927595435  | 2.130495183  | 16.016207420 |
| O | 0.012220313  | 8.147597524 | 16.790847517 | H | 2.123222970  | 2.007117137  | 16.725995968 |
| O | -2.013335001 | 7.141111988 | 16.713474074 | C | 3.099784672  | 3.375411995  | 15.341702149 |
| C | -2.250052841 | 7.595334920 | 18.063702374 | C | 0.780637933  | 4.013585652  | 16.901928172 |
| H | -3.231740730 | 7.206621339 | 18.333749470 | C | 0.544913536  | 4.422305984  | 18.214659840 |
| H | -1.481386504 | 7.205401997 | 18.732335880 | H | 1.138969269  | 5.216554686  | 18.656118286 |
| H | -2.244950147 | 8.687615527 | 18.103885221 | C | -0.459096112 | 3.807718218  | 18.984605717 |

=====

16B

=====

|   |              |              |              |    |              |              |              |
|---|--------------|--------------|--------------|----|--------------|--------------|--------------|
| C | 1.788798589  | 5.460072192  | 10.626412085 | C  | -1.990847721 | 2.303434006  | 18.998213768 |
| C | 1.608926134  | 6.827327555  | 10.374228283 | C  | -0.992084473 | 2.351069497  | 17.090846512 |
| H | 1.626908070  | 7.533302429  | 11.199831213 | C  | -1.819473443 | 1.233764079  | 16.499587425 |
| C | 1.404836451  | 7.306797632  | 9.074966811  | C  | 0.004346364  | 2.976679758  | 16.347717681 |
| C | 1.235238764  | 8.787833745  | 8.828631735  | H  | 0.189213651  | 2.648362283  | 15.327273981 |
| C | 1.373819104  | 6.382603068  | 8.026412427  | C  | 3.155692255  | 5.810669738  | 16.794774579 |
| H | 1.206911033  | 6.738577608  | 7.011684277  | C  | 3.762788958  | 5.253012117  | 17.928864241 |
| C | 1.548558730  | 5.009411836  | 8.245650332  | H  | 3.493373690  | 4.250983987  | 18.253505718 |
| C | 1.507483138  | 4.041579323  | 7.086505042  | C  | 4.725295057  | 5.971040155  | 18.645569685 |
| C | 1.754387980  | 4.558151195  | 9.553482795  | C  | 5.351488262  | 5.381439844  | 19.887646529 |
| H | 1.883448062  | 3.495714938  | 9.732232686  | C  | 5.088257304  | 7.243925229  | 18.186865251 |
| C | 1.762775342  | 3.097902266  | 12.249634418 | H  | 5.848653982  | 7.802417908  | 18.728837083 |
| C | 2.743391406  | 2.139073045  | 11.997182271 | C  | 4.520952958  | 7.810841317  | 17.040922261 |
| H | 3.777975816  | 2.436230011  | 11.861528020 | C  | 4.983657846  | 9.147335909  | 16.513343775 |
| C | 2.404306401  | 0.779192408  | 11.918296798 | C  | 3.543383068  | 7.081983490  | 16.355408209 |
| C | 3.484274518  | -0.251584568 | 11.688932479 | H  | 3.092719319  | 7.512225640  | 15.464595336 |
| C | 1.063396089  | 0.415181911  | 12.069352620 | P  | 2.049949110  | 4.893730672  | 12.355897124 |
| H | 0.791956461  | -0.636986677 | 12.007550645 | P  | 1.995840181  | 4.810198972  | 15.792503622 |
| C | 0.052835097  | 1.367383144  | 12.275762483 | Rh | 0.857713915  | 6.088720484  | 14.194080964 |
| C | -1.392900719 | 0.943966494  | 12.390667728 | H  | -2.050875455 | 1.803768480  | 12.546614229 |
| C | 0.416285184  | 2.711198257  | 12.367959998 | H  | -1.726269527 | 0.429235014  | 11.482489968 |
| H | -0.357347146 | 3.466765076  | 12.479046849 | H  | -1.537918064 | 0.246267794  | 13.224188849 |
| C | 3.815124191  | 5.340588968  | 12.725705766 | H  | 3.063475311  | -1.236103779 | 11.466323326 |
| C | 4.352885981  | 6.452423496  | 12.012280757 | H  | 4.135620239  | 0.036615250  | 10.856461813 |
| H | 3.851061495  | 6.812468343  | 11.124598797 | H  | 4.123940724  | -0.346697923 | 12.574214406 |
| C | 5.515069233  | 7.065094128  | 12.403585583 | H  | 1.714468609  | 3.017414925  | 7.408615582  |
| H | 5.911924464  | 7.896577739  | 11.826298819 | H  | 0.523653122  | 4.049571361  | 6.603250511  |
| C | 6.212185097  | 6.629882571  | 13.554586300 | H  | 2.244579910  | 4.311475104  | 6.321852872  |
|   |              |              |              | H  | 0.804588323  | 8.986022713  | 7.843520277  |

|       |              |              |              |   |              |              |              |
|-------|--------------|--------------|--------------|---|--------------|--------------|--------------|
| H     | 0.583382828  | 9.246471070  | 9.580748758  | C | 4.440207528  | 4.144434566  | 4.781276119  |
| H     | 2.200331134  | 9.306619899  | 8.877777339  | C | 5.608461676  | 4.121448669  | 5.737218024  |
| H     | -1.571700903 | 3.776118915  | 20.844853209 | C | 3.724448183  | 5.326195577  | 4.540372497  |
| H     | 0.170551452  | 4.009474895  | 21.041534709 | H | 4.000159955  | 6.226634907  | 5.085403966  |
| H     | -0.832519105 | 5.340081082  | 20.465210381 | C | 2.666854876  | 5.382809743  | 3.627778961  |
| H     | -1.563373923 | 1.057501885  | 15.450917401 | C | 1.930861514  | 6.669726320  | 3.345373997  |
| H     | -1.664400433 | 0.296273537  | 17.046144055 | C | 2.320998083  | 4.215650632  | 2.939671346  |
| H     | -2.889713280 | 1.463501325  | 16.552927013 | H | 1.493531149  | 4.226274400  | 2.239710961  |
| H     | 4.155020341  | 9.712448168  | 16.074014152 | C | 3.707739629  | 0.698668404  | 1.237786349  |
| H     | 5.433437340  | 9.758487499  | 17.301217676 | C | 3.361276537  | -0.631428934 | 0.837472515  |
| H     | 5.740160727  | 9.000171563  | 15.732532161 | H | 2.464863596  | -1.092818187 | 1.236896686  |
| H     | 6.286475653  | 5.887408224  | 20.144268247 | C | 4.142746062  | -1.328184822 | -0.047850383 |
| H     | 4.679413535  | 5.475637814  | 20.749396784 | H | 3.869128584  | -2.339269899 | -0.337166397 |
| H     | 5.565628411  | 4.315285902  | 19.758279617 | C | 5.313508505  | -0.746542704 | -0.590795157 |
| C     | -1.013425730 | 5.266893563  | 14.645824722 | C | 6.155074445  | -1.471996180 | -1.472422849 |
| C     | 0.264931626  | 7.578179086  | 15.450262365 | H | 5.895464212  | -2.499509669 | -1.712928646 |
| C     | -1.947511764 | 6.208947429  | 13.920412007 | C | 7.282432770  | -0.891210809 | -2.004174528 |
| C     | -0.015966159 | 8.540985841  | 14.524970677 | H | 7.926876921  | -1.457234289 | -2.670221852 |
| C     | -1.086097319 | 6.961689995  | 12.897498625 | C | 7.603643902  | 0.448843692  | -1.685865100 |
| C     | -0.268020147 | 8.030019718  | 13.156897265 | H | 8.490982942  | 0.905294223  | -2.114535235 |
| H     | 0.137472288  | 8.586017142  | 12.314764900 | C | 6.798437860  | 1.184301880  | -0.847815019 |
| C     | -1.489873403 | 6.431357663  | 11.533971701 | H | 7.054758340  | 2.212794456  | -0.626936990 |
| C     | -0.021889261 | 10.001448975 | 14.796348628 | C | 5.637662090  | 0.610757998  | -0.256483599 |
| C     | -2.955991067 | 5.496195236  | 12.998776382 | C | 4.794609683  | 1.345716522  | 0.643913061  |
| H     | -2.412849742 | 6.915089487  | 14.616066960 | C | 5.056604076  | 2.809134666  | 0.838647233  |
| C     | 0.244786639  | 7.717376754  | 16.933366338 | C | 6.196540011  | 3.231451311  | 1.591945912  |
| H     | -0.979656190 | 4.269894405  | 14.210014235 | C | 7.051230806  | 2.308811192  | 2.255498750  |
| H     | -1.160960058 | 5.222010371  | 15.721277391 | H | 6.833563450  | 1.247634950  | 2.194798647  |
| O     | -2.226576703 | 5.240245239  | 11.798163423 | C | 8.149289084  | 2.744985857  | 2.961604884  |
| H     | -2.128969130 | 7.184914924  | 11.038979178 | H | 8.792819456  | 2.024584194  | 3.458225727  |
| H     | -0.662326064 | 6.191292904  | 10.869295791 | C | 8.450058364  | 4.126229977  | 3.045122936  |
| H     | -3.311144304 | 4.540367987  | 13.392534768 | H | 9.324597399  | 4.455166515  | 3.598844842  |
| H     | -3.823398655 | 6.145513949  | 12.796871713 | C | 7.631067679  | 5.047108302  | 2.432889481  |
| O     | 0.207009608  | 10.520902224 | 15.872582016 | H | 7.847656193  | 6.110027268  | 2.500292112  |
| O     | -0.291033186 | 10.707621114 | 13.670821418 | C | 6.489294902  | 4.629835758  | 1.699515216  |
| C     | -0.284124519 | 12.140195577 | 13.831853665 | C | 5.630361366  | 5.559977739  | 1.066562293  |
| H     | 0.694008218  | 12.482175052 | 14.181104169 | H | 5.855206252  | 6.620727191  | 1.143392019  |
| H     | -1.042414908 | 12.446100340 | 14.557299822 | C | 4.525680115  | 5.138880532  | 0.368254378  |
| H     | -0.507159398 | 12.548374482 | 12.846158332 | H | 3.878040394  | 5.870744978  | -0.100208166 |
| H     | -0.256712695 | 6.850695534  | 17.378042284 | C | 4.222386824  | 3.757261100  | 0.244792524  |
| H     | 1.260573332  | 7.736869045  | 17.340046914 | C | 1.971799427  | 4.808090053  | -1.260556696 |
| H     | -0.258339955 | 8.636313714  | 17.241662673 | C | 2.250503166  | 5.342511255  | -2.524564110 |
| ===== |              |              |              |   |              |              |              |
| 18A   |              |              |              |   |              |              |              |
| ===== |              |              |              |   |              |              |              |
| C     | -1.276964682 | 3.153338386  | 1.733763441  | C | 2.019603098  | 7.135983577  | -4.283110512 |
| C     | -0.087609886 | 0.212182111  | 1.313408686  | C | 0.830678991  | 7.230649739  | -2.044102596 |
| C     | 2.268687487  | 0.403413582  | 3.819514633  | H | 0.382583029  | 8.171973319  | -2.354336733 |
| C     | 1.546829315  | 0.927793405  | 4.901433762  | C | 0.525574103  | 6.714141852  | -0.778877590 |
| H     | 1.142429094  | 1.933224913  | 4.854101643  | C | -0.423445835 | 7.417333753  | 0.161878996  |
| C     | 1.361467853  | 0.188175981  | 6.073630745  | C | 1.105931465  | 5.500039882  | -0.400398402 |
| C     | 0.532099919  | 0.755103593  | 7.200822963  | H | 0.842348766  | 5.073868119  | 0.560548241  |
| C     | 1.942641509  | -1.079785185 | 6.159613574  | C | 3.375798660  | 2.345527195  | -2.096219170 |
| H     | 1.815293733  | -1.661228472 | 7.070339490  | C | 4.538958835  | 2.799118895  | -2.734922639 |
| C     | 2.706146231  | -1.612243529 | 5.113939101  | H | 5.014227366  | 3.718741995  | -2.403090324 |
| C     | 3.349202476  | -2.972265726 | 5.252701305  | C | 5.130233730  | 2.056276239  | -3.759800748 |
| C     | 2.861847261  | -0.862443276 | 3.944883193  | C | 6.386177260  | 2.540641004  | -4.444099399 |
| H     | 3.480660709  | -1.267863466 | 3.154668448  | C | 4.542050696  | 0.838656811  | -4.123009527 |
| C     | 3.024063893  | 3.029437661  | 3.158252237  | H | 5.013844130  | 0.236450456  | -4.896749617 |
| C     | 4.069387741  | 2.989425610  | 4.091248636  | C | 3.384791912  | 0.358363449  | -3.502639022 |
| H     | 4.599293262  | 2.060388689  | 4.281857460  | C | 2.833009766  | -1.002019803 | -3.853084578 |
|       |              |              |              | C | 2.799480568  | 1.131946453  | -2.493463630 |



H 1.911881474 0.755689965 -1.989123487  
P 2.476392302 1.492235738 2.358478032  
P 2.687206377 3.232853441 -0.650773412  
Rh 1.103722406 1.680673666 0.572245149  
C -0.978169110 2.657767787 3.131830809  
C -1.371367328 1.188789052 3.349676979  
C -0.972630909 0.154305087 2.313386919  
H -0.001166160 -0.662552032 0.652351416  
C -1.933838412 -1.011815495 2.537589417  
H -0.939087727 0.864907354 4.308729002  
C -2.878507917 0.894197696 3.442037581  
H 0.087170813 2.779718151 3.330221786  
H -1.512573670 3.273612753 3.860701031  
H -2.361687698 -1.355900219 1.583471275  
H -1.442013293 -1.869132421 3.017356006  
H -3.336069291 1.244267923 4.371116145  
H -3.418978499 1.350014081 2.597859317  
O -2.953908864 -0.531234711 3.413741033  
C -0.538990836 2.756883834 0.688521359  
C -0.832860617 2.758770726 -0.786066792  
C -2.518739135 3.953377069 1.586627666  
H -0.674852269 3.742170084 -1.233514484  
H -0.163356744 2.058498571 -1.333199825  
H -1.854074285 2.416364554 -0.974369167  
O -3.353617978 4.072815262 2.463562975  
O -2.625285958 4.564444322 0.379942994  
C -3.839032953 5.316333988 0.178403133  
H -3.761407356 5.729051950 -0.827524204  
H -4.712606061 4.665197959 0.263776934  
H -3.921636922 6.115921437 0.918848570  
H 4.028483705 -3.185878171 4.422606250  
H 3.919783146 -3.047387581 6.184613751  
H 2.589934364 -3.762655924 5.274985767  
H 0.731833389 0.243055115 8.145790669  
H 0.728278347 1.822851488 7.342709359  
H -0.538200277 0.646023888 6.985391301  
H 5.537899248 4.922683508 6.478230243  
H 5.671111937 3.167454943 6.270082589  
H 6.547396988 4.253965702 5.187947956  
H 0.858125152 6.495302091 3.212365095  
H 2.060709522 7.398424762 4.149984220  
H 2.303567099 7.123488119 2.418364418  
H 1.763582689 -1.075696463 -3.633777711  
H 2.981151541 -1.238168386 -4.911072397  
H 3.345012037 -1.778802277 -3.270096682  
H 7.040342869 1.704140438 -4.709059034  
H 6.149623880 3.076308983 -5.371733196  
H 6.952150045 3.223875268 -3.803755504  
H 1.357780358 7.966133136 -4.543424260  
H 3.049134052 7.513335737 -4.304793243  
H 1.937581029 6.376502454 -5.067730335  
H 0.100935527 7.780783613 1.053505409  
H -0.904876725 8.275036069 -0.315160736  
H -1.203787624 6.726674849 0.498870393

=====  
18B

=====  
C -1.289224007 3.135866127 1.754472166  
C -0.085370788 0.172809824 1.287390948  
C 2.250142259 0.379084064 3.866821112  
C 1.537190927 0.928125235 4.943159699

H 1.188355961 1.954727615 4.900376758  
C 1.287367559 0.187041972 6.101905110  
C 0.460731706 0.779866293 7.218328369  
C 1.796523834 -1.112203217 6.182929729  
H 1.617210580 -1.697631606 7.082437365  
C 2.551728797 -1.671313370 5.145746572  
C 3.108964789 -3.069158217 5.273322867  
C 2.774163901 -0.915776770 3.989726224  
H 3.384148559 -1.345053970 3.204972923  
C 3.059419148 2.991992931 3.218635730  
C 4.102840691 2.950567959 4.152273118  
H 4.630232778 2.019755742 4.341434262  
C 4.475281243 4.104056597 4.844123441  
C 5.642885156 4.080249036 5.800134561  
C 3.762129585 5.287591479 4.603260984  
H 4.040141575 6.187677293 5.147993614  
C 2.702808100 5.345198501 3.692918190  
C 1.968662286 6.634257682 3.415694123  
C 2.356361511 4.178908207 3.003266547  
H 1.528756535 4.188175206 2.302385183  
C 3.749884213 0.671447071 1.307959952  
C 3.387667948 -0.647005542 0.882804869  
H 2.490299546 -1.109738992 1.278661888  
C 4.154346226 -1.331104484 -0.026214394  
H 3.863123099 -2.329708986 -0.340897782  
C 5.332234549 -0.754594306 -0.557344230  
C 6.157786082 -1.473261941 -1.462498835  
H 5.874215896 -2.487573860 -1.731032982  
C 7.296492834 -0.903775078 -1.982439345  
H 7.926387041 -1.463705873 -2.667141394  
C 7.644756755 0.420551571 -1.623591670  
H 8.541447331 0.870885256 -2.039303956  
C 6.854023905 1.150657905 -0.766607132  
H 7.131856482 2.167538579 -0.519586414  
C 5.679437866 0.587912042 -0.190851826  
C 4.841064983 1.317792471 0.718466275  
C 5.099192596 2.784227311 0.906346931  
C 6.227403321 3.222847696 1.667178045  
C 7.080460745 2.313474109 2.350846296  
H 6.867523651 1.250665440 2.301337375  
C 8.171009954 2.764870961 3.059258617  
H 8.814555540 2.054794263 3.570636765  
C 8.464534972 4.149016866 3.125188511  
H 9.333510710 4.490110400 3.680495352  
C 7.646993527 5.057369115 2.492357307  
H 7.859214377 6.122116313 2.544868155  
C 6.513875890 4.624530787 1.754554531  
C 5.660259650 5.541609573 1.094943219  
H 5.880708348 6.604379795 -1.157303392  
C 4.570072555 5.103861297 0.383814406  
H 3.927834172 5.824616897 -0.109555917  
C 4.274615828 3.719146415 0.279334131  
C 2.007344019 4.688743692 -1.283433625  
C 2.138499087 5.087501912 -2.620263420  
H 2.740170837 4.498720899 -3.305945063  
C 1.501506285 6.244147249 -3.088202356  
C 1.681479751 6.685530584 -4.522215902  
C 0.718987960 6.987391257 -2.196369572  
H 0.211498957 7.880515533 -2.555362148  
C 0.566218134 6.609332535 -0.857205096  
C -0.330814054 7.380861701 0.080977313

C 1.221442106 5.457723165 -0.412946736  
 H 1.094357169 5.146429728 0.617250115  
 C 3.484238426 2.300942453 -2.085465946  
 C 4.677214620 2.754762768 -2.665096567  
 H 5.170761108 3.638185061 -2.268464719  
 C 5.265091391 2.062122741 -3.726765190  
 C 6.551489030 2.550397236 -4.348623609  
 C 4.639606185 0.899178669 -4.190985015  
 H 5.103726534 0.338515346 -5.000134531  
 C 3.445454792 0.427935219 -3.636179116  
 C 2.830424067 -0.865201713 -4.115742402  
 C 2.866370045 1.147266656 -2.584777134  
 H 1.934773546 0.797864216 -2.151505077  
 P 2.498378094 1.466474863 2.407415503  
 P 2.768899468 3.153707657 -0.631445900  
 Rh 1.158823848 1.610226158 0.588514258  
 C -1.008754485 2.609294836 3.142397281  
 C -1.374591874 1.123642637 3.337854261  
 C -0.968659311 0.104414537 2.286544548  
 H -0.036492400 -0.679434872 0.595861622  
 C -1.916947099 -1.074573820 2.505625302  
 H -0.930226322 0.805826588 4.292161543  
 C -2.875498191 0.801574763 3.443398916  
 H 0.052917417 2.737502430 3.357191956  
 H -1.553036734 3.199469441 3.889954781  
 H -2.361743607 -1.403950011 1.554658693  
 H -1.416940908 -1.936511917 2.966339388  
 H -3.333458618 1.140650228 4.377992891  
 H -3.431170655 1.243131750 2.597714742  
 O -2.929204293 -0.618626159 3.410465558  
 C -0.469626129 2.792804500 0.745666896  
 C -0.696690116 2.830264701 -0.695036153  
 C -2.523446917 3.989383955 1.592811309  
 H 3.827253409 -3.289621637 4.479209920  
 H 3.612346217 -3.210761462 6.235431616  
 H 2.307593431 -3.815178495 5.215008796  
 H 0.665274373 0.291596193 8.175182068  
 H 0.653320437 1.851391413 7.333650072  
 H -0.610482992 0.660322228 7.010893268  
 H 5.554832485 4.860041259 6.562037625  
 H 5.725886584 3.113883102 6.306906145  
 H 6.578616086 4.247759208 5.254903064  
 H 0.901564502 6.456726464 3.244603634  
 H 2.067483399 7.346177012 4.239642735  
 H 2.367690910 7.111533236 2.511833082  
 H 1.756808910 -0.902267501 -3.908382842  
 H 2.975694972 -1.007651170 -5.191151501  
 H 3.295071747 -1.720911235 -3.608621196  
 H 7.147241031 1.718219730 -4.736084680  
 H 6.351902543 3.227957008 -5.187444569  
 H 7.162793141 3.096256666 -3.623406608  
 H 0.871582528 7.345708928 -4.845522073  
 H 2.622221904 7.236330536 -4.645128674  
 H 1.717091730 5.829015305 -5.203047356  
 H 0.120750535 7.481051089 1.073286549  
 H -0.546576519 8.384067033 -0.296516346  
 H -1.287625554 6.859471264 0.208986591  
 O -1.466985369 3.739555126 -1.264946943  
 O -0.073496231 1.960509322 -1.347887016  
 C -1.493359708 3.748046427 -2.717260556  
 H -0.486790143 3.939126676 -3.094716564

H -1.862538799 2.792671870 -3.095317565  
 H -2.168031863 4.560323661 -2.982585389  
 H -3.394212059 3.479974753 2.022568367  
 H -2.737409354 4.246698132 0.556919510  
 H -2.396136247 4.918995277 2.163955497

=====

16A-TS

=====

C 1.597223377 3.541404796 12.058811401  
 C 0.991428347 4.409875489 11.136408474  
 H 0.836628910 5.451646873 11.403358103  
 C 0.600600124 3.966243900 9.871648296  
 C -0.061258187 4.899100548 8.886178482  
 C 0.810505404 2.619611668 9.544845776  
 H 0.500422538 2.258333876 8.566383248  
 C 1.402560754 1.727971204 10.443206924  
 C 1.630912701 0.285888816 10.056512575  
 C 1.795924476 2.202751136 11.704485802  
 H 2.248404026 1.512018859 12.407939751  
 C 2.784830836 2.892881850 14.677234622  
 C 3.910771672 2.183858773 14.232823812  
 H 4.335703745 2.398552402 13.255459603  
 C 4.516883470 1.225745875 15.048015856  
 C 5.759624798 0.498307327 14.598234902  
 C 3.991902297 1.009896317 16.328947407  
 H 4.478147766 0.286867178 16.980647731  
 C 2.884970786 1.717254044 16.804808574  
 C 2.407601862 1.548092162 18.226309288  
 C 2.276740321 2.649958162 15.957218275  
 H 1.435888670 3.235211611 16.321359641  
 C 3.568343260 5.252688418 13.230350614  
 C 3.948471337 5.399017571 11.868323467  
 H 3.407314166 4.869073150 11.096220452  
 C 5.005498412 6.196392775 11.509773579  
 H 5.288592414 6.288585049 10.464096600  
 C 5.745470677 6.901419490 12.487357625  
 C 6.835051840 7.738875239 12.130367582  
 H 7.088648444 7.843705545 11.078612040  
 C 7.563278286 8.394968035 13.094716221  
 H 8.402034156 9.025040021 12.812918388  
 C 7.219166723 8.248215725 14.460285081  
 H 7.793530561 8.773772728 15.217701143  
 C 6.162738936 7.450416212 14.836061825  
 H 5.909418218 7.352908036 15.885436875  
 C 5.395368244 6.746341555 13.866108511  
 C 4.296934113 5.897321743 14.224463295  
 C 4.029155513 5.662170332 15.679147606  
 C 4.982354604 4.849609773 16.389854959  
 C 6.105042438 4.256323474 15.744539295  
 H 6.248743056 4.406117454 14.681822361  
 C 7.010137698 3.496259213 16.449574000  
 H 7.865919217 3.067742915 15.935368422  
 C 6.838538238 3.267256144 17.834657718  
 H 7.561271947 2.664926315 18.377121939  
 C 5.760887934 3.815310194 18.489696696  
 H 5.619377493 3.655176908 19.555285717  
 C 4.819332413 4.615146257 17.792203995  
 C 3.727039769 5.221552811 18.454030732  
 H 3.615949233 5.088074391 19.527089294  
 C 2.824412198 5.988145630 17.764195964  
 H 2.027493219 6.459422139 18.317941517

|    |              |              |              |        |              |             |              |
|----|--------------|--------------|--------------|--------|--------------|-------------|--------------|
| C  | 2.937992408  | 6.207072510  | 16.361511619 | H      | -0.588146350 | 2.412731077 | 12.322667198 |
| C  | 0.780342376  | 8.165460918  | 16.754094261 | H      | -1.954687167 | 1.587355656 | 13.096454236 |
| C  | 0.849359788  | 9.559798185  | 16.620355824 | H      | -3.415418540 | 4.827779248 | 11.352719288 |
| H  | 1.291100439  | 10.005704127 | 15.737638570 | H      | -1.634606334 | 4.878630390 | 11.258422040 |
| C  | 0.353741581  | 10.409605964 | 17.616708114 | H      | -3.374994063 | 4.800042924 | 13.769353244 |
| C  | 0.416062718  | 11.908839086 | 17.434877052 | C      | -1.671465604 | 4.367611118 | 16.195870155 |
| C  | -0.224206876 | 9.845755186  | 18.759396555 | C      | -2.154715479 | 3.836639786 | 17.520900710 |
| H  | -0.602583596 | 10.498539454 | 19.542994762 | C      | -2.232702760 | 6.790499353 | 16.517091492 |
| C  | -0.351349802 | 8.458955753  | 18.903527816 | H      | -1.895169452 | 4.508750463 | 18.338886687 |
| C  | -1.068017252 | 7.850163501  | 20.083008062 | H      | -3.248177612 | 3.757522884 | 17.513757382 |
| C  | 0.149696279  | 7.634283296  | 17.889470648 | H      | -1.745809295 | 2.838023692 | 17.705327499 |
| H  | 0.017859841  | 6.561359054  | 17.987650265 | O      | -2.157989797 | 7.955596684 | 15.844969170 |
| C  | 2.252062027  | 8.156038964  | 14.252249921 | O      | -2.860359612 | 6.658923199 | 17.556853477 |
| C  | 3.248549001  | 9.068730546  | 14.637797857 | C      | -2.879119997 | 9.061300397 | 16.422066319 |
| H  | 3.588418086  | 9.095638527  | 15.669462491 | H      | -2.493983741 | 9.286596588 | 17.416952111 |
| C  | 3.817528657  | 9.937728819  | 13.706713529 | H      | -2.707562678 | 9.899947818 | 15.747737103 |
| C  | 4.884470168  | 10.929562285 | 14.103124457 | H      | -3.944855040 | 8.827252078 | 16.487911928 |
| C  | 3.397297750  | 9.852202364  | 12.370732992 | =====  |              |             |              |
| H  | 3.855141483  | 10.508941241 | 11.633517419 | 16B-TS |              |             |              |
| C  | 2.425881407  | 8.938437019  | 11.957004796 | =====  |              |             |              |
| C  | 2.056688380  | 8.787024462  | 10.500959199 | C      | 2.006977500  | 3.624871294 | 12.023758081 |
| C  | 1.840872691  | 8.107044233  | 12.920350068 | C      | 1.604632124  | 4.508866797 | 11.007783754 |
| H  | 1.084885930  | 7.388480293  | 12.620302087 | H      | 1.426239823  | 5.553454170 | 11.245534473 |
| P  | 2.077682755  | 4.252305856  | 13.681111819 | C      | 1.422098122  | 4.072817705 | 9.693535942  |
| P  | 1.507183901  | 7.032343153  | 15.485285315 | C      | 0.953306752  | 5.012732865 | 8.610031079  |
| H  | 0.990837546  | 8.567732681  | 10.374674435 | C      | 1.637337848  | 2.718638543 | 9.407731518  |
| H  | 2.287474439  | 9.687251744  | 9.925091178  | H      | 1.493091310  | 2.364740626 | 8.388976167  |
| H  | 2.618084944  | 7.954805498  | 10.057063873 | C      | 2.018516190  | 1.808959338 | 10.397236256 |
| H  | 4.600616741  | 11.948622659 | 13.816859739 | C      | 2.263333673  | 0.357533797 | 10.056721326 |
| H  | 5.068552566  | 10.917247280 | 15.180674417 | C      | 2.197272713  | 2.274084101 | 11.708556015 |
| H  | 5.828724485  | 10.696631649 | 13.600040773 | H      | 2.489274147  | 1.568607435 | 12.478442369 |
| H  | -0.506359134 | 7.008214595  | 20.502729326 | C      | 2.811871563  | 2.866086488 | 14.710504622 |
| H  | -1.230434116 | 8.581813956  | 20.879191625 | C      | 4.034470749  | 2.257351729 | 14.389188327 |
| H  | -2.042549477 | 7.465469631  | 19.760158031 | H      | 4.604495447  | 2.608094442 | 13.532576366 |
| H  | 0.501845540  | 12.426639757 | 18.394888427 | C      | 4.534010487  | 1.210073978 | 15.165588282 |
| H  | 1.266349290  | 12.203108674 | 16.811811423 | C      | 5.862062264  | 0.567812708 | 14.846808867 |
| H  | -0.492139502 | 12.280729956 | 16.943333985 | C      | 3.797363015  | 0.802542151 | 16.286466863 |
| H  | 5.769029936  | -0.539114647 | 14.946499474 | H      | 4.192036903  | 0.003777998 | 16.911418607 |
| H  | 5.857537419  | 0.495338709  | 13.508908597 | C      | 2.583269955  | 1.400758028 | 16.635524052 |
| H  | 6.648689367  | 0.990386308  | 15.010926269 | C      | 1.854764535  | 1.006812366 | 17.896434707 |
| H  | 1.339441874  | 1.766597814  | 18.324175958 | C      | 2.089616185  | 2.428148706 | 15.823205831 |
| H  | 2.585582283  | 0.534457073  | 18.597058746 | H      | 1.153432488  | 2.918671469 | 16.082578751 |
| H  | 2.945611473  | 2.241266779  | 18.885258763 | C      | 3.621862215  | 5.449144830 | 13.625214098 |
| H  | 1.901390260  | -0.325543252 | 10.921763565 | C      | 4.038207842  | 5.952885710 | 12.361808240 |
| H  | 0.736686675  | -0.149166995 | 9.598130356  | H      | 3.626370844  | 5.537330419 | 11.453163361 |
| H  | 2.442788394  | 0.203052121  | 9.323873764  | C      | 4.985708366  | 6.940248495 | 12.260493987 |
| H  | 0.368389560  | 4.789530108  | 7.885266265  | H      | 5.295545025  | 7.297398447 | 11.281229771 |
| H  | -1.132182945 | 4.678039299  | 8.802953292  | C      | 5.588429394  | 7.489435709 | 13.415898463 |
| H  | 0.043731233  | 5.945378982  | 9.186916413  | C      | 6.565195988  | 8.515884900 | 13.327616550 |
| C  | -1.632306038 | 6.070857599  | 13.662511691 | H      | 6.827340579  | 8.901797880 | 12.345796939 |
| C  | -1.544771223 | 5.680472098  | 15.819445534 | C      | 7.178469911  | 9.001416885 | 14.458172588 |
| Rh | 0.174767601  | 5.285518281  | 14.721225980 | H      | 7.933725253  | 9.778159501 | 14.380593012 |
| C  | -1.274925966 | 3.406530947  | 15.153819866 | C      | 6.827807030  | 8.482419071 | 15.727341419 |
| C  | -1.610512637 | 3.596013039  | 13.836129865 | H      | 7.317977221  | 8.864730189 | 16.618328632 |
| C  | -2.376715653 | 4.808702247  | 13.310056983 | C      | 5.869529879  | 7.501904228 | 15.845167668 |
| C  | -2.491111351 | 4.465095944  | 11.808417483 | H      | 5.604997181  | 7.127679688 | 16.826869002 |
| C  | -1.590039525 | 2.557248539  | 12.737959890 | C      | 5.221306921  | 6.967342594 | 14.695898977 |
| O  | -2.500314216 | 3.042651752  | 11.751122557 | C      | 4.232852597  | 5.929638144 | 14.782943900 |
| H  | -2.228286690 | 6.933503403  | 13.929801257 | C      | 3.953855995  | 5.347666422 | 16.133948908 |
| H  | -0.879909391 | 6.356947276  | 12.919268177 | C      | 4.972567361  | 4.524930263 | 16.723982908 |
| H  | -0.886331766 | 2.436569595  | 15.461860423 | C      | 6.186381253  | 4.215006523 | 16.047087787 |

H 6.349999975 4.596364857 15.046443438  
C 7.155446100 3.443500487 16.646470004  
H 8.079061889 3.232100583 16.114995088  
C 6.959874052 2.918874971 17.946647491  
H 7.733516115 2.310381683 18.405993636  
C 5.792903697 3.183748232 18.623630935  
H 5.631398759 2.789528623 19.623720519  
C 4.783263082 3.992498763 18.039047825  
C 3.598723866 4.321903664 18.736733063  
H 3.463841931 3.957996777 19.752470685  
C 2.632898949 5.106003620 18.158012221  
H 1.753629792 5.349888158 18.736102237  
C 2.781073399 5.616719250 16.837219976  
C 0.312276353 6.928107793 17.505071975  
C 0.164287822 8.201784739 18.055186845  
H 0.686012340 9.050950643 17.626382815  
C -0.681337502 8.413910432 19.157195199  
C -0.857246299 9.808629145 19.709819540  
C -1.362549238 7.324731998 19.702195616  
H -2.017175557 7.479650286 20.556858277  
C -1.231693969 6.031759609 19.169557235  
C -2.017684735 4.882621886 19.752072729  
C -0.398537753 5.851427716 18.067743601  
H -0.309128503 4.860577394 17.629791765  
C 2.126643646 8.131161463 15.503931940  
C 2.895710520 8.904705878 16.387987616  
H 3.024829872 8.585279657 17.418837465  
C 3.520439669 10.073088337 15.948384334  
C 4.374036769 10.901211569 16.876515180  
C 3.387262388 10.436932054 14.600976620  
H 3.891699627 11.333925589 14.247224095  
C 2.648456028 9.671432614 13.696095389  
C 2.597914573 10.026076355 12.229748724  
C 2.006846457 8.520645789 14.167687609  
H 1.451706105 7.897901530 13.476107675  
P 2.181903814 4.273647553 13.733929782  
P 1.379703983 6.561410904 16.053539730  
H 1.638774731 9.749578606 11.779900962  
H 2.755308314 11.095383480 12.064574376  
H 3.382579122 9.485458367 11.685797349  
H 4.169698832 11.970396868 16.759955091  
H 4.211545901 10.634108918 17.924190787  
H 5.435221285 10.744077477 16.651589839  
H -1.617046904 3.917119524 19.426360465  
H -2.007129025 4.904435190 20.846461213  
H -3.060091464 4.940892488 19.420609732  
H -1.322229446 9.795403348 20.699045357  
H 0.102974885 10.328474987 19.791952291  
H -1.495174119 10.410258826 19.051169120  
H 5.849856461 -0.505975803 15.057420264  
H 6.138662394 0.708172494 13.797712517  
H 6.652045136 1.015408658 15.460258454  
H 0.770905706 1.119196466 17.789030931  
H 2.065310594 -0.027790217 18.182530892  
H 2.169573618 1.652807271 18.725074867  
H 2.263070613 -0.271530404 10.951333654  
H 1.502821657 -0.025695234 9.369120747  
H 3.236101052 0.232956772 9.565439270  
H 1.464813788 4.815889038 7.662692373  
H -0.120973044 4.875899897 8.440712696  
H 1.124140440 6.060333410 8.876422929

C -1.049776056 6.651786948 13.148539066  
C -1.680110093 6.055972352 15.159861846  
Rh 0.157726695 5.332001149 14.484182405  
C -1.766839930 3.848766237 14.206562265  
C -1.582955895 4.249260636 12.907956085  
C -1.918233096 5.659470474 12.413256391  
C -1.679503412 5.526762007 10.894617746  
C -1.412772536 3.354753711 11.702587131  
O -1.829276900 4.144208582 10.584571324  
H -1.504887186 7.603510549 13.406820737  
H -0.090187183 6.829216804 12.653240038  
H -1.727089832 2.791355138 14.454081049  
H -0.386568291 2.997809699 11.580130290  
H -2.072234869 2.480389004 11.765049413  
H -2.408777242 6.082834303 10.299924840  
H -0.676006288 5.884845994 10.632481599  
H -2.981423159 5.844176342 12.616519505  
C -2.237859401 4.804785930 15.217754402  
C -3.199061473 4.394622643 16.277550918  
C -2.191060060 7.305492096 15.796282754  
H -2.436667535 7.139252553 16.846658145  
H -1.477887818 8.126705839 15.712855545  
H -3.125746360 7.599597475 15.303838452  
O -3.810288162 5.158425181 17.002256049  
O -3.278016985 3.048668749 16.369942720  
C -4.174103595 2.545337599 17.381874956  
H -4.179777857 1.463151103 17.254731863  
H -3.811973084 2.812575335 18.377846927  
H -5.176057373 2.958624741 17.244644405

=====  
18A-TS  
=====

C 2.152140011 7.491797124 11.655172369  
C 1.030933251 8.330214829 11.642822510  
H 0.247609868 8.182363973 12.380647542  
C 0.899904127 9.358663827 10.702533783  
C -0.306524342 10.268186170 10.715078293  
C 1.914550645 9.525353686 9.754350411  
H 1.815374963 10.307431913 9.003282939  
C 3.048743424 8.704950114 9.737778443  
C 4.126753720 8.910575551 8.698210261  
C 3.157601581 7.690668958 10.694656210  
H 4.032549929 7.051047157 10.678156492  
C 3.580282750 5.091399838 12.129298796  
C 4.936693844 5.213832483 12.435614163  
H 5.259878465 5.861998691 13.241751213  
C 5.898369175 4.519528770 11.687087365  
C 7.356800036 4.601781057 12.068887647  
C 5.469464214 3.759579459 10.595221465  
H 6.210906259 3.245579033 9.985812056  
C 4.114520142 3.654643249 10.242229424  
C 3.714392340 2.910113271 8.989900902  
C 3.169065042 4.305598896 11.038305412  
H 2.113793186 4.237355167 10.782109764  
C 2.839199476 6.904321540 14.484059959  
C 2.553310300 8.293309251 14.669136574  
H 2.295383790 8.895115697 13.806031041  
C 2.593460635 8.873830500 15.909503857  
H 2.391645706 9.935960843 16.022067475  
C 2.863227494 8.097158969 17.065535220  
C 2.814347277 8.653809035 18.369543027

|   |              |              |              |        |              |              |              |
|---|--------------|--------------|--------------|--------|--------------|--------------|--------------|
| H | 2.569123747  | 9.706985591  | 18.479023244 | H      | 8.010176191  | 4.348969866  | 11.228950376 |
| C | 3.061150476  | 7.872941067  | 19.476366659 | H      | 7.621040450  | 5.603852331  | 12.423111858 |
| H | 3.013171598  | 8.307064407  | 20.471073465 | H      | 7.576804037  | 3.908542319  | 12.890151801 |
| C | 3.374751927  | 6.501131643  | 19.322500746 | H      | 2.628454162  | 2.839832539  | 8.889367543  |
| H | 3.560064155  | 5.889262946  | 20.200750163 | H      | 4.097027776  | 3.427456549  | 8.102714332  |
| C | 3.448941879  | 5.936540720  | 18.068988980 | H      | 4.126361122  | 1.895897778  | 8.971257712  |
| H | 3.683479267  | 4.883599846  | 17.962096864 | H      | 4.920191078  | 8.163874866  | 8.787213697  |
| C | 3.189530246  | 6.711841270  | 16.904863264 | H      | 3.714354795  | 8.845493667  | 7.685015253  |
| C | 3.234088832  | 6.130455707  | 15.590696739 | H      | 4.585335988  | 9.901091787  | 8.796713296  |
| C | 3.900761622  | 4.787873449  | 15.457727220 | H      | -0.613306407 | 10.537651359 | 9.699956394  |
| C | 5.331744751  | 4.772375930  | 15.631576325 | H      | -1.160242862 | 9.796926019  | 11.211902518 |
| C | 6.095598065  | 5.953692838  | 15.852092006 | H      | -0.089550961 | 11.202392534 | 11.247369750 |
| H | 5.598039772  | 6.915657487  | 15.889051268 | C      | -1.009661207 | 6.952952151  | 13.927364829 |
| C | 7.461434697  | 5.896087079  | 16.020576863 | C      | -0.973934647 | 6.197286682  | 15.835699263 |
| H | 8.020605553  | 6.811549541  | 16.191380221 | Rh     | 0.427547130  | 5.676001018  | 14.318806063 |
| C | 8.142352335  | 4.657274601  | 15.979158991 | C      | -2.097701696 | 4.273086242  | 14.798527778 |
| H | 9.218288090  | 4.625379221  | 16.123241298 | C      | -1.326089127 | 4.763949370  | 13.582714517 |
| C | 7.437876862  | 3.497736303  | 15.750748415 | C      | -1.905222234 | 6.111445421  | 13.096697974 |
| H | 7.948982506  | 2.539174935  | 15.710744856 | C      | -1.642817581 | 5.998449818  | 11.565332452 |
| C | 6.030824639  | 3.525468141  | 15.565090964 | C      | -1.215547547 | 3.887276604  | 12.331762484 |
| C | 5.301409173  | 2.335495141  | 15.317491704 | O      | -1.869279730 | 4.623682251  | 11.294588471 |
| H | 5.836674060  | 1.391313916  | 15.267621029 | H      | -1.280775586 | 7.968386255  | 14.225788004 |
| C | 3.943538891  | 2.369454428  | 15.152452021 | H      | -3.149362979 | 4.087240992  | 14.534667579 |
| H | 3.404705144  | 1.448558190  | 14.964536120 | H      | -0.166900649 | 3.689620228  | 12.072315836 |
| C | 3.228340100  | 3.597417042  | 15.223262021 | H      | -1.723097353 | 2.923208224  | 12.442811427 |
| C | 0.955895466  | 2.133637857  | 14.150787125 | H      | -2.338819020 | 6.586451459  | 10.963092701 |
| C | -0.137077505 | 1.322298869  | 14.481737054 | H      | -0.612042280 | 6.288661298  | 11.323963812 |
| H | -0.675680828 | 1.479763066  | 15.411562997 | H      | -2.985270275 | 6.237150323  | 13.263590798 |
| C | -0.533432039 | 0.267949838  | 13.647958522 | C      | -1.974562188 | 5.277567609  | 15.917336469 |
| C | -1.701476214 | -0.610630063 | 14.030710769 | C      | -2.823696187 | 5.104229920  | 17.135103835 |
| C | 0.198895235  | 0.028399446  | 12.482292935 | C      | -0.613579360 | 7.289436359  | 16.800666798 |
| H | -0.090873255 | -0.795571663 | 11.832693566 | H      | 0.329130149  | 7.056414165  | 17.308159552 |
| C | 1.309784587  | 0.808782229  | 12.137548228 | H      | -0.425340865 | 8.224003479  | 16.264461618 |
| C | 2.092077351  | 0.510442953  | 10.881403956 | H      | -1.384203679 | 7.445730815  | 17.556148729 |
| C | 1.669441610  | 1.871000701  | 12.971565118 | O      | -2.797704182 | 5.799854055  | 18.135155481 |
| H | 2.526991582  | 2.480659200  | 12.707425381 | O      | -3.622275234 | 4.026199627  | 17.010885339 |
| C | 1.014916247  | 3.062164153  | 16.891536232 | C      | -4.441113612 | 3.727098982  | 18.159086953 |
| C | 1.268720496  | 1.740384562  | 17.300483852 | H      | -4.991654883 | 2.824086227  | 17.897347061 |
| H | 1.628111218  | 1.007138798  | 16.586030766 | H      | -3.813420770 | 3.559205004  | 19.038764803 |
| C | 1.047418833  | 1.344512694  | 18.618363065 | H      | -5.126292185 | 4.552813608  | 18.364278462 |
| C | 1.318866248  | -0.073514548 | 19.064140536 | H      | -1.706776238 | 3.313416005  | 15.150641664 |
| C | 0.571183926  | 2.296372591  | 19.535303332 | =====  |              |              |              |
| H | 0.387103551  | 1.990910544  | 20.563773258 | 18B-TS |              |              |              |
| C | 0.331652649  | 3.619758281  | 19.164630817 | =====  |              |              |              |
| C | -0.163707092 | 4.653499047  | 20.146758787 | C      | 2.058394700  | 5.864652974  | 11.125247797 |
| C | 0.565882088  | 3.990175918  | 17.830360562 | C      | 1.423430530  | 7.093907117  | 10.885136486 |
| H | 0.397074966  | 5.015179423  | 17.536470912 | H      | 0.997435342  | 7.651871755  | 11.715439068 |
| P | 2.293856708  | 6.130097590  | 12.891344737 | C      | 1.315009168  | 7.613270549  | 9.590884232  |
| P | 1.389658786  | 3.599094206  | 15.171921304 | C      | 0.671550662  | 8.959670086  | 9.352299858  |
| H | -1.103400081 | 5.099225689  | 19.802563048 | C      | 1.828476807  | 6.862364466  | 8.526027580  |
| H | -0.327128024 | 4.223683807  | 21.138886351 | H      | 1.733094635  | 7.245704929  | 7.512210445  |
| H | 0.563338236  | 5.468750110  | 20.244626132 | C      | 2.450580970  | 5.626079701  | 8.731635206  |
| H | 0.455846979  | -0.495818010 | 19.590726758 | C      | 2.997488829  | 4.839411998  | 7.563651573  |
| H | 1.550098688  | -0.725784929 | 18.217462973 | C      | 2.564664822  | 5.137400316  | 10.040313822 |
| H | 2.167811928  | -0.111570666 | 19.757142090 | H      | 3.037535821  | 4.174368164  | 10.199733566 |
| H | 3.082018436  | 0.971419221  | 10.913084044 | C      | 2.689324335  | 3.518902428  | 12.782481731 |
| H | 2.219164562  | -0.568335320 | 10.741485201 | C      | 3.960860611  | 3.156973829  | 12.321842627 |
| H | 1.572945253  | 0.891681924  | 9.992886529  | H      | 4.671373898  | 3.924709518  | 12.026065773 |
| H | -2.139199015 | -1.098837021 | 13.155270303 | C      | 4.348026407  | 1.812314748  | 12.276946105 |
| H | -1.384976239 | -1.400175700 | 14.722844718 | C      | 5.743708194  | 1.428507662  | 11.850099203 |
| H | -2.488328773 | -0.036598073 | 14.530394165 | C      | 3.432398851  | 0.841001341  | 12.696345259 |

|   |              |              |              |       |              |              |              |
|---|--------------|--------------|--------------|-------|--------------|--------------|--------------|
| H | 3.724451435  | -0.206889832 | 12.665591906 | H     | 1.805215836  | 10.010713150 | 15.586940233 |
| C | 2.158521267  | 1.177220278  | 13.170413762 | H     | 2.152541451  | 10.801565722 | 17.135583681 |
| C | 1.217857687  | 0.109939916  | 13.677084779 | H     | 3.476927003  | 10.201419123 | 16.132216972 |
| C | 1.799088921  | 2.525308399  | 13.209609330 | H     | 3.267753835  | 7.924574635  | 21.124027477 |
| H | 0.828840686  | 2.807542994  | 13.603767116 | H     | 3.307394470  | 6.163465259  | 20.934185445 |
| C | 3.563127173  | 6.204151017  | 13.656463717 | H     | 4.666790879  | 7.149500645  | 20.378077251 |
| C | 3.813699779  | 7.510988870  | 13.146470848 | H     | -0.792900456 | 0.059218233  | 15.981450638 |
| H | 3.358456297  | 7.814148613  | 12.211958962 | H     | -0.982851746 | -0.434684484 | 17.668282721 |
| C | 4.646859554  | 8.385329178  | 13.792963698 | H     | -2.370734074 | 0.184382420  | 16.776953884 |
| H | 4.844517460  | 9.366421973  | 13.368503437 | H     | -2.899064441 | 3.553219656  | 20.436419099 |
| C | 5.254076353  | 8.029308026  | 15.020237484 | H     | -1.413768140 | 4.375600452  | 20.938902416 |
| C | 6.083415648  | 8.943039254  | 15.723622569 | H     | -2.490695101 | 5.152462598  | 19.776148039 |
| H | 6.260920678  | 9.923392019  | 15.288711403 | H     | 5.769227813  | 0.424209381  | 11.417429283 |
| C | 6.648593110  | 8.598384927  | 16.929500792 | H     | 6.147866292  | 2.129897374  | 11.113905416 |
| H | 7.281259057  | 9.302745929  | 17.461130027 | H     | 6.416011924  | 1.438085385  | 12.715677501 |
| C | 6.399582931  | 7.317259745  | 17.476009608 | H     | 0.196138723  | 0.489509799  | 13.774100849 |
| H | 6.834753533  | 7.048390183  | 18.434426273 | H     | 1.193763973  | -0.757234158 | 13.009241721 |
| C | 5.612166984  | 6.405893247  | 16.809592364 | H     | 1.535008439  | -0.248407322 | 14.664807657 |
| H | 5.428003462  | 5.436095668  | 17.253335527 | H     | 3.290828284  | 3.828735948  | 7.860001171  |
| C | 5.019138242  | 6.722276566  | 15.554227458 | H     | 2.257889234  | 4.755786218  | 6.760708773  |
| C | 4.191457227  | 5.785854195  | 14.834087687 | H     | 3.880232158  | 5.332798251  | 7.140246339  |
| C | 4.139474886  | 4.385902884  | 15.389282269 | H     | 0.186090156  | 9.004445739  | 8.372546973  |
| C | 5.349786766  | 3.610421004  | 15.303022741 | H     | -0.079384457 | 9.188783220  | 10.115861275 |
| C | 6.488944246  | 4.055105142  | 14.573870899 | H     | 1.421587330  | 9.760140485  | 9.380489251  |
| H | 6.446959269  | 5.000366702  | 14.046398463 | C     | -1.091388734 | 6.804361691  | 13.268042335 |
| C | 7.644154242  | 3.307550230  | 14.532753981 | C     | -1.490801624 | 5.994127980  | 15.424135715 |
| H | 8.500879325  | 3.672669196  | 13.973622072 | Rh    | 0.217844556  | 5.753647830  | 14.133190452 |
| C | 7.727977902  | 2.068767609  | 15.212266299 | C     | -2.091630258 | 3.949770225  | 14.267459744 |
| H | 8.648985002  | 1.494158118  | 15.179487987 | C     | -1.292930018 | 4.590153590  | 13.147393407 |
| C | 6.638813668  | 1.595703889  | 15.905984151 | C     | -1.988937591 | 5.854141721  | 12.585532263 |
| H | 6.684786644  | 0.642068929  | 16.425271564 | C     | -1.872069933 | 5.662768341  | 11.045019011 |
| C | 5.434105152  | 2.344060669  | 15.966792064 | C     | -0.973125018 | 3.756076538  | 11.897069454 |
| C | 4.313609230  | 1.880321030  | 16.694556557 | O     | -1.864317812 | 4.246964973  | 10.896808147 |
| H | 4.381161479  | 0.933768858  | 17.224687776 | H     | -1.261629120 | 7.880113051  | 13.354727014 |
| C | 3.155427173  | 2.611931305  | 16.738973588 | H     | -3.027819498 | 3.541112031  | 13.851701355 |
| H | 2.321796376  | 2.234549754  | 17.315609018 | H     | 0.064583308  | 3.869610337  | 11.562627049 |
| C | 3.044177312  | 3.866726507  | 16.077630095 | H     | -1.175281372 | 2.689458602  | 12.038391799 |
| C | 0.318749511  | 3.772352252  | 17.167444898 | H     | -2.731124619 | 6.060606339  | 10.501718287 |
| C | -0.346370070 | 4.302235587  | 18.272086140 | H     | -0.948727761 | 6.105706437  | 10.649664508 |
| H | -0.150763343 | 5.316912242  | 18.599064425 | H     | -3.047651426 | 5.950015752  | 12.861396878 |
| C | -1.329921660 | 3.554827515  | 18.940348388 | C     | -2.358072341 | 4.958734369  | 15.360353602 |
| C | -2.078676057 | 4.186329039  | 20.088171742 | C     | -3.517397044 | 4.693623025  | 16.275849685 |
| C | -1.610150764 | 2.263412392  | 18.493940507 | C     | -1.544988262 | 7.073817666  | 16.428157016 |
| H | -2.368656749 | 1.676548478  | 19.008100035 | H     | -3.664051333 | 5.494702514  | 16.997575774 |
| C | -0.957356395 | 1.706913362  | 17.380971901 | H     | -4.434562183 | 4.544734676  | 15.692361625 |
| C | -1.291811535 | 0.306963567  | 16.922429230 | H     | -3.333468241 | 3.765394305  | 16.830546938 |
| C | -0.006520365 | 2.478545232  | 16.715234448 | O     | -1.087844723 | 8.250654397  | 15.926960143 |
| H | 0.494204665  | 2.065008496  | 15.843584697 | O     | -1.918619422 | 6.958340998  | 17.583312807 |
| C | 1.910704562  | 6.264545166  | 17.124069904 | C     | -1.062486013 | 9.343837624  | 16.866028343 |
| C | 2.443860392  | 6.134636391  | 18.414050298 | H     | -0.394444779 | 9.108733098  | 17.698201396 |
| H | 2.480483114  | 5.156913298  | 18.887691243 | H     | -0.688617073 | 10.201720336 | 16.306975455 |
| C | 2.945592617  | 7.247568488  | 19.092718280 | H     | -2.065073259 | 9.542160585  | 17.252879997 |
| C | 3.573375463  | 7.111071485  | 20.458255209 | H     | -1.554330770 | 3.101346269  | 14.714011380 |
| C | 2.914624455  | 8.493041793  | 18.451543958 | ===== |              |              |              |
| H | 3.321544096  | 9.360838487  | 18.966997167 | 17    |              |              |              |
| C | 2.402904277  | 8.650136532  | 17.160896597 | ===== |              |              |              |
| C | 2.454811951  | 9.989348720  | 16.466498195 | C     | 1.421953956  | 5.229945372  | 10.695807516 |
| C | 1.893917095  | 7.521454126  | 16.509563616 | C     | 0.993466477  | 6.534331315  | 10.417090664 |
| H | 1.510499506  | 7.634152963  | 15.497474155 | H     | 0.867335900  | 7.244917164  | 11.229669217 |
| P | 2.180103970  | 5.267153230  | 12.864480275 | C     | 0.740694949  | 6.951044407  | 9.101255039  |
| P | 1.440531807  | 4.791939130  | 16.142966215 | C     | 0.311859176  | 8.371084265  | 8.818766526  |

|   |              |              |              |    |              |              |              |
|---|--------------|--------------|--------------|----|--------------|--------------|--------------|
| C | 0.882912486  | 6.014942338  | 8.074030159  | C  | 3.427824860  | 5.312446355  | 17.910576988 |
| H | 0.683019871  | 6.321617972  | 7.049462326  | H  | 3.407032638  | 4.259766755  | 18.178586082 |
| C | 1.272503204  | 4.692788445  | 8.324174201  | C  | 4.178571598  | 6.200141768  | 18.679357586 |
| C | 1.404661450  | 3.707787571  | 7.186289375  | C  | 4.954907686  | 5.730828862  | 19.887455551 |
| C | 1.546829814  | 4.312195860  | 9.639849405  | C  | 4.220413810  | 7.549831924  | 18.292126364 |
| H | 1.867930360  | 3.295828356  | 9.834705300  | H  | 4.810916601  | 8.247685934  | 18.882653216 |
| C | 2.098658362  | 2.946276025  | 12.295788658 | C  | 3.548807285  | 8.015615608  | 17.161885292 |
| C | 3.285429235  | 2.366418828  | 11.846169671 | C  | 3.647529819  | 9.453300160  | 16.713876353 |
| H | 4.146017139  | 2.989609587  | 11.621078698 | C  | 2.784461531  | 7.106281968  | 16.416487704 |
| C | 3.386006404  | 0.976008538  | 11.696196551 | H  | 2.254008807  | 7.449991091  | 15.533898075 |
| C | 4.690986120  | 0.360106754  | 11.253882925 | P  | 1.870824145  | 4.749603789  | 12.419381838 |
| C | 2.263563694  | 0.193895505  | 11.979698581 | P  | 1.814804592  | 4.568937581  | 15.730952571 |
| H | 2.329069003  | -0.885643303 | 11.859698332 | H  | 2.674195211  | 9.827273694  | 16.378125578 |
| C | 1.050726784  | 0.756098891  | 12.404473889 | H  | 4.008985966  | 10.104617572 | 17.514649569 |
| C | -0.141824922 | -0.129443095 | 12.676653783 | H  | 4.344910468  | 9.540806268  | 15.872089180 |
| C | 0.982248048  | 2.140702062  | 12.565867967 | H  | 4.680564820  | 6.301424595  | 20.781840345 |
| H | 0.056923800  | 2.604219424  | 12.900675527 | H  | 4.778243544  | 4.672070014  | 20.096042880 |
| C | 3.477007036  | 5.606704251  | 12.776617597 | H  | 6.032348391  | 5.867929046  | 19.737500662 |
| C | 3.717567356  | 6.834450319  | 12.097173865 | H  | -1.277527263 | 0.362426232  | 15.302818077 |
| H | 3.138899508  | 7.081427955  | 11.217408820 | H  | -0.721605558 | -0.588734626 | 16.683331998 |
| C | 4.686250583  | 7.709129594  | 12.517534660 | H  | -2.300912120 | 0.191712473  | 16.737827113 |
| H | 4.858907674  | 8.632224180  | 11.971150333 | H  | -1.170293494 | 2.598153328  | 20.881102892 |
| C | 5.466399828  | 7.429830172  | 13.663580128 | H  | 0.451201803  | 3.302474653  | 20.973757444 |
| C | 6.433118979  | 8.347939635  | 14.149993883 | H  | -0.915326151 | 4.309054727  | 20.491838155 |
| H | 6.570799218  | 9.288226187  | 13.622331950 | H  | 4.578709074  | -0.701826258 | 11.018794213 |
| C | 7.179083154  | 8.054627610  | 15.267603728 | H  | 5.086909766  | 0.865464207  | 10.366264529 |
| H | 7.913918425  | 8.764390007  | 15.635942195 | H  | 5.444891111  | 0.456318680  | 12.042271258 |
| C | 6.986430382  | 6.825562272  | 15.941817757 | H  | -1.039270143 | 0.457674951  | 12.892153504 |
| H | 7.566866515  | 6.605775748  | 16.833068823 | H  | -0.361386663 | -0.771115397 | 11.816435341 |
| C | 6.070287030  | 5.908489068  | 15.483214185 | H  | 0.043736067  | -0.790261270 | 13.531324662 |
| H | 5.924275705  | 4.980186135  | 16.020449605 | H  | 1.745217042  | 2.729627794  | 7.536626172  |
| C | 5.278628458  | 6.177009601  | 14.331778212 | H  | 0.445721667  | 3.567173677  | 6.674634917  |
| C | 4.296587492  | 5.246442947  | 13.848694552 | H  | 2.119593082  | 4.066023318  | 6.437026628  |
| C | 4.260058779  | 3.881968351  | 14.468149530 | H  | 0.250717609  | 8.563592282  | 7.744746040  |
| C | 5.376545820  | 3.014007602  | 14.204204533 | H  | -0.667678801 | 8.575331311  | 9.263042364  |
| C | 6.444130172  | 3.383439675  | 13.336288928 | H  | 1.022043516  | 9.087438885  | 9.247569020  |
| H | 6.414901343  | 4.341873032  | 12.833372663 | C  | -0.731475029 | 8.157395164  | 14.560066135 |
| C | 7.516286442  | 2.546248545  | 13.129145530 | C  | -0.847054207 | 6.893477807  | 15.436051848 |
| H | 8.318946966  | 2.855209760  | 12.465853073 | Rh | 0.466092066  | 5.523353815  | 14.121921601 |
| C | 7.584719511  | 1.288885954  | 13.773926113 | C  | -1.841433145 | 5.656814674  | 13.560907992 |
| H | 8.442357688  | 0.643057702  | 13.610976561 | C  | -1.854394957 | 6.776403222  | 12.790414071 |
| C | 6.557372232  | 0.885360262  | 14.594424064 | C  | -1.709676597 | 8.145746650  | 13.391194024 |
| H | 6.589173520  | -0.083886686 | 15.083804430 | C  | -1.373856024 | 8.983440575  | 12.150401795 |
| C | 5.433940324  | 1.723464634  | 14.820478979 | C  | -2.181410430 | 6.944672367  | 11.335655837 |
| C | 4.363662600  | 1.319489997  | 15.651528807 | O  | -2.090673444 | 8.353547346  | 11.082977991 |
| H | 4.400938905  | 0.341495608  | 16.124311526 | H  | -0.896870396 | 9.037356374  | 15.185296970 |
| C | 3.292353911  | 2.146334393  | 15.870526892 | H  | 0.296166970  | 8.253422873  | 14.177299293 |
| H | 2.497350127  | 1.807428523  | 16.519692595 | H  | -2.143330692 | 4.693359321  | 13.157673379 |
| C | 3.223606550  | 3.441513663  | 15.284070098 | H  | -1.493499361 | 6.380418590  | 10.693971360 |
| C | 0.792404154  | 3.512493980  | 16.825829635 | H  | -3.205032962 | 6.617581065  | 11.110041522 |
| C | 0.584601917  | 3.785476472  | 18.177400547 | H  | -1.707632025 | 10.022085805 | 12.208767141 |
| H | 1.025826243  | 4.661124225  | 18.636019849 | H  | -0.288461301 | 8.975058384  | 11.958863893 |
| C | -0.242958803 | 2.959699649  | 18.954819256 | H  | -2.710777911 | 8.440061539  | 13.742321000 |
| C | -0.485645298 | 3.304771373  | 20.404528154 | C  | -1.550509744 | 5.741537460  | 14.997964718 |
| C | -0.833752206 | 1.849278010  | 18.354489132 | C  | -2.188905002 | 4.684768667  | 15.861419486 |
| H | -1.473351862 | 1.201005910  | 18.949865319 | C  | -0.507042376 | 7.081927381  | 16.882930940 |
| C | -0.633718824 | 1.546437885  | 16.997823927 | H  | -1.706827601 | 4.574727906  | 16.825157944 |
| C | -1.269057015 | 0.316843627  | 16.393939415 | H  | -3.234934641 | 4.973584500  | 16.031952775 |
| C | 0.168685227  | 2.394992780  | 16.239005046 | H  | -2.189520946 | 3.723664637  | 15.341777839 |
| H | 0.330246338  | 2.179471176  | 15.186949899 | O  | 0.091138132  | 8.275830381  | 17.095679465 |
| C | 2.708738439  | 5.765683040  | 16.790104656 | O  | -0.720384277 | 6.298913046  | 17.790112172 |

C 0.467904956 8.539132447 18.461755181  
H -0.405375866 8.483965225 19.115893923  
H 0.886641395 9.545097314 18.457427194  
H 1.217966017 7.816996224 18.791077426

19

C 1.146564083 4.937365648 10.581213116  
C 0.453148319 6.110372915 10.266696668  
H 0.250093024 6.827649758 11.049676284  
C 0.015070590 6.371154537 8.963159155  
C -0.712499509 7.656747077 8.645495736  
C 0.277396135 5.418050319 7.975644657  
H -0.073038647 5.595772185 6.960697714  
C 0.972159741 4.233552126 8.257378346  
C 1.236335156 3.226828527 7.162137266  
C 1.402786413 4.001568475 9.566482270  
H 1.923514157 3.077667804 9.792879332  
C 1.888577503 2.815804708 12.305578467  
C 3.101266013 2.197672291 11.992907568  
H 3.996781670 2.789678477 11.841333754  
C 3.174860918 0.803735444 11.861419433  
C 4.507673076 0.145881396 11.593174985  
C 1.997075448 0.058020903 11.986685820  
H 2.039348378 -1.021725988 11.855655090  
C 0.759368511 0.663006810 12.252212507  
C -0.516836390 -0.145812000 12.275089373  
C 0.721006112 2.047361923 12.438410388  
H -0.233097392 2.523011488 12.649234062  
C 3.144563618 5.612850058 12.700459538  
C 3.225271542 6.877671443 12.039506169  
H 2.592570836 7.065528385 11.180943080  
C 4.088282093 7.852690944 12.461053272  
H 4.143891103 8.797390374 11.927593067  
C 4.912818722 7.653966019 13.596798585  
C 5.781474083 8.671227821 14.067846453  
H 5.799085692 9.624573227 13.546571229  
C 6.586573066 8.454892208 15.162537846  
H 7.251198494 9.238024037 15.515430388  
C 6.542186692 7.211211578 15.836417648  
H 7.164954112 7.051535710 16.711716354  
C 5.712827640 6.203945481 15.398486469  
H 5.683506051 5.262686965 15.934386624  
C 4.875879863 6.387952330 14.261255335  
C 4.005719138 5.346881815 13.777878912  
C 4.236928254 3.984230670 14.366045814  
C 5.455284665 3.323560866 13.974142563  
C 6.292066311 3.823935814 12.937140066  
H 6.015488775 4.737168837 12.422573174  
C 7.440963518 3.159484637 12.570286121  
H 8.061052182 3.557720126 11.772417692  
C 7.824094403 1.966527549 13.226051879  
H 8.738244641 1.458470826 12.933738301  
C 7.036300202 1.452735763 14.230483166  
H 7.319215400 0.535842559 14.739889534  
C 5.838237431 2.105748814 14.621099485  
C 5.014605194 1.591182496 15.653598080  
H 5.323936102 0.689595985 16.176009621  
C 3.843359045 2.215909855 15.991612446  
H 3.231866805 1.801362435 16.783763778  
C 3.422218754 3.403611737 15.327436418

C 0.837768190 2.878935777 16.537377682  
C -0.032105283 3.126254628 17.605459266  
H -0.017935258 4.089020101 18.110289426  
C -0.911891797 2.132372453 18.062167611  
C -1.831434399 2.414656943 19.227462052  
C -0.895212103 0.885129067 17.434438985  
H -1.564438889 0.103595539 17.788323019  
C -0.030042456 0.607712397 16.365472442  
C -0.008276103 -0.764193600 15.735216547  
C 0.816036494 1.619408186 15.910286748  
H 1.461860140 1.420366854 15.061884329  
C 2.415973742 5.260334062 17.223640482  
C 2.683204313 4.699775562 18.483214205  
H 2.461177453 3.653464550 18.672411602  
C 3.227765270 5.476520169 19.506968934  
C 3.525508829 4.880383133 20.862715820  
C 3.523449170 6.822937459 19.243752381  
H 3.953201294 7.431867810 20.037043901  
C 3.293166583 7.401395955 17.993008112  
C 3.661999921 8.835993707 17.699474765  
C 2.722215240 6.604924145 16.988634478  
H 2.540553640 7.049229527 16.014457349  
P 1.633119596 4.616886321 12.322897785  
P 1.845020689 4.224943983 15.816286641  
H 2.862886793 9.341614609 17.149316608  
H 3.865736027 9.395015427 18.617449089  
H 4.561633670 8.873901968 17.074993805  
H 3.225494607 5.556626928 21.669936001  
H 3.008158936 3.927787601 21.007514667  
H 4.600284885 4.695946888 20.979929463  
H 0.714164870 -0.813774855 14.916856663  
H 0.262188583 -1.527771139 16.473548104  
H -0.993021954 -1.033402349 15.337655922  
H -2.556979825 1.609992637 19.372818488  
H -1.261911655 2.522011233 20.158289875  
H -2.386207855 3.348028424 19.080219264  
H 4.391523102 -0.898417801 11.290034687  
H 5.057906931 0.671886970 10.805556661  
H 5.138241875 0.173297452 12.489796983  
H -1.336377234 0.419944825 12.727343447  
H -0.820115632 -0.404957716 11.253200816  
H -0.395258215 -1.085956516 12.820917706  
H 1.728691737 2.330240165 7.548607501  
H 0.302837618 2.917539913 6.678611045  
H 1.877393956 3.653551589 6.382089707  
H -1.331641380 7.557795950 7.749569811  
H -1.361531634 7.965410183 9.472130208  
H -0.004018197 8.474783241 8.466350168  
C -1.780371915 7.010781580 12.908438434  
C -0.509566008 7.414184395 13.661392871  
Rh 0.645868815 5.618127989 14.210598341  
C -0.994540915 5.970438581 15.568554503  
C -1.412560581 5.096413250 14.503040801  
C -2.302354725 5.662878950 13.409371548  
C -2.355667265 4.477115734 12.443361353  
C -1.814147589 3.647254147 14.588880123  
O -2.302072488 3.305778706 13.281153974  
H -2.537285586 7.799259082 13.027594338  
H -1.565554213 6.959546327 11.838612641  
H -0.968507999 5.695581474 16.615262044  
H -1.001283970 2.974657831 14.858464401



H -2.619101243 3.518363068 15.331765333  
H -3.276048887 4.435414019 11.853310518  
H -1.495726437 4.493538126 11.759831095  
H -3.299969640 5.775129583 13.861709423  
C -0.531979107 7.231957801 15.114287143  
C 0.028747264 8.208859261 16.103553490  
C 0.216596355 8.615187218 13.088905505  
H 1.256263886 8.666912484 13.415807482  
H 0.193993629 8.590053017 11.996281988  
H -0.262256707 9.550066298 13.407997587  
O 0.812902323 9.100491165 15.845114894  
O -0.477112621 7.977197371 17.328381939  
C -0.017063387 8.840128970 18.391052544  
H -0.713044480 8.683666460 19.214901597  
H 0.993974143 8.550964564 18.685035621  
H -0.024447175 9.882884409 18.067119124

=====  
20A  
=====

Rh 0.446301916 1.559407960 0.819480790  
P 2.668060646 1.786374815 1.309559955  
C 0.807695002 -0.303533411 0.210066488  
C 0.773064714 2.020145329 -1.182427040  
C 0.745077247 -0.463235940 -1.113619819  
C 0.455700982 0.747244566 -1.968429709  
C 1.315423020 0.402472490 -3.203528789  
C 1.123381115 -1.597202498 -2.045439592  
O 1.141457795 -1.006790077 -3.349803974  
H 0.104050942 2.860262198 -1.393190800  
H 1.810228692 2.323765492 -1.330834387  
H 1.095608158 -1.069332960 0.931813606  
H 2.114319608 -1.996960548 -1.779080068  
H 0.409910572 -2.429022397 -2.059563246  
H 0.990412964 0.877171621 -4.132398172  
H 2.370663851 0.662048690 -3.013388167  
H -0.601318984 0.740970675 -2.269883063  
C -2.219142753 1.061948665 0.292409954  
C -1.860136304 2.100833182 0.831954263  
C -2.648833444 -0.169421133 -0.341200288  
C -1.772760925 3.400547768 1.486270248  
H -1.784175045 -0.821666326 -0.510593574  
H -3.368433905 -0.690961444 0.299069400  
H -3.130024700 0.044686795 -1.301466283  
C 3.051255593 3.557273388 1.584308091  
C 3.765321967 3.972250676 2.719733143  
H 4.097634616 3.244735871 3.452898023  
C 4.052566028 5.325222305 2.911298328  
H 4.604929668 5.635505874 3.793111620  
C 3.638602540 6.274177883 1.974121368  
H 3.866723366 7.324792604 2.125735883  
C 2.930479756 5.866966136 0.840180668  
H 2.606151209 6.599933167 0.107496659  
C 2.630008472 4.518858052 0.647931301  
H 2.062186234 4.221210484 -0.226948254  
C 3.028878618 0.934729102 2.879766761  
C 4.273127866 0.341722728 3.144298448  
H 5.055354097 0.350991628 2.392553783  
C 4.507500165 -0.261880030 4.380037394  
H 5.472041187 -0.718942067 4.579496613  
C 3.509578756 -0.277321809 5.356250797  
H 3.696812885 -0.750027718 6.315673288

C 2.271390169 0.317796682 5.102165253  
H 1.496161917 0.311396646 5.862232035  
C 2.031659759 0.922765024 3.870208919  
H 1.071227034 1.402474656 3.689109927  
C 3.859739803 1.167916894 0.073530042  
C 4.535420841 2.043638397 -0.788722848  
H 4.431478634 3.117535246 -0.676528768  
C 5.358843209 1.537292287 -1.796664762  
H 5.877665896 2.223274519 -2.459324760  
C 5.521343556 0.160305196 -1.946444512  
H 6.162806719 -0.230218529 -2.730537290  
C 4.863942059 -0.717057741 -1.079378970  
H 4.997416338 -1.789590597 -1.183902032  
C 4.032003718 -0.219735603 -0.079684782  
H 3.525433383 -0.910217023 0.585243576  
O -2.676953949 4.154759445 1.720215873  
O -0.460915602 3.624882587 1.804633064  
C -0.166041559 4.862394002 2.511642717  
H 0.878894362 4.787711269 2.802736490  
H -0.322179152 5.710753379 1.843229278  
H -0.821013560 4.948074683 3.379976694

=====  
20B  
=====

Rh 0.450924351 1.506695302 0.833662786  
P 2.632416646 1.518326231 1.516718528  
C 0.651047519 -0.233034751 -0.102628482  
C 1.033259427 2.312018128 -1.001165675  
C 0.642885240 -0.115168434 -1.427295747  
C 0.585716544 1.267903845 -2.031961299  
C 1.451832856 1.035434609 -3.288336009  
C 0.882568962 -1.096516498 -2.557200606  
O 1.087596816 -0.278101364 -3.713987804  
H 0.543636381 3.284735435 -1.117388707  
H 2.113807734 2.461935260 -1.043519044  
H 0.779606753 -1.134669763 0.495140728  
H 1.766600883 -1.721229929 -2.351602614  
H 0.033666863 -1.760937052 -2.754609889  
H 1.249702686 1.721495700 -4.114648223  
H 2.521095824 1.092508278 -3.024070892  
H -0.444467983 1.467683763 -2.356829931  
C -2.067355601 2.300190966 0.134768793  
C -1.899186818 1.514951730 1.057978615  
C -2.365425748 3.242183207 -0.932835428  
C -2.090235295 0.537099829 2.123935752  
H -1.550393655 3.956807668 -1.082683628  
H -2.539715806 2.710636918 -1.874359011  
H -3.273640691 3.801391003 -0.681624290  
C 2.965991559 3.173713620 2.220649391  
C 3.835129312 3.330920285 3.313967723  
H 4.299797775 2.464419018 3.773054417  
C 4.105192009 4.603352328 3.814548347  
H 4.779823627 4.716167302 4.658171512  
C 3.512817749 5.727895499 3.234844141  
H 3.724062372 6.716841372 3.630306034  
C 2.652616988 5.580435743 2.145181128  
H 2.195555503 6.453219356 1.688534442  
C 2.380807259 4.310470424 1.636675421  
H 1.726297692 4.210904143 0.776364922  
C 2.879406439 0.356733104 2.904032831  
C 3.736463886 -0.750045535 2.826422747

H 4.306910443 -0.942908781 1.924543364  
C 3.879798183 -1.599105523 3.925434391  
H 4.549236346 -2.451565821 3.859713822  
C 3.181290733 -1.346819075 5.106726080  
H 3.304044329 -2.004664610 5.961936249  
C 2.330157399 -0.240787096 5.191739502  
H 1.791118102 -0.035603216 6.112107146  
C 2.171399985 0.602805126 4.094496001  
H 1.511002862 1.462631757 4.167998848  
C 3.943911206 1.205664289 0.286341511  
C 4.951557494 2.156675445 0.059911029  
H 4.972281147 3.081431789 0.627003710  
C 5.934804658 1.917313267 -0.901687440  
H 6.709824568 2.659330937 -1.071617071  
C 5.923568845 0.733425156 -1.640103883  
H 6.689039885 0.551660901 -2.388585240  
C 4.924037293 -0.218180145 -1.416796513  
H 4.909680352 -1.140394986 -1.990576562  
C 3.935127483 0.015883387 -0.463909476  
H 3.151565723 -0.717798536 -0.316568314  
O -3.147328669 0.094674678 2.487360798  
O -0.875951835 0.184107539 2.623862210  
C -0.890816662 -0.899854603 3.593650237  
H 0.152113228 -1.159867056 3.753469834  
H -1.354244852 -0.555769911 4.520787857  
H -1.457171088 -1.741578002 3.191405810

=====

20A-TS1

=====

C 0.163677715 0.112595736 -0.120738196  
C -0.314576304 0.443682054 1.864561668  
Rh 1.933422712 0.050330533 0.896419898  
P 3.181486763 -1.133046408 -0.761345796  
C 2.275291028 1.887385488 -0.008683892  
C 0.004929830 1.305646940 -0.741471715  
C 0.906809359 2.449003929 -0.372061511  
C 0.783780057 3.325453814 -1.645506736  
C -0.839750879 1.732160673 -1.915677266  
O -0.562107624 3.119557769 -2.071898681  
H 2.813472524 2.465858056 0.748892166  
H 2.891393112 1.733238600 -0.895350481  
H -0.362085417 -0.796654519 -0.405890826  
H -0.547383741 1.158103525 -2.810821694  
H -1.915600623 1.598158222 -1.755137868  
H 0.923737858 4.392730885 -1.465781044  
H 1.501383603 2.985535568 -2.410645571  
H 0.465594152 2.984489417 0.480861288  
C 0.746938892 0.893276936 2.400374621  
C -1.699725655 -0.051145754 1.957637671  
C 1.305412626 1.538810655 3.595516194  
H -2.366063263 0.503083399 1.291001751  
H -1.764427954 -1.115217694 1.709361573  
H -2.028480472 0.087300538 2.993930089  
O 0.694128346 2.267129254 4.340487616  
O 2.613830810 1.221059933 3.712058543  
C 3.293255226 1.791017729 4.858140542  
H 4.317050179 1.424634391 4.799057872  
H 3.264672349 2.881968854 4.808258908  
H 2.815414197 1.459506071 5.782492927  
C 4.997686877 -0.955035066 -0.643644057  
C 5.540248258 0.191197735 -0.040617485

H 4.886451994 0.954913717 0.371667425  
C 6.923728191 0.362240526 0.028072764  
H 7.335070069 1.252833782 0.493868565  
C 7.774967157 -0.611484607 -0.497659090  
H 8.851307125 -0.480401567 -0.441626255  
C 7.240562706 -1.758368972 -1.091518379  
H 7.900706033 -2.519942348 -1.496039021  
C 5.859709459 -1.932740204 -1.165731593  
H 5.453600843 -2.830451904 -1.621920221  
C 2.845813633 -2.925051201 -0.658331209  
C 2.675704758 -3.480871526 0.621038088  
H 2.737459359 -2.847815016 1.504863670  
C 2.447494280 -4.847440475 0.772612344  
H 2.319949766 -5.268117567 1.765577868  
C 2.384600827 -5.671695494 -0.353271726  
H 2.203586816 -6.736041111 -0.237084137  
C 2.556266684 -5.127912032 -1.627878416  
H 2.512369871 -5.768923940 -2.503431687  
C 2.788225472 -3.760936191 -1.784452614  
H 2.920379630 -3.348010968 -2.779427266  
C 2.721536909 -0.607305350 -2.450931122  
C 3.518432068 0.299574536 -3.165370331  
H 4.484320724 0.603158404 -2.772473295  
C 3.080385026 0.805515988 -4.391789735  
H 3.707504104 1.503165110 -4.938412090  
C 1.850911437 0.408329030 -4.919474473  
H 1.515633129 0.798727637 -5.875234666  
C 1.056832369 -0.503120146 -4.216839707  
H 0.106942190 -0.830435283 -4.630100350  
C 1.481636200 -0.999383737 -2.985084308  
H 0.858520876 -1.709667798 -2.4449601828

=====

20A-TS2

=====

C -0.161487218 -0.066312725 -0.040574695  
C 0.015214855 0.046617195 2.225481198  
Rh 1.823487450 0.040044079 1.065464314  
P 4.113534419 0.412300465 1.359223506  
C 2.116020476 -1.776149014 0.348544050  
C 1.055506459 -2.244390776 -0.318721512  
C -0.271936149 -1.526665215 -0.351705939  
C -0.749724080 -1.925674565 -1.775269365  
C 0.959383434 -3.400864779 -1.304421770  
O -0.341708999 -3.283643801 -1.878259417  
H -1.098338835 0.435410911 0.161962453  
H 0.443606866 0.508912272 -0.756899226  
H 3.075040984 -2.279824167 0.436727596  
H 1.743830853 -3.320118328 -2.072713185  
H 1.042051263 -4.383909283 -0.828600224  
H -1.833097976 -1.880427200 -1.899052142  
H -0.266947604 -1.293430986 -2.539231106  
H -0.959596328 -1.994136617 0.364233192  
C 1.111745780 -0.083928435 2.909123615  
C 1.668039974 -0.214043834 4.269567290  
C -1.426022853 0.060388326 2.570119056  
H 2.020887091 -1.236032149 4.441965094  
H 2.514189386 0.464505944 4.412029291  
H 0.883309002 0.016882527 4.997188067  
C 4.835104763 1.059350125 -0.188470129  
C 5.645755319 2.203866908 -0.212632724  
H 5.846999124 2.752216642 0.702087638

C 6.198253570 2.637964268 -1.418455003  
H 6.827030880 3.523217827 -1.432980520  
C 5.947050409 1.937903064 -2.599792790  
H 6.379184793 2.280124644 -3.535381512  
C 5.139996954 0.797369565 -2.579947007  
H 4.944949446 0.251109287 -3.497965177  
C 4.582357031 0.359152162 -1.380932383  
H 3.957301183 -0.530243508 -1.369931020  
C 4.300656818 1.724293076 2.612262417  
C 3.545419453 2.900138237 2.454103095  
H 2.918411928 3.033083396 1.574918495  
C 3.611976362 3.908994968 3.412149001  
H 3.031852087 4.817497955 3.281186971  
C 4.426112912 3.750222519 4.537584150  
H 4.476372911 4.536131103 5.285191676  
C 5.177041959 2.584997281 4.698848205  
H 5.813669662 2.463369068 5.570143351  
C 5.117763183 1.570604472 3.740674591  
H 5.706002289 0.667810826 3.870808959  
C 5.181118800 -0.968997164 1.876321773  
C 6.543675573 -0.990133471 1.538756111  
H 6.965100877 -0.204444928 0.918970598  
C 7.358057550 -2.023908607 1.999150514  
H 8.411411714 -2.037029009 1.735932067  
C 6.821724262 -3.040248813 2.793296806  
H 7.459304939 -3.844567613 3.147929682  
C 5.465485564 -3.027589151 3.125903834  
H 5.045869671 -3.821620272 3.736326353  
C 4.645832485 -1.997170350 2.667403368  
H 3.588310151 -1.995419401 2.911234381  
O -2.345737205 -0.240641386 1.838017517  
O -1.559455845 0.435578976 3.852821633  
C -2.919616572 0.448141012 4.354825225  
H -2.841928266 0.795700767 5.383662375  
H -3.534440031 1.125688482 3.758926324  
H -3.344945630 -0.556985897 4.312925308

=====

20B-TS1

=====

C 0.116776787 -0.124578693 -0.090506964  
C -0.122415748 0.099439719 1.838285749  
C 2.864260636 -0.103247398 0.253221752  
C 0.947601927 0.044161018 2.547811133  
Rh 1.369746783 -1.336904461 1.002445866  
P 1.574207854 -3.014365944 -0.716313398  
C 0.823840122 0.873575279 -0.667017764  
C 2.194994403 1.196593993 -0.155647512  
C 2.776365847 1.977179021 -1.365080490  
C 0.558933686 1.719370732 -1.888066057  
O 1.643872026 2.642344335 -1.918594890  
H 3.571999912 -0.011274356 1.083723154  
H 3.305553172 -0.621485934 -0.598513883  
H -0.825627355 -0.522016590 -0.454514119  
H 0.544772800 1.087640053 -2.791166629  
H -0.382822831 2.277143824 -1.839083570  
H 3.515086263 2.733032430 -1.092498487  
H 3.221978983 1.274897448 -2.088534690  
H 2.095139290 1.868972031 0.710708905  
C 1.649567706 0.401862047 3.797252380  
C -1.593225994 -0.005566642 2.017761312  
H 2.390256018 1.186844217 3.604802585

H 0.935712691 0.778020048 4.538220962  
H 2.180758432 -0.457408941 4.217001447  
O -2.307169371 -0.769325409 1.400672893  
O -1.984754409 0.825525178 2.985156853  
C -3.397193959 0.775966959 3.315833596  
H -3.533238922 1.520433414 4.098401303  
H -3.996633737 1.019283873 2.435971966  
H -3.663812350 -0.221002107 3.673596610  
C 2.737063754 -4.314864610 -0.173046412  
C 3.893937791 -3.899099959 0.512301108  
H 4.082246251 -2.839151851 0.675223844  
C 4.819276488 -4.835497387 0.970429047  
H 5.712506356 -4.504270998 1.491611446  
C 4.590424352 -6.197056410 0.761619380  
H 5.306538404 -6.928953005 1.122653664  
C 3.438209506 -6.617204647 0.094376083  
H 3.257096586 -7.676271962 -0.062354556  
C 2.512294153 -5.683884915 -0.372937140  
H 1.616451743 -6.023104721 -0.882193864  
C -0.016840279 -3.792816758 -1.146259278  
C -1.138315453 -3.577044295 -0.330274343  
H -1.079970924 -2.930815485 0.541592453  
C -2.362481514 -4.166018146 -0.650081400  
H -3.225287872 -3.982193439 -0.017443592  
C -2.476104191 -4.973959288 -1.782250251  
H -3.429032392 -5.431313139 -2.030527366  
C -1.365573236 -5.184184968 -2.605658299  
H -1.454381249 -5.803461130 -3.493220484  
C -0.142340857 -4.592849976 -2.296235512  
H 0.710741440 -4.741934721 -2.952074021  
C 2.214694436 -2.342870085 -2.295414312  
C 1.328437468 -1.661998509 -3.147992420  
H 0.263711656 -1.656078028 -2.933888762  
C 1.806493205 -1.006941524 -4.282364837  
H 1.110734118 -0.496255901 -4.941892560  
C 3.173772521 -1.009870044 -4.574061479  
H 3.544289370 -0.495403560 -5.455275000  
C 4.057332781 -1.689931127 -3.734641486  
H 5.118824143 -1.710719453 -3.963055788  
C 3.583492703 -2.355209752 -2.600858272  
H 4.282048386 -2.889372268 -1.964026309

=====

20B-TS2

=====

C -0.213899808 -0.127039776 0.033517850  
C -0.017610923 0.001137792 2.323890093  
Rh 1.824371013 -0.015037807 1.052670851  
P 4.131151951 0.281011567 1.361513387  
C 2.085182540 -1.831334040 0.333111604  
C 1.007529453 -2.300173694 -0.302597749  
C -0.325733125 -1.589127465 -0.290533565  
C -0.840172874 -1.983282265 -1.701856864  
C 0.883515547 -3.458353019 -1.282771873  
O -0.432751886 -3.338463875 -1.825145819  
H -1.147871939 0.381139964 0.245935378  
H 0.337931469 0.448827122 -0.723679263  
H 3.044994925 -2.335689714 0.403453172  
H 1.647719977 -3.383850770 -2.070993216  
H 0.973459237 -4.440249036 -0.806030474  
H -1.926637933 -1.940744164 -1.802463921  
H -0.378432800 -1.342255435 -2.471350647

H -0.977007757 -2.090736037 0.438904929  
C 1.136779241 -0.143586176 2.884832565  
C -1.459417108 0.100074417 2.635807188  
C 1.787135737 -0.249658216 4.206839406  
H -1.887393842 1.038916631 2.269653668  
H -2.026188275 -0.727764839 2.195811458  
H -1.571382311 0.064533133 3.724374323  
C 4.442172796 1.389112767 2.773762067  
C 5.373091712 1.072413468 3.770611228  
H 5.951826320 0.157335159 3.706444400  
C 5.546749489 1.931929311 4.856300988  
H 6.272780094 1.684321463 5.625009255  
C 4.792378469 3.102207130 4.956190669  
H 4.933088485 3.768815883 5.802013801  
C 3.859776617 3.420786182 3.964289556  
H 3.275850460 4.333571488 4.035714114  
C 3.683154989 2.567452800 2.877274591  
H 2.965828035 2.827311149 2.101571670  
C 5.232419178 -1.159448547 1.536929243  
C 4.855029295 -2.221751233 2.375683357  
H 3.913626578 -2.178795275 2.911310439  
C 5.710470414 -3.310000420 2.542267024  
H 5.418362019 -4.126875319 3.195441122  
C 6.937229396 -3.349637636 1.875583666  
H 7.599522204 -4.200275496 2.007401499  
C 7.313336098 -2.296110677 1.040404866  
H 8.267196300 -2.323929774 0.522490211  
C 6.465885967 -1.202322455 0.867387300  
H 6.765938575 -0.387407719 0.216722370  
C 4.702571604 1.158532467 -0.137419720  
C 5.439719894 2.349489194 -0.081735923  
H 5.691611718 2.792897651 0.876043231  
C 5.858625610 2.963345518 -1.263180256  
H 6.432863523 3.883718822 -1.215147321  
C 5.547766719 2.396570581 -2.500211809  
H 5.877300699 2.878072482 -3.415897444  
C 4.815937111 1.207541709 -2.561209847  
H 4.578901242 0.760997641 -3.522258663  
C 4.392151150 0.590568816 -1.386458418  
H 3.834286431 -0.341868100 -1.438102414  
O 2.846388615 -0.806958628 4.402413987  
O 1.061151184 0.379535935 5.138026958  
C 1.654601317 0.412082203 6.461482774  
H 0.949528408 0.966052985 7.078994675  
H 1.792585410 -0.603457319 6.839668589  
H 2.621022181 0.919776654 6.417639362

=====  
21A

=====  
Rh 0.559018909 1.354067581 0.975842941  
C -0.479022585 -0.539612224 -0.290857704  
C 0.752363575 2.495277634 -0.718325770  
C 0.488862164 0.039209046 -1.066505481  
C 0.458323851 1.425499650 -1.754831555  
C 1.548082706 1.237069139 -2.850389033  
C 1.654011115 -0.710520531 -1.684646180  
O 1.733863612 -0.166336318 -2.991992243  
H 0.041965681 3.320101454 -0.681207228  
H 1.789424906 2.848438660 -0.725917475  
H -0.382337288 -1.606252813 -0.080687668  
H 2.585837485 -0.531284774 -1.117657165

H 1.491160165 -1.788968579 -1.757110371  
H 1.256980410 1.640318631 -3.822205965  
H 2.487572077 1.719369409 -2.532902236  
H -0.535942140 1.572857438 -2.190815449  
C -1.684627983 0.136238443 0.249561777  
C -1.397807599 1.326416294 0.830417926  
C -3.016771534 -0.553958338 0.145254414  
C -2.361211979 2.323372268 1.355398386  
P 1.049076564 2.930410707 2.555131970  
H -3.800253118 0.024642471 0.633138740  
H -3.279400806 -0.721637144 -0.905811143  
H -2.959513575 -1.540358386 0.622422849  
C 0.617197343 2.356737868 4.228665550  
C 1.530399272 2.499618761 5.287016669  
H 2.512554110 2.926569551 5.108728153  
C 1.174831310 2.090475659 6.570625373  
H 1.883083595 2.202417767 7.386042255  
C -0.087025527 1.539198737 6.806719268  
H -0.359474337 1.220357273 7.808306261  
C -0.997220403 1.395794872 5.757908405  
H -1.978037169 0.967189407 5.939574344  
C -0.649624505 1.799781915 4.469283094  
H -1.369240628 1.681796211 3.665784766  
C 2.860301571 2.746091414 2.392703359  
C 3.695330178 3.770383936 1.922346491  
H 3.303226797 4.770206084 1.769170026  
C 5.041456939 3.508864588 1.668093129  
H 5.685697372 4.309486666 1.317166556  
C 5.563945205 2.228528171 1.868309821  
H 6.612596505 2.032749850 1.666135805  
C 4.741239726 1.204415946 2.341816163  
H 5.147709060 0.213029795 2.517631951  
C 3.395210124 1.457943226 2.605535133  
H 2.770525565 0.667269845 3.015656399  
C 0.639834991 4.700667417 2.467603086  
C 0.162366188 5.375854179 3.600781055  
H 0.023148961 4.845753549 4.536831513  
C -0.135257699 6.737324057 3.528246257  
H -0.501776322 7.253476155 4.410342351  
C 0.037735559 7.432023178 2.330752879  
H -0.193601644 8.491639965 2.278202541  
C 0.508835086 6.762433856 1.197429915  
H 0.644317489 7.299157105 0.263266745  
C 0.804545885 5.402601223 1.261662961  
H 1.168553679 4.896273287 0.376025485  
O -1.918042143 3.581660191 1.185211869  
O -3.413213091 2.036916784 1.894600154  
C -2.771740393 4.626025077 1.704885831  
H -3.725809428 4.633758410 1.172948700  
H -2.221497616 5.551400583 1.542831379  
H -2.955636545 4.467167842 2.769851645

=====  
21B

=====  
Rh 0.429295715 1.322757464 1.066960889  
C -0.980007080 -0.325519325 -0.163502171  
C 0.932478680 2.307623000 -0.659846652  
C 0.115599090 -0.034265347 -0.927773874  
C 0.445989486 1.283744372 -1.669885620  
C 1.514815741 0.790870053 -2.688996812  
C 1.085000797 -1.072144381 -1.461489173

O 1.360058624 -0.619653876 -2.777534052  
H 0.439860131 3.279071056 -0.706187800  
H 2.021599516 2.421749913 -0.621510782  
H -1.152114586 -1.369286441 0.093939334  
H 2.006348071 -1.109274740 -0.851363769  
H 0.660504623 -2.078236746 -1.512179722  
H 1.384013785 1.209990342 -3.688485448  
H 2.524913445 1.045997870 -2.326884226  
H -0.461801281 1.633078770 -2.173617794  
C -1.983390395 0.656102127 0.314158923  
C -1.478495032 1.776056646 0.891769771  
C -3.441487644 0.340881911 0.213693198  
C -2.148865899 3.032101956 1.321881997  
H -2.050807526 3.192827544 2.400323542  
H -1.680435386 3.895294115 0.836447866  
H -3.210650358 2.993199239 1.065187167  
P 1.199346474 2.881077839 2.568721108  
C 0.858291462 2.290527819 4.260686849  
C 1.792691814 2.487499390 5.290197898  
H 2.732437782 2.991377279 5.086053052  
C 1.516085732 2.025880326 6.575750754  
H 2.240988668 2.178192260 7.369615271  
C 0.313616609 1.365803197 6.841743504  
H 0.105261840 1.003696551 7.844004941  
C -0.618603567 1.166809754 5.821660935  
H -1.552385507 0.652525074 6.027542136  
C -0.349106140 1.625168039 4.532433502  
H -1.079325926 1.465385469 3.743133613  
C 3.012408918 2.815534423 2.370793175  
C 3.817287107 3.946212415 2.180244886  
H 3.381631195 4.939443128 2.195066179  
C 5.190710286 3.794570191 1.978349958  
H 5.811477929 4.673981308 1.836022152  
C 5.766563492 2.523429924 1.963076647  
H 6.834835560 2.413082837 1.803322649  
C 4.970655392 1.391981091 2.162571877  
H 5.417444447 0.402349931 2.165313543  
C 3.600591283 1.535857751 2.367433480  
H 2.992919921 0.651674999 2.556915078  
C 0.667455193 4.617271929 2.463911503  
C -0.031923749 5.219250901 3.519806429  
H -0.213935070 4.670737806 4.438368296  
C -0.497122576 6.528984334 3.390740920  
H -1.038106784 6.988333087 4.212378244  
C -0.267454892 7.245535177 2.215549272  
H -0.631174305 8.263774044 2.119174626  
C 0.437274175 6.652403537 1.163674853  
H 0.627220363 7.209791370 0.251388646  
C 0.899547474 5.343324410 1.282011617  
H 1.454607579 4.896800020 0.463078931  
O -4.343969221 1.075796853 0.560822438  
O -3.623879682 -0.887445149 -0.306312746  
C -5.000312157 -1.312455726 -0.428701904  
H -4.958778648 -2.310890303 -0.861879467  
H -5.478546395 -1.333210403 0.553558181  
H -5.549861347 -0.628141700 -1.079100636

=====  
23A

=====  
Rh -0.568687356 1.994153272 1.000605922  
P 0.795487008 2.247131181 2.787598270

C -0.095595233 0.120854759 0.653693154  
C 0.351971817 -0.362083138 -0.506870590  
C 0.975824271 0.356211888 -1.691566026  
C 1.703313331 -0.820832033 -2.378082049  
C 0.393817273 -1.859037674 -0.834264611  
O 0.859309283 -1.944115808 -2.170961153  
C 0.071971617 1.427104459 4.248997330  
C 0.562461825 1.789846922 5.516813820  
H 1.343877023 2.538687374 5.606658152  
C 0.044030036 1.191639200 6.661842482  
H 0.430950198 1.472445653 7.636672011  
C -0.974844156 0.240335663 6.556973080  
H -1.380698974 -0.219562478 7.452839460  
C -1.475313596 -0.113151302 5.303872053  
H -2.272565997 -0.845153709 5.220239928  
C -0.953472211 0.475179879 4.150780317  
H -1.360285677 0.187985236 3.187193918  
C 2.502397087 1.656147598 2.602756197  
C 2.974911357 0.584121825 3.374114250  
H 2.330650274 0.102000450 4.101412978  
C 4.285869974 0.136148783 3.209874308  
H 4.646966107 -0.694009516 3.809187414  
C 5.129241286 0.752503689 2.285161841  
H 6.149708518 0.402129081 2.163385846  
C 4.660318644 1.818387438 1.512285288  
H 5.312386056 2.296192933 0.787522692  
C 3.349727022 2.265151178 1.660647266  
H 2.983488575 3.075652454 1.038162164  
C 0.824452091 4.010289254 3.249216125  
C 1.987977302 4.792047493 3.267354283  
H 2.952676735 4.356605778 3.035463044  
C 1.909995731 6.143633389 3.607917516  
H 2.814784883 6.743502239 3.623503632  
C 0.681386351 6.719957792 3.932067916  
H 0.627772810 7.772093235 4.194379084  
C -0.479358516 5.940425470 3.929779503  
H -1.434946655 6.382182856 4.195002547  
C -0.410460358 4.592852201 3.590317824  
H -1.314229404 3.988158603 3.605050740  
H -0.389910523 -0.554529386 1.462039595  
H 1.081905175 -2.364873111 -0.134695995  
H -0.583082857 -2.348045495 -0.771091108  
H 1.835731240 -0.681366355 -3.453168493  
H 2.694090071 -0.974695007 -1.914788813  
H 0.180522807 0.702944843 -2.365866846  
C 0.380460368 3.194719578 -0.207029317  
C 1.264261963 2.879409332 -1.171747209  
C 1.917429319 1.515804280 -1.330854910  
C -0.319959876 4.490852156 0.093908601  
C 1.588804495 3.959343058 -2.168780381  
H 2.435366434 1.251265137 -0.403817643  
H 2.677251073 1.597811894 -2.109716768  
H -1.161582437 4.350443256 0.799593265  
H 0.363777570 5.204668793 0.560911269  
H -0.723936735 4.938636581 -0.817355159  
O 1.396186333 5.149496223 -1.999784231  
O 2.112248377 3.446090932 -3.298139295  
C 2.434547452 4.407763376 -4.325963912  
H 2.838588527 3.824409139 -5.152499802  
H 1.535841328 4.947549824 -4.633682245  
H 3.171826653 5.124959943 -3.957491905

```

=====
23B
=====
Rh -0.32800000 2.22910000 0.98380000
P 0.99670000 2.28040000 2.81280000
C -0.22070000 0.30480000 0.60370000
C 0.22730000 -0.30710000 -0.49660000
C 1.18410000 0.18460000 -1.56580000
C 1.75200000 -1.16040000 -2.06150000
C -0.10750000 -1.75480000 -0.86410000
O 0.64300000 -2.04620000 -2.03810000
C 0.06110000 1.37820000 4.09570000
C -0.47660000 2.04720000 5.20760000
H -0.31920000 3.11130000 5.34040000
C -1.20730000 1.33800000 6.16020000
H -1.61680000 1.86220000 7.01810000
C -1.40530000 -0.03570000 6.01720000
H -1.97480000 -0.58240000 6.76240000
C -0.86700000 -0.70890000 4.91700000
H -1.01160000 -1.77910000 4.80690000
C -0.14320000 -0.00820000 3.95630000
H 0.27680000 -0.53910000 3.10900000
C 2.67030000 1.57170000 2.69810000
C 3.08900000 0.50370000 3.50460000
H 2.40990000 0.04540000 4.21360000
C 4.39930000 0.03170000 3.40980000
H 4.71470000 -0.79750000 4.03550000
C 5.30080000 0.62610000 2.52740000
H 6.31930000 0.25650000 2.45970000
C 4.89430000 1.70510000 1.73750000
H 5.59560000 2.17890000 1.05740000
C 3.58690000 2.17540000 1.81840000
H 3.27740000 3.01440000 1.20420000
C 1.22750000 3.99000000 3.41900000
C 2.47400000 4.43320000 3.89260000
H 3.33280000 3.77260000 3.88970000
C 2.61520000 5.73260000 4.37910000
H 3.58280000 6.06520000 4.74210000
C 1.52040000 6.59710000 4.40490000
H 1.63570000 7.60840000 4.78310000
C 0.27420000 6.15800000 3.95010000
H -0.58340000 6.82320000 3.97660000
C 0.12530000 4.86300000 3.45820000
H -0.84520000 4.53880000 3.10150000
H -0.85740000 -0.25230000 1.30220000
H 0.17150000 -2.42540000 -0.03480000
H -1.16870000 -1.90920000 -1.08630000
H 2.13950000 -1.12140000 -3.08260000
H 2.55910000 -1.50190000 -1.38920000
H 0.59780000 0.61720000 -2.39000000
C 0.92270000 3.12560000 -0.28150000
C 1.84110000 2.63090000 -1.13550000
C 2.26230000 1.17370000 -1.09850000
C 0.39290000 4.48030000 -0.08000000
C 2.50900000 3.45760000 -2.20770000
H 2.56040000 0.89830000 -0.08290000
H 3.14580000 1.05910000 -1.73630000
H 3.59090000 3.48640000 -2.02260000
H 2.37430000 2.96270000 -3.17740000
H 2.13780000 4.47740000 -2.27270000
O 0.98820000 5.53230000 -0.61300000

```

```

O -0.59950000 4.56810000 0.67070000
C 0.42990000 6.83280000 -0.27790000
H 0.45930000 6.97750000 0.80390000
H -0.60030000 6.90040000 -0.63220000
H 1.06630000 7.55320000 -0.78850000

```

```

=====
21A-TS
=====
C -0.336425994 0.229028048 0.102433452
C -0.008296671 -0.015671624 2.117656258
Rh 1.694568737 0.009382272 1.056100558
C 0.847150749 -2.143226167 1.544158942
C 0.830780393 -1.958704339 0.175442417
C -0.212632599 -1.125376281 -0.572560221
C 0.402155985 -1.134366875 -1.987460461
C 1.611403038 -2.742220816 -0.864913082
O 1.008799222 -2.414431681 -2.112449263
H -1.337350402 0.470634604 0.445179174
H 0.036390140 1.090074967 -0.452954021
H 1.445777271 -2.955431601 1.957396959
H 2.676128110 -2.462327030 -0.849468799
H 1.538731647 -3.825902591 -0.717825525
H -0.333984269 -1.028529476 -2.786993861
H 1.151675623 -0.328522732 -2.077413181
H -1.165113375 -1.671446670 -0.582207301
C 0.068949975 -1.335760627 2.500495036
C -0.404692449 -1.957060848 3.783130808
C -0.593824005 1.117124936 2.877618669
P 2.577265143 2.092250015 1.145485759
H -0.775997160 -1.205277824 4.476416777
H -1.203044302 -2.680309256 3.574553896
H 0.414186909 -2.515504230 4.252206852
C 3.200614637 2.790208817 2.697622137
C 4.330829129 3.626244634 2.697527307
H 4.847601567 3.848660681 1.767774844
C 4.786058132 4.175641351 3.893999220
H 5.660312837 4.819598924 3.893882428
C 4.118610086 3.897673817 5.090656636
H 4.475052063 4.330358279 6.020647845
C 3.000069009 3.062491791 5.094959455
H 2.485754050 2.842219144 6.025429694
C 2.540418670 2.503131914 3.902120470
H 1.679594267 1.843002287 3.915282589
C 3.888997582 1.145161787 0.301525312
C 4.291335884 1.303902278 -1.040118331
H 4.027909066 2.206568168 -1.581305995
C 5.031632535 0.308237041 -1.664504563
H 5.353013453 0.445587140 -2.692698940
C 5.366794844 -0.874180130 -0.982922293
H 5.938284100 -1.645647956 -1.489359831
C 4.998086118 -1.038526509 0.346610535
H 5.294681633 -1.927732817 0.894580431
C 4.261296774 -0.035522679 1.003141912
H 4.104979583 -0.105213295 2.079247050
C 1.981636493 3.451848828 0.104556320
C 1.870622444 4.756885860 0.609476440
H 2.195135261 4.983106740 1.619479727
C 1.343503489 5.772136441 -0.189245359
H 1.265222956 6.779861453 0.207393603
C 0.922544690 5.497701244 -1.491095619
H 0.514733067 6.291702381 -2.109317077

```

C 1.024576788 4.199993845 -1.998239308  
H 0.697695217 3.982694182 -3.010595804  
C 1.543281763 3.179301594 -1.204731761  
H 1.616014685 2.173534973 -1.607468074  
O -0.595152054 2.253538151 2.149130142  
O -0.980386549 1.058408137 4.029246218  
C -1.057563273 3.436960163 2.834863436  
H -2.086893380 3.305900372 3.176128889  
H -0.986869861 4.238455066 2.100427238  
H -0.417332969 3.645297526 3.696102185

=====

21B-TS

=====

C -0.696811262 0.227366114 0.437428350  
C -0.045150363 -0.288298875 2.296642363  
Rh 1.465300605 0.194299605 1.061159955  
C 1.021072261 -2.120262963 1.181630661  
C 0.778616386 -1.681961891 -0.105647540  
C -0.484312516 -0.925415805 -0.528999065  
C -0.104134697 -0.557947146 -1.977810248  
C 1.502587546 -2.095842244 -1.373452364  
O 0.666472345 -1.658676496 -2.441786007  
H -1.652274308 0.195400574 0.955877848  
H -0.570048651 1.234941350 0.038982288  
H 1.781605301 -2.877943879 1.356768021  
H 2.499730289 -1.631978461 -1.431978482  
H 1.624062967 -3.182979486 -1.450373801  
H -0.963288440 -0.441860318 -2.641870917  
H 0.488699272 0.373687347 -1.988477199  
H -1.333189088 -1.621425855 -0.536207500  
C 0.266282321 -1.631790603 2.342291364  
C 0.045960688 -2.465738389 3.551446248  
C -0.770383275 0.528381007 3.316834022  
H -0.267794929 0.431593920 4.283720902  
H -0.812810496 1.579923600 3.023873995  
H -1.787261122 0.151430232 3.470120778  
P 2.171029740 2.340161403 1.383188035  
C 3.015805085 2.893387376 2.888235220  
C 4.223112694 3.608011819 2.809532558  
H 4.666083999 3.829303254 1.842427653  
C 4.854798268 4.030223147 3.977800503  
H 5.789288031 4.579666763 3.916422643  
C 4.288228678 3.745466612 5.223927013  
H 4.784001164 4.075959009 6.131481516  
C 3.089961044 3.032594933 5.304016207  
H 2.653107148 2.807183804 6.271983942  
C 2.453746610 2.601579350 4.139660675  
H 1.527995666 2.038196033 4.202046671  
C 3.406228004 1.604512207 0.259846994  
C 3.568027654 1.926030985 -1.104531512  
H 3.111553264 2.824582187 -1.506514536  
C 4.321233273 1.098236649 -1.925458758  
H 4.457842380 1.359648584 -2.970663818  
C 4.907973812 -0.074360948 -1.418624648  
H 5.490241971 -0.712155377 -2.076670905  
C 4.764616139 -0.404611251 -0.077227529  
H 5.243399413 -1.291202783 0.327006646  
C 4.015155663 0.427080381 0.774453050  
H 4.021023870 0.238324573 1.846835688  
C 1.372818349 3.768455476 0.602586087  
C 1.377412583 5.031027824 1.214931328

H 1.894153494 5.180614418 2.157290763  
C 0.716821624 6.100135957 0.609134282  
H 0.724793611 7.074886644 1.086976057  
C 0.050823361 5.920949596 -0.604119404  
H -0.461064088 6.756875268 -1.071137946  
C 0.040213242 4.665570180 -1.217756019  
H -0.475778343 4.523612140 -2.162550701  
C 0.690481192 3.591186495 -0.615976431  
H 0.683274615 2.619860442 -1.101185608  
O -0.579597127 -2.099663259 4.528238713  
O 0.632978872 -3.672107699 3.432062701  
C 0.478226648 -4.550496205 4.568999395  
H 0.997407539 -5.469453973 4.300073173  
H 0.921479596 -4.099421013 5.460122394  
H -0.580885680 -4.742449173 4.755989491

=====

23A-TS

=====

C -0.194387178 -0.028394008 0.070470186  
C 0.086515421 -0.016852101 2.094489241  
Rh 1.713165760 0.046949293 0.819096358  
P 2.416395363 2.139312613 0.844604388  
C -0.282674475 -1.291982810 -0.358425963  
C 0.538176185 -2.352059170 0.368269966  
C 0.345346594 -3.587407422 -0.557858860  
C -1.018008754 -1.987735729 -1.479048776  
O -0.164356830 -3.086184062 -1.787873908  
C 3.970957965 1.298779176 0.398943889  
C 5.027855849 1.110395349 1.314082060  
H 5.004126376 1.605958793 2.279188090  
C 6.108495388 0.306267419 0.967377035  
H 6.929285933 0.179067861 1.666322349  
C 6.144167663 -0.333933414 -0.277542031  
H 6.992757890 -0.959203004 -0.538106573  
C 5.100710003 -0.165789768 -1.187563604  
H 5.134782522 -0.652675420 -2.157257832  
C 4.014604304 0.649747489 -0.861305907  
H 3.232271963 0.827911423 -1.594037565  
C 1.967349940 3.308554485 -0.463188464  
C 2.951158976 3.873846517 -1.291017657  
H 3.995913812 3.607539776 -1.163423845  
C 2.583274394 4.783711747 -2.281886571  
H 3.345433078 5.219605446 -2.920870788  
C 1.242201235 5.133189001 -2.449908435  
H 0.960036375 5.841268989 -3.223130672  
C 0.261600253 4.574911513 -1.625102057  
H -0.780828472 4.848890195 -1.755187562  
C 0.619169327 3.663202854 -0.634350319  
H -0.148040973 3.235855035 0.004576124  
C 2.615031014 3.052960809 2.393049880  
C 2.651377384 4.456326217 2.408266120  
H 2.534858190 5.018781360 1.487319563  
C 2.839300806 5.129547602 3.615620348  
H 2.867531620 6.214850410 3.625639323  
C 2.987814251 4.413519582 4.805252027  
H 3.129852799 4.943195322 5.742303496  
C 2.945166657 3.015505089 4.793778331  
H 3.048998871 2.457840373 5.719335829  
C 2.754244895 2.333885507 3.594394388  
H 2.698937827 1.248286861 3.587137292  
H -0.762970218 0.834793275 -0.258400331

H -2.012234361 -2.332657761 -1.144253905  
H -1.142536730 -1.378023205 -2.376672791  
H 1.266537759 -4.132942220 -0.772004609  
H -0.373224020 -4.279127198 -0.088829343  
H 1.629889404 -2.096821477 0.397405144  
C -0.136520468 -1.264458877 2.603360363  
C 0.053348484 -2.547582645 1.817012671  
C -0.432567709 1.266598836 2.689844935  
C -0.723240410 -1.405990395 3.968672081  
H -0.912883617 -3.069143135 1.812014150  
H 0.742458013 -3.223858913 2.335165767  
H 0.180117192 1.578850197 3.537799909  
H -0.427276654 2.070595852 1.951172141  
H -1.450325397 1.140677201 3.066884589  
O -1.043648257 -2.692671419 4.230208329  
O -0.876315099 -0.506329991 4.775231977  
C -1.593717764 -2.937641964 5.540397774  
H -1.785691593 -4.009322711 5.580534340  
H -0.880991538 -2.641275997 6.313962105  
H -2.518773854 -2.372593297 5.677014078

23B-TS

C -0.137816331 -0.028189601 0.021014276  
C -0.063284927 0.028486806 2.034464589  
Rh 1.700759558 0.015720227 0.931872548  
P 2.385654605 2.113031725 0.900852805  
C -0.176392445 -1.296903605 -0.401264816  
C 0.451063051 -2.364687285 0.488987373  
C 0.354897728 -3.625398683 -0.416253216  
C -0.725018768 -1.998590627 -1.621241658  
O 0.110831078 -3.148730930 -1.733390152  
C 3.974058499 1.272192358 0.605552878  
C 5.008619354 1.203044917 1.561882110  
H 4.953033671 1.801543116 2.465046291  
C 6.107876330 0.383473573 1.334474994  
H 6.912968532 0.350907072 2.062212937  
C 6.184173242 -0.395721194 0.172206406  
H 7.047392338 -1.033263613 0.006836538  
C 5.165600745 -0.345782946 -0.777133950  
H 5.232581569 -0.935538443 -1.685939099  
C 4.061649280 0.489343349 -0.574736383  
H 3.310016522 0.588579837 -1.353466500  
C 2.027945916 3.223529516 -0.483243379  
C 3.073369032 3.698324506 -1.293768035  
H 4.098744182 3.396446332 -1.104772812  
C 2.791666733 4.570028493 -2.344667884  
H 3.600339085 4.939130292 -2.968164093  
C 1.476204218 4.968005073 -2.590722513  
H 1.260855357 5.646555353 -3.410740605  
C 0.437856723 4.498691999 -1.782524067  
H -0.583936400 4.813124644 -1.972063810  
C 0.704173660 3.627214864 -0.727712277  
H -0.098245532 3.274642786 -0.089235135  
C 2.473864754 3.081547010 2.425897659  
C 2.416065135 4.483951247 2.399695648  
H 2.278115363 5.008807073 1.460096839  
C 2.536445014 5.202122615 3.589059756  
H 2.492312698 6.286635443 3.568884774  
C 2.716805418 4.530117013 4.800392096  
H 2.813759738 5.094805309 5.722940772

C 2.764905282 3.133566849 4.830134888  
H 2.892344054 2.611099104 5.773249311  
C 2.633319592 2.406779047 3.649269492  
H 2.641602463 1.320976454 3.673134412  
H -0.625216950 0.853663569 -0.374375347  
H -1.781552051 -2.285714908 -1.476121476  
H -0.644325813 -1.417586238 -2.542628938  
H 1.264851704 -4.228554458 -0.438281068  
H -0.477974515 -4.258636152 -0.068106008  
H 1.531782907 -2.168353532 0.717394992  
C -0.545034595 -1.142272035 2.537882892  
C -0.302967668 -2.457653479 1.828887725  
C -0.444652080 1.388423861 2.513460678  
C -1.470000326 -1.260805123 3.723829196  
H -1.285041690 -2.924746392 1.660926568  
H 0.236078098 -3.138672438 2.501002405  
H -1.042624203 -1.948875260 4.463656815  
H -2.424126084 -1.699744233 3.403180974  
H -1.663150920 -0.311073099 4.216088916  
O -0.376189226 1.526505956 3.846751947  
O -0.744184485 2.309358530 1.770489750  
C -0.724958648 2.838029809 4.353247539  
H -1.756139383 3.082836649 4.089481690  
H -0.052412085 3.590759689 3.937629909  
H -0.606053653 2.768547029 5.433439312

22

C 0.067344073 -0.012906702 0.044778950  
C 0.027496114 -0.019349106 1.578193726  
Rh 2.065409657 -0.029276315 2.181782171  
C 1.342039311 -2.073485384 1.757035264  
C 1.882418810 -1.739376125 0.529291264  
C 1.110690209 -0.988445001 -0.527226617  
C 2.279577854 -0.424171737 -1.348881841  
C 3.160989987 -2.203453460 -0.122264499  
O 3.252149794 -1.472025324 -1.347662139  
H -0.934253762 -0.252687626 -0.331120804  
H 0.272306769 1.004929359 -0.295753875  
H 1.770105536 -2.855300534 2.380651526  
H 4.030223487 -2.000493016 0.520904098  
H 3.148395201 -3.278494580 -0.349724748  
H 2.027265221 -0.200628268 -2.388610225  
H 2.674368248 0.488620469 -0.869531257  
H 0.617562869 -1.754553033 -1.143499341  
C 0.309263556 -1.218259459 2.335140408  
C -0.328027671 -1.643391382 3.630644235  
C -0.768342629 1.089373981 2.224818954  
P 2.499977050 1.872872000 3.378097242  
H -0.694482713 -0.794715353 4.201674615  
H -1.176588291 -2.302483935 3.403162973  
H 0.381341468 -2.214639083 4.236598967  
C 2.595864252 1.856284661 5.179764478  
C 3.799800964 2.115817430 5.855214828  
H 4.709045143 2.324324315 5.298002102  
C 3.823947797 2.096987971 7.249175290  
H 4.753258169 2.294614277 7.775330223  
C 2.655492381 1.824687072 7.965455747  
H 2.679169213 1.810751868 9.051327978  
C 1.458500416 1.567800928 7.292016241  
H 0.553072211 1.355285444 7.852830193



C 1.421399797 1.577375244 5.898516282  
H 0.494916823 1.374667807 5.367575518  
C 4.056518890 1.247579003 2.654818561  
C 4.555377656 1.735933662 1.421883152  
H 4.172718759 2.669426082 1.020646414  
C 5.534884841 1.025164763 0.737379528  
H 5.921545527 1.410642216 -0.201265390  
C 6.028393420 -0.183322492 1.249861125  
H 6.796902826 -0.725480091 0.707300872  
C 5.541351921 -0.684194366 2.454507396  
H 5.934262923 -1.611329303 2.861654848  
C 4.545078309 0.009439821 3.157323601  
H 4.219061657 -0.349760807 4.129926733  
C 2.150494235 3.546594964 2.785441529  
C 2.366146760 4.672416505 3.594783909  
H 2.739226993 4.554216435 4.608023475  
C 2.091718507 5.944352563 3.095089281  
H 2.259376099 6.816199975 3.720464766  
C 1.601431055 6.098008007 1.795602457  
H 1.387666468 7.091655619 1.412383374  
C 1.376910234 4.978072758 0.990711239  
H 0.985944217 5.097719946 -0.015544711  
C 1.643033966 3.702170764 1.484612429  
H 1.445849028 2.827631365 0.871832077  
O -1.256139023 1.932322756 1.300073399  
O -0.931002449 1.260362386 3.420734127  
C -1.970702353 3.079328816 1.813344870  
H -2.803421654 2.757598473 2.442309892  
H -2.330570908 3.612036086 0.933643481  
H -1.293406088 3.708352670 2.396349747

=====  
24

=====  
C -0.012244356 -0.034467050 0.040565421  
C -0.013847711 -0.045694020 1.569398642  
Rh 2.093842615 0.009579353 2.061093682  
C 1.424982002 -2.057459379 1.661947450  
C 1.878599976 -1.698535631 0.407696049  
C 1.028440136 -0.965639354 -0.601057910  
C 2.130076876 -0.354940398 -1.479111832  
C 3.127498996 -2.126197354 -0.318808115  
O 3.150753305 -1.355679084 -1.524745364  
H -1.024222664 -0.296885055 -0.296757016  
H 0.144735598 1.001259281 -0.284399463  
H 1.908822671 -2.823911918 2.258808092  
H 4.026443363 -1.932345143 0.283209443  
H 3.114212789 -3.193867377 -0.578541383  
H 1.816911701 -0.147178348 -2.505452585  
H 2.505911211 0.575562844 -1.021650005  
H 0.526816064 -1.742143582 -1.196844159  
C 0.403055111 -1.221005318 2.287425940  
C -0.038641110 -1.557585176 3.685811009  
C -0.968644145 0.962239078 2.163686549  
H -0.894204118 1.019298333 3.245500658  
H -0.781829699 1.950288390 1.734105093  
H -1.998539231 0.683555315 1.902229519  
P 2.541915854 1.906314827 3.258273966  
C 2.902693298 1.835692915 5.026252071  
C 4.091619032 2.368078422 5.553660031  
H 4.827946129 2.823651625 4.897363777  
C 4.325775245 2.303704070 6.925719466

H 5.243759398 2.712835632 7.336673076  
C 3.380960061 1.712503519 7.769476405  
H 3.567355469 1.665577153 8.838353764  
C 2.203311864 1.177646572 7.244074891  
H 1.474245680 0.713846226 7.901584095  
C 1.958867285 1.230944754 5.871630833  
H 1.051690864 0.796255098 5.460901300  
C 4.021255570 1.373768554 2.315002926  
C 4.288136159 1.845222557 1.005036559  
H 3.782574690 2.733765646 0.640867799  
C 5.208873584 1.184543327 0.196812521  
H 5.411169977 1.559499941 -0.801547109  
C 5.873950536 0.042051087 0.660563073  
H 6.591707927 -0.462229949 0.021565304  
C 5.617498787 -0.441792166 1.942705768  
H 6.141172661 -1.318434248 2.312084039  
C 4.684684931 0.199659368 2.768071690  
H 4.527240592 -0.153155477 3.783432869  
C 2.037472987 3.578142088 2.781230435  
C 2.195747070 4.676286907 3.639671092  
H 2.631784208 4.544488939 4.624675785  
C 1.783847642 5.942158092 3.225536108  
H 1.906841103 6.790997492 3.891165397  
C 1.214043859 6.119387286 1.963208770  
H 0.892970428 7.107576640 1.648017393  
C 1.046079257 5.026917160 1.108724187  
H 0.594262706 5.163055341 0.130803511  
C 1.446869211 3.757391121 1.518084284  
H 1.304170186 2.902692818 0.862279090  
O -0.433995146 -0.767109154 4.520520634  
O 0.074915025 -2.875312596 3.905028066  
C -0.289498059 -3.323530827 5.231885527  
H -0.139732234 -4.402092383 5.224066246  
H 0.349042025 -2.845657600 5.978978037  
H -1.332788244 -3.075954060 5.439240640

=====  
25

=====  
Rh 0.545618397 1.040419355 -0.407019467  
P -1.383807151 2.335991741 0.106776766  
P -0.319145517 0.341646547 -2.526900450  
C 2.688374684 0.334574590 -0.982015199  
C 2.054854737 -0.760631543 -0.444328826  
C 1.582072996 2.145355585 1.237582585  
C 1.233886905 1.073084543 1.745617101  
C 1.086389240 -0.155286708 2.557525932  
O 1.215587080 -1.340593371 1.793723208  
C 2.354395183 -1.325164874 0.934352593  
H 1.842946525 -0.122153148 3.359044208  
H 0.099803874 -0.193853945 3.029094762  
H 2.656244141 -2.371244542 0.816764365  
H 3.190202210 -0.788674169 1.402865849  
H 1.513047894 -1.445984102 -1.092345344  
H 2.000748679 3.122489652 1.099041821  
H 3.394896856 0.902920911 -0.384260377  
H 2.722946300 0.520068439 -2.048429718  
C 0.902694541 -0.300959518 -3.757932603  
C -1.496640022 -1.073119620 -2.375214502  
C -1.223624496 1.554701211 -3.588938835  
C -1.550298528 2.819970435 1.879655273  
C -1.458695658 3.971546402 -0.748326203  
C -3.052101745 1.600261067 -0.198100432  
H -1.487760424 3.841270293 -1.831531733  
H -2.345288346 4.530590429 -0.433302747

H -0.566786282 4.552169732 -0.499363358  
H -1.606074324 1.928695730 2.509308896  
H -0.694103994 3.414478000 2.200555141  
H -2.464279241 3.405712534 2.015697544  
H -3.216220092 1.394865224 -1.256927733  
H -3.141876403 0.661589119 0.355544461  
H -3.832228847 2.286228068 0.145631406  
H -2.115190801 1.938563814 -3.091272854  
H -0.566694952 2.395938147 -3.825816150  
H -1.529922890 1.075510642 -4.523923897  
H 1.560966893 0.505974315 -4.090830908  
H 1.514113053 -1.102087656 -3.337592295  
H 0.370095108 -0.693717710 -4.629116390  
H -2.350671146 -0.795065788 -1.755269400  
H -1.856222951 -1.386064514 -3.360293652  
H -0.994130149 -1.917621788 -1.896421265

26

Rh 0.887941042 1.248168281 -0.584106147  
P -0.617498700 2.558562998 0.676876495  
P -0.826063814 0.222087892 -1.899105131  
C 2.583067752 0.514214413 -2.090743698  
C 2.276978372 -0.388417473 -1.311222065  
C 2.568706502 2.456477511 0.213266644  
C 2.486360723 1.524580116 1.021088818  
C 2.672973802 0.569323230 2.123031914  
H 3.034172718 -0.393122913 1.724071682  
H 3.462395396 0.962908246 2.785700046  
H 2.896532294 3.370883458 -0.240634400  
C -0.294208303 -0.387493417 -3.559560068  
C -1.465804964 -1.313113898 -1.094309483  
C -2.376464425 1.118769915 -2.361442892  
C 0.097771606 3.426815731 2.135551722  
C -1.427332672 3.944524536 -0.238583029  
C -2.015726540 1.647221643 1.467299715  
C 3.101227306 1.433765890 -3.103037619  
H 2.248139068 -1.342149856 -0.824437744  
O 1.454627278 0.402524162 2.827458477  
C 1.624626215 -0.373678612 4.026246594  
C 0.279747268 -0.617352859 4.637880047  
H 2.109540068 -1.329959458 3.768295133  
H 2.283775599 0.158327937 4.728172888  
H -0.424692441 -1.179115231 4.025309959  
H -0.017916862 0.458230283 -4.195405861  
H 0.570716611 -1.044711437 -3.463964015  
H -1.112577766 -0.932909273 -4.039456340  
H -1.909910979 -1.076528391 -0.124821585  
H -2.218999958 -1.796075903 -1.724906202  
H -0.641510599 -2.011562858 -0.929563904  
H -2.936131424 1.435835866 -1.479497427  
H -2.128765637 2.003471106 -2.954588492  
H -3.019103563 0.467440593 -2.962020644  
H -2.629589620 1.127694515 0.728915772  
H -1.599146463 0.910988352 2.159872965  
H -2.653264136 2.339017572 2.027082488  
H -2.005392381 3.574933139 -1.086641415  
H -2.091651624 4.505777250 0.426231985  
H -0.656865384 4.620821177 -0.619064427  
H 0.531004037 2.686956919 2.812225713  
H 0.879785566 4.123058975 1.826334597  
H -0.691490400 3.981289301 2.652492471  
H 2.298277187 1.830762943 -3.731526913  
H 3.618061172 2.278946737 -2.637515938  
H 3.816737128 0.909950764 -3.747209107  
C -0.063355787 -0.218876742 5.862884182  
H 0.623734538 0.334841537 6.498402934  
H -1.038568560 -0.444550243 6.283656466

26A

Rh 0.738474246 1.134145459 -0.606878672  
P -0.666078920 2.593605669 0.580975074  
P -0.989881435 0.343029921 -2.038996891  
C 2.297467521 -0.049632857 -1.844776233  
C 1.987828626 -0.844321042 -0.959426690  
C 2.458301415 2.452211093 -0.134667263  
C 2.493018752 1.645628226 0.801421717  
C 2.950058739 0.926308074 2.003123526  
H 3.664154487 0.140385348 1.704178762  
H 3.502702307 1.638044207 2.638129699  
H 2.677415682 3.257630539 -0.807139803  
C -0.376522577 -0.416887815 -3.605816661  
C -2.056905596 -0.997489842 -1.344670385  
C -2.218101774 1.550500952 -2.710424613  
C 0.041768458 3.188262172 2.173680974  
C -1.130441950 4.167676941 -0.265155020  
C -2.284182760 1.904354582 1.149216745  
H 2.744615795 0.425307566 -2.692368722  
C 1.772607918 -1.932899909 -0.000855933  
O 1.854172493 0.368987149 2.708194328  
C 2.254026486 -0.171212088 3.980362531  
C 1.055152355 -0.765852458 4.651625315  
H 3.030123672 -0.937696404 3.816328046  
H 2.695034713 0.621493625 4.602693109  
H 0.541979674 -1.551330562 4.098166583  
H 0.865394442 -2.497417170 -0.241281174  
H 2.620040198 -2.626892716 -0.035652509  
H 1.672974384 -1.542413392 1.016340420  
H 0.161984943 0.331557639 -4.193572085  
H 0.306899960 -1.238864212 -3.388068554  
H -1.217788062 -0.791959043 -4.196645724  
H -2.570695196 -0.653521649 -0.444670365  
H -2.802025987 -1.318294909 -2.079610065  
H -1.437143524 -1.856695233 -1.075935339  
H -2.818856155 1.998444781 -1.916805952  
H -1.691293072 2.348641487 -3.240944696  
H -2.891015935 1.049298924 -3.412944169  
H -2.924627844 1.630317791 0.308469629  
H -2.100490230 1.012192048 1.754317570  
H -2.814312815 2.640931548 1.761519965  
H -1.670869448 3.967297159 -1.192076326  
H -1.757213281 4.785122950 0.385648888  
H -0.223462557 4.725630541 -0.512492480  
H 0.344267362 2.327190396 2.775010254  
H 0.919509484 3.809612612 1.989060313  
H -0.706568996 3.774555428 2.715860912  
C 0.632165177 -0.410860491 5.864859760  
H 1.130942301 0.364398681 6.441700690  
H -0.219098067 -0.893545631 6.334972292

26-TS

C -0.433131020 -0.344030271 0.225679396  
C -0.069105749 0.383057919 2.189530055  
Rh 1.703719671 -0.261754054 1.070135404  
P 2.769723117 -1.241190708 3.008475733  
P 3.636862792 0.399703870 -0.159165978  
C 0.470618459 0.097503500 -0.569449169  
C 0.906010527 1.222677750 2.216625234  
C 1.356231506 2.588829907 2.552259847  
H 1.159431938 3.249931119 1.688929673  
H 0.729146370 2.953200550 3.384549441  
H -0.960730154 0.098984401 2.725790556  
C 3.859198122 -0.478447130 -1.768618887  
C 3.528337297 2.175711740 -0.638116720  
C 5.329913374 0.307988991 0.569713155  
C 1.567773151 -1.669418750 4.340893471

C 3.518661154 -2.879348707 2.594122335  
C 4.099883943 -0.371169491 3.942452047  
C -1.753018726 -0.996518143 0.416318935  
H 0.574566259 0.320718771 -1.620442030  
O 2.727954563 2.610052902 2.899260313  
C 3.125403628 3.881330592 3.444828268  
C 4.594327449 3.849585584 3.733637912  
H 2.890981379 4.674691068 2.715683490  
H 2.553913651 4.090146460 4.361208648  
H 5.245875115 3.683008594 2.876513738  
H 4.070776367 -1.536392558 -1.589282617  
H 2.946865621 -0.409404021 -2.365695261  
H 4.688439914 -0.044788397 -2.336241230  
H 3.483770100 2.776750443 0.273386623  
H 4.399751760 2.474678366 -1.229471409  
H 2.619659280 2.350221112 -1.218713846  
H 5.374326420 0.931771077 1.465215913  
H 5.580089228 -0.721255539 0.840166931  
H 6.072360790 0.667859569 -0.149597568  
H 5.017195324 -0.342031815 3.351066705  
H 3.788077161 0.656819800 4.141204132  
H 4.308202530 -0.888197966 4.884226393  
H 4.329654196 -2.753074289 1.871746558  
H 3.920247664 -3.364360026 3.489485679  
H 2.762116045 -3.532678119 2.150103568  
H 1.111670824 -0.757063355 4.732463770  
H 0.776644270 -2.306341575 3.936446175  
H 2.067439235 -2.196268537 5.159590186  
H -1.670782011 -1.911937267 1.009233703  
H -2.478325723 -0.332739291 0.895426428  
H -2.136785603 -1.265902227 -0.573869259  
C 5.116771593 4.043984207 4.944758481  
H 6.190054640 4.047884584 5.108957863  
H 4.491411622 4.223382999 5.816191852

26A-TS

C -0.382136388 -0.380417982 0.365818148  
C -0.019259970 0.429886598 2.245951587  
Rh 1.670723566 -0.245371362 1.052258713  
P 2.718745105 -1.301687648 2.980061204  
P 3.666330549 0.419414402 -0.099639512  
C 0.361446125 0.081276376 -0.576541992  
C 0.962711027 1.260328265 2.243979780  
C 1.431873103 2.626857708 2.549540434  
H 1.227035491 3.280852953 1.683069716  
H 0.824221135 3.006660959 3.389189937  
H -0.912821930 0.142159427 2.7766885293  
C 4.037593233 -0.517446799 -1.648039300  
C 3.571144721 2.174688237 -0.653407963  
C 5.296765382 0.402244706 0.764675668  
C 1.471267474 -1.869845115 4.215161581  
C 3.570801059 -2.876182295 2.522375583  
C 3.945736127 -0.414824188 4.032781210  
H -1.306011350 -0.856217643 0.652003510  
C 0.335016225 0.400338616 -2.027633699  
O 2.810206309 3.635904074 2.870966024  
C 3.230560348 3.908912665 3.396733548  
C 4.710512169 3.879053334 3.621356548  
H 2.964233776 4.700337489 2.676626564  
H 2.697971975 4.118545207 4.335939123  
H 5.324614013 3.722136121 2.735227792  
H 4.205539463 -1.572518261 -1.413728456  
H 3.194745407 -0.450081646 -2.339128663  
H 4.931023395 -0.118747594 -2.138624742  
H 3.492475504 2.807639464 0.233669874  
H 4.465341741 2.453682871 -1.219616820  
H 2.688679398 2.331360465 -1.276804842  
H 5.240309176 1.037959501 1.651074789

H 5.563781889 -0.613008489 1.069315890  
H 6.080509458 0.781855156 0.101478740  
H 4.903586010 -0.343445233 3.513827549  
H 3.590597634 0.599940485 4.226840136  
H 4.098100596 -0.946498908 4.976887429  
H 4.408988059 -2.676022387 1.849736660  
H 3.950865303 -3.387762531 3.412421434  
H 2.868891825 -3.539837478 2.009075148  
H 0.960700180 -1.006018791 4.647462339  
H 0.727708252 -2.505806432 3.727440167  
H 1.952730106 -2.435265427 5.018944482  
C 5.284874741 4.065691024 4.809862069  
H 6.364293716 4.071070326 4.926869085  
H 4.697705407 4.236340918 5.709141507  
H 0.828055503 1.353004221 -2.245400104  
H 0.856593754 -0.374280631 -2.600181914  
H -0.693136147 0.455605977 -2.398556616

27

C 0.971477542 2.331013137 -0.557011739  
C 2.321570324 1.777319862 -0.420386288  
C -0.049249253 1.464063056 -0.412435802  
Rh 0.542709189 -0.396969607 0.019844612  
C 2.346360131 0.455116401 -0.144381221  
C -1.515931098 1.696569980 -0.556002840  
H 0.805140012 3.387380208 -0.769623352  
C 3.552309978 2.635524071 -0.586022429  
H 3.238569107 -0.160534933 -0.024168492  
P 0.530770558 0.054721618 2.370782777  
P 0.596589334 -1.035797796 -2.286961093  
H -1.727802768 2.780022403 -0.539754653  
H -1.878595306 1.313994842 -1.527207393  
O -2.198324711 1.024223872 0.499076178  
C -3.627451762 1.107252080 0.373244916  
C -4.264379582 0.519074239 1.594564748  
H -3.915160411 2.165488906 0.265405640  
H -3.957533621 0.576862573 -0.533419426  
C -5.075184958 -0.539818795 1.575510925  
H -4.053549336 1.030460920 2.533007037  
H -5.316493685 -1.059635709 0.650808071  
H -5.543937783 -0.915825301 2.479512667  
C 2.062880935 -0.495231206 3.234399355  
C 0.295530324 1.791381458 2.912174726  
C -0.814815843 -0.878458350 3.216799243  
C 1.805071725 -2.396784306 -2.584418652  
C -0.997687277 -1.723019570 -2.911277520  
C 1.051093219 0.245590735 -3.522135397  
H -1.778360003 -0.596097446 2.786468024  
H -0.668737102 -1.953585011 3.077463399  
H -0.816713903 -0.662660925 4.290064946  
H -0.678313002 2.137638173 2.560884664  
H 0.341948662 1.857879940 4.003112791  
H 1.072155452 2.421872946 2.474573106  
H 2.243229134 -1.556867753 3.041782232  
H 2.916014208 0.076424152 2.862090795  
H 1.972663874 -0.345544114 4.314867098  
H -1.779583605 -0.961049311 -2.855720006  
H -0.897943569 -2.050714611 -3.950665970  
H -1.303337235 -2.576795626 -2.300208639  
H 0.313599607 1.051192746 -3.509775580  
H 2.023450819 0.668181404 -3.258546313  
H 1.099684833 -0.186937216 -4.525859074  
H 2.811768079 -2.054910940 -2.330302008  
H 1.562090500 -3.260691444 -1.959056345  
H 1.789670334 -2.708409574 -3.633380828  
H 4.467754395 2.051555348 -0.458428275  
H 3.580948773 3.099062669 -1.579532594  
H 3.567063389 3.451223413 0.146815335

28

```

=====
C 1.183674567 2.325964592 -0.613179516
C 2.489333263 1.688356501 -0.504040186
C 0.117988815 1.525136496 -0.423045702
Rh 0.634785120 -0.358860950 0.022368788
C 2.500948030 0.366989097 -0.221710053
C -1.345140316 1.814832506 -0.520701547
H 1.081160230 3.388142730 -0.834890017
H 3.411917263 2.247992535 -0.655549294
C 3.682810925 -0.537356376 -0.073172140
P 0.629270695 0.131818021 2.375153481
P 0.489636840 -1.008131436 -2.278377593
H -1.543056198 2.881037437 -0.315810315
H -1.723008860 1.608748772 -1.538442711
O -2.033750527 0.980862147 0.411871218
C -3.463201040 1.074686684 0.280845266
C -4.116096180 0.282376702 1.370543097
H -3.755907004 2.134960436 0.350208378
H -3.774319116 0.706875859 -0.708794132
C -4.938308258 -0.745084810 1.152735060
H -3.913565723 0.614375766 2.388328068
H -5.173559742 -1.086973660 0.147200676
H -5.422729813 -1.271526584 1.969570469
C 2.171572433 -0.268933672 3.301156989
C 0.247992465 1.855634907 2.876546060
C -0.661434299 -0.884494046 3.214549266
C 1.396301361 -2.566373350 -2.671897217
C -1.243439740 -1.401700020 -2.776565947
C 1.072137796 0.177370930 -3.555741907
H -1.634330862 -0.676999661 2.762306536
H -0.438441149 -1.948445844 3.091520224
H -0.702379979 -0.656523303 4.284477328
H -0.738903122 2.123196998 2.493388104
H 0.256962481 1.945759431 3.967160701
H 0.988517535 2.534869055 2.448249974
H 2.432504093 -1.322635508 3.167660357
H 2.995021506 0.346254847 2.930520636
H 2.036363926 -0.075980274 4.370103012
H -1.880122413 -0.522884386 -2.649362867
H -1.282786411 -1.720639635 -3.822904629
H -1.636583866 -2.205309692 -2.147203249
H 0.492086541 1.100594420 -3.494469374
H 2.120214729 0.424021984 -3.370953338
H 0.967320859 -0.254786301 -4.555443248
H 2.470985035 -2.420959489 -2.535999687
H 1.067617186 -3.372959797 -2.010056649
H 1.210679199 -2.865298041 -3.708536218
H 3.665097632 -1.368849757 -0.789142664
H 4.611001557 0.024075888 -0.242750204
H 3.743729606 -0.983201324 0.927053540
=====

```

8A-TS1'

```

=====
C 0.049888282 0.062092706 -0.275007081
C -0.399948249 0.396798025 1.968571040
C 2.652193027 -0.148646561 0.550698292
C 0.601741987 -0.030430103 2.615179911
Rh 0.973559304 -1.343806196 0.971236424
P 1.750665899 -3.117474417 2.586998533
P 1.175388329 -2.690757476 -0.990152352
C 0.849938006 1.079854371 -0.611603691
C 2.181460245 1.214498643 0.073040465
C 2.992855782 1.905826979 -1.048805164
C 0.791240272 2.098396576 -1.728954991
O 2.052984480 2.772999237 -1.679415853

```

```

H 3.191565986 -0.100374229 1.493726307
H 3.220462493 -0.687167506 -0.208564952
H -0.899573390 -0.137227184 -0.768441974
H 0.638626053 1.604627150 -2.699371409
H 0.000456213 2.848226356 -1.595746464
H 3.825902048 2.515194688 -0.690094950
H 3.377863628 1.151327883 -1.755566577
H 2.086283720 1.904830971 0.922743717
C 1.167306449 0.161677116 3.958397296
O 0.519037520 0.520130390 4.917106144
O 2.485321336 -0.117658657 3.987116619
C 3.116229825 0.022509897 5.278000887
H 3.115210050 1.070416636 5.587755978
H 2.582507430 -0.573809514 6.021157319
H 4.132831706 -0.344880538 5.142376530
C 0.882122044 -1.810842081 -2.580526495
C 1.956884784 -1.145482535 -3.193618454
C -0.395582731 -1.702976512 -3.146541729
C 1.757603590 -0.395022583 -4.351353805
C -0.591718405 -0.946670451 -4.304693038
C 0.480736762 -0.289833130 -4.910144480
H 2.956981341 -1.227119574 -2.777919047
H -1.239800621 -2.215812061 -2.696702231
H 2.599707284 0.110083992 -4.815329763
H -1.586042114 -0.879329738 -4.737014829
H 0.325494952 0.294383750 -5.812088950
C 2.761787638 -3.538354123 -1.331291311
C 2.946827763 -4.284047164 -2.509145525
C 3.839390464 -3.391688824 -0.449037886
C 4.166710057 -4.908919011 -2.762303816
C 5.065125458 -4.006822295 -0.709436244
C 5.228620674 -4.776042647 -1.861770768
H 2.142879028 -4.363555433 -3.235010134
H 3.723247095 -2.806716610 0.453265845
H 4.292683514 -5.491922025 -3.669959407
H 5.884206895 -3.883270291 -0.006476169
H 6.179138214 -5.259487381 -2.066604133
C -0.170904302 -3.930418869 -0.896757031
C -1.394280512 -3.485491214 -0.360407488
C -0.061910766 -5.255804334 -1.332809931
C -2.491343813 -4.342001777 -0.286939578
C -1.162560168 -6.109801771 -1.256593916
C -2.377643618 -5.656580152 -0.742141223
H -1.497175748 -2.459079479 -0.012400269
H 0.880727899 -5.635100813 -1.709532232
H -3.431136067 -3.982572242 0.122772008
H -1.064824147 -7.137825803 -1.592676552
H -3.230250486 -6.327147216 -0.687510318
C 1.372865545 -4.867039865 2.093276308
C 0.122757872 -5.450803273 2.347724687
C 2.355575441 -5.638312890 1.450431539
C -0.131405013 -6.771358837 1.980055459
C 2.097407460 -6.957778356 1.083635448
C 0.854025164 -7.530992573 1.350647780
H -0.655309415 -4.894352695 2.855424094
H 3.337213441 -5.225626551 1.255604647
H -1.103618605 -7.205737035 2.193364503
H 2.876612703 -7.538450305 0.598092255
H 0.655430903 -8.562320997 1.073451873
C 3.471121830 -3.274135729 3.212535933
C 3.863821374 -4.402167102 3.955392609

```

C 4.415148621 -2.270595820 2.959703401  
C 5.167391934 -4.514222532 4.434934490  
C 5.723239333 -2.388105587 3.432802809  
C 6.101218411 -3.508847202 4.172804099  
H 3.151275407 -5.196625007 4.153357309  
H 4.129235280 -1.391735486 2.400311341  
H 5.454904882 -5.389571204 5.010022033  
H 6.443891508 -1.603046804 3.221900970  
H 7.118449094 -3.601217210 4.542137337  
C 0.707476450 -2.914770521 4.095137129  
C -0.665812644 -2.668765923 3.917237661  
C 1.215565533 -2.989123756 5.398379041  
C -1.512337196 -2.533024665 5.015413587  
C 0.368698663 -2.827942454 6.496640578  
C -0.994655924 -2.605521649 6.309801494  
H -1.081613472 -2.581325677 2.916036572  
H 2.272431506 -3.165614869 5.564420518  
H -2.573714747 -2.360668485 4.860248487  
H 0.778800164 -2.879392326 7.501125717  
H -1.650230532 -2.484063470 7.166802347  
C -1.755915267 0.857054825 1.918369706  
C -2.286925563 1.694324047 0.920618638  
C -2.556848864 0.485424913 3.021454735  
C -3.602432822 2.134972366 1.017483437  
C -3.869397809 0.936455424 3.107375413  
C -4.396678127 1.753112149 2.103351504  
H -1.660769263 2.002715821 0.092846038  
H -2.120605838 -0.122378529 3.806615854  
H -4.009453558 2.785666916 0.249383736  
H -4.480276813 0.656157264 3.960604870  
H -5.423112917 2.101537240 2.171775139

=====

8B-TS1'

=====

C -0.067223298 -0.110650562 0.000371616  
C 0.077328759 -0.147507909 2.255334516  
C 2.695681439 0.037316876 0.019178245  
C 1.274530223 0.056037526 2.678260523  
Rh 1.400842134 -1.283029078 1.008805521  
P 3.218615808 -2.564832278 2.007819855  
P 0.742479471 -2.804720496 -0.829816787  
C 0.485490345 0.997748532 -0.492859658  
C 1.935121746 1.319712038 -0.226957704  
C 2.278589558 2.104712752 -1.519635220  
C -0.020206221 1.977382443 -1.533747599  
O 1.091002176 2.831872707 -1.810742628  
H 3.581755968 0.140056256 0.645187729  
H 2.934440943 -0.480362785 -0.909300373  
H -1.081554025 -0.437571217 -0.186984836  
H -0.350280796 1.443082172 -2.437707466  
H -0.848853699 2.596621909 -1.173785909  
H 3.095539375 2.820355423 -1.401299721  
H 2.526844695 1.400386622 -2.331166782  
H 2.016164297 1.992433042 0.638442710  
C -1.309856956 0.015680856 2.700301343  
O -1.546756583 0.331866159 3.852257533  
O -2.253604543 -0.263905434 1.790525411  
C -3.615339736 -0.155495177 2.259211172  
H -3.772269298 -0.799401494 3.128556112  
H -3.839479847 0.877504580 2.536477232  
H -4.233092693 -0.477265196 1.421298280

C 0.652252622 -1.923189572 -2.436292056  
C 1.847681233 -1.574274165 -3.088660309  
C -0.564772026 -1.500373933 -2.989550933  
C 1.825650347 -0.833363965 -4.269439834  
C -0.583784769 -0.757425015 -4.171406226  
C 0.608178707 -0.421528877 -4.813966009  
H 2.805970810 -1.891040263 -2.688324920  
H -1.501283113 -1.745410870 -2.500638757  
H 2.759099211 -0.578778131 -4.763006819  
H -1.535175148 -0.439679489 -4.588152915  
H 0.589677720 0.160116205 -5.730500952  
C 1.527339129 -4.424001415 -1.219988617  
C 1.570708900 -5.357648318 -0.173760858  
C 2.029495263 -4.781186799 -2.477203348  
C 2.142748549 -6.610668483 -0.368473540  
C 2.598971749 -6.041523024 -2.669552388  
C 2.666763001 -6.953628360 -1.617226424  
H 1.149337837 -5.108282357 0.794109748  
H 1.978027300 -4.090129889 -3.310719310  
H 2.173112088 -7.319685614 0.453980512  
H 2.985856531 -6.309179311 -3.648739895  
H 3.113798810 -7.931222273 -1.771793847  
C -0.959098939 -3.384203900 -0.448677128  
C -1.674336852 -4.148428312 -1.387053777  
C -1.517634298 -3.161334091 0.815088864  
C -2.934514207 -4.648697630 -1.071464656  
C -2.775813397 -3.674185165 1.134424865  
C -3.486512285 -4.415171004 0.191954951  
H -1.240743529 -4.355378812 -2.361348856  
H -0.975540263 -2.586243681 1.556712690  
H -3.482130731 -5.231771678 -1.806071251  
H -3.194355163 -3.496226612 2.120862444  
H -4.465996525 -4.814834834 0.438251233  
C 4.426144519 -3.411998822 0.925996113  
C 5.439351344 -4.215849657 1.479815701  
C 4.392449764 -3.221940869 -0.457841337  
C 6.360335637 -4.852342654 0.652566983  
C 5.319872062 -3.853143003 -1.286779198  
C 6.298458192 -4.676530395 -0.733179304  
H 5.514320682 -4.330242925 2.557183760  
H 3.636562993 -2.577589150 -0.885061299  
H 7.133322108 -5.478358295 1.088635425  
H 5.271858637 -3.705331375 -2.361503110  
H 7.019655652 -5.172886486 -1.376006341  
C 2.327753976 -3.855752167 2.969759985  
C 1.233070781 -3.448281975 3.754592079  
C 2.657467517 -5.218956363 2.924081161  
C 0.494226024 -4.381277556 4.481449390  
C 1.910816804 -6.148473942 3.647418603  
C 0.830412964 -5.734282673 4.428242977  
H 0.957633172 -2.399764131 3.805885478  
H 3.475067935 -5.564829827 2.302878646  
H -0.343043702 -4.048020271 5.087736124  
H 2.176203149 -7.200813887 3.599864321  
H 0.252820823 -6.462473921 4.989436178  
C 4.358278855 -1.783101990 3.222461641  
C 4.128870744 -1.823993070 4.604653042  
C 5.507403224 -1.132676261 2.741217670  
C 5.032371638 -1.229439287 5.485937187  
C 6.408544357 -0.543418657 3.626357433  
C 6.174875441 -0.590204958 5.002795833

H 3.252759483 -2.324010109 5.002966932  
H 5.715408000 -1.108845695 1.674943104  
H 4.839965414 -1.269915578 6.554026907  
H 7.297997763 -0.053959415 3.239705775  
H 6.879087765 -0.134945509 5.692603886  
C 2.030820129 0.699169493 3.720954661  
C 1.450157408 0.806398934 5.002406073  
C 3.287971257 1.275330687 3.475874100  
C 2.135675976 1.467177051 6.016793138  
C 3.952926419 1.953760046 4.490807499  
C 3.383782815 2.042888763 5.763705678  
H 0.461862436 0.393274684 5.170698765  
H 3.733451971 1.191776013 2.492782034  
H 1.689654758 1.546175248 7.003881071  
H 4.922983753 2.399267182 4.294731586  
H 3.911141934 2.564407613 6.557360179

=====  
8A-TS1"  
=====

C 0.000694065 0.039765556 -0.244787668  
C -0.478794515 0.260260741 1.923084332  
C 2.601417926 -0.117708518 0.642687964  
C 0.525935706 -0.008424597 2.646542951  
Rh 0.938730627 -1.343756547 1.040774138  
P 1.805332651 -3.072952164 2.657428664  
P 1.194505947 -2.715009715 -0.916567500  
C 0.803853149 1.052193932 -0.585448904  
C 2.118086340 1.223328396 0.125424415  
C 2.945810355 1.900216012 -0.993936885  
C 0.760895536 2.037785650 -1.733247998  
O 2.008495348 2.736607366 -1.666382762  
H 3.117961509 -0.043164528 1.595921800  
H 3.189428871 -0.667961977 -0.091900219  
H -0.929804941 -0.179507308 -0.764740100  
H 0.647628628 1.511420654 -2.692002173  
H -0.047942679 2.773477702 -1.644238492  
H 3.760847654 2.529993560 -0.629260456  
H 3.359130481 1.134673344 -1.672103547  
H 1.991916054 1.931639123 0.956027697  
C -1.862540613 0.797346290 1.808302017  
H -2.380588430 0.308604971 0.975520317  
C 1.087598483 0.272585447 3.970397170  
O 0.477868463 0.827162499 4.860141989  
O 2.366964367 -0.141690229 4.064747251  
C 2.987382226 0.046839477 5.354699282  
H 3.038630558 1.110083976 5.600236355  
H 2.414330944 -0.477886431 6.122257963  
H 3.984596864 -0.381569242 5.256899838  
C 0.952786942 -1.843208348 -2.518573582  
C 2.052835376 -1.193425451 -3.102478628  
C -0.300912163 -1.751636008 -3.136886853  
C 1.902956989 -0.477081775 -4.287918287  
C -0.447544473 -1.030691716 -4.324011835  
C 0.651195536 -0.394772404 -4.902778734  
H 3.035232429 -1.265819562 -2.645350533  
H -1.161977244 -2.254475081 -2.708210531  
H 2.763199039 0.015405546 -4.731687364  
H -1.421875868 -0.976232321 -4.801029262  
H 0.534613676 0.160220896 -5.828843457  
C 2.792875392 -3.549213961 -1.230876446  
C 2.994096755 -4.316891947 -2.391747797

C 3.868680087 -3.348390373 -0.358282605  
C 4.228054593 -4.917145579 -2.631918014  
C 5.108809929 -3.938585956 -0.605167220  
C 5.286515742 -4.733779856 -1.736896158  
H 2.194137752 -4.428657223 -3.117310514  
H 3.741438974 -2.742452215 0.527581392  
H 4.368762572 -5.518293953 -3.525465870  
H 5.926221587 -3.776437811 0.091767298  
H 6.248459642 -5.198816479 -1.931979546  
C -0.154962953 -3.954636022 -0.870625189  
C -1.389145751 -3.512418776 -0.359084121  
C -0.047356627 -5.269214529 -1.339141394  
C -2.497442693 -4.356923313 -0.343867884  
C -1.158730816 -6.112231751 -1.321194855  
C -2.384634172 -5.659282093 -0.833225492  
H -1.488992143 -2.495811669 0.016983291  
H 0.901763298 -5.649701405 -1.696657548  
H -3.445474412 -3.998852196 0.047503251  
H -1.061532843 -7.131264286 -1.684069605  
H -3.246082127 -6.320563203 -0.825538621  
C 1.369774115 -4.804355163 2.148581331  
C 0.102611149 -5.338437471 2.429826978  
C 2.297643576 -5.605536972 1.461811731  
C -0.220257202 -6.639919577 2.048960611  
C 1.972640357 -6.908211463 1.087272734  
C 0.714299686 -7.431879312 1.382534981  
H -0.634511287 -4.756642847 2.970388066  
H 3.287851141 -5.231056190 1.236601366  
H -1.204676817 -7.035024935 2.281625395  
H 2.711546416 -7.513905183 0.570159098  
H 0.463252777 -8.449013954 1.095703598  
C 3.564928268 -3.238740121 3.169574591  
C 4.035203032 -4.416886562 3.776952324  
C 4.459967830 -2.176853952 2.979542400  
C 5.368310840 -4.528243550 4.168866587  
C 5.795930983 -2.292005607 3.366411420  
C 6.253764277 -3.468961683 3.959865862  
H 3.362160522 -5.252083873 3.939471619  
H 4.113866586 -1.255509548 2.534669467  
H 5.715117583 -5.445489067 4.635723491  
H 6.476385246 -1.461125976 3.203136013  
H 7.293641770 -3.561071247 4.259504766  
C 0.879851417 -2.901174449 4.243272689  
C -0.486480923 -2.576237824 4.193632063  
C 1.478174977 -3.101927241 5.495440524  
C -1.236459428 -2.463165670 5.362505589  
C 0.725977102 -2.982885086 6.664978312  
C -0.630724441 -2.664148330 6.603000000  
H -0.970221792 -2.397993199 3.237778484  
H 2.532222223 -3.345516778 5.566959353  
H -2.289858088 -2.205764883 5.304058364  
H 1.205429259 -3.140333265 7.626984117  
H -1.211091981 -2.567875871 7.515540756  
C -2.597236515 0.471946865 3.127442097  
H -3.592575894 0.926504814 3.116174587  
H -2.712912787 -0.608195880 3.258992379  
H -2.036983723 0.860034276 3.982678667  
C -1.814996581 2.314248301 1.539291989  
H -1.314743752 2.830316409 2.364467975  
H -1.275866839 2.532921047 0.614513742  
H -2.832928356 2.705968243 1.453504488

=====

8B-TS1"

=====

C -0.146876346 -0.096087845 0.013215739  
C 0.130056310 -0.077484589 2.338155783  
C 2.614476307 0.119034363 0.088284022  
C 1.332141258 0.015445055 2.744186030  
Rh 1.329195312 -1.272820481 0.999891789  
P 3.178591723 -2.621475130 1.884345044  
P 0.705881227 -2.707503052 -0.916473573  
C 0.383655884 1.013437644 -0.495706567  
C 1.821479332 1.369432190 -0.216564367  
C 2.165767007 2.142182499 -1.514060617  
C -0.135244344 1.991651410 -1.532479218  
O 0.970163084 2.855783061 -1.811790539  
H 3.441400229 0.272979229 0.781131102  
H 2.946687588 -0.394730444 -0.813345162  
H -1.165736682 -0.429637277 -0.147816241  
H -0.459671666 1.455144843 -2.437313512  
H -0.968229556 2.606056789 -1.173454252  
H 2.974575705 2.868000235 -1.400276516  
H 2.422578607 1.433532780 -2.318801630  
H 1.861634148 2.068820537 0.629196413  
C 2.172885609 0.607056392 3.821590420  
H 3.217723335 0.324597977 3.694957174  
C -1.236250136 0.317907336 2.694758800  
O -1.441982485 1.146973947 3.558462175  
O -2.194789841 -0.364138312 2.048612555  
C -3.552004912 -0.028556399 2.411633469  
H -3.716041349 -0.204029146 3.477700877  
H -3.757057412 1.020879235 2.186316336  
H -4.178344912 -0.684724796 1.807928370  
C 0.645402657 -1.795328257 -2.507968975  
C 1.845428885 -1.402784307 -3.125564280  
C -0.569079937 -1.406003885 -3.090900018  
C 1.830699841 -0.655838954 -4.302924822  
C -0.580850032 -0.658056407 -4.269891161  
C 0.615948070 -0.281666735 -4.879474116  
H 2.803081461 -1.687693410 -2.701943802  
H -1.509920560 -1.685059325 -2.629612935  
H 2.768280331 -0.367457647 -4.769181312  
H -1.530674888 -0.369475418 -4.710646239  
H 0.603365500 0.302467226 -5.794576755  
C 1.526803115 -4.305897141 -1.313830935  
C 1.542612668 -5.270728456 -0.295335422  
C 2.087383712 -4.618737723 -2.558912870  
C 2.143791088 -6.508385330 -0.503595672  
C 2.686774825 -5.862600906 -2.764696777  
C 2.725978877 -6.805231364 -1.737930564  
H 1.074465952 -5.059920626 0.660082640  
H 2.060107140 -3.903800903 -3.373177259  
H 2.152282171 -7.239795660 0.299085369  
H 3.120697610 -6.093279885 -3.733565436  
H 3.197084575 -7.769975460 -1.901727739  
C -0.997206587 -3.323225893 -0.606889663  
C -1.639761662 -4.118664097 -1.571785271  
C -1.623320156 -3.105442952 0.625853490  
C -2.896048160 -4.658693044 -1.312723057  
C -2.879816058 -3.655537108 0.886437750  
C -3.518194568 -4.429181011 -0.081569531  
H -1.152578338 -4.318849043 -2.521832015

H -1.148447682 -2.491841943 1.382700663  
H -3.386808037 -5.266624762 -2.067089017  
H -3.353968490 -3.478147430 1.847526764  
H -4.495566397 -4.857837548 0.120041006  
C 4.444047405 -3.320056260 0.758981484  
C 5.533229009 -4.045665090 1.275293031  
C 4.400013661 -3.052470475 -0.610967332  
C 6.524144104 -4.526035794 0.423883531  
C 5.396687043 -3.525384792 -1.464407410  
C 6.456585007 -4.268934412 -0.948840967  
H 5.617372429 -4.214441611 2.344730783  
H 3.581991235 -2.469840710 -1.008877080  
H 7.358050640 -5.089297480 0.832370107  
H 5.342382263 -3.312776057 -2.528264776  
H 7.235818592 -4.637641870 -1.609570382  
C 2.364561433 -4.010475197 2.772374041  
C 1.198448175 -3.717780401 3.503022266  
C 2.825710625 -5.334818924 2.734367958  
C 0.512848082 -4.727297033 4.180653732  
C 2.134925797 -6.340939444 3.410559968  
C 0.976820732 -6.043340308 4.133192833  
H 0.826109580 -2.697903245 3.550975320  
H 3.704656400 -5.592576739 2.155163835  
H -0.384868592 -4.483948267 4.741797268  
H 2.502664398 -7.362397060 3.368877689  
H 0.440846767 -6.831088581 4.654058912  
C 4.288083291 -1.874713059 3.142037102  
C 4.204139091 -2.184315869 4.504611801  
C 5.254361650 -0.951012791 2.705854013  
C 5.056163836 -1.561606632 5.419878059  
C 6.098517475 -0.329318709 3.622336102  
C 5.997042851 -0.629511090 4.984157310  
H 3.479615445 -2.910204327 4.858339558  
H 5.360070052 -0.730647449 1.647129302  
H 4.982648164 -1.809961057 6.474728097  
H 6.839772280 0.384487170 3.274949013  
H 6.655903719 -0.145196733 5.698760880  
C 2.050820722 2.144335668 3.748054001  
H 2.452659219 2.535534191 2.808424665  
H 1.002964016 2.445304126 3.834643387  
H 2.615219990 2.594216217 4.571313724  
C 1.666499444 0.081635891 5.182567170  
H 0.624487048 0.378759373 5.336324259  
H 1.734642037 -1.008268809 5.239953185  
H 2.275847813 0.501320738 5.989024307

=====

15A-TS1'

=====

C 0.853089406 0.548777413 -0.878371709  
C 0.417681128 -0.449417720 1.768628061  
C 2.511678575 0.235205491 4.532945385  
C 1.222634871 0.240002598 5.067657919  
H 0.418168855 0.733911030 4.535087500  
C 0.957439407 -0.383585562 6.295533661  
C -0.445274566 -0.411464040 6.857452065  
C 2.013813875 -0.999022113 6.971866438  
H 1.819409197 -1.482530087 7.927508036  
C 3.321398109 -1.006519795 6.462485369  
C 4.437353370 -1.675024226 7.231031748  
C 3.557745858 -0.380639100 5.238826952  
H 4.566032321 -0.368812686 4.832173691  
C 3.831093984 2.549434084 3.702248718  
C 5.201713441 2.545947634 3.973572713

H 5.820567399 1.709769475 3.666917562  
C 5.795845979 3.630659035 4.627779040  
C 7.285152177 3.631948799 4.878653940  
C 4.979153848 4.686249900 5.057223816  
H 5.432373670 5.522128698 5.584837230  
C 3.594111662 4.684210507 4.844756984  
C 2.706544485 5.780325738 5.384491870  
C 3.034761999 3.618334791 4.133422408  
H 1.967613193 3.622305371 3.920502910  
C 3.918231834 -0.037111040 2.001182773  
C 3.528178023 -1.411154250 2.121046347  
H 2.918599444 -1.708548964 2.965612125  
C 3.895494821 -2.343895146 1.191301160  
H 3.578959248 -3.376793765 1.299035592  
C 4.684635050 -1.976484308 0.071806671  
C 5.059604935 -2.928356205 -0.910223145  
H 4.709630068 -3.951512402 -0.800920005  
C 5.855339342 -2.568058006 -1.973835843  
H 6.143335801 -3.305705006 -2.717064036  
C 6.301783421 -1.231612221 -2.097252885  
H 6.929548670 -0.948672382 -2.937247826  
C 5.946869025 -0.283631750 -1.163125810  
H 6.284816383 0.738239383 -1.282390790  
C 5.130906883 -0.622663242 -0.047923074  
C 4.746731776 0.353649196 0.941911472  
C 5.397350513 1.704377997 0.856932299  
C 6.802031467 1.755347159 1.177692884  
C 7.499066630 0.640814582 1.722667443  
H 6.967187056 -0.287695208 1.896747866  
C 8.836103893 0.726096556 2.042113308  
H 9.344783824 -0.136179561 2.463419154  
C 9.554110217 1.924777158 1.824658164  
H 10.609875299 1.976080280 2.073781645  
C 8.910985342 3.023185755 1.300962165  
H 9.450092304 3.951579639 1.131859924  
C 7.531124314 2.970450073 0.974840472  
C 6.856789579 4.092892030 0.431921739  
H 7.418619129 5.001022832 0.229942471  
C 5.516606332 4.035481367 0.161491036  
H 5.022364449 4.899854741 -0.266076983  
C 4.758684800 2.854688898 0.415278613  
C 2.380344058 4.579848900 0.394828300  
C 1.196871712 5.013967367 -0.224079783  
H 0.697770933 4.373355410 -0.947298470  
C 0.654001225 6.266613807 0.079241785  
C -0.603092629 6.746784156 -0.606324846  
C 1.321344756 7.080245585 1.002477941  
H 0.914866656 8.064082310 1.230558137  
C 2.499394008 6.668552131 1.634463300  
C 3.245053477 7.600731954 2.560886406  
C 3.008903395 5.396455899 1.345574152  
H 3.902988673 5.062466855 1.858534026  
C 3.141592108 2.852107437 -1.855109157  
C 3.126919100 4.006587555 -2.647939003  
H 2.942140614 4.976613871 -2.198406547  
C 3.331074093 3.925734453 -4.028911298  
C 3.282082761 5.164237706 -4.892264825  
C 3.554412457 2.667715769 -4.606836701  
H 3.707367090 2.598179155 -5.682052042  
C 3.588036480 1.502357222 -3.834932523  
C 3.770568395 0.141049296 -4.460140109  
C 3.391221208 1.611043227 -2.452048236  
H 3.414696788 0.710219258 -1.846508373  
P 2.907283937 1.147078992 2.996557891  
P 2.964058823 2.896301831 -0.022388452  
Rh 1.660762202 1.145375916 0.947803062  
C -0.079554093 2.299691198 1.158152690  
C -1.003554081 1.567281638 2.120058242  
C -0.694008441 0.104136265 2.271149902  
H 0.703589824 -1.473577215 1.982946324

C -1.873963340 -0.480466874 3.009576546  
H -0.854148902 1.994181567 3.127725713  
C -2.521217501 1.489249695 1.903341344  
H 0.263783239 3.256054549 1.550304235  
H -0.498647978 2.440425202 0.162034534  
H -2.155822941 -1.466257169 2.611862409  
H -1.688852779 -0.598045366 4.087275004  
H -3.068876526 2.402253736 2.151649297  
H -2.746687483 1.206734872 0.862007349  
O -2.936872923 0.467884390 2.826677956  
C 0.631066427 -0.563564904 -0.293647172  
C 0.480733518 1.206137431 -2.137524001  
O 0.099652373 2.358520801 -2.219716973  
O 0.566283708 0.360701440 -3.180189104  
C 0.186341457 0.924815131 -4.456203353  
H 0.287843838 0.110606050 -5.173182135  
H -0.844155461 1.285752189 -4.422154313  
H 0.855266573 1.751080302 -4.708917292  
H 5.400959479 -1.560026357 6.726664919  
H 4.531160615 -1.250734374 8.237031090  
H 4.246134287 -2.747773846 7.350415425  
H -0.443300550 -0.312160439 7.947409377  
H -1.059888341 0.394919600 6.445620627  
H -0.943986525 -1.359845022 6.620453918  
H 7.631306398 4.601205179 5.247542445  
H 7.557360370 2.875435036 5.624382075  
H 7.836606190 3.395426380 3.962927542  
H 1.935696138 6.058499228 4.658679517  
H 2.194571878 5.446024019 6.294999273  
H 3.276979032 6.678107503 5.636877051  
H 2.841178777 -0.436149892 -4.379783155  
H 4.039491601 0.210529013 -5.517868545  
H 4.547161633 -0.431112967 -3.942720921  
H 4.101403394 5.176161705 -5.618680082  
H 2.344885147 5.206833743 -5.460354976  
H 3.346775595 6.076269903 -4.292423329  
H -1.245475738 7.306373191 0.081138129  
H -0.359823601 7.417176191 -1.439388682  
H -1.178643794 5.911686102 -1.014236516  
H 3.974228129 7.059438867 3.169290823  
H 3.790018491 8.357920010 1.983873725  
H 2.565212716 8.134699586 3.232154038  
C 0.525249537 -1.990567704 -0.518896959  
C -0.524167423 -2.773624234 -0.010728443  
C 1.493606140 -2.581011151 -1.353698557  
C -0.604999391 -4.124637461 -0.337149381  
C 1.410142281 -3.933795557 -1.668079991  
C 0.363613169 -4.707863492 -1.159149182  
H -1.279769525 -2.309727636 0.611951267  
H 2.301528373 -1.971581218 -1.741879780  
H -1.426052343 -4.723513100 0.046121217  
H 2.161217078 -4.382743531 -2.312011494  
H 0.298934765 -5.763689296 -1.406494324

=====  
15B-TS1'  
=====

C 0.592654468 -0.350342914 -0.022956496  
C 0.227933481 -0.149407375 1.928437671  
C 2.186556048 0.245391072 4.487011277  
C 1.017430932 0.669059194 5.136663271  
H 0.486477301 1.545315211 4.778294732  
C 0.528837870 -0.000587353 6.259224491  
C -0.719817414 0.477154258 6.964566244  
C 1.234950393 -1.117852661 6.726473408  
H 0.862240417 -1.654990452 7.596403689  
C 2.413087087 -1.551884103 6.111026225  
C 3.149722131 -2.764623350 6.630964472  
C 2.888864653 -0.854427303 4.989879563



|   |              |              |              |    |              |              |              |
|---|--------------|--------------|--------------|----|--------------|--------------|--------------|
| H | 3.813774238  | -1.179385902 | 4.523576422  | H  | 5.801674028  | 1.321494443  | -4.636721910 |
| C | 3.363104224  | 2.739724942  | 4.038090504  | C  | 4.553943279  | 0.679721221  | -3.010840221 |
| C | 4.388863434  | 2.573415991  | 4.975435279  | C  | 4.510883384  | -0.768753006 | -3.435154033 |
| H | 4.857675418  | 1.601162301  | 5.102228233  | C  | 3.868214915  | 1.096315139  | -1.859908834 |
| C | 4.819336307  | 3.651097030  | 5.751192533  | H  | 3.310760544  | 0.364210943  | -1.283995630 |
| C | 5.963436708  | 3.490151475  | 6.721787330  | P  | 2.738497759  | 1.309566011  | 3.101779831  |
| C | 4.190870383  | 4.891339317  | 5.576019942  | P  | 3.006425324  | 2.998617199  | 0.042212824  |
| H | 4.521484143  | 5.737321570  | 6.175308316  | Rh | 1.584143870  | 1.293582228  | 1.001835924  |
| C | 3.146767776  | 5.074620233  | 4.663639836  | C  | -0.084460700 | 2.566158763  | 1.177713079  |
| C | 2.516289685  | 6.432638333  | 4.469039829  | C  | -0.930563465 | 2.024783881  | 2.309785289  |
| C | 2.729545964  | 3.976704532  | 3.902997842  | C  | -0.784632352 | 0.539111154  | 2.468099689  |
| H | 1.907168221  | 4.082364206  | 3.201291316  | H  | 0.442012889  | -1.177476537 | 2.195213531  |
| C | 4.085869515  | 0.471641458  | 2.173177019  | C  | -1.966828094 | 0.083548793  | 3.292714486  |
| C | 3.886368043  | -0.917550362 | 1.896642341  | H  | -0.571549069 | 2.468698539  | 3.253816156  |
| H | 3.047985213  | -1.442146412 | 2.337818819  | C  | -2.463140058 | 2.149834420  | 2.325716176  |
| C | 4.718181339  | -1.591801934 | 1.040087635  | H  | 0.304333171  | 3.564238435  | 1.367444323  |
| H | 4.544668820  | -2.645593042 | 0.840586130  | H  | -0.589277886 | 2.554058338  | 0.210940970  |
| C | 5.780268525  | -0.923086063 | 0.383056918  | H  | -2.462486822 | -0.779943290 | 2.823772508  |
| C | 6.639943873  | -1.610096966 | -0.515443952 | H  | -1.697252497 | -0.191928678 | 4.319505856  |
| H | 6.499599346  | -2.679396522 | -0.652223161 | H  | -2.842633675 | 3.133018935  | 2.615819311  |
| C | 7.620339278  | -0.937411537 | -1.208475177 | H  | -2.883579197 | 1.877659477  | 1.342753673  |
| H | 8.269043206  | -1.470729069 | -1.897105851 | O  | -2.848300888 | 1.217163392  | 3.343339528  |
| C | 7.777134206  | 0.458175428  | -1.026162758 | C  | 0.652759062  | 0.637577440  | -0.846585019 |
| H | 8.539003494  | 0.990387052  | -1.588271514 | C  | 0.745331512  | -1.818261466 | -0.134716422 |
| C | 6.974969774  | 1.148869575  | -0.147309333 | O  | 1.401821972  | -2.520096292 | 0.610679695  |
| H | 7.105295162  | 2.217840941  | -0.029059888 | O  | 0.091072902  | -2.258220903 | -1.219595708 |
| C | 5.957432928  | 0.484212130  | 0.594205888  | C  | 0.211824300  | -3.674098684 | -1.481438143 |
| C | 5.091219324  | 1.179365408  | 1.503314313  | H  | -0.389742243 | -3.854551281 | -2.371520010 |
| C | 5.291375142  | 2.656925067  | 1.667958929  | H  | 1.256991180  | -3.940486707 | -1.658717678 |
| C | 6.420233173  | 3.113527234  | 2.425188854  | H  | -0.165472963 | -4.250998392 | -0.633265102 |
| C | 7.281321215  | 2.217234487  | 3.116360188  | H  | 4.178183948  | -2.801639680 | 6.260147229  |
| H | 7.087885176  | 1.151393981  | 3.064448700  | H  | 3.182722804  | -2.773105772 | 7.725155281  |
| C | 8.352673784  | 2.684028297  | 3.845113388  | H  | 2.651134352  | -3.688973394 | 6.314440611  |
| H | 8.998446218  | 1.980522124  | 4.362894028  | H  | -0.467938555 | 0.982198016  | 7.904928923  |
| C | 8.621248283  | 4.072504315  | 3.927738914  | H  | -1.288968784 | 1.180555920  | 6.349436552  |
| H | 9.472211604  | 4.425977401  | 4.502344960  | H  | -1.378636455 | -0.360692666 | 7.216972744  |
| C | 7.805096633  | 4.967086179  | 3.273077380  | H  | 5.891117065  | 4.199619318  | 7.550999637  |
| H | 8.000964877  | 6.034880958  | 3.326058955  | H  | 5.996189016  | 2.478869434  | 7.138335603  |
| C | 6.695617740  | 4.516332085  | 2.510191658  | H  | 6.916000838  | 3.667072529  | 6.210807327  |
| C | 5.859090410  | 5.417654794  | 1.808792104  | H  | 1.472458291  | 6.349688934  | 4.151422623  |
| H | 6.085791637  | 6.480515519  | 1.838992424  | H  | 2.545644196  | 7.029337245  | 5.385892549  |
| C | 4.778837282  | 4.965987722  | 1.093272703  | H  | 3.053846888  | 6.996737702  | 3.694454621  |
| H | 4.167253462  | 5.681265464  | 0.558428344  | H  | 3.538642669  | -1.218597669 | -3.206991010 |
| C | 4.460265212  | 3.581105575  | 1.037238075  | H  | 4.693069019  | -0.879129845 | -4.508231345 |
| C | 2.085205045  | 4.507444190  | -0.438847196 | H  | 5.274539238  | -1.346373411 | -2.902718769 |
| C | 1.607869102  | 4.661776660  | -1.744034837 | H  | 7.135000952  | 3.623654620  | -4.345805471 |
| H | 1.890196218  | 3.956365791  | -2.516145188 | H  | 5.650148567  | 4.135360971  | -5.146568001 |
| C | 0.753786166  | 5.723374650  | -2.078752653 | H  | 6.176076544  | 4.948566921  | -3.665949645 |
| C | 0.221989874  | 5.841558590  | -3.487653446 | H  | -0.341296008 | 6.767857184  | -3.631226120 |
| C | 0.407578230  | 6.642658601  | -1.086568423 | H  | 1.036354408  | 5.822752432  | -4.221050240 |
| H | -0.242937250 | 7.477413991  | -1.339229627 | H  | -0.439116362 | 4.998837529  | -3.721140558 |
| C | 0.879739605  | 6.522280151  | 0.227833757  | H  | 1.249069191  | 7.628196939  | 2.053911241  |
| C | 0.478000299  | 7.523797302  | 1.285687204  | H  | 0.294413950  | 8.511530277  | 0.852355700  |
| C | 1.706138784  | 5.441913287  | 0.542728089  | H  | -0.446472649 | 7.213014557  | 1.788050880  |
| H | 2.075517472  | 5.344985844  | 1.558299029  | C  | 0.100239606  | 1.164533014  | -2.070426540 |
| C | 3.879076597  | 2.436980958  | -1.470155999 | C  | 0.853344039  | 1.627144549  | -3.163044425 |
| C | 4.627401038  | 3.369580845  | -2.206755240 | C  | -1.309220208 | 1.200722233  | -2.151238549 |
| H | 4.653418629  | 4.410335311  | -1.895051625 | C  | 0.212170838  | 2.109264713  | -4.301034196 |
| C | 5.327461383  | 2.979230116  | -3.348560905 | C  | -1.939884610 | 1.703218522  | -3.285189320 |
| C | 6.113911626  | 3.977738059  | -4.165444231 | C  | -1.182561696 | 2.158624455  | -4.366686227 |
| C | 5.270009503  | 1.631967679  | -3.739016595 | H  | 1.932836700  | 1.585324182  | -3.129198819 |

H -1.894170503 0.827031995 -1.317043500  
H 0.808669032 2.447292979 -5.143788971  
H -3.025183648 1.727970084 -3.327701388  
H -1.675543600 2.540446014 -5.255936904

=====  
15A-TS1'  
=====

C 0.755146255 0.668091600 -0.851003932  
C 0.306568932 -0.468775447 1.678987895  
C 2.492243888 -0.006408454 4.469056466  
C 1.200108522 0.019598318 4.998083483  
H 0.414281268 0.556735296 4.479474560  
C 0.907982989 -0.630677424 6.204948721  
C -0.497119825 -0.623707077 6.761735916  
C 1.940584744 -1.301334800 6.865867786  
H 1.726747138 -1.804954213 7.806858862  
C 3.248748692 -1.337100012 6.360038035  
C 4.338699229 -2.062351754 7.114497955  
C 3.513485540 -0.679508650 5.157910968  
H 4.524486962 -0.686220482 4.757944795  
C 3.717588175 2.410255473 3.810442404  
C 5.071396841 2.453334127 4.151881353  
H 5.741192811 1.658300936 3.843022760  
C 5.582276577 3.534690261 4.876753766  
C 7.057412023 3.600311899 5.193674246  
C 4.694781027 4.529877873 5.308626761  
H 5.082285615 5.362942103 5.890646405  
C 3.323642312 4.477986685 5.027095270  
C 2.363293909 5.511137745 5.567156715  
C 2.850363519 3.421589582 4.243235737  
H 1.796252332 3.386643166 3.975031875  
C 4.012032309 -0.058034074 1.975069375  
C 3.663084826 -1.447660339 1.973619393  
H 2.995319030 -1.820502839 2.741490852  
C 4.150601780 -2.305656377 1.026740788  
H 3.882651483 -3.357999860 1.053784541  
C 4.997596821 -1.836154607 -0.009131048  
C 5.473761744 -2.705486337 -1.023503498  
H 5.177059681 -3.750618909 -0.994571171  
C 6.294684881 -2.236059214 -2.023553069  
H 6.655743074 -2.908830514 -2.795762727  
C 6.664787458 -0.870883774 -2.048414838  
H 7.302189272 -0.500938335 -2.846169393  
C 6.219454533 -0.003747750 -1.075835857  
H 6.499835204 1.041005719 -1.121467087  
C 5.376791776 -0.454766594 -0.021613554  
C 4.891063323 0.434666251 1.003973679  
C 5.455902884 1.824678347 1.025159431  
C 6.839453295 1.949691506 1.412995244  
C 7.585465246 0.856596400 1.937168106  
H 7.109752607 -0.112217733 2.040225006  
C 8.897344544 1.012602239 2.328303778  
H 9.441290952 0.164243594 2.733503935  
C 9.544799133 2.264806773 2.205463165  
H 10.581446328 2.371759388 2.509994184  
C 8.853706203 3.342383000 1.698349809  
H 9.335741569 4.311184334 1.597341912  
C 7.496484757 3.216114927 1.301197705  
C 6.772876599 4.314801200 0.774784806  
H 7.280906617 5.264742049 0.634886216  
C 5.450671444 4.187077908 0.444509782

H 4.923089779 5.041405828 0.038475028  
C 4.757355893 2.952685829 0.613644299  
C 2.325687844 4.582039061 0.472573150  
C 1.229307013 5.048218514 -0.268599080  
H 0.812463564 4.436697300 -1.062109820  
C 0.662597497 6.298120057 0.007644322  
C -0.492301596 6.815796708 -0.818224434  
C 1.211676847 7.073039871 1.034627146  
H 0.787507013 8.053951154 1.243078996  
C 2.298087903 6.625790097 1.795096306  
C 2.920314615 7.516401424 2.845273571  
C 2.832086792 5.361212422 1.523948024  
H 3.658914004 5.004612083 2.127127411  
C 3.217452336 2.821573540 -1.718533860  
C 3.298759933 3.967300401 -2.520155575  
H 3.162641653 4.951600242 -2.083946540  
C 3.531761303 3.858644078 -3.893775535  
C 3.577778391 5.086758405 -4.772111726  
C 3.691089955 2.581677242 -4.451226829  
H 3.867015540 2.490754732 -5.521560722  
C 3.630337502 1.424230428 -3.670087611  
C 3.752424775 0.047805930 -4.276927413  
C 3.404721676 1.560160380 -2.294617667  
H 3.359451722 0.666234824 -1.681311836  
P 2.904898614 1.000667914 2.998560794  
P 2.976413943 2.907704070 0.101776956  
Rh 1.643423465 1.118084559 0.973331044  
C -0.016937065 2.363681926 1.292000594  
C -0.985993063 1.611659705 2.186462363  
C -0.770080816 0.125054302 2.213316400  
H 0.519361725 -1.514814308 1.876054616  
C -1.988130219 -0.443621864 2.902480661  
H -0.804559439 1.933755186 3.227462433  
C -2.507082588 1.654587442 1.986030203  
H 0.393370675 3.254896045 1.765348912  
H -0.419333460 2.621630599 0.312618014  
H -2.341073752 -1.352940803 2.394576990  
H -1.811830849 -0.691969503 3.959006333  
H -2.987510555 2.580219492 2.313631266  
H -2.763551653 1.470298329 0.930000399  
O -2.976586430 0.596128041 2.836633457  
C 0.644325542 -0.490730976 -0.307787139  
C 0.592605392 -1.957626263 -0.624820211  
C 0.402000499 1.392288056 -2.071241797  
H 0.964295794 -2.523477416 0.235697639  
O 0.150238129 2.582389218 -2.121654522  
O 0.344188315 0.575844850 -3.142794641  
C 0.025879983 1.227421725 -4.393479047  
H -0.010028519 0.428863333 -5.134008136  
H -0.937453798 1.738193514 -4.325695996  
H 0.806905251 1.951381235 -4.639732113  
H 5.303679037 -1.984245447 6.605822185  
H 4.456527151 -1.652099518 8.123894398  
H 4.101124333 -3.126638267 7.225156117  
H -0.495660099 -0.533464521 7.852583258  
H -1.086689480 0.203972256 6.354951412  
H -1.022388390 -1.555286436 6.515539132  
H 7.335402504 4.569544868 5.616557227  
H 7.337236896 2.827571468 5.919562641  
H 7.659755819 3.433597968 4.294469808  
H 1.605396894 5.775023604 4.822696581

|          |              |              |              |    |              |              |              |
|----------|--------------|--------------|--------------|----|--------------|--------------|--------------|
| H        | 1.837344857  | 5.123645666  | 6.448134944  | C  | 6.850607444  | 1.160792078  | -0.743115569 |
| H        | 2.878445811  | 6.427518377  | 5.867561023  | H  | 7.030135740  | 2.208382113  | -0.534778257 |
| H        | 2.776208143  | -0.452821301 | -4.275159256 | C  | 5.881124288  | 0.454055493  | 0.023751208  |
| H        | 4.110934405  | 0.088397909  | -5.309392356 | C  | 5.139669588  | 1.078453507  | 1.082324410  |
| H        | 4.437765559  | -0.580138847 | -3.697988675 | C  | 5.395312416  | 2.525276917  | 1.367946944  |
| H        | 4.398376479  | 5.029531567  | -5.495022525 | C  | 6.622474467  | 2.897248763  | 2.009996061  |
| H        | 2.647975909  | 5.191258230  | -5.344772412 | C  | 7.562924292  | 1.932976357  | 2.468845471  |
| H        | 3.706648291  | 5.999214979  | -4.182996173 | H  | 7.351017599  | 0.878594829  | 2.328791159  |
| H        | -1.218293491 | 7.352904720  | -0.198982093 | C  | 8.732664185  | 2.320668873  | 3.083568972  |
| H        | -0.139486583 | 7.517721905  | -1.584900257 | H  | 9.436341059  | 1.566985355  | 3.424989913  |
| H        | -1.011857064 | 6.001824129  | -1.331766866 | C  | 9.030114525  | 3.692649972  | 3.273678090  |
| H        | 3.630389866  | 6.965527332  | 3.467070655  | H  | 9.960178420  | 3.983541827  | 3.752907163  |
| H        | 3.462183203  | 8.344753214  | 2.373159093  | C  | 8.137353667  | 4.650928918  | 2.849477661  |
| H        | 2.162836541  | 7.959631776  | 3.499861317  | H  | 8.351079925  | 5.707145805  | 2.991424697  |
| C        | 1.513765656  | -2.251919017 | -1.823685624 | C  | 6.920101866  | 4.282502057  | 2.216627432  |
| H        | 2.550719136  | -1.985892202 | -1.597551283 | C  | 5.989550958  | 5.250311830  | 1.768967521  |
| H        | 1.476164619  | -3.320854402 | -2.060784252 | H  | 6.219540308  | 6.303629343  | 1.903409805  |
| H        | 1.193949268  | -1.687013786 | -2.701232042 | C  | 4.813936685  | 4.878272514  | 1.166264996  |
| C        | -0.867785650 | -2.367589668 | -0.894061838 | H  | 4.134397167  | 5.648147847  | 0.824843431  |
| H        | -1.263611836 | -1.814773386 | -1.751583783 | C  | 4.489677271  | 3.507958001  | 0.970020155  |
| H        | -0.924028895 | -3.437558229 | -1.116938488 | C  | 2.032408116  | 4.606442235  | -0.206858427 |
| H        | -1.500838941 | -2.158494954 | -0.027595172 | C  | 1.587143681  | 4.960988704  | -1.484771040 |
| =====    |              |              |              |    |              |              |              |
| 15B-TS1' |              |              |              |    |              |              |              |
| =====    |              |              |              |    |              |              |              |
| C        | 0.259467629  | -0.127785250 | -0.062790638 | C  | 0.302595955  | 6.450236573  | -3.062366729 |
| C        | 0.209150838  | -0.215440134 | 1.922117612  | C  | 0.496582601  | 6.905877252  | -0.576704380 |
| C        | 2.642792469  | -0.098415374 | 4.292328488  | H  | -0.096208616 | 7.806256395  | -0.722645241 |
| C        | 1.590484360  | 0.229723646  | 5.158784949  | C  | 0.935807496  | 6.582157401  | 0.713388492  |
| H        | 0.997401881  | 1.120320274  | 4.980830635  | C  | 0.580486969  | 7.452662473  | 1.895708091  |
| C        | 1.302189045  | -0.553285166 | 6.277569595  | C  | 1.695378728  | 5.422432142  | 0.886852176  |
| C        | 0.181447619  | -0.169065680 | 7.216062694  | H  | 2.054361607  | 5.172606998  | 1.881096245  |
| C        | 2.093786756  | -1.683620001 | 6.516746057  | C  | 3.594411379  | 2.505112510  | -1.527636575 |
| H        | 1.877829352  | -2.307602687 | 7.381956723  | C  | 4.380713590  | 3.401593408  | -2.267318071 |
| C        | 3.162140221  | -2.025867735 | 5.681679662  | H  | 4.551456664  | 4.408136010  | -1.893925900 |
| C        | 3.992785235  | -3.256263421 | 5.963716742  | C  | 4.949008065  | 3.016864857  | -3.484062093 |
| C        | 3.435228811  | -1.218043498 | 4.568817611  | C  | 5.781421474  | 3.980379899  | -4.296896457 |
| H        | 4.275479786  | -1.470959653 | 3.929804551  | C  | 4.726543875  | 1.711217498  | -3.942532554 |
| C        | 3.598840481  | 2.497257949  | 3.899835117  | H  | 5.167888997  | 1.402206706  | -4.888519208 |
| C        | 4.786956988  | 2.422171857  | 4.630082114  | C  | 3.971233041  | 0.789660709  | -3.212943995 |
| H        | 5.426485563  | 1.547864266  | 4.544233120  | C  | 3.791352330  | -0.627144575 | -3.702535352 |
| C        | 5.171835081  | 3.475618692  | 5.466382694  | C  | 3.413283007  | 1.200561158  | -1.997377479 |
| C        | 6.491039042  | 3.425456629  | 6.198361336  | H  | 2.843465288  | 0.484808982  | -1.414884618 |
| C        | 4.322771491  | 4.582618329  | 5.581017216  | P  | 2.956120422  | 1.092424371  | 2.936360722  |
| H        | 4.608770397  | 5.399166280  | 6.241317842  | P  | 2.916430538  | 3.032057849  | 0.096818884  |
| C        | 3.112132995  | 4.667302029  | 4.882283986  | Rh | 1.517672487  | 1.325679917  | 1.043654332  |
| C        | 2.215021177  | 5.871735201  | 5.042278564  | C  | -0.078357792 | 2.572217041  | 1.616816369  |
| C        | 2.762032562  | 3.611681594  | 4.036586370  | C  | -0.677979412 | 1.928614440  | 2.845333387  |
| H        | 1.824637601  | 3.645926653  | 3.489697549  | C  | -0.617495183 | 0.429434207  | 2.755361183  |
| C        | 4.175563034  | 0.344660624  | 1.777758385  | H  | 0.387356295  | -1.280531618 | 2.004918016  |
| C        | 3.881629963  | -0.998484890 | 1.378090412  | C  | -1.624984085 | -0.097501066 | 3.752833350  |
| H        | 3.069119271  | -1.536723411 | 1.851949835  | H  | -0.075195977 | 2.213024220  | 3.723141761  |
| C        | 4.594188282  | -1.608596453 | 0.377987426  | C  | -2.148546932 | 2.118592656  | 3.256984572  |
| H        | 4.353950634  | -2.628328834 | 0.090636256  | H  | 0.316258443  | 3.573577527  | 1.776287793  |
| C        | 5.623712823  | -0.916793849 | -0.307295734 | H  | -0.776062549 | 2.585257580  | 0.781482027  |
| C        | 6.376584058  | -1.537253966 | -1.338173564 | H  | -2.303617682 | -0.820207821 | 3.273813571  |
| H        | 6.184711214  | -2.582977539 | -1.564409268 | H  | -1.164554413 | -0.580452378 | 4.622451750  |
| C        | 7.323765784  | -0.829755141 | -2.042805079 | H  | -2.367160813 | 3.061709121  | 3.764332851  |
| H        | 7.893396828  | -1.315676196 | -2.829828328 | H  | -2.816782328 | 2.011869502  | 2.386342024  |
| C        | 7.549600935  | 0.537082900  | -1.751096889 | O  | -2.344270914 | 1.060265836  | 4.205257204  |
| H        | 8.281354938  | 1.096738391  | -2.326082052 | C  | 0.413951133  | 0.964343522  | -0.730635364 |
|          |              |              |              | C  | 0.133217994  | 1.632177971  | -2.035504309 |

C 0.277834051 -1.575318365 -0.366926068  
 H 1.006514582 2.236183903 -2.293948641  
 O 1.089101964 -2.364219300 0.078216359  
 O -0.689839318 -1.890392304 -1.240711955  
 C -0.692664526 -3.265512806 -1.688516134  
 H -1.545745960 -3.348137380 -2.360751400  
 H 0.238326137 -3.495985262 -2.212788410  
 H -0.800890261 -3.941018177 -0.836657443  
 H 4.955096889 -3.221050344 5.444669785  
 H 4.188584687 -3.368683321 7.034927258  
 H 3.471779490 -4.163114628 5.632694911  
 H 0.568468265 0.396823668 8.072239524  
 H -0.566130283 0.455514221 6.717049540  
 H -0.325116887 -1.052809392 7.616137899  
 H 6.478899473 4.052751316 7.094297683  
 H 6.742411677 2.403699594 6.499470123  
 H 7.298175539 3.782211344 5.548103442  
 H 1.271132545 5.746379522 4.503660941  
 H 1.978270714 6.054199252 6.096251529  
 H 2.700983056 6.778473622 4.661829543  
 H 2.999189302 -1.145264208 -3.153332373  
 H 3.543111840 -0.654552389 -4.768469262  
 H 4.715652269 -1.197169717 -3.561030858  
 H 6.719368991 3.515667363 -4.619483233  
 H 5.248986256 4.293406173 -5.202893399  
 H 6.028202684 4.880772684 -3.727436132  
 H 0.004878687 7.499597194 -3.136778556  
 H 1.063230883 6.256283131 -3.825277238  
 H -0.572648322 5.838892237 -3.313301304  
 H 1.392552679 7.484319807 2.627816824  
 H 0.359452041 8.478145904 1.586885277  
 H -0.307965054 7.067890202 2.411370310  
 C -1.069452485 2.591159384 -1.905863900  
 H -1.285450299 3.037018000 -2.882908520  
 H -1.964079294 2.055860987 -1.571244549  
 H -0.858574117 3.404744366 -1.206908994  
 C -0.084725535 0.601031746 -3.157360511  
 H -0.241128618 1.116826318 -4.110810906  
 H 0.786652455 -0.052389154 -3.263656556  
 H -0.955336736 -0.025499110 -2.949033390

**Table S5.** Vibrational Frequencies of Optimized Structures

```

=====
1
=====
44.49 98.32 103.35 149.28 218.30 285.89
333.21 379.96 469.81 573.78 756.63 823.64
976.59 1048.83 1055.91 1105.29 1177.40 1215.15
1301.13 1421.87 1479.89 1481.68 1484.39 1494.21
1507.13 1796.81 2363.79 3036.81 3058.37 3103.98
3107.82 3134.87 3171.55
=====
2
=====
45.79 80.17 143.65 173.51 304.49 347.74
393.76 436.89 529.38 604.89 665.50 680.57
925.84 942.14 959.64 992.85 1015.44 1033.77
1039.41 1118.74 1180.36 1258.23 1295.82 1317.89
1386.29 1423.66 1467.00 1498.47 1515.07 1724.62
2248.28 2961.97 2982.81 3006.43 3076.75 3147.76
3162.20 3238.14 3495.98
=====
PPh3
  
```

```

=====
26.40 27.07 42.52 53.78 54.10 67.42
188.35 205.94 207.27 249.40 261.49 262.67
407.59 407.80 412.25 417.00 431.20 432.11
507.83 508.77 520.63 631.35 631.44 631.71
693.54 706.04 706.28 712.26 712.34 713.61
762.85 763.13 763.34 865.85 866.18 868.54
934.08 934.75 935.86 982.32 982.55 983.60
1004.42 1004.63 1005.07 1013.36 1013.41 1013.65
1051.89 1052.06 1052.41 1109.73 1109.94 1110.50
1111.59 1111.67 1118.47 1196.38 1196.80 1196.83
1221.24 1221.30 1222.61 1322.69 1327.05 1327.45
1362.24 1362.51 1362.65 1474.66 1475.71 1475.97
1524.27 1525.20 1525.28 1627.35 1628.14 1628.29
1645.05 1645.09 1646.89 3168.48 3168.54 3168.89
3176.20 3176.25 3176.29 3187.22 3187.31 3187.50
3198.86 3199.20 3199.49 3205.33 3205.68 3206.64
=====

```

3

```

=====
20.68 64.05 95.47 114.53 128.40 150.58
163.03 198.02 211.49 291.91 306.83 314.09
353.70 363.43 400.61 441.16 515.07 552.76
568.75 646.41 691.47 729.30 785.24 792.77
821.31 882.77 904.77 940.98 943.18 995.74
1015.36 1029.09 1046.28 1077.81 1095.54 1103.78
1117.31 1153.34 1179.59 1180.67 1204.54 1211.37
1219.87 1245.59 1247.78 1275.87 1296.85 1332.89
1355.61 1369.45 1384.64 1416.03 1422.37 1477.23
1478.87 1479.76 1493.91 1508.13 1509.06 1511.99
1530.06 1644.08 1743.33 1788.45 2966.69 2977.34
2981.17 3001.87 3022.35 3059.95 3064.22 3064.41
3080.39 3111.70 3135.74 3168.97 3210.45 3222.78
=====

```

4

```

=====
39.86 59.98 86.02 92.29 137.48 157.02
174.67 188.01 206.82 291.46 308.29 313.81
339.40 361.47 387.82 445.57 547.96 557.09
590.47 649.19 671.59 719.25 773.06 797.52
821.99 873.27 923.91 940.86 967.77 1002.65
1014.10 1040.61 1065.11 1075.07 1098.28 1103.07
1114.57 1116.03 1180.44 1183.22 1207.35 1213.67
1222.51 1242.46 1262.44 1272.55 1296.20 1336.88
1353.91 1372.16 1382.51 1418.30 1424.99 1479.71
1483.29 1492.60 1493.89 1507.32 1509.32 1513.79
1531.00 1629.31 1740.52 1774.63 2972.57 2980.38
2987.83 3003.12 3029.07 3055.51 3057.30 3074.18
3112.89 3130.24 3133.13 3164.06 3165.43 3213.94
=====

```

Rh(PPh<sub>3</sub>)<sub>2</sub>

```

=====
6.10 12.94 20.00 22.39 27.58 35.01
40.81 42.41 46.40 48.04 53.18 55.70
57.30 63.35 69.24 85.97 89.62 118.53
127.36 166.05 179.21 192.44 197.32 199.68
210.20 219.33 229.03 243.22 246.32 259.12
262.27 272.85 276.86 405.10 406.53 407.48
408.29 409.73 413.71 420.13 427.93 448.37
449.62 460.95 466.28 501.57 503.06 517.89
522.02 523.08 538.69 626.37 627.11 627.63

```

```

628.14 629.03 629.25 691.33 693.22 706.76
707.05 707.72 709.28 709.46 711.04 722.57
724.70 726.36 729.20 759.60 763.58 765.65
766.01 766.57 769.79 858.39 864.98 866.29
868.49 871.33 873.64 926.80 943.99 944.81
946.07 946.98 950.01 985.67 986.61 987.19
988.27 989.87 991.56 1006.56 1008.52 1010.53
1011.24 1012.03 1013.16 1016.20 1017.68 1018.56
1018.82 1019.15 1019.87 1047.08 1048.77 1049.17
1049.81 1051.34 1052.07 1101.22 1109.85 1111.99
1112.66 1113.79 1114.53 1115.78 1117.21 1120.55
1121.10 1124.99 1126.89 1199.84 1201.96 1202.28
1202.32 1203.43 1203.66 1218.34 1220.20 1221.96
1222.49 1223.46 1225.25 1322.02 1324.27 1330.29
1331.16 1332.96 1333.90 1363.18 1363.47 1363.77
1364.57 1366.80 1367.81 1468.13 1471.78 1476.42
1477.40 1477.97 1478.42 1514.14 1521.57 1523.52
1523.56 1524.11 1525.06 1606.92 1617.68 1625.72
1626.09 1626.41 1627.66 1631.28 1638.11 1641.91
1642.37 1643.32 1643.56 3136.30 3160.54 3170.98
3171.87 3178.41 3185.36 3187.20 3187.80 3188.73
3189.79 3189.87 3191.71 3194.21 3196.73 3197.64
3197.77 3200.53 3202.41 3203.00 3205.54 3205.83
3205.97 3207.55 3209.75 3211.82 3212.80 3214.24
3215.20 3215.31 3219.03
=====

```

5

```

=====
8.14 23.85 32.58 40.49 42.77 48.60
50.49 54.26 58.05 60.78 63.34 66.06
69.33 75.21 79.86 86.66 95.36 101.65
110.19 113.49 124.05 125.94 152.66 166.06
179.64 193.41 202.64 206.87 211.39 214.88
223.70 233.86 240.26 249.92 255.76 259.31
261.96 266.96 271.85 275.45 280.73 294.47
348.06 355.15 387.09 407.92 409.08 411.83
418.01 422.26 424.72 428.03 430.64 434.63
440.76 446.67 463.19 472.53 486.79 492.17
507.98 518.04 526.14 535.03 542.43 605.01
627.67 629.53 630.33 630.60 632.21 633.64
646.50 693.88 697.05 707.81 708.15 709.46
713.20 714.55 715.98 716.88 717.17 721.03
721.95 737.80 742.24 760.58 763.51 765.86
768.34 770.03 772.94 861.55 867.38 869.25
876.19 877.44 881.03 898.05 914.85 938.73
940.30 945.03 949.26 954.34 956.38 961.23
962.97 983.67 985.60 988.66 990.37 997.34
998.44 1000.38 1010.02 1012.38 1012.89 1013.35
1013.66 1013.86 1014.81 1016.29 1016.72 1018.63
1019.59 1020.23 1022.14 1038.78 1050.18 1051.12
1051.68 1052.42 1053.18 1054.21 1102.23 1109.04
1109.57 1110.92 1112.45 1115.63 1116.11 1117.05
1117.64 1118.43 1119.13 1121.77 1125.02 1192.40
1199.68 1201.25 1201.63 1202.15 1202.97 1203.05
1220.75 1222.89 1226.99 1229.16 1231.02 1235.99
1256.26 1298.96 1317.23 1321.47 1321.71 1326.79
1327.47 1334.83 1335.03 1361.41 1362.04 1366.71
1367.35 1367.96 1371.55 1372.18 1393.76 1453.80
1472.62 1473.00 1475.18 1476.15 1478.79 1479.76
1486.73 1505.91 1523.20 1525.12 1526.56 1526.93
1527.33 1530.33 1592.55 1623.84 1624.12 1625.77

```

1627.37 1629.39 1629.85 1641.23 1642.71 1642.75  
1644.72 1645.25 1647.16 2063.62 2994.86 3034.12  
3097.25 3107.56 3161.66 3165.41 3178.86 3180.64  
3188.58 3189.14 3190.23 3190.33 3190.40 3190.54  
3195.54 3196.95 3198.13 3199.14 3199.41 3200.97  
3204.90 3205.12 3205.49 3207.13 3212.12 3212.81  
3212.82 3214.53 3215.22 3215.81 3222.24 3222.83  
3231.52 3235.98 3243.90 3257.59 3258.57 3412.61

5-TS

-316.25 14.68 23.70 32.15 32.54 44.75  
49.77 51.89 53.51 56.69 61.24 64.13  
69.28 73.81 75.67 76.96 84.65 95.82  
97.27 102.97 106.10 114.53 123.04 154.71  
163.62 196.38 201.91 209.20 215.19 217.78  
232.40 242.76 244.45 255.46 257.18 262.62  
268.78 275.50 277.41 287.30 308.84 323.21  
357.29 406.54 411.02 413.26 414.11 418.75  
426.00 433.21 436.60 445.35 452.52 461.81  
466.03 470.78 489.54 506.33 509.85 518.75  
523.29 531.59 534.43 549.12 584.84 628.68  
630.01 630.28 631.18 631.58 632.40 658.91  
693.47 697.87 708.05 710.11 710.87 712.99  
713.45 714.63 718.35 719.61 720.12 726.84  
758.14 763.91 766.19 768.18 768.60 771.80  
772.02 775.02 862.47 873.58 873.91 874.58  
878.03 879.14 904.09 935.56 942.81 952.06  
954.17 954.80 956.21 959.16 964.43 973.97  
986.65 990.70 994.27 995.66 995.76 997.21  
999.30 1001.01 1012.92 1013.14 1013.35 1014.03  
1014.81 1015.90 1016.34 1017.20 1018.49 1018.73  
1019.55 1019.74 1020.75 1050.89 1052.11 1052.88  
1052.99 1053.59 1053.88 1091.54 1111.78 1112.92  
1113.46 1115.35 1116.32 1116.68 1118.14 1119.78  
1120.64 1121.74 1123.59 1124.12 1126.80 1150.73  
1197.96 1201.54 1201.82 1202.34 1202.59 1202.79  
1203.07 1223.14 1224.91 1226.71 1227.08 1230.26  
1231.44 1241.31 1305.03 1323.88 1325.49 1328.24  
1332.88 1333.17 1334.82 1335.42 1361.79 1365.74  
1366.15 1366.62 1367.13 1369.35 1371.53 1409.40  
1474.06 1474.35 1476.34 1477.60 1479.67 1480.44  
1486.91 1489.13 1509.41 1524.94 1525.17 1525.59  
1525.77 1527.08 1527.78 1624.76 1625.56 1627.01  
1627.11 1628.36 1628.67 1642.53 1643.06 1644.12  
1644.37 1644.73 1644.98 1755.05 2961.49 2986.03  
3104.65 3110.48 3112.25 3150.49 3170.99 3187.27  
3187.76 3187.86 3187.99 3188.08 3189.82 3195.18  
3195.84 3195.91 3196.63 3197.88 3197.99 3204.30  
3206.81 3208.29 3208.82 3209.36 3209.95 3212.63  
3214.01 3214.83 3215.43 3217.23 3217.43 3217.96  
3218.64 3221.17 3223.86 3225.94 3238.19 3269.58

6

2.11 5.54 10.19 19.92 26.49 28.56  
34.43 37.11 41.65 46.40 48.46 51.79  
55.59 56.41 62.41 64.16 71.80 78.08  
83.83 96.31 103.25 125.31 142.04 150.47  
175.53 190.53 195.13 198.92 203.88 220.19  
226.67 231.13 244.14 245.36 253.77 256.61

263.70 267.25 275.36 277.28 311.90 324.95  
404.29 405.42 406.88 407.24 413.50 414.75  
420.09 430.07 445.77 450.33 461.47 465.44  
502.94 507.72 517.34 520.26 526.16 534.34  
540.33 579.01 617.78 627.21 628.51 629.38  
629.92 630.63 630.71 645.20 676.55 695.25  
695.76 706.38 707.08 709.10 710.05 710.12  
712.27 720.99 722.39 725.34 728.21 762.84  
763.16 763.79 766.32 768.61 769.39 771.22  
781.49 817.44 863.18 865.36 866.81 869.47  
871.47 875.88 935.67 940.16 944.08 944.46  
946.51 946.77 954.94 984.12 984.52 986.31  
987.69 990.74 991.31 994.45 999.95 1011.65  
1011.98 1012.78 1013.13 1013.32 1013.89 1014.98  
1016.98 1018.19 1019.01 1019.12 1019.56 1020.47  
1050.86 1051.19 1051.53 1051.87 1052.36 1052.59  
1060.55 1071.39 1111.43 1112.55 1113.08 1114.39  
1115.24 1116.92 1117.31 1117.55 1118.24 1120.31  
1121.36 1123.64 1125.21 1144.32 1157.88 1200.49  
1202.25 1202.52 1202.70 1202.76 1202.80 1203.90  
1222.02 1222.40 1223.59 1224.90 1225.54 1226.88  
1230.93 1248.22 1305.95 1323.20 1324.16 1328.12  
1328.99 1330.20 1334.97 1335.05 1351.64 1364.11  
1364.24 1365.98 1366.64 1367.85 1369.74 1396.18  
1473.64 1473.94 1476.87 1477.77 1479.49 1479.94  
1486.04 1512.72 1523.12 1523.18 1524.23 1524.32  
1526.44 1527.04 1529.75 1621.58 1622.18 1627.13  
1627.41 1628.21 1628.57 1640.72 1640.75 1643.24  
1643.64 1643.85 1644.91 1691.08 2960.29 2990.65  
3055.83 3065.40 3075.80 3116.01 3139.03 3146.84  
3156.63 3159.63 3181.79 3181.86 3185.02 3188.03  
3188.41 3189.01 3189.52 3189.80 3191.39 3194.72  
3196.41 3197.12 3197.41 3197.56 3200.60 3203.53  
3204.85 3205.05 3205.70 3206.45 3208.76 3212.38  
3213.00 3213.74 3213.78 3214.31 3215.29 3222.12

7

9.47 22.44 23.48 34.44 36.15 43.57  
49.98 52.97 54.85 62.30 67.95 72.60  
73.33 85.76 97.34 108.88 120.37 136.19  
148.34 155.53 158.43 175.12 199.80 208.42  
216.45 221.07 228.71 246.00 248.46 266.90  
269.45 271.63 282.64 315.71 334.46 346.87  
371.39 404.67 407.48 413.48 424.06 428.62  
456.12 460.78 509.62 511.66 528.92 534.99  
542.81 563.92 604.49 627.83 629.12 629.87  
636.36 671.48 681.11 695.95 707.44 709.16  
711.78 719.79 725.52 747.06 761.88 764.52  
769.92 771.23 782.33 824.81 841.43 862.07  
864.03 879.48 940.23 941.06 947.30 961.24  
966.02 974.19 986.31 987.99 1002.00 1006.45  
1009.07 1010.98 1013.90 1014.24 1017.17 1020.16  
1026.84 1032.65 1043.02 1048.98 1051.85 1052.75  
1054.53 1075.93 1081.42 1107.49 1114.55 1116.23  
1117.06 1119.34 1120.33 1122.76 1145.60 1162.16  
1177.40 1201.01 1202.91 1203.81 1204.65 1212.87  
1214.30 1224.80 1225.86 1230.19 1251.79 1287.55  
1291.24 1321.15 1327.11 1333.80 1335.42 1342.71  
1366.56 1367.46 1373.56 1389.34 1411.30 1468.38  
1469.25 1474.56 1477.98 1478.75 1480.13 1480.63

1496.59 1499.72 1499.95 1524.28 1526.04 1526.32  
1528.54 1624.43 1628.05 1629.52 1641.45 1642.33  
1644.91 1645.41 1791.44 1952.71 2978.09 3003.52  
3040.78 3048.76 3059.50 3072.47 3089.27 3127.99  
3129.12 3137.17 3160.22 3168.51 3173.07 3175.16  
3176.11 3190.98 3193.25 3193.53 3195.46 3199.55  
3203.08 3203.22 3209.61 3212.49 3213.06 3217.13  
3219.55 3219.88 3220.52

7-TS

-287.15 20.79 26.69 33.89 46.38 46.70  
51.73 60.09 63.59 70.80 72.74 81.00  
85.08 96.33 108.73 116.27 119.39 134.65  
144.03 155.67 162.96 167.20 180.49 204.19  
212.63 219.50 221.90 238.14 254.56 261.80  
269.42 281.53 294.63 300.26 312.41 322.60  
355.65 365.18 400.79 409.30 414.11 423.03  
438.52 446.42 468.80 477.13 481.08 501.71  
510.03 522.67 538.96 547.20 600.17 628.46  
629.24 630.49 645.04 662.00 697.06 710.87  
711.96 713.59 721.08 724.05 747.96 756.36  
767.22 768.72 771.64 787.56 839.11 871.04  
874.12 877.87 889.74 936.54 950.30 951.73  
958.80 960.71 970.40 992.20 993.50 993.76  
996.85 999.17 1005.06 1012.35 1013.68 1014.44  
1019.96 1022.41 1023.08 1024.24 1028.83 1051.63  
1052.69 1053.33 1056.30 1083.34 1097.11 1114.22  
1116.52 1116.76 1118.19 1119.45 1124.90 1134.77  
1144.06 1178.85 1199.50 1203.63 1204.27 1204.82  
1215.42 1226.81 1228.03 1234.51 1240.02 1289.99  
1302.69 1327.07 1329.10 1334.71 1337.53 1362.32  
1368.57 1368.93 1375.10 1404.03 1413.03 1471.62  
1474.39 1475.00 1475.37 1479.72 1480.60 1490.79  
1493.43 1495.70 1504.15 1514.03 1525.35 1526.36  
1528.92 1624.52 1625.87 1627.88 1640.76 1642.40  
1642.60 1738.63 1791.38 2062.48 2996.29 3000.29  
3045.18 3072.65 3107.32 3120.12 3121.57 3122.44  
3123.42 3146.94 3158.80 3175.33 3188.16 3190.79  
3191.85 3194.51 3195.50 3198.25 3202.86 3205.94  
3206.51 3213.16 3214.41 3217.03 3219.61 3219.90  
3221.06 3247.51 3292.48

8A

12.93 23.77 28.58 35.70 39.97 44.08  
48.65 51.88 55.78 59.61 62.63 63.43  
65.15 68.78 73.92 75.88 81.29 83.43  
86.52 97.79 101.98 104.04 107.49 110.63  
114.41 119.60 126.51 133.66 138.24 151.90  
159.41 166.06 175.19 186.95 203.28 209.37  
212.66 223.93 227.83 237.78 241.72 250.34  
255.98 258.39 261.84 266.42 270.26 274.61  
279.68 280.68 287.31 289.45 305.71 344.13  
354.84 400.66 410.39 411.14 413.77 418.37  
421.62 424.10 429.50 431.53 440.12 447.38  
459.50 466.89 469.58 498.92 505.73 516.97  
520.36 532.98 535.73 537.57 555.47 606.24  
618.68 627.82 628.45 628.99 629.53 629.83  
632.09 632.65 673.59 692.56 697.25 706.67  
710.34 712.36 712.65 715.26 716.48 716.80

717.99 720.76 723.43 744.52 761.17 762.13  
762.83 767.35 770.00 770.96 779.40 821.32  
838.90 845.89 866.42 869.47 872.26 874.51  
875.80 877.06 937.50 945.02 945.68 949.29  
950.99 952.30 952.45 956.59 981.05 988.52  
988.99 990.53 994.25 994.76 997.28 1011.54  
1012.35 1012.38 1013.92 1014.33 1015.21 1015.38  
1015.60 1016.28 1016.98 1018.56 1020.10 1020.64  
1020.99 1024.08 1049.55 1051.22 1051.97 1053.44  
1053.69 1054.53 1055.88 1058.60 1075.27 1087.68  
1109.84 1110.83 1112.91 1114.05 1114.96 1115.94  
1116.99 1118.01 1119.57 1119.82 1122.03 1122.85  
1123.87 1142.40 1167.66 1180.64 1200.89 1201.37  
1201.46 1202.10 1202.77 1203.01 1208.10 1222.31  
1223.58 1225.97 1227.93 1228.65 1230.78 1233.29  
1233.84 1254.83 1278.27 1298.87 1322.88 1324.02  
1327.13 1331.17 1334.21 1335.44 1335.89 1351.85  
1363.84 1365.89 1366.50 1367.76 1370.99 1372.40  
1397.87 1405.83 1466.21 1472.25 1473.13 1475.99  
1476.70 1478.14 1478.22 1479.61 1479.93 1486.44  
1496.72 1503.12 1508.70 1525.15 1527.03 1527.50  
1527.84 1528.81 1529.13 1529.38 1624.18 1626.13  
1627.19 1627.89 1628.37 1629.36 1642.97 1643.67  
1644.51 1645.10 1645.36 1646.63 1698.66 1809.67  
2150.65 2985.18 3008.42 3030.44 3048.83 3069.93  
3074.20 3117.31 3119.08 3123.70 3137.98 3140.18  
3161.65 3187.21 3187.83 3188.02 3188.28 3188.83  
3190.90 3191.30 3193.85 3194.41 3196.83 3197.00  
3197.16 3202.38 3202.69 3204.26 3206.86 3209.01  
3209.41 3209.92 3210.83 3213.39 3214.39 3215.22  
3217.71 3218.30 3219.52 3220.24 3223.80 3224.90  
3245.35 3251.17 3256.51

8B

16.76 27.51 30.83 32.54 42.61 46.23  
49.07 51.59 56.53 57.50 60.25 63.31  
66.90 68.06 68.96 76.54 81.77 84.27  
88.84 90.62 97.64 104.11 110.00 113.58  
115.34 123.25 127.38 133.20 135.36 142.13  
159.48 165.96 170.24 180.14 198.57 206.88  
210.03 224.53 229.51 236.78 240.69 243.77  
253.95 257.88 259.71 265.25 266.35 272.04  
276.65 282.13 288.36 297.76 309.49 334.27  
354.90 375.25 408.40 410.17 414.44 417.29  
419.12 424.29 426.75 434.16 445.24 452.56  
463.10 465.89 473.78 501.13 509.99 514.78  
523.32 533.35 538.84 540.80 563.25 569.35  
619.18 630.09 630.26 630.61 630.90 631.88  
632.80 634.88 674.63 693.53 697.64 708.28  
710.48 712.25 713.44 715.05 715.68 718.48  
719.89 721.74 723.17 740.47 764.65 764.86  
766.10 766.95 769.44 771.45 773.44 819.32  
820.10 839.14 869.13 870.93 873.72 875.03  
876.29 883.86 934.48 944.39 946.32 950.12  
951.99 952.60 954.63 960.58 983.30 990.55  
990.97 992.86 994.50 996.54 1005.88 1012.05  
1013.36 1014.48 1014.90 1015.29 1016.06 1016.32  
1017.47 1017.73 1019.02 1019.44 1019.97 1022.85  
1027.81 1036.81 1051.33 1052.00 1052.41 1052.98  
1053.79 1054.43 1059.13 1062.34 1071.80 1092.19

1110.00 1110.73 1111.90 1114.69 1115.27 1116.62  
1117.58 1118.51 1119.07 1120.48 1121.20 1121.78  
1122.65 1144.60 1177.26 1178.84 1201.44 1201.66  
1201.92 1202.13 1203.23 1203.24 1209.90 1217.70  
1224.33 1226.88 1228.23 1229.62 1230.50 1232.95  
1233.89 1253.80 1259.32 1300.96 1322.41 1324.70  
1329.62 1329.85 1333.65 1334.18 1335.95 1353.26  
1364.30 1366.35 1368.08 1369.77 1369.87 1372.93  
1399.30 1415.32 1470.14 1472.78 1473.63 1476.03  
1476.13 1477.66 1478.45 1480.26 1480.63 1490.26  
1496.60 1503.93 1508.45 1526.48 1526.85 1527.69  
1528.45 1528.87 1529.33 1530.11 1624.14 1625.64  
1625.96 1627.12 1627.91 1629.00 1641.96 1642.83  
1643.67 1644.84 1645.38 1646.91 1706.36 1832.94  
2263.13 2975.32 2997.02 3015.87 3042.64 3068.95  
3070.88 3095.22 3107.98 3114.91 3125.09 3137.06  
3152.35 3163.00 3183.01 3184.11 3185.64 3186.74  
3186.98 3187.64 3191.16 3191.71 3192.56 3192.80  
3193.65 3194.19 3197.17 3202.35 3203.36 3203.80  
3206.54 3206.73 3208.68 3208.75 3208.97 3212.43  
3214.27 3214.82 3215.57 3216.21 3219.90 3222.86  
3225.94 3255.03 3256.93

=====

8C

=====

7.29 11.07 22.01 28.30 42.26 42.79  
46.08 47.85 50.64 53.42 59.38 61.33  
63.05 68.10 68.83 75.90 80.12 88.18  
91.92 93.61 99.96 108.53 114.43 120.82  
124.96 135.61 136.96 143.87 145.36 157.48  
164.20 165.98 178.81 189.74 199.97 206.29  
210.09 219.07 225.83 230.77 238.12 247.99  
256.12 259.31 260.04 262.32 264.33 275.91  
279.58 281.91 285.07 301.59 326.65 335.68  
349.14 380.22 409.63 411.97 416.94 417.33  
421.06 425.31 428.39 433.33 442.20 448.56  
463.21 468.36 476.30 498.61 505.57 517.72  
521.62 531.12 537.57 544.80 566.50 574.22  
627.65 629.40 630.23 631.74 632.57 633.03  
633.31 651.14 681.15 695.46 696.38 706.68  
710.70 712.03 714.28 714.77 715.25 715.96  
720.97 723.39 727.33 740.04 759.95 763.13  
767.65 768.70 770.22 771.41 784.10 798.71  
818.03 834.78 858.67 868.36 872.10 875.51  
877.46 884.98 929.05 939.77 941.17 945.78  
951.56 953.43 955.17 964.90 983.65 989.05  
993.35 997.47 997.85 998.16 1003.86 1007.81  
1012.84 1013.58 1014.24 1015.01 1015.09 1015.72  
1015.87 1016.62 1018.03 1019.50 1019.58 1020.23  
1022.25 1046.88 1052.92 1053.32 1053.32 1053.92  
1054.25 1054.34 1054.85 1069.15 1072.08 1085.35  
1108.40 1112.31 1112.96 1114.22 1115.36 1117.31  
1119.05 1119.64 1120.83 1121.04 1121.64 1123.44  
1123.92 1157.54 1180.35 1188.41 1202.77 1202.81  
1202.98 1203.47 1204.10 1204.15 1211.42 1217.56  
1226.00 1227.70 1228.27 1230.13 1231.30 1233.14  
1235.00 1253.85 1258.74 1311.09 1319.12 1324.13  
1328.43 1330.31 1333.85 1335.49 1338.04 1356.44  
1366.73 1366.92 1367.63 1370.24 1371.20 1372.67  
1401.62 1417.26 1464.18 1471.55 1473.36 1473.86  
1476.35 1477.75 1477.88 1480.80 1481.61 1491.34

1492.00 1505.55 1506.58 1527.45 1527.51 1527.89  
1528.76 1529.29 1529.72 1532.79 1623.98 1625.44  
1627.75 1628.86 1630.22 1630.39 1644.16 1644.35  
1645.36 1645.84 1646.28 1646.76 1702.27 1830.98  
2315.51 2986.39 3004.64 3046.50 3048.28 3051.73  
3066.62 3085.34 3106.31 3110.23 3127.24 3129.29  
3130.22 3183.25 3185.49 3185.78 3186.39 3186.99  
3187.61 3188.73 3192.29 3193.04 3193.53 3193.85  
3194.71 3195.63 3196.31 3202.43 3203.99 3204.11  
3205.73 3209.81 3210.36 3211.72 3213.14 3213.44  
3213.93 3217.56 3218.41 3223.29 3227.40 3229.42  
3230.10 3231.97 3232.07

=====

8C-BPR

=====

-47.44 17.50 24.24 29.37 33.93 36.74  
41.78 46.33 50.58 51.89 56.85 58.92  
61.20 65.95 67.80 71.42 74.47 79.05  
83.11 87.02 89.70 95.67 98.88 104.07  
113.08 114.10 119.02 122.52 131.77 145.35  
150.41 159.48 177.40 195.30 200.97 202.54  
207.70 211.02 217.96 221.30 226.21 232.51  
245.23 253.74 255.12 257.69 258.20 260.89  
264.05 277.59 278.37 298.39 307.01 331.87  
335.75 360.51 411.83 413.74 415.38 415.75  
418.33 423.70 429.67 436.80 438.29 453.64  
460.52 469.20 484.51 494.79 504.74 516.38  
524.06 526.28 534.37 539.62 562.21 575.41  
618.39 627.53 628.03 628.80 630.39 630.84  
632.00 642.15 677.01 694.39 695.50 709.50  
710.11 711.77 712.71 715.06 715.84 718.12  
718.38 719.16 725.97 740.80 764.19 764.96  
767.25 767.40 771.71 772.86 778.86 797.04  
826.91 835.09 870.05 872.11 873.25 874.59  
878.10 886.12 930.97 948.07 951.75 952.40  
954.36 957.19 962.67 966.33 991.00 991.73  
993.55 995.04 995.91 996.30 1003.28 1005.40  
1008.45 1013.30 1013.41 1014.16 1014.68 1014.97  
1016.18 1016.54 1017.34 1017.66 1019.23 1021.45  
1023.55 1038.90 1048.13 1049.59 1050.40 1051.86  
1052.28 1053.26 1063.57 1073.63 1076.15 1101.33  
1110.05 1111.67 1113.27 1114.54 1115.13 1116.40  
1117.43 1118.07 1118.85 1119.83 1120.43 1122.71  
1127.41 1157.41 1176.09 1176.15 1199.80 1201.63  
1201.96 1202.52 1203.12 1203.58 1206.24 1218.04  
1222.68 1224.54 1229.04 1229.19 1231.64 1232.41  
1234.75 1254.40 1297.66 1311.83 1321.28 1322.87  
1327.40 1329.50 1330.55 1333.75 1334.51 1350.26  
1361.59 1366.99 1368.29 1369.08 1371.62 1372.50  
1396.56 1418.29 1470.81 1472.40 1474.25 1475.09  
1475.99 1476.83 1478.13 1479.78 1481.43 1489.89  
1491.31 1500.44 1506.54 1523.88 1526.52 1526.99  
1527.58 1528.30 1528.36 1532.67 1622.72 1622.79  
1625.89 1627.68 1628.42 1628.91 1641.67 1641.98  
1642.41 1643.37 1643.99 1645.19 1692.76 1790.64  
2302.27 2993.76 3004.97 3018.02 3041.30 3068.54  
3069.86 3111.16 3115.64 3122.84 3127.95 3151.95  
3179.82 3183.79 3184.57 3185.09 3185.21 3188.71  
3190.10 3190.45 3191.02 3192.33 3193.57 3193.90  
3195.25 3196.24 3196.73 3200.53 3200.65 3201.15  
3203.70 3204.27 3206.81 3207.61 3208.98 3209.24



3210.05 3211.25 3213.20 3214.84 3215.02 3215.56  
3216.88 3218.39 3264.31

=====

8A-TS1

=====

-193.65 10.30 25.26 29.00 33.57 39.81  
44.75 47.53 52.91 53.89 57.36 60.77  
63.75 67.12 69.76 75.01 75.29 78.87  
79.86 88.83 90.25 96.84 98.77 102.30  
113.32 114.50 129.37 138.96 148.20 155.16  
168.05 174.33 180.33 185.62 206.12 209.65  
215.42 218.26 221.84 226.53 233.31 241.82  
255.38 256.14 259.39 260.66 267.92 273.06  
274.35 282.14 286.40 288.94 306.28 336.86  
374.65 406.83 408.52 410.63 414.46 418.55  
420.68 423.79 426.44 433.71 435.39 439.68  
467.56 470.47 481.95 499.24 503.59 517.84  
520.26 530.57 533.70 534.92 557.40 612.63  
627.51 628.01 630.01 630.75 631.52 632.01  
632.79 674.05 683.42 692.22 693.97 704.84  
706.68 709.31 710.64 711.50 713.63 714.27  
716.25 720.39 721.70 752.25 757.98 761.11  
764.95 765.49 767.23 769.58 771.95 817.19  
848.10 860.01 864.00 865.75 870.06 870.54  
881.45 883.64 935.27 942.18 942.32 943.99  
945.23 947.81 953.52 961.53 981.01 981.92  
985.05 987.98 989.42 990.71 1002.34 1008.32  
1011.71 1011.94 1012.39 1013.48 1013.99 1014.71  
1015.37 1015.66 1016.83 1018.22 1020.66 1021.86  
1023.22 1024.15 1048.36 1051.76 1052.52 1053.63  
1054.19 1054.77 1055.17 1062.69 1082.21 1083.94  
1107.05 1108.74 1111.41 1114.50 1115.67 1115.88  
1117.40 1118.90 1119.31 1119.82 1121.18 1121.86  
1124.74 1139.84 1166.51 1181.23 1200.89 1202.03  
1202.25 1202.33 1203.42 1203.71 1207.85 1219.75  
1221.82 1226.66 1226.76 1229.39 1230.10 1236.55  
1237.16 1258.62 1263.78 1290.71 1322.58 1324.08  
1327.67 1328.87 1331.57 1335.28 1336.56 1349.54  
1363.84 1365.61 1366.56 1368.20 1368.61 1374.64  
1396.24 1405.92 1468.11 1473.77 1474.29 1475.75  
1476.02 1479.34 1479.85 1480.09 1480.63 1486.55  
1497.06 1504.10 1505.87 1524.69 1526.18 1526.52  
1527.60 1527.92 1528.27 1531.49 1625.30 1626.84  
1627.08 1628.86 1629.47 1630.54 1642.90 1644.47  
1644.96 1645.17 1646.10 1646.85 1662.32 1803.53  
1994.66 2979.15 3025.18 3029.95 3040.19 3068.15  
3068.74 3108.77 3114.87 3119.57 3132.64 3152.79  
3154.80 3156.45 3172.50 3181.32 3183.53 3184.19  
3186.60 3186.78 3187.79 3188.66 3188.87 3193.19  
3194.13 3194.83 3196.56 3198.12 3198.84 3202.27  
3202.69 3204.50 3205.87 3206.35 3209.62 3211.68  
3212.12 3213.58 3213.96 3218.54 3223.98 3229.02  
3237.26 3256.81 3273.75

=====

8A-TS2

=====

-228.41 15.47 18.01 31.24 36.05 38.38  
43.21 44.78 46.74 52.02 54.64 56.77  
59.98 62.50 65.77 71.66 73.41 76.45  
80.57 83.48 91.93 95.90 99.00 103.23  
106.14 115.19 128.53 130.16 135.58 152.31

161.37 164.36 170.65 194.79 201.94 206.93  
210.47 216.33 219.71 222.69 229.92 232.43  
241.81 254.40 256.17 259.12 261.76 262.32  
278.10 280.88 283.48 296.92 337.61 348.19  
396.93 404.93 406.65 410.81 415.72 418.59  
421.61 425.51 434.96 438.41 440.06 454.97  
461.33 467.32 479.28 498.45 505.11 516.09  
519.78 532.32 539.52 561.22 570.95 628.47  
629.80 630.34 631.07 631.62 633.16 633.82  
650.24 663.60 679.39 694.40 698.09 705.50  
707.79 709.12 710.44 712.86 714.23 717.92  
719.94 722.54 725.15 747.64 760.32 762.82  
765.55 767.81 768.98 770.37 775.32 821.12  
831.06 849.18 863.58 864.94 868.13 873.73  
877.51 878.46 936.13 940.35 941.40 944.42  
950.29 956.59 958.43 980.30 982.89 984.36  
987.02 989.84 994.55 995.82 997.30 1004.46  
1008.35 1011.93 1013.60 1013.70 1013.95 1014.21  
1015.29 1015.70 1016.40 1016.88 1017.81 1018.97  
1020.90 1042.86 1051.07 1051.43 1051.84 1053.58  
1053.97 1054.04 1054.49 1059.03 1077.53 1082.17  
1107.94 1109.35 1111.85 1113.38 1115.04 1117.21  
1117.77 1118.18 1119.54 1119.88 1122.10 1123.36  
1123.73 1138.64 1177.03 1177.97 1199.43 1200.09  
1201.88 1202.59 1202.88 1203.34 1206.28 1213.24  
1219.97 1223.07 1225.16 1227.58 1229.24 1230.26  
1234.87 1249.11 1261.82 1290.40 1325.32 1326.17  
1327.24 1329.75 1335.96 1337.12 1337.61 1353.76  
1362.01 1363.57 1368.61 1369.77 1370.80 1374.45  
1395.90 1402.39 1470.41 1473.77 1474.61 1475.50  
1476.48 1476.97 1478.87 1480.52 1480.83 1481.74  
1495.52 1504.29 1511.98 1524.66 1526.62 1527.60  
1528.09 1528.37 1529.76 1530.74 1625.79 1626.41  
1627.58 1627.84 1629.83 1630.60 1643.38 1644.30  
1644.79 1645.29 1645.65 1647.39 1665.16 1779.99  
1882.69 2972.83 3010.63 3039.82 3041.36 3052.36  
3061.45 3065.91 3113.67 3121.83 3127.20 3150.79  
3154.98 3169.18 3178.71 3182.36 3182.92 3183.37  
3185.23 3186.95 3187.65 3188.46 3191.07 3191.84  
3192.20 3192.76 3196.63 3198.97 3199.73 3202.33  
3202.79 3205.08 3209.32 3209.61 3210.62 3212.20  
3213.74 3215.81 3225.14 3225.90 3227.59 3230.73  
3230.74 3234.28 3245.15

=====

8B-TS1

=====

-128.87 2.31 8.95 29.29 35.74 35.86  
40.24 46.63 48.29 50.60 52.50 54.94  
55.58 59.43 61.39 68.36 70.96 73.99  
79.40 81.28 91.41 96.22 100.84 110.46  
116.68 119.72 132.48 136.17 143.14 146.28  
155.86 167.14 177.61 192.34 196.77 202.32  
210.17 224.63 228.39 233.58 236.69 239.78  
250.30 252.45 254.69 258.86 261.98 272.31  
277.27 281.37 282.65 296.98 307.80 353.43  
380.91 407.35 409.63 410.48 412.26 420.69  
422.18 426.37 427.75 434.60 438.98 441.74  
463.58 466.74 502.21 508.72 513.84 516.47  
518.99 529.94 535.56 537.57 566.93 609.48  
626.54 627.26 628.77 630.28 630.94 631.46  
632.60 661.58 677.14 695.31 697.44 706.90

|         |         |         |         |         |         |
|---------|---------|---------|---------|---------|---------|
| 708.22  | 711.60  | 712.30  | 712.58  | 714.02  | 715.63  |
| 717.08  | 721.45  | 721.82  | 744.17  | 761.59  | 763.42  |
| 764.84  | 765.68  | 767.69  | 767.85  | 770.43  | 816.07  |
| 848.58  | 863.80  | 865.81  | 867.44  | 870.07  | 873.98  |
| 875.20  | 876.80  | 940.62  | 943.52  | 943.99  | 945.84  |
| 946.09  | 949.90  | 953.01  | 956.52  | 982.08  | 985.15  |
| 986.60  | 988.04  | 988.87  | 991.90  | 994.42  | 1008.38 |
| 1009.61 | 1012.45 | 1012.54 | 1013.54 | 1014.50 | 1014.94 |
| 1016.18 | 1016.66 | 1017.18 | 1017.52 | 1017.97 | 1019.70 |
| 1021.74 | 1033.38 | 1048.01 | 1050.99 | 1051.35 | 1051.82 |
| 1052.48 | 1053.02 | 1053.36 | 1058.12 | 1080.58 | 1083.47 |
| 1111.27 | 1112.77 | 1114.10 | 1114.33 | 1114.95 | 1116.60 |
| 1117.34 | 1118.49 | 1118.67 | 1119.52 | 1120.15 | 1121.54 |
| 1122.68 | 1141.35 | 1159.53 | 1177.72 | 1200.44 | 1200.84 |
| 1201.82 | 1203.05 | 1203.18 | 1203.25 | 1208.47 | 1215.16 |
| 1221.70 | 1223.12 | 1225.94 | 1226.60 | 1228.92 | 1230.12 |
| 1231.48 | 1255.11 | 1286.42 | 1293.96 | 1324.81 | 1325.75 |
| 1327.18 | 1329.19 | 1331.71 | 1336.89 | 1338.71 | 1349.11 |
| 1364.39 | 1365.07 | 1366.61 | 1367.63 | 1368.69 | 1371.11 |
| 1396.41 | 1409.01 | 1471.92 | 1473.48 | 1475.08 | 1475.35 |
| 1476.97 | 1477.82 | 1479.99 | 1480.92 | 1481.11 | 1485.20 |
| 1495.05 | 1505.97 | 1506.85 | 1525.40 | 1525.68 | 1526.61 |
| 1526.78 | 1527.12 | 1527.61 | 1528.61 | 1625.22 | 1626.23 |
| 1627.22 | 1628.70 | 1630.97 | 1631.13 | 1642.91 | 1643.71 |
| 1644.54 | 1645.70 | 1647.14 | 1647.60 | 1668.77 | 1799.64 |
| 1954.68 | 2989.26 | 3011.51 | 3032.20 | 3053.26 | 3067.08 |
| 3079.46 | 3105.16 | 3121.20 | 3131.94 | 3136.12 | 3149.97 |
| 3170.56 | 3176.47 | 3180.72 | 3181.58 | 3183.50 | 3184.25 |
| 3185.55 | 3186.22 | 3187.40 | 3189.23 | 3189.85 | 3190.89 |
| 3192.64 | 3192.96 | 3196.09 | 3198.29 | 3199.18 | 3199.56 |
| 3201.77 | 3206.58 | 3208.34 | 3209.56 | 3209.69 | 3210.21 |
| 3212.16 | 3214.54 | 3215.52 | 3217.39 | 3219.51 | 3220.78 |
| 3221.53 | 3224.77 | 3248.66 |         |         |         |

=====

8B-TS2

=====

|         |         |         |         |         |         |
|---------|---------|---------|---------|---------|---------|
| -212.69 | 7.23    | 12.85   | 16.95   | 24.85   | 34.83   |
| 38.33   | 43.35   | 47.94   | 50.42   | 51.95   | 55.19   |
| 60.37   | 64.06   | 66.58   | 67.82   | 70.15   | 78.58   |
| 79.72   | 81.63   | 86.21   | 93.37   | 97.46   | 103.06  |
| 104.93  | 115.40  | 121.91  | 125.35  | 130.24  | 139.29  |
| 148.08  | 169.10  | 189.60  | 196.96  | 202.42  | 205.47  |
| 214.70  | 217.32  | 223.35  | 229.01  | 230.61  | 243.52  |
| 253.48  | 254.39  | 256.60  | 259.09  | 260.66  | 262.20  |
| 277.10  | 280.23  | 285.99  | 297.85  | 330.86  | 346.03  |
| 364.47  | 404.97  | 406.68  | 410.13  | 412.80  | 415.22  |
| 419.77  | 421.53  | 422.41  | 434.38  | 436.85  | 443.85  |
| 458.07  | 466.80  | 488.56  | 499.19  | 510.73  | 514.40  |
| 518.05  | 525.78  | 532.33  | 539.72  | 568.87  | 626.17  |
| 628.60  | 629.01  | 630.00  | 631.20  | 632.46  | 633.15  |
| 658.33  | 678.85  | 693.94  | 697.25  | 705.38  | 707.93  |
| 708.53  | 709.65  | 712.13  | 713.10  | 715.26  | 717.10  |
| 724.88  | 726.46  | 736.39  | 757.65  | 761.48  | 763.98  |
| 765.96  | 768.71  | 769.35  | 769.59  | 772.83  | 820.31  |
| 837.01  | 849.24  | 865.42  | 866.53  | 870.41  | 872.59  |
| 874.84  | 883.53  | 933.19  | 942.34  | 942.66  | 950.68  |
| 951.86  | 955.03  | 956.84  | 978.23  | 983.91  | 985.29  |
| 985.85  | 990.66  | 991.59  | 994.77  | 996.13  | 1001.32 |
| 1009.49 | 1011.04 | 1011.66 | 1012.91 | 1013.50 | 1014.08 |
| 1015.51 | 1016.23 | 1016.47 | 1016.83 | 1016.98 | 1019.92 |
| 1020.21 | 1038.92 | 1049.88 | 1051.17 | 1052.03 | 1052.45 |

|         |         |         |         |         |         |
|---------|---------|---------|---------|---------|---------|
| 1052.71 | 1052.91 | 1053.95 | 1058.96 | 1076.61 | 1081.56 |
| 1107.26 | 1110.19 | 1111.36 | 1113.88 | 1114.76 | 1115.31 |
| 1115.71 | 1116.44 | 1119.00 | 1119.96 | 1120.83 | 1122.44 |
| 1126.62 | 1132.26 | 1169.27 | 1174.99 | 1200.20 | 1200.56 |
| 1201.30 | 1202.05 | 1202.36 | 1202.69 | 1205.43 | 1210.82 |
| 1220.41 | 1223.11 | 1224.76 | 1227.51 | 1228.41 | 1232.54 |
| 1233.80 | 1252.69 | 1272.49 | 1291.93 | 1323.41 | 1325.72 |
| 1326.67 | 1328.62 | 1334.81 | 1336.22 | 1336.58 | 1355.50 |
| 1362.77 | 1363.63 | 1368.38 | 1369.35 | 1373.12 | 1374.18 |
| 1396.21 | 1410.06 | 1468.05 | 1471.80 | 1473.26 | 1474.03 |
| 1475.11 | 1476.18 | 1479.16 | 1480.05 | 1480.44 | 1491.00 |
| 1494.05 | 1504.31 | 1512.60 | 1525.53 | 1525.94 | 1526.20 |
| 1528.09 | 1528.50 | 1529.78 | 1530.26 | 1623.89 | 1625.42 |
| 1626.32 | 1626.81 | 1629.46 | 1630.06 | 1641.78 | 1643.93 |
| 1644.04 | 1644.67 | 1646.14 | 1646.86 | 1665.08 | 1789.80 |
| 1917.87 | 2969.33 | 3013.98 | 3033.43 | 3042.20 | 3054.57 |
| 3065.24 | 3068.86 | 3115.98 | 3116.96 | 3126.40 | 3151.37 |
| 3151.84 | 3169.55 | 3182.82 | 3183.19 | 3184.82 | 3185.37 |
| 3186.58 | 3187.08 | 3188.18 | 3188.43 | 3190.62 | 3190.85 |
| 3192.83 | 3194.44 | 3194.89 | 3199.09 | 3200.38 | 3201.12 |
| 3203.09 | 3204.51 | 3205.77 | 3208.35 | 3210.93 | 3211.62 |
| 3212.28 | 3212.66 | 3216.07 | 3226.54 | 3227.78 | 3228.07 |
| 3235.01 | 3244.96 | 3254.20 |         |         |         |

=====

9A

=====

|         |         |         |         |         |         |
|---------|---------|---------|---------|---------|---------|
| 21.87   | 27.80   | 30.11   | 38.04   | 41.89   | 48.31   |
| 49.11   | 51.95   | 58.12   | 60.42   | 64.43   | 67.49   |
| 70.27   | 73.34   | 73.60   | 79.09   | 82.75   | 86.24   |
| 91.01   | 93.39   | 94.62   | 98.83   | 103.83  | 106.13  |
| 118.08  | 123.50  | 130.64  | 150.04  | 154.47  | 172.35  |
| 179.11  | 191.61  | 196.25  | 197.85  | 202.23  | 204.76  |
| 209.26  | 219.27  | 227.16  | 230.02  | 238.96  | 250.58  |
| 253.86  | 257.71  | 261.31  | 263.56  | 278.18  | 278.68  |
| 282.95  | 312.23  | 317.65  | 343.16  | 368.52  | 404.32  |
| 408.93  | 411.12  | 412.08  | 415.65  | 416.65  | 423.61  |
| 428.08  | 432.72  | 437.18  | 443.02  | 451.57  | 459.61  |
| 472.56  | 493.28  | 500.08  | 506.72  | 514.74  | 522.28  |
| 528.88  | 537.73  | 541.71  | 576.76  | 616.04  | 630.03  |
| 630.70  | 630.98  | 631.93  | 632.50  | 633.36  | 647.98  |
| 695.73  | 698.84  | 705.80  | 707.96  | 708.49  | 709.34  |
| 710.01  | 711.27  | 712.32  | 714.96  | 717.16  | 719.47  |
| 722.95  | 744.56  | 756.33  | 759.64  | 762.07  | 763.83  |
| 765.82  | 767.23  | 768.47  | 792.25  | 798.33  | 858.19  |
| 862.88  | 865.01  | 868.42  | 868.93  | 871.62  | 901.46  |
| 915.13  | 934.51  | 938.99  | 942.16  | 946.19  | 948.10  |
| 948.38  | 952.80  | 957.09  | 962.63  | 982.51  | 983.89  |
| 987.31  | 988.70  | 989.37  | 990.34  | 1007.27 | 1007.72 |
| 1011.49 | 1012.20 | 1013.58 | 1014.23 | 1014.73 | 1015.34 |
| 1016.30 | 1016.70 | 1017.59 | 1017.90 | 1018.20 | 1018.77 |
| 1027.31 | 1049.87 | 1051.66 | 1052.42 | 1052.50 | 1053.02 |
| 1053.37 | 1053.51 | 1068.84 | 1080.07 | 1104.89 | 1110.93 |
| 1111.82 | 1113.29 | 1114.26 | 1115.35 | 1116.34 | 1117.48 |
| 1117.70 | 1118.57 | 1120.05 | 1121.04 | 1122.24 | 1123.13 |
| 1155.10 | 1179.80 | 1181.01 | 1199.79 | 1200.71 | 1201.06 |
| 1201.35 | 1201.78 | 1202.79 | 1216.82 | 1219.81 | 1222.89 |
| 1224.44 | 1225.31 | 1227.63 | 1230.20 | 1231.32 | 1236.81 |
| 1270.86 | 1283.13 | 1289.14 | 1315.76 | 1324.35 | 1324.80 |
| 1327.69 | 1328.50 | 1334.85 | 1335.12 | 1338.83 | 1355.28 |
| 1361.26 | 1363.45 | 1363.91 | 1365.99 | 1368.46 | 1370.37 |
| 1400.37 | 1417.53 | 1473.11 | 1474.69 | 1474.90 | 1475.22 |

1478.21 1479.86 1480.72 1483.22 1487.76 1491.87  
1498.66 1501.48 1502.97 1524.67 1525.16 1525.52  
1525.94 1526.95 1527.79 1529.46 1620.48 1624.66  
1625.74 1626.09 1626.57 1627.98 1628.83 1642.06  
1643.01 1643.82 1644.15 1644.51 1645.95 1680.52  
1763.17 2944.02 2982.89 3039.70 3046.50 3065.00  
3078.53 3098.02 3118.88 3129.16 3131.35 3144.32  
3144.50 3172.08 3172.60 3182.31 3185.69 3186.66  
3187.73 3189.17 3189.63 3190.63 3191.20 3195.62  
3196.15 3197.09 3198.19 3199.19 3202.08 3203.02  
3204.66 3208.30 3209.49 3209.78 3211.20 3212.93  
3213.79 3215.41 3216.95 3217.76 3219.81 3224.85  
3232.42 3233.01 3262.07

=====

9B

=====

11.87 17.85 21.17 28.65 34.55 35.78  
41.36 43.98 48.68 49.89 53.29 55.47  
58.09 66.98 68.26 73.98 83.85 84.02  
87.22 91.57 97.89 105.47 114.12 115.02  
122.76 129.30 132.21 137.32 153.50 154.82  
161.07 180.64 184.45 198.66 203.03 214.19  
215.29 218.29 232.88 239.82 242.18 257.02  
259.22 260.81 263.91 264.95 274.43 286.11  
298.51 314.11 323.16 350.20 371.77 399.85  
405.25 408.88 416.38 417.35 418.56 423.29  
424.74 431.70 435.97 447.57 458.10 471.53  
475.75 482.76 502.22 509.47 515.09 522.12  
530.03 535.12 547.72 607.80 615.99 626.70  
628.58 630.34 630.73 631.29 632.66 634.68  
681.29 692.01 695.11 702.32 705.16 709.87  
712.33 715.42 715.86 719.14 721.07 723.09  
723.88 726.76 755.60 761.10 765.73 768.26  
769.84 770.30 771.46 783.26 795.59 849.66  
856.98 867.72 870.18 871.05 878.07 878.87  
932.91 946.27 947.24 948.06 950.83 957.35  
958.82 962.31 971.62 978.95 982.29 990.66  
992.27 994.65 998.93 1000.03 1008.69 1011.80  
1012.93 1013.18 1013.34 1014.30 1015.03 1016.59  
1017.01 1019.70 1020.76 1022.22 1023.10 1037.84  
1042.01 1051.31 1051.89 1051.99 1053.02 1053.76  
1054.06 1067.43 1081.62 1102.81 1106.06 1109.79  
1110.14 1114.67 1114.97 1116.10 1117.18 1118.60  
1120.58 1121.46 1125.16 1126.17 1128.69 1133.19  
1163.97 1174.26 1178.05 1185.73 1201.04 1201.13  
1202.19 1203.23 1203.64 1204.46 1219.00 1222.27  
1226.08 1226.87 1228.71 1229.73 1235.47 1236.41  
1262.58 1276.02 1292.79 1318.25 1319.78 1322.18  
1322.98 1326.19 1332.71 1335.68 1348.98 1362.63  
1365.82 1366.45 1367.33 1370.33 1370.74 1373.57  
1410.66 1415.74 1467.33 1472.03 1472.50 1474.62  
1475.55 1479.40 1479.94 1480.00 1490.58 1494.16  
1503.87 1506.25 1507.03 1524.28 1525.14 1525.77  
1526.37 1527.04 1529.97 1530.54 1591.40 1623.20  
1623.71 1624.66 1625.96 1627.95 1628.30 1641.92  
1642.12 1642.41 1643.13 1644.21 1644.65 1645.54  
1790.29 2986.14 3024.62 3048.63 3050.97 3057.01  
3063.95 3108.71 3109.69 3126.15 3143.76 3151.14  
3168.23 3178.44 3181.47 3182.87 3186.69 3187.82  
3189.69 3190.34 3191.17 3191.37 3192.74 3193.63  
3196.24 3198.38 3198.60 3199.43 3200.00 3203.33

3206.22 3207.93 3211.02 3212.02 3212.75 3213.51  
3214.34 3215.51 3223.08 3224.81 3230.50 3231.76  
3238.60 3241.28 3242.69

=====

11A

=====

5.95 10.10 19.17 20.66 24.41 27.05  
31.48 37.02 42.10 42.81 46.57 52.35  
54.32 60.12 61.31 66.13 69.06 70.38  
76.23 81.26 83.97 87.38 94.13 101.49  
106.50 125.11 142.49 152.42 155.72 172.75  
190.24 195.37 197.68 203.81 205.54 216.83  
223.94 227.41 236.52 242.17 247.53 249.97  
254.46 257.50 261.66 268.35 270.17 272.83  
276.48 289.12 315.14 325.53 353.60 376.41  
406.68 407.43 408.72 410.38 415.13 416.06  
418.27 422.55 431.13 444.57 457.87 464.30  
467.76 501.28 508.61 511.67 512.99 517.81  
532.33 537.94 570.63 620.26 628.85 629.51  
629.77 630.12 630.52 631.71 632.55 653.00  
685.56 690.56 694.60 696.27 709.23 709.77  
709.98 710.83 711.50 712.29 719.50 721.19  
724.35 726.70 762.40 763.16 764.98 766.37  
768.09 770.37 774.40 792.50 813.29 836.95  
864.63 867.01 868.76 871.80 874.03 875.21  
909.11 940.10 945.92 946.96 948.00 953.05  
955.04 960.66 969.19 986.88 987.38 988.02  
989.46 991.74 993.92 994.46 997.05 1012.20  
1012.82 1012.94 1013.42 1014.26 1015.01 1017.38  
1017.97 1018.30 1018.77 1019.45 1020.91 1026.46  
1042.19 1050.65 1051.00 1051.81 1052.39 1052.92  
1053.58 1060.82 1087.65 1094.17 1111.86 1113.21  
1113.30 1114.59 1114.97 1115.74 1116.97 1118.56  
1119.53 1119.64 1120.00 1120.35 1123.35 1128.36  
1164.21 1178.83 1201.09 1202.04 1202.26 1202.36  
1203.34 1203.42 1208.08 1214.84 1223.51 1223.82  
1224.45 1226.99 1228.61 1228.86 1232.00 1242.76  
1261.74 1283.93 1291.05 1322.98 1325.10 1328.89  
1329.89 1332.63 1336.34 1347.79 1355.89 1363.51  
1363.88 1367.47 1368.06 1370.00 1370.13 1391.59  
1405.47 1408.37 1452.70 1469.12 1472.65 1475.06  
1476.26 1476.73 1478.62 1479.83 1481.01 1494.45  
1497.05 1507.76 1511.94 1523.58 1524.62 1525.71  
1525.79 1526.83 1527.56 1530.29 1622.74 1624.46  
1625.04 1626.51 1627.09 1628.05 1637.79 1641.38  
1642.37 1642.86 1643.26 1643.45 1644.24 1708.75  
1771.07 2962.01 2968.01 3020.22 3021.82 3062.44  
3079.27 3080.14 3095.81 3102.05 3119.32 3129.16  
3134.71 3138.11 3141.36 3156.91 3174.88 3184.11  
3186.80 3188.50 3189.09 3189.69 3189.88 3191.63  
3192.62 3196.23 3196.58 3198.61 3198.98 3199.21  
3201.82 3204.37 3204.69 3206.09 3206.89 3209.60  
3210.14 3212.56 3213.51 3214.09 3214.36 3215.03  
3216.81 3217.66 3247.07

=====

11B

=====

4.67 13.17 20.32 24.87 26.22 34.73  
38.23 44.35 47.67 50.01 53.96 57.31  
61.10 63.23 67.78 72.53 75.74 80.17  
83.44 88.01 91.36 96.82 99.47 106.18

122.71 135.54 142.03 151.45 159.07 171.58  
175.24 191.25 198.57 201.10 204.17 213.95  
220.98 224.80 227.98 236.46 242.90 246.17  
247.60 261.20 266.03 272.15 274.18 282.81  
290.99 304.06 327.58 338.94 348.95 394.95  
400.66 407.76 410.83 412.59 414.15 417.65  
419.98 420.79 428.27 451.37 458.26 463.10  
467.86 501.45 508.78 510.04 512.92 520.74  
532.71 540.55 566.16 588.57 626.32 626.61  
627.35 628.81 630.19 630.57 630.99 658.27  
693.62 694.69 695.96 708.59 709.36 710.14  
711.69 713.56 714.64 717.44 720.52 721.48  
722.19 762.40 763.33 765.06 765.75 766.34  
769.85 770.98 781.01 784.82 813.53 863.48  
864.74 866.48 868.47 869.39 876.54 879.50  
903.16 942.87 944.49 945.41 947.29 947.72  
954.98 960.10 967.70 976.60 984.79 987.28  
988.06 988.78 995.12 1002.06 1009.68 1012.47  
1012.70 1013.18 1013.61 1013.97 1015.05 1015.88  
1016.14 1016.79 1018.13 1019.31 1022.07 1028.65  
1037.10 1045.98 1051.17 1052.03 1052.19 1052.87  
1053.20 1060.99 1090.85 1094.85 1101.52 1111.13  
1113.95 1114.71 1115.15 1115.46 1117.24 1118.06  
1118.28 1118.93 1119.87 1120.35 1121.45 1132.75  
1176.69 1200.94 1201.40 1201.80 1202.11 1202.27  
1202.36 1204.80 1207.32 1213.54 1222.47 1223.05  
1225.78 1226.75 1227.85 1229.24 1231.74 1255.17  
1266.40 1289.31 1324.35 1324.69 1329.18 1331.66  
1333.60 1334.19 1334.95 1349.18 1357.28 1364.28  
1367.35 1367.80 1368.67 1370.03 1372.85 1395.72  
1409.87 1412.64 1472.54 1472.94 1475.71 1477.07  
1478.45 1478.83 1481.30 1483.54 1494.29 1496.28  
1501.28 1505.39 1509.20 1524.28 1526.32 1526.63  
1527.35 1527.47 1528.23 1528.46 1622.69 1624.15  
1625.37 1626.52 1627.88 1628.41 1630.67 1641.77  
1642.61 1644.35 1644.55 1644.69 1645.39 1680.19  
1715.72 2946.50 2953.68 3013.07 3027.94 3034.53  
3040.54 3071.86 3075.86 3079.15 3088.27 3110.06  
3160.29 3168.50 3184.03 3185.24 3185.57 3186.29  
3187.26 3188.09 3190.10 3192.45 3192.55 3194.47  
3194.57 3194.93 3196.42 3200.44 3201.19 3205.32  
3206.06 3207.61 3208.08 3208.33 3209.95 3211.02  
3212.78 3213.51 3214.17 3214.91 3215.86 3216.25  
3217.53 3218.43 3227.38

=====

9A-TS

=====

-307.08 11.88 17.97 28.69 36.22 39.63  
48.58 50.23 53.13 56.58 61.70 62.73  
63.47 70.84 74.12 77.75 81.92 83.69  
88.81 95.17 96.90 105.53 106.50 112.74  
121.22 126.99 131.41 139.67 146.66 159.64  
164.39 169.27 193.00 201.02 209.80 216.88  
217.69 222.93 227.13 234.76 237.03 240.23  
257.63 259.12 260.99 262.94 270.87 276.48  
280.66 293.76 303.42 337.18 358.92 401.31  
408.13 409.89 412.71 419.88 423.17 427.04  
430.30 432.92 440.31 444.89 456.78 467.08  
469.90 475.98 490.22 503.64 508.52 518.02  
527.35 532.71 538.67 547.08 560.63 627.59  
627.82 629.15 629.84 630.85 632.28 633.20

693.60 698.02 701.59 705.31 707.24 707.82  
709.60 712.44 714.15 716.50 718.12 720.92  
723.72 725.15 748.50 761.33 763.67 766.79  
769.03 770.40 772.96 803.17 813.82 864.80  
867.92 871.43 873.96 880.67 886.92 890.08  
920.28 942.80 943.95 947.37 950.15 953.74  
956.24 962.40 970.20 985.44 985.85 991.23  
994.00 996.05 1001.42 1005.66 1007.23 1010.17  
1012.26 1012.78 1013.56 1014.05 1014.66 1015.47  
1016.41 1016.78 1018.81 1019.18 1020.80 1026.03  
1037.28 1050.29 1050.85 1053.11 1053.25 1053.71  
1054.63 1055.02 1075.96 1084.60 1107.62 1108.99  
1109.78 1110.94 1111.55 1116.54 1117.21 1117.64  
1119.00 1119.34 1122.07 1123.09 1124.95 1133.94  
1155.25 1176.58 1179.98 1199.84 1200.65 1201.18  
1202.95 1203.35 1203.79 1217.30 1219.42 1220.95  
1222.33 1228.17 1231.42 1233.11 1233.91 1246.52  
1259.09 1293.16 1300.44 1320.58 1321.58 1323.78  
1328.01 1328.79 1335.28 1336.74 1341.05 1360.37  
1363.74 1366.47 1367.57 1370.22 1370.79 1375.05  
1409.00 1423.60 1473.29 1473.55 1474.56 1475.37  
1475.57 1480.10 1480.59 1481.01 1489.88 1492.55  
1495.27 1501.30 1502.98 1522.72 1523.84 1524.81  
1527.07 1528.11 1529.48 1531.19 1569.03 1624.64  
1625.84 1626.94 1627.09 1629.61 1630.29 1639.35  
1642.88 1643.62 1644.26 1644.87 1646.87 1647.30  
1769.83 2969.72 3032.36 3035.16 3045.70 3076.49  
3091.67 3092.27 3101.51 3126.38 3150.90 3166.18  
3169.10 3184.93 3185.36 3185.54 3185.78 3185.98  
3187.63 3188.02 3192.76 3192.84 3194.13 3194.44  
3194.51 3194.83 3200.01 3201.12 3201.49 3202.25  
3202.86 3203.25 3204.53 3207.55 3210.14 3211.31  
3211.74 3212.92 3213.78 3223.02 3226.67 3227.79  
3228.01 3229.64 3233.76

=====

9B-TS

=====

-301.01 2.49 22.90 28.27 34.18 45.69  
47.70 49.42 53.31 57.79 60.24 63.50  
67.41 71.00 72.39 76.26 79.04 79.60  
85.10 93.65 96.16 105.30 112.54 115.91  
119.10 129.15 130.58 135.76 141.44 162.51  
165.77 181.61 195.97 199.78 213.77 216.44  
221.23 224.49 229.54 237.78 239.32 257.35  
258.56 261.84 262.93 270.69 274.25 280.48  
287.87 311.27 316.70 327.51 368.21 384.14  
407.75 411.01 412.07 419.42 423.49 427.71  
429.96 431.71 432.59 440.75 447.14 461.16  
471.99 472.40 486.36 499.13 505.24 519.40  
528.17 534.84 544.26 562.32 590.77 616.08  
627.26 627.34 628.95 630.12 631.50 632.66  
676.09 693.75 697.63 705.98 707.90 710.17  
710.70 712.36 714.99 715.79 716.89 720.35  
722.92 723.72 736.91 759.60 762.10 766.82  
768.96 771.50 773.76 781.08 804.44 845.58  
862.25 865.12 870.44 870.81 880.24 885.32  
930.29 940.64 944.40 949.14 951.06 955.42  
960.33 966.47 974.82 985.32 990.22 990.71  
991.24 993.80 998.91 1000.77 1004.52 1011.03  
1012.02 1012.65 1013.90 1014.20 1015.05 1015.50  
1017.72 1018.34 1019.30 1021.20 1026.30 1026.72

1030.69 1048.58 1049.73 1050.39 1050.72 1053.63  
1054.15 1069.61 1085.54 1095.60 1107.15 1107.83  
1108.78 1113.80 1114.66 1116.32 1116.87 1117.79  
1118.60 1119.29 1120.56 1121.71 1123.89 1138.14  
1161.34 1178.16 1180.19 1185.51 1200.09 1200.31  
1201.77 1201.96 1203.77 1203.90 1218.75 1220.10  
1221.66 1226.90 1227.24 1228.86 1230.88 1234.69  
1257.33 1284.18 1292.67 1318.65 1320.58 1322.94  
1326.57 1329.67 1334.91 1335.69 1341.08 1359.49  
1362.61 1366.82 1367.34 1368.29 1370.07 1371.29  
1410.62 1418.60 1460.33 1467.89 1473.02 1473.99  
1474.17 1476.41 1479.52 1479.73 1480.80 1483.34  
1495.88 1501.38 1503.91 1522.35 1524.10 1524.67  
1526.42 1526.91 1527.32 1529.86 1550.93 1617.19  
1623.81 1624.58 1626.64 1626.99 1629.20 1630.09  
1641.79 1642.25 1644.24 1644.94 1646.27 1646.98  
1771.68 2965.98 3041.29 3042.51 3056.71 3063.90  
3098.55 3107.95 3116.97 3124.71 3145.55 3161.05  
3177.68 3178.35 3181.36 3184.89 3185.52 3186.08  
3187.34 3187.65 3187.73 3191.79 3194.25 3194.31  
3194.64 3195.04 3196.86 3200.72 3202.62 3203.07  
3207.03 3207.56 3207.80 3211.09 3211.15 3213.61  
3214.12 3214.40 3217.43 3218.61 3227.36 3228.17  
3230.21 3239.84 3251.86

=====  
11A-TS  
=====

-139.15 11.07 17.48 27.26 32.95 37.53  
42.12 48.08 51.22 56.39 58.09 61.90  
63.23 66.97 69.91 77.75 79.05 81.62  
90.37 99.02 102.24 104.40 109.48 111.74  
118.53 122.55 127.95 134.88 148.27 159.03  
165.51 177.39 179.12 188.93 196.08 206.90  
217.21 220.89 224.79 230.66 241.55 242.64  
248.66 254.46 258.57 263.35 265.16 279.64  
280.81 283.63 302.09 325.65 356.51 383.07  
404.83 405.75 413.42 417.43 421.82 424.13  
429.39 431.41 434.50 439.03 445.62 462.88  
470.41 488.19 503.22 504.23 520.20 522.85  
531.40 537.72 561.55 617.67 624.49 628.78  
630.69 630.74 631.59 632.01 632.76 638.09  
682.51 696.99 698.12 699.95 705.70 708.72  
712.42 712.84 714.45 715.21 715.90 720.99  
722.67 728.82 760.19 762.35 767.14 767.93  
770.54 771.25 772.20 783.30 820.91 836.87  
862.32 864.20 868.84 872.34 877.29 887.67  
908.92 937.14 938.26 942.42 946.93 951.05  
960.48 963.01 969.63 971.13 983.10 986.15  
990.18 992.28 995.67 999.31 1008.48 1012.22  
1013.67 1014.05 1014.08 1014.73 1015.26 1015.99  
1016.18 1016.95 1017.59 1020.11 1022.55 1025.81  
1050.51 1050.82 1052.61 1053.03 1053.53 1054.25  
1055.68 1081.03 1096.52 1102.76 1111.52 1112.06  
1113.18 1113.78 1115.30 1116.95 1118.43 1119.13  
1121.51 1121.67 1122.33 1123.51 1125.35 1128.24  
1140.05 1181.73 1200.81 1201.35 1202.14 1202.23  
1202.95 1203.08 1204.08 1217.06 1223.08 1226.36  
1226.82 1227.41 1229.44 1233.71 1234.75 1244.48  
1265.70 1290.76 1300.63 1320.16 1324.23 1330.79  
1331.03 1335.35 1335.59 1336.35 1345.27 1357.59  
1362.07 1364.63 1366.45 1366.88 1367.73 1368.60

1378.19 1405.85 1445.88 1459.47 1472.69 1475.00  
1476.58 1477.54 1478.05 1480.64 1481.68 1482.69  
1495.34 1501.95 1504.67 1505.08 1524.76 1526.19  
1527.13 1527.32 1527.74 1528.89 1531.47 1624.58  
1626.89 1627.35 1628.21 1629.95 1630.10 1642.68  
1644.03 1644.69 1644.83 1645.77 1647.60 1677.03  
1713.65 2964.19 2970.16 3016.19 3023.85 3030.59  
3070.37 3090.67 3103.20 3120.98 3123.85 3125.03  
3157.77 3177.80 3182.39 3184.49 3185.09 3185.68  
3185.97 3186.57 3187.69 3188.17 3191.74 3193.90  
3194.31 3195.05 3195.50 3197.42 3200.41 3202.94  
3203.23 3204.64 3205.90 3207.22 3209.87 3211.02  
3211.45 3211.82 3213.09 3217.33 3218.52 3218.72  
3220.28 3225.08 3228.60

=====  
11B-TS  
=====

-235.68 13.53 17.54 20.66 26.07 30.10  
42.16 45.28 47.98 51.36 54.05 55.70  
58.25 62.32 62.89 68.39 69.95 71.91  
82.82 86.66 89.96 92.51 100.35 105.62  
110.15 113.99 122.86 124.03 125.21 146.99  
150.41 164.88 175.24 201.29 205.26 207.27  
217.09 226.18 234.32 235.97 240.92 248.43  
250.99 262.09 263.35 264.87 270.17 275.18  
277.11 280.53 299.14 318.64 327.29 403.32  
408.61 409.94 413.99 415.24 418.68 421.31  
423.32 426.57 434.23 451.13 454.07 462.08  
468.69 493.62 500.54 508.06 514.55 523.64  
534.69 545.13 553.78 580.28 620.60 627.75  
628.09 628.83 630.39 631.08 633.10 662.26  
687.96 694.38 699.36 708.03 709.56 711.42  
712.37 714.01 714.99 715.46 720.60 721.98  
724.96 729.00 761.52 764.29 767.47 768.27  
772.12 772.90 773.83 788.87 855.91 862.29  
868.10 874.24 875.72 877.08 879.29 882.61  
911.08 928.15 939.23 944.55 946.56 953.79  
955.42 959.00 961.72 968.45 985.08 989.97  
995.83 996.84 1000.90 1001.90 1011.33 1011.56  
1011.97 1012.92 1014.81 1015.31 1015.89 1016.32  
1017.47 1018.30 1018.67 1018.86 1021.56 1024.45  
1045.68 1050.25 1051.07 1051.94 1052.51 1053.84  
1055.80 1057.24 1074.13 1080.91 1103.61 1111.01  
1112.40 1112.57 1114.02 1116.32 1117.50 1117.80  
1118.96 1119.45 1120.48 1122.54 1123.69 1124.55  
1175.05 1186.49 1199.25 1200.29 1200.63 1201.65  
1202.22 1202.93 1205.05 1210.82 1220.40 1222.54  
1223.97 1226.72 1228.48 1229.72 1235.78 1235.85  
1259.57 1271.28 1285.67 1323.13 1326.22 1327.85  
1328.37 1329.40 1335.28 1337.26 1338.47 1362.86  
1363.20 1365.99 1366.97 1371.45 1378.37 1381.32  
1396.30 1425.28 1471.62 1474.04 1474.37 1475.37  
1475.87 1478.26 1480.07 1481.06 1486.82 1495.31  
1500.86 1503.88 1507.71 1522.02 1522.56 1523.92  
1524.36 1525.56 1527.46 1531.52 1623.64 1624.42  
1625.07 1626.55 1628.89 1630.39 1634.74 1640.71  
1641.52 1642.99 1644.89 1645.64 1647.10 1669.66  
1771.27 2931.23 2973.20 2990.61 3007.87 3033.36  
3049.83 3072.07 3085.73 3116.10 3124.91 3157.49  
3158.19 3174.11 3183.20 3185.17 3185.70 3185.83  
3186.93 3187.50 3188.05 3193.07 3193.61 3194.13

3195.05 3196.36 3196.97 3202.45 3204.94 3205.68  
3206.03 3206.25 3206.41 3211.30 3211.95 3212.61  
3212.88 3213.21 3213.29 3214.21 3223.73 3227.53  
3228.19 3230.00 3232.33

=====

10

=====

9.44 26.47 27.45 37.11 40.95 43.63  
49.56 53.44 55.97 56.95 60.66 63.90  
68.36 70.81 76.84 77.46 83.78 89.25  
97.51 102.94 106.49 108.97 111.64 120.78  
126.95 143.16 146.71 154.36 163.61 170.50  
178.53 189.20 197.25 203.43 207.16 210.23  
220.19 228.11 239.48 242.35 247.13 253.38  
257.31 262.34 266.15 271.53 280.51 288.51  
314.43 327.56 354.31 367.87 408.16 411.17  
413.52 415.08 416.93 419.24 422.47 425.07  
433.23 441.14 445.25 451.64 459.17 465.44  
477.91 495.24 505.18 513.69 517.44 521.16  
534.96 540.22 552.44 606.44 626.77 629.04  
629.53 630.82 631.59 633.07 633.37 662.16  
693.58 698.37 708.91 709.12 711.09 713.09  
715.68 716.55 717.19 717.91 718.54 721.77  
722.47 762.27 762.98 766.94 769.00 770.46  
773.98 790.24 802.19 812.26 863.96 867.41  
874.19 877.18 878.95 879.98 887.59 921.33  
933.35 943.16 946.52 954.00 954.13 955.03  
957.55 958.04 979.55 986.74 990.30 995.78  
997.08 999.74 999.84 1003.38 1012.57 1013.39  
1014.09 1014.37 1014.96 1016.26 1017.51 1017.56  
1018.04 1019.09 1019.81 1020.92 1032.26 1050.94  
1051.02 1051.95 1052.95 1053.56 1054.25 1055.55  
1073.65 1079.14 1108.61 1111.68 1112.65 1114.30  
1114.91 1116.02 1116.07 1117.24 1117.48 1118.50  
1119.56 1120.33 1120.79 1123.31 1129.63 1176.16  
1176.51 1196.27 1198.59 1200.43 1202.48 1202.81  
1202.88 1203.59 1216.27 1223.22 1224.50 1226.34  
1227.10 1228.36 1230.60 1232.62 1236.92 1256.48  
1294.55 1305.38 1320.35 1323.56 1325.30 1327.63  
1328.83 1329.87 1332.68 1335.57 1346.81 1361.05  
1363.86 1365.98 1367.49 1371.45 1372.86 1397.86  
1414.07 1421.10 1423.09 1472.66 1473.79 1475.60  
1476.18 1479.30 1479.82 1481.63 1484.40 1493.83  
1495.03 1504.08 1505.95 1510.63 1519.20 1524.64  
1525.72 1526.48 1526.74 1528.97 1530.11 1540.01  
1624.34 1625.33 1626.90 1627.76 1628.73 1629.72  
1641.30 1642.74 1643.92 1645.09 1645.84 1646.71  
1756.66 2987.34 3005.37 3041.67 3056.08 3062.93  
3069.60 3107.42 3116.15 3120.40 3127.40 3149.94  
3156.42 3178.29 3183.52 3185.46 3186.09 3186.43  
3186.54 3186.57 3188.29 3192.31 3193.97 3194.15  
3196.24 3196.42 3198.41 3200.63 3202.68 3202.96  
3205.63 3207.69 3209.73 3210.04 3212.22 3213.02  
3213.33 3213.71 3218.62 3222.21 3223.11 3236.72  
3244.23 3246.09 3263.31

=====

12

=====

4.74 21.73 25.58 36.33 40.20 48.35  
50.05 52.85 54.94 58.08 60.14 63.20  
66.25 73.97 77.21 83.46 84.92 88.73

93.87 100.67 106.16 109.84 115.15 118.25  
125.29 138.54 139.68 148.28 152.75 163.26  
167.33 176.67 196.08 200.33 206.44 212.28  
221.36 229.99 232.36 238.12 242.91 253.12  
259.31 262.05 266.49 280.45 282.00 288.82  
292.54 307.81 324.58 353.49 381.00 408.28  
412.38 416.73 421.31 425.36 427.37 428.35  
432.69 435.22 436.85 443.41 464.67 469.05  
474.23 487.63 502.70 508.65 517.59 522.64  
531.93 540.79 571.68 588.04 628.25 629.09  
629.64 630.75 632.32 632.70 633.29 687.54  
694.17 696.70 705.99 708.62 710.81 712.81  
715.78 717.75 718.74 720.83 723.93 729.49  
732.85 760.85 765.27 767.41 771.01 772.06  
772.42 779.11 789.50 824.96 865.55 870.37  
874.07 880.43 882.99 886.25 896.21 911.46  
926.05 942.14 946.36 950.14 953.53 958.58  
964.06 966.03 985.23 988.15 992.96 993.90  
999.06 1003.64 1005.01 1006.55 1012.27 1012.90  
1013.12 1013.35 1014.42 1014.51 1016.12 1016.53  
1018.42 1020.42 1021.58 1028.12 1029.56 1044.04  
1047.53 1050.91 1052.67 1053.05 1053.25 1054.19  
1077.13 1090.84 1107.48 1109.36 1110.57 1112.67  
1114.32 1115.48 1115.86 1116.98 1118.10 1118.56  
1120.91 1121.55 1122.88 1124.93 1164.50 1177.45  
1183.84 1199.39 1199.79 1200.79 1201.12 1201.34  
1202.96 1209.35 1215.69 1222.62 1224.28 1225.65  
1227.63 1231.70 1234.55 1239.17 1241.68 1248.48  
1281.82 1308.75 1315.75 1323.81 1324.25 1327.81  
1329.86 1332.60 1337.54 1345.11 1361.76 1365.12  
1365.59 1367.94 1370.56 1371.30 1372.68 1380.26  
1412.79 1428.19 1469.92 1472.98 1473.87 1476.39  
1477.25 1479.43 1479.79 1482.36 1492.87 1494.21  
1497.26 1502.71 1509.49 1523.34 1525.62 1526.26  
1526.61 1527.05 1528.43 1531.34 1539.50 1572.66  
1622.26 1624.07 1625.53 1626.24 1626.85 1629.30  
1642.08 1642.50 1643.25 1643.51 1644.13 1644.46  
1791.54 2992.26 3031.41 3038.79 3044.71 3052.01  
3066.52 3088.79 3108.76 3112.83 3126.86 3150.14  
3168.88 3178.22 3184.30 3185.24 3185.83 3186.09  
3187.86 3188.53 3189.83 3191.99 3194.17 3196.33  
3196.43 3197.07 3198.52 3200.60 3206.74 3207.51  
3208.14 3209.97 3209.99 3211.20 3213.26 3214.09  
3215.41 3216.70 3218.49 3220.72 3229.04 3231.21  
3235.40 3255.65 3261.75

=====

13

=====

12.25 21.33 23.69 27.35 32.71 35.72  
38.25 40.88 44.58 47.47 49.57 50.20  
52.58 53.41 55.03 58.82 59.54 66.54  
70.10 72.70 76.33 80.23 82.86 87.92  
90.96 96.05 104.55 106.99 116.56 138.46  
142.01 144.91 146.63 161.84 163.17 165.90  
172.19 175.36 179.68 181.71 189.02 192.63  
194.47 199.37 205.38 208.81 214.40 218.47  
224.08 228.77 230.96 237.83 244.19 245.75  
256.60 263.40 265.55 280.67 283.02 286.93  
296.56 297.63 299.70 316.78 325.24 330.85  
343.68 353.90 381.28 397.80 403.62 415.31  
418.16 419.86 425.88 430.03 448.12 453.31

461.00 464.26 469.38 476.05 487.75 497.33  
502.44 514.24 517.99 519.77 520.90 524.23  
525.58 528.53 531.03 531.96 533.43 536.47  
542.87 544.98 547.96 552.98 555.63 559.82  
562.45 567.38 573.12 576.42 596.95 607.89  
616.17 635.83 654.67 678.12 682.02 689.87  
702.52 711.25 713.45 714.14 716.79 718.28  
729.08 765.58 768.70 790.26 806.25 814.38  
835.07 838.91 850.20 853.16 861.43 867.38  
869.96 870.91 873.96 876.84 883.54 884.41  
888.11 889.84 894.27 899.40 903.72 916.20  
920.63 925.77 931.83 934.90 937.14 940.37  
943.28 945.46 957.12 958.88 962.83 964.16  
966.22 966.92 967.55 970.21 973.26 987.36  
990.59 1003.79 1007.23 1010.14 1011.29 1011.93  
1014.11 1014.52 1022.15 1022.60 1024.48 1025.35  
1035.02 1046.02 1046.54 1047.61 1048.94 1057.88  
1059.58 1063.25 1065.90 1066.30 1067.09 1067.28  
1067.34 1068.42 1069.12 1075.64 1099.22 1140.47  
1155.11 1160.60 1161.01 1163.93 1166.96 1174.61  
1189.40 1190.14 1201.58 1203.10 1203.60 1204.31  
1207.28 1208.71 1216.90 1242.40 1249.57 1259.45  
1262.57 1283.07 1287.35 1289.13 1290.44 1294.94  
1300.64 1306.40 1312.03 1318.82 1319.10 1321.00  
1329.46 1339.18 1344.59 1357.31 1359.81 1360.39  
1366.25 1367.74 1390.26 1391.19 1410.01 1411.19  
1425.20 1426.35 1427.72 1429.02 1429.54 1431.13  
1431.42 1431.66 1432.93 1453.55 1454.90 1457.85  
1459.37 1462.36 1463.74 1464.32 1464.77 1466.25  
1466.74 1467.47 1491.97 1497.01 1497.66 1497.95  
1498.48 1498.87 1500.54 1501.17 1501.24 1501.99  
1502.08 1502.23 1509.83 1510.39 1511.88 1512.83  
1518.57 1520.64 1521.11 1522.21 1551.84 1552.54  
1601.96 1606.89 1607.49 1634.02 1634.91 1636.42  
1636.73 1641.44 1643.01 1648.06 1649.06 1650.39  
1651.98 1673.92 1674.37 2058.08 2993.45 3035.64  
3036.16 3037.17 3037.42 3038.50 3041.26 3041.31  
3043.70 3046.85 3088.70 3089.12 3097.00 3097.73  
3099.39 3099.56 3100.80 3100.95 3101.99 3111.45  
3121.20 3125.48 3127.06 3128.57 3129.50 3129.50  
3131.56 3144.09 3151.19 3152.36 3156.60 3166.33  
3169.91 3170.16 3173.24 3176.27 3177.73 3178.28  
3181.58 3182.42 3184.13 3186.29 3188.09 3192.61  
3193.43 3204.30 3205.17 3206.58 3217.87 3217.89  
3224.38 3228.59 3243.57 3243.82 3243.91 3398.26

=====  
13-TS

=====  
-299.10 9.31 16.92 22.63 26.30 29.60  
32.95 36.22 41.48 43.38 46.42 47.88  
49.13 52.34 56.14 59.03 61.05 61.96  
64.38 64.73 68.79 69.66 75.04 75.91  
81.43 90.52 100.13 102.07 106.97 111.69  
114.91 142.38 146.92 151.92 156.68 166.78  
170.06 174.28 176.17 185.17 188.90 189.92  
196.32 197.76 201.65 209.49 220.12 222.40  
223.01 232.62 234.31 237.66 243.31 248.31  
253.07 253.78 280.81 283.54 287.68 294.79  
297.01 307.70 321.84 325.55 326.48 342.71  
357.10 402.79 405.64 414.96 421.98 429.24  
434.99 443.51 452.40 460.52 464.05 468.90

483.85 487.56 494.26 496.03 499.67 502.05  
515.22 517.18 517.95 521.74 522.91 523.98  
526.83 528.35 531.27 532.08 534.87 538.52  
542.74 543.73 548.14 552.29 554.02 558.13  
563.70 570.07 573.16 593.64 599.59 617.84  
629.97 654.74 660.88 681.25 686.54 703.76  
703.95 709.72 710.40 711.30 754.35 766.71  
767.07 784.81 785.79 803.35 806.12 838.95  
839.93 845.77 849.82 857.48 864.08 867.99  
870.85 872.60 876.59 877.52 880.54 882.21  
889.92 892.38 899.82 907.33 910.00 918.50  
918.80 931.49 936.34 938.62 942.03 942.50  
951.88 955.83 962.01 962.84 965.15 970.21  
971.51 975.05 980.72 986.68 987.25 987.80  
994.25 998.04 1005.33 1005.48 1006.00 1007.17  
1009.59 1019.02 1022.74 1022.92 1023.54 1024.02  
1044.67 1045.44 1046.22 1048.78 1055.90 1058.04  
1064.44 1064.67 1065.11 1065.58 1066.00 1066.36  
1066.83 1067.39 1074.95 1083.14 1128.63 1140.34  
1149.86 1158.84 1159.86 1162.59 1165.37 1167.59  
1175.65 1188.59 1192.78 1200.22 1203.79 1203.97  
1206.65 1207.30 1208.20 1213.23 1240.15 1243.02  
1257.24 1257.44 1277.62 1285.21 1288.90 1291.00  
1294.64 1301.52 1307.17 1319.07 1320.16 1323.12  
1325.05 1333.52 1347.06 1352.42 1360.44 1361.21  
1362.23 1362.62 1364.53 1386.37 1407.70 1409.54  
1412.07 1422.84 1424.36 1425.48 1426.85 1428.69  
1428.72 1430.75 1430.97 1431.12 1454.82 1454.98  
1460.32 1461.63 1463.41 1463.67 1464.68 1465.05  
1465.75 1465.99 1483.56 1492.28 1496.24 1497.17  
1498.31 1499.40 1499.75 1500.32 1501.37 1501.64  
1501.99 1502.48 1507.62 1508.99 1510.22 1510.57  
1511.28 1516.08 1517.54 1518.96 1520.44 1552.59  
1553.32 1602.84 1603.09 1633.08 1633.68 1635.26  
1635.95 1638.12 1640.01 1647.69 1649.12 1649.62  
1651.81 1674.16 1675.30 1746.54 2976.80 2981.69  
3038.06 3040.72 3041.06 3041.10 3041.35 3042.12  
3043.69 3043.77 3100.62 3102.51 3102.70 3102.94  
3103.41 3104.73 3104.94 3106.42 3107.22 3111.55  
3115.22 3123.00 3126.23 3128.80 3128.98 3129.28  
3130.28 3130.32 3131.70 3150.31 3166.04 3167.18  
3168.60 3169.55 3170.63 3171.79 3175.04 3175.34  
3178.63 3181.40 3182.18 3185.35 3189.19 3190.44  
3193.89 3199.81 3201.41 3205.67 3205.69 3206.84  
3215.80 3225.18 3225.44 3225.88 3230.66 3272.48

=====  
14

=====  
12.94 16.98 18.72 22.94 23.62 28.47  
31.82 34.04 34.76 36.35 39.42 43.20  
43.25 44.21 47.72 50.65 60.34 64.77  
66.66 67.70 69.33 73.20 78.81 80.82  
86.94 88.33 94.93 96.65 108.91 123.34  
139.99 144.69 149.28 158.35 162.67 167.25  
175.12 176.12 188.51 189.80 191.97 193.67  
195.81 198.81 212.77 217.14 221.87 222.93  
227.65 229.08 233.86 236.89 243.00 251.07  
252.65 258.60 280.32 284.57 286.92 294.12  
295.37 312.64 318.22 323.60 342.42 347.10  
397.39 400.98 413.33 416.62 428.78 448.02  
450.03 454.91 469.82 474.23 475.41 484.39

492.90 498.03 515.55 518.78 519.67 520.48  
521.25 524.00 524.98 527.26 529.90 532.59  
534.74 540.91 543.58 546.21 547.57 553.02  
554.54 557.72 562.81 567.98 570.13 574.25  
584.10 598.18 615.60 620.89 635.10 636.59  
661.49 673.60 681.72 689.64 701.00 706.91  
708.79 710.25 713.67 753.78 767.99 769.03  
790.72 801.54 804.53 814.93 834.71 837.55  
842.58 854.01 856.16 864.34 865.28 866.85  
870.18 871.28 875.23 877.09 878.05 878.75  
891.70 894.80 903.02 910.00 912.37 914.46  
930.68 932.41 937.40 939.06 945.95 957.54  
963.69 964.41 967.15 969.15 973.60 977.27  
980.20 989.70 991.60 1004.67 1006.94 1009.46  
1009.87 1011.82 1012.56 1014.18 1015.38 1020.88  
1022.36 1024.04 1026.15 1044.86 1046.49 1046.57  
1047.00 1057.32 1059.27 1060.87 1064.37 1065.25  
1065.75 1066.81 1066.99 1068.17 1068.80 1068.89  
1072.20 1076.53 1110.17 1130.71 1149.62 1154.75  
1157.18 1159.95 1160.74 1162.83 1166.09 1175.65  
1189.31 1201.59 1202.41 1204.79 1206.65 1207.07  
1208.99 1209.33 1215.62 1222.91 1241.87 1251.52  
1257.69 1259.51 1277.52 1285.44 1286.35 1287.62  
1291.51 1295.37 1300.87 1321.88 1323.81 1324.31  
1327.35 1327.92 1337.19 1342.68 1343.91 1360.94  
1363.50 1366.22 1367.43 1392.12 1392.58 1409.36  
1411.17 1427.22 1427.99 1428.75 1429.10 1430.34  
1430.37 1431.01 1431.41 1432.09 1456.75 1457.82  
1458.91 1460.93 1462.45 1463.72 1464.65 1465.07  
1465.28 1466.85 1469.30 1494.79 1495.10 1495.67  
1496.54 1496.78 1498.03 1499.05 1499.75 1500.88  
1504.53 1505.11 1509.81 1511.52 1511.54 1512.29  
1520.28 1520.33 1520.62 1522.88 1526.88 1548.80  
1551.89 1595.19 1606.56 1634.41 1634.81 1635.35  
1636.99 1641.66 1643.21 1643.47 1649.76 1650.34  
1651.32 1652.48 1672.68 1673.83 2967.10 2992.83  
3001.92 3011.85 3039.48 3040.22 3040.58 3040.93  
3041.86 3042.06 3043.44 3044.94 3059.68 3097.39  
3098.67 3100.13 3101.15 3102.13 3102.58 3106.34  
3106.39 3107.37 3117.87 3124.22 3127.06 3129.37  
3130.30 3130.81 3131.72 3133.42 3135.60 3147.83  
3149.93 3171.40 3172.03 3172.61 3173.03 3179.92  
3184.04 3184.64 3186.85 3188.16 3188.88 3190.01  
3193.18 3193.85 3197.75 3198.84 3208.64 3209.74  
3213.94 3216.24 3218.79 3224.26 3230.11 3231.70

=====  
15A

=====  
10.44 17.54 23.17 25.13 29.63 33.29  
34.57 37.66 38.77 41.53 45.80 46.23  
49.86 51.73 53.84 56.90 59.33 61.66  
63.92 69.42 73.28 75.21 82.37 85.53  
86.29 92.90 96.53 102.39 103.94 107.88  
112.12 117.80 122.30 131.80 133.96 143.39  
150.25 153.61 155.51 159.01 162.89 166.39  
172.30 179.51 182.93 184.84 188.61 193.21  
196.23 199.82 202.42 207.54 211.21 221.90  
223.95 229.59 233.57 235.26 242.06 247.08  
249.45 251.11 259.96 264.91 270.45 274.91  
276.82 282.25 288.29 290.83 292.66 302.84  
309.54 314.30 327.08 335.06 341.79 345.25

389.35 391.90 400.68 412.75 418.87 427.62  
444.21 446.85 453.11 458.16 465.15 486.15  
488.48 491.99 497.69 511.62 516.13 518.00  
519.56 520.71 523.42 524.91 526.92 528.19  
530.50 533.71 534.98 536.87 540.00 542.37  
545.91 550.89 554.42 556.94 559.63 561.34  
564.40 566.62 571.73 574.65 580.67 598.65  
619.27 620.07 631.11 633.99 658.07 677.34  
685.23 690.56 703.11 705.85 711.65 713.79  
719.48 753.59 761.99 768.76 771.47 788.00  
803.70 813.58 828.60 830.12 839.23 840.52  
842.49 854.57 860.29 861.70 864.66 865.05  
871.92 873.90 875.27 877.50 881.07 888.33  
891.29 894.92 900.43 907.32 909.30 930.20  
931.15 932.44 934.42 939.27 948.62 958.28  
963.21 965.79 966.50 969.01 970.09 971.48  
974.24 984.52 988.03 991.55 1003.58 1003.79  
1005.94 1012.09 1013.22 1016.32 1021.20 1022.50  
1024.23 1024.27 1028.65 1030.51 1032.72 1044.37  
1047.07 1052.49 1057.28 1058.25 1061.70 1064.64  
1065.56 1066.46 1066.62 1069.52 1069.70 1070.87  
1072.34 1073.67 1077.41 1088.82 1109.20 1118.73  
1136.52 1138.35 1153.32 1156.81 1159.17 1164.43  
1166.61 1167.56 1174.41 1174.72 1175.47 1188.97  
1200.30 1203.57 1205.37 1205.56 1206.95 1208.81  
1210.13 1211.63 1216.05 1229.09 1245.59 1250.88  
1258.03 1260.77 1274.17 1284.18 1289.34 1290.42  
1290.79 1295.19 1301.60 1302.41 1318.05 1321.40  
1322.22 1326.35 1330.90 1348.68 1350.58 1351.03  
1358.68 1361.38 1362.81 1363.31 1389.60 1395.04  
1409.05 1409.86 1412.62 1427.49 1428.95 1429.88  
1430.42 1430.57 1431.33 1433.59 1435.63 1451.63  
1458.85 1461.24 1461.75 1464.44 1464.89 1466.15  
1467.30 1467.76 1472.37 1473.96 1477.51 1478.78  
1479.21 1485.66 1494.78 1496.75 1496.93 1497.43  
1498.57 1499.28 1499.65 1501.76 1502.01 1502.73  
1503.40 1507.91 1510.89 1513.26 1515.73 1517.04  
1520.56 1520.72 1523.05 1528.07 1531.95 1536.89  
1549.80 1551.36 1597.53 1603.52 1631.29 1634.16  
1635.76 1636.67 1638.16 1639.86 1647.95 1650.23  
1651.53 1651.88 1672.54 1674.97 1708.90 1786.28  
2165.29 2725.55 2800.78 2848.39 2970.48 2994.63  
3000.49 3001.42 3037.89 3038.73 3039.64 3041.05  
3042.32 3046.69 3047.33 3054.40 3056.57 3066.38  
3086.87 3089.29 3096.57 3099.63 3100.20 3100.84  
3105.43 3108.32 3112.39 3121.30 3124.47 3125.45  
3127.87 3128.73 3130.88 3130.91 3132.71 3148.03  
3165.63 3169.58 3169.86 3169.88 3175.84 3178.75  
3180.70 3180.87 3183.74 3186.79 3187.35 3188.90  
3191.54 3192.06 3193.17 3194.51 3198.20 3199.41  
3202.23 3206.81 3207.84 3217.60 3220.36 3225.58  
3230.63 3234.05 3234.53

=====  
15B

=====  
12.87 15.30 25.09 28.07 32.27 33.90  
37.49 39.12 40.49 41.89 47.29 48.26  
49.46 53.35 53.86 55.78 56.31 66.34  
69.44 72.05 73.00 75.01 80.23 91.27  
94.93 100.95 104.62 107.85 109.27 111.96  
113.97 118.24 120.02 122.65 132.61 138.55



140.45 144.90 149.13 151.46 155.26 162.24  
164.26 168.43 169.66 177.40 181.57 185.29  
190.48 191.12 196.31 197.92 199.68 209.80  
217.12 218.73 222.79 227.42 233.46 234.81  
239.86 240.54 249.37 252.57 264.37 269.96  
277.58 282.08 286.81 289.12 290.56 294.80  
300.68 303.87 316.88 322.16 336.19 344.22  
346.79 364.49 391.94 401.98 410.73 416.50  
433.56 441.47 448.22 452.36 459.49 466.72  
484.78 486.39 490.64 493.81 515.08 515.34  
516.00 518.27 521.16 522.87 523.93 525.71  
530.51 531.08 533.61 536.45 537.40 538.81  
543.26 545.42 547.60 553.10 556.24 559.87  
565.11 566.61 568.66 573.99 581.43 598.65  
617.30 618.75 627.86 638.95 659.13 677.82  
680.95 685.91 701.15 708.37 711.89 712.65  
716.04 750.58 767.60 768.72 775.03 787.18  
803.86 810.74 826.52 830.00 836.47 841.35  
849.42 851.12 853.28 859.94 861.28 863.68  
870.31 873.27 875.36 877.51 878.83 890.57  
891.31 892.54 894.77 912.57 916.33 930.71  
931.69 931.91 937.93 944.65 951.95 957.10  
961.91 966.82 968.39 969.88 971.85 972.38  
974.85 989.71 990.60 994.65 1007.57 1008.75  
1010.75 1012.47 1014.32 1015.86 1019.60 1023.95  
1024.39 1024.68 1026.09 1027.74 1028.73 1041.21  
1044.66 1047.44 1048.52 1055.79 1060.59 1061.24  
1064.52 1065.42 1066.17 1066.57 1067.17 1068.26  
1068.97 1069.09 1070.66 1075.36 1079.18 1089.27  
1123.34 1128.78 1148.33 1157.67 1161.63 1162.75  
1165.26 1169.66 1173.61 1174.05 1178.88 1187.73  
1201.15 1202.46 1203.86 1205.07 1207.68 1209.12  
1210.73 1214.77 1215.57 1229.86 1239.52 1249.61  
1254.43 1259.55 1282.27 1283.84 1290.67 1292.47  
1293.02 1296.14 1301.11 1302.43 1315.92 1318.31  
1324.25 1325.63 1331.46 1335.02 1337.99 1353.03  
1355.35 1361.14 1361.58 1371.58 1395.77 1397.74  
1403.06 1408.42 1411.43 1425.22 1427.75 1428.81  
1429.18 1430.28 1430.65 1431.22 1433.15 1434.95  
1454.17 1456.50 1459.10 1460.93 1462.78 1463.99  
1464.88 1465.58 1466.46 1470.65 1472.05 1481.12  
1482.94 1492.30 1493.48 1495.01 1495.07 1496.04  
1499.85 1500.15 1501.53 1501.70 1501.81 1503.74  
1504.07 1508.46 1508.84 1510.98 1511.94 1513.87  
1514.98 1519.50 1521.14 1521.71 1525.97 1529.14  
1546.38 1552.09 1593.87 1610.40 1631.65 1635.25  
1635.78 1637.05 1637.93 1646.37 1646.94 1649.35  
1649.96 1651.60 1667.95 1672.88 1708.20 1777.77  
2184.36 2970.81 2984.43 2999.58 3029.21 3036.83  
3036.89 3038.17 3041.73 3041.80 3042.42 3043.32  
3043.35 3050.93 3065.58 3088.28 3098.86 3100.51  
3100.72 3102.10 3102.13 3104.72 3104.79 3112.67  
3114.70 3118.52 3125.19 3127.13 3128.20 3128.79  
3130.01 3131.13 3133.50 3133.65 3138.67 3140.76  
3152.30 3167.61 3168.67 3170.48 3172.26 3174.05  
3176.41 3181.26 3182.16 3183.06 3185.76 3186.17  
3190.13 3193.00 3193.68 3194.92 3197.93 3208.37  
3211.15 3213.63 3214.31 3215.92 3220.11 3220.60  
3220.92 3231.37 3263.50

=====  
-271.77 11.92 15.47 25.52 26.33 28.74  
32.32 35.89 36.59 41.34 43.68 46.53  
48.40 50.16 53.83 54.34 55.29 58.22  
59.11 65.53 70.15 70.73 74.13 75.45  
83.93 89.55 93.10 104.91 107.23 108.27  
112.77 117.08 125.80 128.94 132.33 141.50  
144.53 152.97 157.92 161.95 164.58 166.86  
171.19 175.94 179.13 181.91 188.60 191.54  
194.09 195.72 200.56 208.46 214.52 218.15  
221.89 223.66 230.33 232.61 234.39 238.68  
242.20 249.04 252.69 256.05 264.72 270.34  
283.00 284.47 286.79 287.36 292.59 298.03  
301.82 306.25 310.62 323.71 334.54 345.37  
383.47 395.31 398.31 410.59 411.92 417.06  
436.27 442.78 446.37 447.86 459.11 466.49  
482.88 485.41 489.01 499.02 506.85 515.42  
517.42 519.32 520.33 522.70 525.23 527.22  
528.85 531.93 532.73 532.83 540.23 543.16  
545.59 553.18 556.36 557.70 560.10 563.30  
565.72 568.85 574.39 582.60 598.98 612.94  
619.73 628.10 638.42 654.55 680.00 681.81  
683.45 687.84 702.74 706.60 712.76 713.13  
718.90 763.44 768.11 769.51 780.53 788.68  
806.39 811.04 830.56 840.51 840.54 844.97  
852.97 856.60 861.80 862.94 865.36 870.78  
872.17 874.69 879.02 880.43 892.62 893.78  
895.36 897.31 905.45 909.58 917.04 917.12  
931.28 933.05 935.90 944.81 957.29 960.95  
963.25 964.87 967.71 968.85 971.57 972.47  
975.30 993.67 995.16 1004.52 1008.04 1008.93  
1010.75 1012.06 1012.50 1012.67 1013.79 1023.92  
1024.89 1025.56 1027.64 1032.00 1032.78 1042.13  
1046.49 1048.13 1051.24 1053.54 1056.15 1058.71  
1063.05 1064.07 1065.50 1066.19 1066.67 1067.47  
1067.90 1068.66 1069.47 1069.55 1075.67 1093.78  
1130.93 1144.86 1148.08 1159.18 1163.23 1163.42  
1167.34 1173.67 1174.47 1177.20 1179.89 1188.47  
1195.59 1201.80 1203.05 1204.61 1206.81 1207.78  
1208.27 1214.20 1215.25 1218.15 1239.98 1248.74  
1255.22 1257.72 1270.31 1288.41 1291.08 1291.21  
1294.42 1296.28 1301.51 1304.37 1316.44 1319.32  
1320.59 1325.82 1326.06 1336.21 1340.49 1350.04  
1355.18 1359.29 1362.62 1370.82 1396.73 1397.66  
1402.94 1404.58 1410.42 1426.07 1427.45 1428.81  
1429.03 1429.97 1430.19 1430.91 1431.14 1434.43  
1455.92 1458.11 1461.49 1461.98 1462.72 1464.10  
1464.94 1465.58 1467.73 1470.22 1473.86 1480.02  
1484.01 1493.88 1494.85 1496.02 1496.47 1497.63  
1498.75 1499.64 1499.86 1502.58 1502.68 1504.46  
1504.82 1508.02 1509.17 1510.58 1512.33 1513.45  
1513.87 1519.62 1521.33 1524.09 1525.47 1533.02  
1548.16 1552.23 1597.22 1611.00 1634.01 1635.34  
1637.29 1637.40 1641.72 1647.11 1647.61 1649.46  
1650.20 1651.08 1655.45 1670.79 1673.43 1775.98  
1934.40 2957.59 2989.38 3006.35 3037.39 3038.66  
3038.73 3040.52 3040.61 3040.73 3040.92 3041.39  
3042.10 3043.27 3068.02 3098.74 3100.13 3101.15  
3101.29 3101.72 3101.91 3103.45 3104.46 3110.78  
3111.76 3114.39 3124.21 3126.13 3128.54 3130.32  
3130.85 3131.05 3132.31 3133.23 3135.35 3154.17

=====  
15A-TS1

3162.74 3164.07 3164.65 3165.65 3167.32 3175.38  
3175.60 3178.64 3181.07 3181.62 3182.10 3183.46  
3184.59 3187.56 3191.93 3192.15 3197.94 3201.03  
3206.89 3207.83 3209.63 3218.17 3220.17 3220.31  
3224.16 3226.40 3232.67

=====

15A-TS2

=====

-175.94 14.56 21.32 24.37 29.92 31.45  
34.09 35.50 36.08 39.55 43.58 45.94  
50.07 52.92 54.45 57.29 62.04 63.20  
64.62 67.98 73.76 75.62 77.22 78.62  
82.08 90.67 93.76 95.43 99.68 100.82  
103.98 111.76 122.84 126.82 130.05 132.68  
135.34 139.01 142.46 144.79 155.05 160.62  
165.18 168.87 171.42 176.55 178.26 185.03  
189.09 191.44 196.50 202.14 204.26 209.75  
212.92 224.16 227.10 227.61 238.32 243.56  
246.24 248.68 252.16 254.45 258.70 265.06  
271.84 285.51 286.95 291.15 292.35 300.34  
315.94 322.98 327.65 340.53 343.52 357.40  
391.42 396.42 405.67 412.75 418.17 428.14  
433.58 436.40 439.99 444.90 450.05 458.95  
462.33 482.29 486.37 492.09 496.25 517.68  
518.92 520.88 521.62 522.26 523.38 527.35  
528.50 529.54 534.15 535.79 539.87 546.53  
548.75 553.54 554.73 556.80 559.10 564.20  
566.62 571.57 575.21 584.89 598.68 615.58  
621.04 637.06 658.29 661.59 671.82 686.30  
690.83 692.12 703.16 706.16 712.54 713.86  
717.06 736.26 755.39 765.59 768.50 790.78  
804.77 815.04 825.75 841.53 842.34 843.62  
851.37 856.25 861.16 863.38 866.40 870.97  
871.56 872.45 876.23 880.65 885.04 888.40  
892.12 894.87 901.25 908.01 914.52 920.93  
927.82 932.63 934.04 942.77 944.03 958.70  
960.59 963.23 965.68 966.03 969.90 969.95  
971.19 988.47 993.36 995.39 1004.40 1004.75  
1005.46 1011.75 1012.78 1013.43 1014.74 1023.06  
1023.71 1025.31 1025.84 1034.67 1040.48 1043.35  
1047.26 1048.06 1048.25 1049.48 1057.60 1060.71  
1063.03 1064.55 1064.97 1066.19 1066.45 1067.39  
1068.51 1069.38 1071.50 1073.71 1076.69 1079.19  
1110.19 1138.18 1156.43 1158.48 1162.57 1165.36  
1167.64 1170.22 1172.27 1174.24 1177.38 1188.11  
1197.53 1200.10 1204.92 1206.18 1206.36 1207.49  
1211.73 1214.11 1215.91 1219.51 1231.59 1241.91  
1256.98 1257.73 1260.72 1286.99 1289.03 1290.29  
1291.15 1291.71 1295.65 1301.80 1306.80 1318.07  
1323.32 1323.61 1328.70 1343.07 1347.65 1353.34  
1358.85 1363.59 1364.40 1368.61 1394.29 1400.02  
1403.75 1408.26 1410.31 1424.92 1426.40 1427.88  
1428.85 1430.03 1430.37 1431.09 1431.13 1432.33  
1453.66 1459.07 1461.95 1463.44 1464.42 1464.65  
1464.93 1465.82 1467.80 1468.92 1469.87 1476.33  
1478.16 1478.90 1492.08 1493.61 1496.47 1498.73  
1498.99 1499.64 1501.71 1502.13 1503.06 1503.23  
1505.34 1508.26 1510.31 1510.94 1513.13 1515.70  
1517.26 1519.73 1520.62 1522.27 1523.79 1532.29  
1550.80 1552.21 1604.56 1604.87 1634.87 1635.68  
1636.46 1638.70 1640.49 1642.98 1649.74 1650.60

1651.47 1652.97 1673.08 1673.74 1676.09 1775.26  
1896.86 2955.00 3000.72 3019.84 3027.93 3038.93  
3039.34 3040.79 3041.58 3041.62 3041.76 3043.28  
3045.93 3046.81 3054.28 3066.17 3099.95 3100.77  
3100.94 3101.66 3103.55 3105.02 3105.69 3106.21  
3111.70 3124.08 3124.56 3125.96 3128.23 3128.43  
3128.66 3129.03 3129.30 3133.24 3133.77 3150.96  
3150.97 3158.17 3166.42 3169.17 3170.83 3171.73  
3178.39 3179.77 3181.23 3182.08 3182.84 3183.50  
3183.55 3185.43 3189.89 3190.26 3191.27 3192.56  
3196.92 3205.89 3206.91 3207.48 3216.11 3225.81  
3229.13 3231.85 3237.73

=====

15B-TS1

=====

-319.48 10.62 16.13 18.92 23.34 28.11  
28.31 30.28 35.72 38.26 40.18 40.95  
42.53 47.17 47.28 48.81 51.12 54.90  
55.54 64.67 68.83 72.35 74.90 79.44  
81.40 83.35 90.17 94.06 96.46 100.21  
107.98 110.21 121.73 129.07 134.71 136.89  
139.30 145.77 148.44 153.26 155.67 158.31  
164.02 167.73 170.57 173.14 175.80 182.68  
187.24 188.92 196.87 201.27 202.51 205.68  
208.75 214.47 220.69 227.53 235.46 237.65  
241.45 246.67 251.08 254.17 258.35 267.14  
269.67 278.07 282.75 287.29 290.48 292.24  
301.34 309.20 319.88 326.55 329.88 344.29  
396.04 397.10 399.59 413.33 419.17 431.67  
444.08 446.84 448.32 449.86 456.57 464.20  
483.12 485.56 490.33 496.57 501.29 517.04  
519.14 520.13 520.53 524.79 526.37 526.94  
527.65 532.15 532.99 535.29 537.59 545.99  
549.38 553.43 556.28 559.69 561.00 563.76  
565.65 569.71 573.88 576.99 597.95 599.80  
620.26 623.23 634.21 649.91 657.55 676.91  
686.35 690.79 703.51 706.33 711.61 713.78  
716.70 757.66 762.38 768.00 771.05 789.83  
805.19 814.22 827.04 833.16 837.16 841.03  
853.79 858.43 863.38 864.74 866.74 872.79  
876.02 877.35 877.72 882.03 885.30 888.49  
894.38 895.97 902.42 906.27 911.83 924.17  
926.37 930.34 934.63 938.91 950.34 958.40  
961.05 964.13 965.26 968.08 968.25 971.81  
976.18 982.94 993.69 1002.82 1004.59 1006.22  
1009.49 1010.87 1013.20 1013.76 1014.15 1023.85  
1024.46 1024.85 1025.22 1026.47 1045.47 1046.91  
1048.17 1048.82 1049.49 1055.52 1057.85 1058.47  
1064.28 1064.50 1065.32 1066.16 1066.70 1067.07  
1069.26 1069.81 1070.49 1072.61 1078.71 1093.89  
1136.37 1136.94 1155.01 1157.43 1161.33 1165.27  
1168.50 1169.19 1172.40 1174.10 1176.09 1188.56  
1199.47 1203.16 1204.00 1204.41 1204.97 1206.56  
1209.95 1211.59 1214.05 1224.10 1244.27 1251.86  
1255.28 1258.19 1269.01 1287.74 1290.08 1292.45  
1292.75 1294.66 1301.43 1309.74 1317.06 1320.06  
1320.81 1326.96 1331.11 1349.92 1353.17 1354.50  
1357.56 1359.83 1364.23 1364.63 1390.35 1398.33  
1408.29 1409.56 1411.06 1425.72 1426.41 1429.21  
1429.73 1430.57 1430.90 1431.34 1432.20 1434.24  
1454.75 1460.23 1462.73 1463.22 1464.51 1464.76

1465.72 1465.86 1467.10 1467.20 1478.14 1480.20  
1484.13 1488.43 1491.81 1494.83 1495.67 1496.95  
1497.96 1498.66 1499.14 1501.94 1502.13 1503.74  
1505.46 1508.66 1509.41 1510.62 1511.50 1512.16  
1514.65 1520.67 1521.00 1521.21 1522.13 1531.07  
1548.30 1551.11 1598.47 1602.60 1635.37 1636.13  
1637.07 1637.38 1637.72 1638.74 1649.81 1650.14  
1650.88 1652.71 1653.03 1671.34 1672.00 1783.38  
1865.29 2961.56 2986.46 3007.70 3030.83 3035.96  
3038.55 3040.82 3041.10 3041.40 3041.84 3042.83  
3046.14 3060.98 3065.22 3095.32 3097.94 3098.81  
3100.34 3100.58 3102.06 3102.87 3104.22 3106.58  
3110.68 3111.42 3121.70 3124.61 3125.33 3125.70  
3126.79 3127.85 3128.28 3130.88 3139.20 3146.25  
3166.82 3167.52 3168.46 3172.77 3179.54 3179.93  
3180.45 3180.93 3183.45 3183.96 3184.34 3185.83  
3187.67 3191.63 3191.76 3192.68 3193.40 3195.78  
3200.76 3206.59 3206.92 3208.07 3217.74 3221.83  
3225.07 3227.40 3230.27

=====

15B-TS2

=====

-198.89 16.77 21.78 23.49 25.95 31.73  
32.64 34.85 35.35 41.62 44.78 47.01  
53.19 56.11 58.64 59.65 60.22 65.04  
68.82 70.64 72.03 77.40 81.43 82.16  
89.35 93.40 93.91 100.00 101.27 106.56  
110.09 111.60 119.07 125.28 127.85 134.88  
135.06 140.22 150.67 151.99 162.24 163.80  
166.05 174.02 178.25 185.72 187.99 194.87  
195.75 200.65 205.75 208.45 212.62 219.49  
222.59 226.61 230.11 239.76 241.07 244.42  
247.36 250.20 254.17 259.74 261.12 269.46  
282.29 286.37 289.31 293.29 299.06 307.75  
315.98 328.13 334.66 342.54 345.96 375.27  
389.53 393.94 408.18 413.08 420.87 429.40  
440.44 446.05 451.74 460.12 460.97 466.12  
476.80 483.66 485.25 497.07 499.28 515.65  
516.22 517.54 519.14 520.75 526.23 527.64  
529.76 529.94 534.39 534.61 540.99 541.85  
546.47 548.57 551.32 556.21 558.69 563.31  
564.92 568.94 571.01 579.87 600.75 602.89  
621.94 636.08 639.46 658.49 668.31 687.51  
691.51 703.39 707.87 712.23 715.05 719.12  
726.77 758.21 763.95 768.27 769.29 791.26  
805.39 814.98 820.67 841.56 842.67 846.43  
851.74 853.88 856.81 859.81 863.68 868.84  
871.88 874.15 878.71 878.76 884.47 887.70  
893.24 894.81 898.21 915.20 916.68 926.35  
931.25 937.62 939.29 941.66 942.24 955.05  
958.81 961.80 964.33 966.15 967.11 970.49  
971.74 978.52 989.23 1002.16 1003.84 1005.53  
1005.74 1011.63 1012.12 1013.42 1014.89 1017.13  
1024.20 1024.70 1028.07 1033.51 1033.63 1043.90  
1045.15 1047.60 1052.26 1056.08 1057.35 1060.76  
1064.51 1064.84 1065.32 1066.00 1066.85 1067.24  
1069.50 1070.05 1076.24 1076.98 1091.34 1099.64  
1119.40 1136.34 1139.88 1158.21 1161.15 1164.70  
1168.42 1169.84 1173.92 1174.18 1182.77 1187.90  
1199.81 1202.70 1204.37 1205.86 1206.74 1209.31  
1210.03 1211.73 1216.65 1224.65 1242.75 1256.74

1257.89 1264.57 1270.28 1288.45 1289.76 1291.27  
1292.98 1295.66 1301.62 1308.19 1316.55 1319.36  
1321.65 1326.00 1329.94 1341.36 1347.57 1349.41  
1357.49 1362.05 1363.06 1363.51 1387.24 1391.40  
1408.47 1410.47 1410.93 1426.09 1428.03 1428.43  
1429.60 1430.12 1430.28 1430.37 1431.56 1453.14  
1459.65 1461.29 1462.71 1463.13 1464.44 1465.20  
1466.58 1466.97 1466.98 1468.05 1471.00 1473.29  
1478.02 1484.86 1493.24 1496.61 1498.24 1499.55  
1500.27 1501.68 1501.85 1502.66 1503.09 1503.36  
1505.72 1505.99 1507.40 1509.32 1511.91 1513.75  
1517.12 1520.65 1521.21 1522.37 1524.30 1531.59  
1550.98 1554.14 1603.05 1603.92 1631.35 1635.11  
1636.46 1638.19 1639.06 1645.40 1645.62 1649.75  
1650.60 1651.05 1672.69 1674.70 1689.37 1784.93  
1909.86 2806.96 2870.95 2910.44 2970.37 2987.44  
3031.68 3036.01 3038.87 3039.25 3039.85 3040.64  
3040.73 3043.91 3047.38 3066.29 3093.13 3094.14  
3097.38 3097.41 3101.67 3102.59 3105.64 3113.11  
3114.50 3117.93 3118.65 3121.78 3122.59 3124.82  
3125.24 3125.61 3125.80 3128.59 3129.02 3143.73  
3147.97 3165.29 3169.70 3170.80 3173.41 3176.50  
3177.24 3178.02 3179.62 3179.70 3181.17 3182.74  
3184.20 3189.66 3191.24 3195.04 3196.23 3196.50  
3205.42 3206.96 3211.03 3211.86 3216.28 3223.94  
3231.17 3234.63 3235.73

=====

16A

=====

6.45 15.75 21.35 26.50 30.79 34.78  
39.27 40.24 40.41 43.34 44.46 47.24  
48.51 51.17 51.81 53.37 54.30 55.99  
60.85 62.50 66.54 70.86 73.74 75.99  
80.99 84.85 91.94 95.25 97.85 100.66  
105.09 108.54 115.66 118.97 127.19 131.24  
139.75 142.83 153.53 158.27 161.60 167.58  
168.46 170.20 178.03 180.88 188.41 191.42  
192.03 194.93 198.15 198.88 199.81 206.51  
214.99 220.61 225.82 229.83 230.79 239.42  
240.00 246.49 253.61 256.35 260.05 269.18  
282.67 286.59 292.68 293.11 296.49 319.58  
321.86 324.04 330.62 339.79 367.72 389.42  
393.76 409.05 410.76 414.74 425.95 430.18  
446.26 450.10 455.56 460.48 463.14 477.09  
486.51 491.89 496.14 509.78 510.86 516.08  
519.57 520.02 521.02 522.48 524.12 526.97  
530.69 532.75 533.47 534.48 536.01 544.31  
546.60 547.49 549.42 556.95 559.14 565.14  
569.39 571.81 594.63 604.44 616.23 628.09  
633.44 644.22 644.64 675.47 682.70 698.32  
703.98 705.61 706.83 708.10 709.09 717.23  
756.03 765.16 769.36 778.23 785.70 803.35  
807.94 810.47 837.94 839.15 842.50 849.36  
852.80 855.89 863.21 868.59 871.58 877.47  
879.58 880.10 885.52 890.47 895.17 900.71  
902.49 911.62 914.50 927.81 929.79 934.61  
937.91 940.87 943.42 944.17 949.86 956.68  
957.34 960.67 962.23 962.96 964.74 969.15  
972.42 987.18 989.87 999.27 1005.03 1006.52  
1007.46 1010.28 1011.00 1012.52 1015.88 1021.28  
1022.77 1023.85 1025.32 1038.53 1044.78 1045.70

1046.20 1047.02 1050.07 1050.58 1057.31 1063.81  
1064.28 1065.76 1065.90 1067.82 1068.08 1068.16  
1069.15 1072.59 1073.87 1087.35 1104.84 1116.87  
1136.37 1142.68 1159.07 1159.72 1160.90 1167.89  
1170.86 1174.60 1175.37 1179.22 1188.04 1200.44  
1203.65 1203.74 1206.02 1207.56 1208.80 1214.29  
1214.42 1222.06 1239.11 1242.52 1253.42 1257.60  
1267.82 1279.03 1284.67 1287.42 1290.97 1292.14  
1292.68 1293.30 1298.50 1316.50 1321.32 1322.89  
1324.04 1325.81 1334.94 1346.58 1351.10 1359.46  
1362.61 1363.36 1364.33 1367.73 1386.46 1407.67  
1407.87 1410.41 1421.70 1425.87 1425.91 1427.10  
1427.82 1428.85 1429.22 1430.39 1430.75 1431.48  
1452.69 1455.46 1457.01 1460.03 1461.12 1461.93  
1463.62 1465.07 1466.61 1467.27 1479.10 1485.80  
1493.16 1493.56 1494.21 1496.01 1496.41 1496.50  
1496.94 1497.55 1498.08 1499.24 1502.80 1503.49  
1504.82 1506.32 1506.72 1507.21 1508.73 1510.73  
1511.85 1518.06 1518.48 1520.77 1521.41 1526.34  
1547.81 1550.33 1595.93 1600.69 1607.72 1634.05  
1634.79 1635.69 1636.94 1638.51 1639.46 1645.78  
1648.59 1650.71 1651.28 1655.29 1674.38 1674.61  
1775.55 3002.69 3024.65 3030.46 3038.07 3040.36  
3040.68 3040.98 3041.64 3042.17 3042.36 3050.22  
3062.73 3070.32 3086.82 3100.00 3100.77 3101.55  
3102.60 3103.07 3103.24 3105.41 3110.69 3117.49  
3119.03 3123.05 3123.41 3124.65 3126.07 3128.14  
3128.40 3128.52 3129.37 3131.58 3131.90 3135.71  
3156.97 3157.65 3167.12 3168.29 3169.71 3170.51  
3175.54 3180.78 3181.24 3181.83 3183.44 3185.12  
3188.47 3191.55 3191.63 3194.70 3199.91 3205.80  
3206.16 3208.86 3214.04 3218.36 3224.99 3230.96  
3233.82 3238.53 3254.16

=====

16B

=====

4.18 13.05 15.88 23.04 28.76 31.71  
37.01 38.56 40.07 41.34 42.66 47.41  
50.89 52.54 53.16 55.01 56.89 58.51  
60.36 61.60 67.14 69.35 71.27 74.87  
79.72 86.53 94.95 98.17 99.92 102.03  
103.47 112.80 116.88 127.05 132.75 134.67  
140.59 144.63 158.80 159.86 162.37 167.72  
171.57 174.70 178.46 187.29 191.72 193.49  
195.12 196.87 199.61 201.42 210.11 218.47  
221.21 228.19 233.91 237.03 243.41 246.34  
252.45 264.39 269.69 275.29 282.02 285.91  
286.82 291.86 293.15 298.06 304.11 308.29  
324.76 328.84 344.60 346.35 372.00 379.46  
392.30 397.99 404.80 414.81 423.40 430.29  
437.85 449.01 450.02 453.61 459.92 470.36  
471.63 489.43 498.29 504.31 506.87 516.61  
517.75 521.03 521.79 524.64 526.33 528.31  
530.84 532.37 533.80 535.40 537.96 547.51  
549.48 553.71 555.79 558.96 562.88 565.72  
569.71 576.47 592.11 604.21 610.03 611.83  
632.82 647.17 664.05 668.81 684.32 702.48  
706.84 708.62 711.31 716.29 722.24 723.65  
764.83 768.85 769.54 773.27 784.15 804.17  
806.74 832.82 834.31 837.99 840.86 843.94  
852.04 856.97 857.92 869.50 871.56 872.89

875.02 883.02 889.38 889.97 891.12 896.05  
903.79 904.29 919.25 930.64 932.30 935.52  
942.31 944.20 946.40 950.45 955.18 958.19  
963.79 964.33 965.46 969.01 970.24 975.96  
976.52 990.86 992.90 1003.81 1007.53 1010.36  
1011.22 1013.72 1014.47 1014.63 1021.46 1022.95  
1024.79 1025.77 1027.66 1035.60 1044.68 1046.19  
1046.39 1047.72 1047.99 1058.21 1061.73 1065.36  
1065.50 1066.35 1067.09 1067.35 1068.26 1068.95  
1070.84 1073.75 1076.93 1100.35 1129.79 1131.69  
1134.55 1146.22 1161.69 1162.44 1164.96 1167.02  
1168.55 1172.99 1176.34 1178.61 1183.43 1189.06  
1202.36 1203.93 1206.14 1206.27 1208.28 1210.12  
1217.21 1217.78 1224.50 1240.86 1250.85 1257.42  
1262.31 1275.10 1281.54 1282.62 1284.79 1290.24  
1290.33 1292.48 1298.87 1319.63 1320.27 1327.20  
1327.59 1330.47 1332.77 1343.49 1344.76 1355.15  
1359.50 1360.03 1363.17 1366.87 1389.42 1401.57  
1408.93 1413.64 1414.41 1427.51 1428.20 1429.02  
1429.42 1430.42 1431.16 1431.38 1431.51 1432.60  
1453.14 1457.44 1458.17 1459.27 1462.34 1464.41  
1465.22 1465.52 1467.22 1467.74 1476.22 1479.51  
1483.48 1490.45 1493.33 1493.86 1494.04 1496.71  
1497.38 1498.22 1499.72 1500.34 1500.53 1500.59  
1501.15 1502.94 1507.27 1510.23 1510.48 1512.02  
1512.54 1518.72 1520.14 1522.70 1523.06 1525.22  
1547.82 1550.93 1580.06 1602.50 1607.22 1626.78  
1633.61 1634.39 1636.80 1639.09 1639.85 1642.75  
1648.53 1649.65 1650.18 1651.47 1674.00 1674.58  
1787.83 2961.65 2995.32 3037.29 3037.62 3037.77  
3039.62 3040.55 3041.25 3042.05 3043.98 3046.56  
3061.90 3079.55 3094.49 3095.96 3098.62 3099.76  
3099.91 3101.51 3102.03 3105.26 3110.37 3114.97  
3122.33 3123.61 3126.45 3127.78 3128.34 3129.04  
3129.31 3129.64 3131.34 3140.94 3144.07 3165.10  
3167.93 3170.49 3170.79 3171.67 3171.96 3172.58  
3173.43 3175.53 3176.89 3178.27 3180.02 3180.81  
3182.04 3183.77 3184.78 3190.78 3191.84 3196.59  
3203.78 3205.02 3205.83 3206.66 3210.69 3222.40  
3231.68 3239.46 3254.97

=====

18A

=====

12.81 19.04 23.29 24.77 31.78 32.38  
32.85 36.08 37.47 39.29 42.23 49.02  
51.97 52.63 54.72 55.89 59.93 64.56  
66.25 69.76 71.50 72.63 74.72 78.59  
80.16 84.95 88.23 92.37 93.16 97.10  
103.87 109.69 119.29 122.93 125.02 144.82  
150.80 155.66 160.11 167.11 171.31 173.88  
176.93 178.39 184.65 188.65 191.87 194.97  
198.41 203.98 204.37 213.46 218.43 221.77  
227.98 231.58 233.98 235.68 239.42 243.77  
246.69 252.78 256.42 259.24 267.59 281.41  
283.46 285.74 289.40 295.40 296.83 306.38  
311.10 318.07 337.85 341.56 361.25 391.19  
396.29 400.77 411.40 416.14 424.07 438.38  
444.92 449.56 453.61 462.79 465.45 485.25  
489.00 491.55 493.94 499.43 505.49 518.15  
518.44 520.01 522.30 523.46 524.72 525.89  
526.84 528.44 534.41 536.89 542.50 542.82

546.22 555.88 559.02 561.39 563.09 564.43  
568.53 574.41 601.15 609.28 619.03 621.83  
631.59 657.43 660.52 686.63 689.02 691.49  
699.81 704.38 705.52 705.98 709.11 713.28  
765.69 769.57 774.90 784.80 788.85 804.22  
806.19 812.12 829.57 840.84 848.65 851.51  
853.28 860.32 860.94 863.78 865.09 868.23  
871.14 876.24 876.87 879.28 880.70 892.97  
895.65 899.25 905.85 912.43 917.18 929.61  
937.50 940.42 941.96 947.23 951.50 957.66  
960.28 965.48 966.54 971.02 972.07 975.09  
985.42 997.53 999.59 1001.71 1004.70 1006.68  
1008.22 1009.99 1013.03 1013.38 1015.63 1023.47  
1023.83 1025.36 1026.88 1031.50 1041.60 1043.33  
1046.55 1047.22 1047.62 1056.61 1060.71 1063.52  
1064.66 1066.60 1066.89 1067.58 1068.04 1068.66  
1070.59 1072.12 1075.87 1079.26 1102.85 1133.92  
1134.59 1157.14 1158.66 1160.07 1161.63 1165.89  
1167.18 1175.35 1178.54 1188.74 1199.47 1205.84  
1207.90 1208.10 1209.24 1210.15 1210.74 1213.40  
1214.77 1220.98 1240.60 1244.97 1257.05 1258.17  
1262.43 1285.23 1290.07 1291.02 1291.63 1295.48  
1302.42 1303.85 1311.98 1317.87 1320.61 1321.07  
1325.52 1330.77 1346.63 1357.37 1357.82 1359.10  
1360.00 1362.05 1366.78 1379.36 1386.88 1405.49  
1408.35 1411.30 1415.54 1425.84 1425.89 1427.89  
1428.78 1429.16 1429.35 1430.56 1431.59 1432.74  
1435.48 1454.82 1456.60 1460.13 1460.68 1462.39  
1463.50 1464.60 1467.19 1468.44 1468.86 1475.96  
1481.34 1490.53 1493.44 1497.17 1497.44 1498.20  
1499.90 1500.22 1500.44 1501.27 1501.77 1502.28  
1502.95 1506.88 1507.55 1510.24 1510.81 1513.10  
1514.63 1516.98 1517.63 1521.60 1524.70 1530.63  
1550.94 1553.39 1596.71 1602.36 1632.80 1633.93  
1635.81 1636.11 1637.93 1639.28 1648.56 1649.48  
1650.42 1651.41 1673.09 1673.76 1674.65 1688.66  
1781.69 2886.45 2996.87 3004.30 3017.12 3025.78  
3032.56 3035.53 3038.71 3039.04 3039.37 3041.73  
3042.83 3043.98 3047.36 3063.80 3086.09 3086.83  
3097.48 3097.55 3100.77 3101.42 3101.78 3103.71  
3106.56 3112.81 3113.62 3125.25 3126.72 3128.02  
3129.73 3131.22 3132.62 3132.97 3133.59 3138.50  
3144.79 3154.06 3154.18 3170.28 3172.05 3174.12  
3174.50 3175.95 3176.62 3180.90 3182.09 3183.59  
3185.49 3186.06 3191.11 3193.62 3199.25 3202.25  
3203.88 3206.39 3208.47 3209.23 3212.86 3219.71  
3222.49 3226.64 3233.87

=====

18B

=====

12.27 14.34 18.00 21.86 25.37 28.38  
34.89 36.32 39.34 41.69 43.98 47.06  
47.83 51.64 55.63 61.56 64.71 64.90  
65.35 70.63 71.99 72.59 75.85 79.32  
80.52 84.41 88.65 93.34 96.00 105.39  
109.36 115.15 119.86 125.22 138.03 144.10  
152.73 156.08 158.97 161.30 166.43 170.44  
171.40 175.91 177.78 181.12 186.16 191.91  
193.14 198.28 203.50 204.37 210.82 218.20  
223.81 225.91 230.90 231.66 237.59 237.92  
240.65 251.31 255.08 255.86 258.34 280.27

283.82 288.64 295.99 296.77 302.46 306.41  
310.64 328.03 336.39 341.94 357.06 390.97  
396.51 401.95 413.45 418.13 420.80 424.69  
447.05 449.57 454.12 463.15 466.53 467.75  
485.18 489.19 490.45 500.97 508.57 517.59  
518.27 518.55 520.46 523.64 523.85 525.33  
526.27 529.80 535.86 537.02 543.09 544.22  
548.88 555.83 558.99 559.45 564.69 565.01  
568.17 576.57 602.30 608.24 622.82 623.89  
631.88 659.16 686.99 688.28 690.01 701.88  
705.39 706.01 706.21 708.56 713.63 746.34  
765.13 768.79 769.94 788.50 789.02 804.20  
810.30 812.19 841.95 847.81 848.95 852.37  
854.37 861.12 863.07 865.73 867.64 871.24  
872.64 876.78 878.11 878.97 881.10 892.74  
895.21 902.84 907.25 912.31 915.42 930.44  
934.53 937.91 939.22 942.82 952.52 958.44  
960.95 965.44 966.81 970.46 971.06 973.63  
985.79 997.87 1000.64 1002.67 1006.17 1006.77  
1009.48 1013.22 1014.39 1015.50 1023.05 1023.75  
1024.11 1024.29 1025.26 1033.06 1041.77 1043.66  
1046.56 1046.65 1054.50 1055.76 1059.14 1063.07  
1065.15 1065.46 1065.88 1066.50 1067.59 1068.37  
1068.70 1070.77 1075.50 1089.30 1114.18 1134.48  
1136.52 1160.82 1162.60 1164.26 1169.23 1170.33  
1175.27 1177.24 1187.95 1198.84 1204.85 1206.85  
1208.90 1209.53 1209.57 1209.98 1210.53 1214.34  
1215.61 1231.69 1244.18 1251.88 1256.16 1257.37  
1283.87 1288.23 1291.47 1292.13 1292.64 1294.91  
1300.16 1301.78 1318.10 1318.84 1320.42 1322.91  
1325.87 1345.63 1356.84 1358.90 1360.04 1362.34  
1362.88 1365.55 1371.72 1383.12 1385.05 1407.43  
1410.54 1415.71 1419.50 1425.37 1426.04 1426.81  
1428.49 1428.89 1429.07 1430.60 1431.03 1431.36  
1456.35 1456.97 1461.12 1461.64 1462.32 1465.29  
1465.60 1466.34 1467.44 1468.81 1482.77 1488.56  
1494.34 1496.82 1497.05 1497.76 1499.20 1499.93  
1500.70 1501.74 1502.13 1502.39 1502.62 1503.03  
1503.40 1503.85 1507.45 1509.65 1510.35 1511.88  
1514.87 1518.30 1518.83 1520.64 1521.92 1533.42  
1549.09 1553.10 1595.18 1601.48 1609.89 1634.83  
1635.07 1636.28 1637.74 1638.34 1639.01 1648.96  
1649.95 1651.41 1652.28 1671.84 1674.43 1685.65  
1691.74 2969.39 3004.54 3023.50 3029.65 3032.65  
3034.95 3035.48 3039.36 3039.93 3040.29 3041.19  
3043.16 3047.47 3048.82 3051.31 3074.29 3082.24  
3094.51 3095.10 3096.34 3098.19 3101.07 3102.01  
3102.34 3103.79 3113.53 3124.37 3126.60 3128.30  
3128.80 3129.21 3130.14 3130.33 3131.42 3131.59  
3164.87 3166.95 3170.19 3170.45 3172.40 3177.79  
3179.26 3180.88 3181.83 3183.58 3185.19 3185.28  
3190.13 3192.24 3192.42 3196.02 3196.33 3201.18  
3202.73 3203.30 3207.89 3208.73 3211.95 3215.23  
3221.29 3225.57 3233.69

=====

16A-TS

=====

-322.35 4.71 14.71 27.09 30.44 34.10  
38.56 40.46 44.32 46.82 50.88 53.18  
54.57 56.41 59.31 66.29 67.72 69.15  
73.94 75.49 76.65 78.22 80.24 88.69

91.11 93.34 96.24 97.28 101.92 107.98  
109.62 113.47 118.48 124.48 125.80 140.51  
146.61 149.14 153.91 160.60 162.71 166.58  
172.39 175.52 178.08 185.74 193.53 193.69  
195.38 198.54 204.60 205.82 206.30 209.91  
222.98 226.65 229.51 234.58 238.10 241.53  
246.19 255.86 265.18 270.23 277.45 283.53  
286.29 297.46 299.01 304.83 306.15 319.51  
322.77 326.49 336.52 341.55 362.79 383.59  
397.95 401.57 414.27 417.35 424.78 429.17  
445.77 451.02 452.40 461.25 465.64 481.99  
486.09 487.38 494.94 496.84 504.43 514.59  
519.17 519.85 521.61 524.51 526.74 527.79  
531.05 533.01 537.34 542.21 544.57 546.25  
548.66 549.97 551.31 552.76 556.75 561.05  
563.26 564.20 567.44 573.85 597.11 617.94  
633.22 640.19 652.22 679.92 689.73 705.26  
705.82 708.28 712.45 715.76 719.53 725.32  
766.12 767.87 769.13 777.94 788.75 803.96  
804.95 813.92 831.71 837.78 845.67 856.01  
860.32 864.85 868.80 870.05 872.06 875.10  
877.26 881.19 883.42 887.93 890.27 892.97  
904.46 907.99 919.28 927.50 929.23 933.72  
939.01 945.30 949.16 955.55 957.93 959.48  
962.39 963.06 968.25 969.65 971.86 972.74  
984.29 985.44 986.82 991.45 1005.25 1005.80  
1009.90 1012.43 1013.69 1013.94 1015.48 1022.65  
1024.03 1024.51 1025.11 1025.30 1039.10 1044.94  
1046.58 1047.09 1049.25 1055.72 1059.37 1063.61  
1065.00 1065.36 1065.38 1066.02 1067.32 1068.49  
1069.96 1072.75 1075.94 1080.95 1103.40 1108.27  
1141.26 1152.84 1156.60 1158.09 1162.35 1164.51  
1166.40 1169.39 1174.71 1181.39 1189.74 1201.44  
1203.81 1204.16 1204.61 1207.08 1208.18 1216.40  
1216.66 1217.35 1238.77 1244.01 1251.19 1259.27  
1262.73 1272.58 1284.69 1289.35 1291.31 1291.70  
1292.15 1295.22 1301.33 1316.75 1318.03 1318.89  
1321.74 1323.21 1339.55 1346.49 1350.07 1359.17  
1360.02 1360.54 1361.99 1368.32 1391.06 1412.24  
1412.32 1412.51 1416.79 1423.66 1423.98 1426.52  
1426.79 1427.76 1427.90 1430.81 1430.90 1434.22  
1451.96 1455.42 1460.31 1463.05 1463.76 1464.60  
1465.58 1465.90 1466.12 1468.84 1472.78 1481.08  
1487.48 1488.56 1493.92 1494.90 1496.71 1498.17  
1498.61 1499.85 1500.62 1500.91 1501.80 1502.27  
1502.49 1503.88 1506.00 1508.30 1509.82 1510.78  
1511.13 1518.00 1518.45 1520.93 1523.94 1528.91  
1542.55 1552.39 1553.45 1601.58 1607.12 1618.06  
1630.37 1633.55 1636.96 1638.41 1641.73 1642.95  
1645.99 1648.07 1651.16 1651.75 1674.31 1674.90  
1750.44 3026.91 3032.67 3035.77 3035.86 3038.90  
3040.19 3040.92 3041.08 3042.34 3044.38 3045.03  
3052.81 3059.07 3070.87 3092.52 3097.68 3098.61  
3101.63 3103.68 3104.13 3105.50 3106.66 3107.74  
3110.25 3121.91 3125.59 3125.60 3127.37 3128.24  
3128.31 3129.04 3129.54 3130.62 3157.17 3159.47  
3162.46 3165.51 3168.20 3170.03 3170.85 3173.95  
3175.45 3175.82 3178.24 3179.43 3180.98 3182.25  
3182.34 3184.24 3184.89 3188.25 3190.56 3192.79  
3204.15 3205.10 3206.00 3219.09 3220.22 3230.49  
3238.03 3239.29 3266.01

=====  
16B-TS  
=====  
-312.17 11.29 20.26 28.51 33.06 36.23  
38.89 41.60 44.84 46.52 46.89 50.69  
51.26 52.60 55.43 58.18 60.84 63.13  
65.39 69.45 71.57 76.01 77.98 81.64  
88.33 93.20 97.58 102.33 107.00 109.74  
114.74 125.91 129.19 136.67 143.72 146.96  
161.19 164.17 168.46 171.49 172.71 176.02  
180.72 181.64 184.51 189.05 193.04 194.67  
195.72 199.52 200.28 205.14 216.13 217.66  
221.82 227.63 229.23 234.97 236.30 248.43  
252.74 254.96 270.51 278.39 281.93 286.69  
289.49 290.56 296.32 300.26 315.68 318.08  
323.07 324.37 334.69 340.35 358.02 361.76  
394.60 402.66 408.93 414.48 422.56 426.91  
438.91 445.37 450.98 453.92 462.40 467.94  
483.52 486.24 492.22 492.92 500.05 501.06  
514.69 515.62 516.00 519.68 522.84 525.28  
526.74 529.14 531.87 532.92 534.77 537.54  
543.35 546.79 550.88 556.42 561.11 561.34  
565.48 568.98 571.51 588.03 595.78 605.82  
628.42 630.42 640.20 661.42 682.96 683.92  
701.58 703.99 707.37 716.16 717.05 726.30  
739.81 762.71 767.54 767.94 785.88 792.39  
801.11 804.20 828.88 838.31 840.13 842.37  
844.89 856.26 858.98 865.29 867.09 869.98  
874.15 875.75 883.22 885.19 891.05 893.53  
901.03 904.18 922.66 924.88 930.72 932.29  
934.26 943.18 945.49 945.84 949.98 962.67  
964.74 967.55 968.47 971.59 972.61 973.77  
983.43 987.98 989.16 991.43 1005.64 1006.04  
1006.75 1013.20 1013.57 1014.10 1023.10 1023.69  
1024.32 1024.67 1025.59 1026.77 1041.01 1046.52  
1047.04 1048.07 1050.00 1056.68 1064.34 1064.66  
1065.34 1065.70 1065.86 1066.33 1066.99 1067.18  
1069.49 1074.34 1075.74 1093.30 1106.81 1114.12  
1130.09 1149.81 1156.57 1160.56 1162.23 1167.18  
1168.81 1172.28 1175.02 1178.23 1188.85 1190.68  
1200.85 1204.01 1205.96 1206.14 1207.34 1208.01  
1215.69 1218.96 1224.38 1239.21 1249.08 1255.59  
1262.55 1276.58 1280.19 1288.83 1290.20 1291.27  
1291.77 1292.30 1299.22 1319.23 1319.34 1322.66  
1323.79 1327.52 1333.57 1344.88 1345.49 1361.01  
1361.80 1362.20 1364.74 1370.66 1389.49 1408.82  
1412.48 1414.33 1417.28 1422.72 1424.06 1424.27  
1426.52 1426.57 1426.74 1429.95 1430.06 1431.88  
1453.50 1455.39 1457.39 1462.36 1462.72 1464.40  
1465.27 1465.50 1467.53 1468.19 1475.68 1479.72  
1482.28 1492.81 1492.94 1494.06 1498.84 1499.73  
1500.52 1500.88 1501.44 1501.72 1501.99 1502.82  
1502.99 1507.86 1508.46 1509.22 1509.78 1511.74  
1512.70 1518.20 1518.55 1521.40 1522.10 1532.57  
1547.17 1549.13 1551.89 1601.64 1604.78 1617.38  
1633.39 1634.72 1637.09 1637.78 1638.83 1640.24  
1647.90 1649.08 1651.60 1652.14 1673.71 1674.60  
1780.38 3035.71 3037.62 3037.84 3041.59 3041.91  
3042.24 3042.55 3045.10 3046.38 3047.74 3048.41  
3052.78 3067.77 3070.30 3099.05 3099.16 3101.77  
3103.58 3107.69 3109.55 3110.85 3114.10 3114.66

3114.84 3118.36 3121.45 3123.09 3125.75 3127.56  
3129.35 3129.90 3130.53 3132.71 3149.44 3155.97  
3163.12 3168.35 3169.58 3170.77 3172.16 3177.07  
3177.14 3177.17 3177.50 3178.82 3179.33 3180.06  
3180.17 3180.35 3188.46 3188.99 3191.33 3193.16  
3202.11 3204.52 3205.02 3209.88 3218.43 3224.49  
3226.35 3245.17 3250.81

=====

18A-TS

=====

-258.09 8.83 17.87 20.80 29.37 30.26  
37.08 38.85 40.38 42.87 44.91 46.23  
48.28 51.85 52.92 55.73 57.12 64.33  
65.16 67.98 71.92 73.10 84.09 87.23  
94.51 100.57 103.53 107.94 113.04 116.13  
124.50 127.59 133.94 143.18 145.33 153.80  
154.62 158.82 164.68 167.36 173.43 178.32  
179.85 183.73 188.11 188.93 194.80 199.54  
207.51 208.79 212.64 215.46 220.38 226.37  
233.61 235.62 239.92 246.66 252.69 256.45  
262.17 267.16 270.91 285.34 286.01 289.11  
296.53 299.23 303.11 311.32 328.67 332.37  
341.34 341.85 369.40 390.25 397.37 399.49  
414.36 418.73 426.40 431.86 437.07 441.55  
445.22 453.76 463.84 470.69 474.30 476.85  
487.26 497.04 500.19 517.30 518.93 519.96  
522.40 523.78 527.27 528.41 530.05 530.63  
532.10 537.37 543.26 547.62 548.50 552.21  
553.63 555.34 558.80 561.74 567.73 571.41  
579.16 595.17 610.76 614.93 620.87 636.23  
654.61 661.69 676.31 681.50 690.80 704.19  
706.83 710.41 713.90 715.58 718.27 739.43  
767.68 768.91 769.75 792.07 804.49 814.64  
816.14 835.61 837.85 839.41 840.08 854.86  
860.03 864.38 866.34 871.76 875.29 876.99  
879.12 879.80 884.86 887.39 892.55 894.38  
905.01 914.55 915.74 921.04 931.16 934.53  
942.62 944.34 944.79 947.56 957.83 961.01  
963.25 966.04 969.91 972.40 974.53 975.98  
989.66 991.48 991.70 1005.51 1007.92 1008.64  
1009.36 1011.76 1013.92 1015.31 1020.31 1024.57  
1025.55 1026.08 1038.13 1047.54 1048.07 1049.12  
1049.87 1051.33 1056.91 1061.78 1065.30 1065.36  
1065.73 1065.91 1067.54 1068.41 1072.66 1074.20  
1075.70 1082.00 1087.47 1110.83 1128.50 1137.51  
1157.56 1158.39 1161.21 1161.92 1165.52 1171.94  
1175.61 1178.87 1183.57 1188.51 1201.30 1203.94  
1204.86 1205.20 1206.67 1209.73 1210.07 1213.16  
1214.66 1223.80 1228.42 1240.77 1253.41 1255.60  
1257.92 1266.25 1273.12 1282.43 1284.55 1286.19  
1293.55 1296.01 1300.82 1301.35 1307.07 1319.18  
1321.78 1322.59 1329.43 1338.13 1343.61 1352.04  
1358.98 1360.92 1363.15 1365.42 1366.21 1387.78  
1396.34 1407.25 1411.95 1428.39 1428.55 1429.32  
1429.68 1430.31 1430.96 1431.89 1432.90 1434.54  
1453.57 1454.98 1458.51 1462.19 1463.03 1463.42  
1464.20 1464.56 1467.73 1469.33 1473.97 1480.57  
1490.12 1492.46 1495.36 1496.95 1497.27 1499.10  
1500.64 1501.13 1501.94 1502.72 1502.92 1503.73  
1505.38 1505.85 1508.91 1509.77 1512.28 1512.44  
1513.74 1518.59 1519.35 1523.86 1524.66 1525.26

1537.40 1547.15 1553.11 1588.38 1612.36 1621.69  
1629.50 1632.17 1636.14 1636.91 1638.44 1646.41  
1647.12 1648.34 1650.69 1652.45 1670.95 1673.80  
1773.03 2393.88 2414.47 2531.56 3005.48 3021.73  
3030.59 3033.33 3037.70 3039.84 3040.07 3040.13  
3041.35 3042.98 3043.67 3046.31 3061.98 3090.35  
3095.51 3098.20 3099.09 3100.43 3101.05 3101.79  
3102.19 3102.66 3104.79 3124.01 3124.30 3125.28  
3126.59 3127.84 3128.37 3130.22 3130.35 3135.50  
3140.70 3143.17 3164.59 3165.67 3165.96 3166.58  
3167.45 3178.31 3178.95 3180.14 3181.38 3185.06  
3185.58 3187.79 3191.69 3192.00 3198.67 3205.31  
3205.56 3207.06 3215.45 3219.01 3221.40 3222.26  
3222.56 3223.09 3261.91

=====

18B-TS

=====

-142.63 10.25 16.71 21.10 28.27 30.75  
33.00 36.35 41.32 44.54 47.89 48.52  
51.12 56.65 59.67 59.87 61.27 66.07  
69.87 74.74 77.17 79.19 87.10 87.64  
92.89 94.59 98.63 102.75 107.51 110.08  
111.63 113.02 122.01 130.51 132.41 141.20  
141.86 153.49 162.74 164.78 169.48 172.60  
177.11 179.96 184.46 187.88 189.52 196.95  
197.15 200.18 202.03 203.72 214.54 219.82  
221.87 228.58 231.77 236.73 242.12 245.73  
250.81 257.22 266.32 270.08 278.18 282.67  
284.94 287.45 296.30 300.35 304.28 315.68  
321.61 341.57 343.31 362.86 378.37 391.82  
400.45 408.14 414.79 419.16 423.80 430.04  
446.08 451.45 458.34 464.14 466.34 481.62  
485.13 487.00 496.84 501.99 513.01 518.61  
519.69 520.64 523.26 525.27 527.95 529.57  
532.95 533.14 535.09 538.11 542.48 546.12  
546.49 551.63 555.20 559.33 561.80 565.97  
571.50 572.80 575.72 595.71 616.59 623.84  
636.43 655.93 681.48 690.24 696.92 699.03  
708.34 710.56 712.93 715.33 721.47 748.73  
764.57 768.65 784.61 790.69 796.51 805.09  
813.53 830.04 837.65 839.58 846.58 850.54  
854.02 862.30 868.96 872.50 874.51 876.33  
879.83 881.18 881.83 887.62 890.35 890.79  
894.53 907.11 915.79 921.60 927.32 929.47  
935.70 941.64 944.56 946.20 952.20 956.90  
962.76 964.06 966.91 967.39 969.67 969.86  
973.49 987.53 991.98 992.17 1003.42 1005.70  
1009.25 1011.60 1011.78 1012.79 1015.32 1023.16  
1023.98 1024.75 1025.51 1026.20 1038.14 1046.57  
1047.38 1047.97 1049.43 1052.14 1057.42 1059.59  
1063.49 1064.50 1065.21 1065.90 1067.10 1067.75  
1069.89 1069.97 1072.73 1080.66 1085.65 1123.67  
1142.14 1156.11 1163.68 1165.71 1166.85 1169.33  
1171.52 1174.53 1180.49 1188.29 1194.01 1201.13  
1202.22 1205.05 1205.13 1206.58 1207.47 1214.85  
1216.56 1219.79 1235.65 1239.40 1248.98 1258.71  
1259.74 1262.31 1273.19 1285.63 1289.99 1291.89  
1293.77 1295.31 1300.35 1307.26 1309.30 1317.59  
1321.01 1321.36 1330.83 1332.79 1342.59 1354.67  
1359.31 1360.35 1360.46 1365.88 1368.06 1387.77  
1396.56 1408.36 1410.15 1417.83 1423.98 1425.56

1426.18 1426.67 1427.48 1429.34 1430.31 1431.26  
1431.61 1454.39 1455.32 1461.31 1462.65 1464.19  
1464.80 1465.16 1465.38 1466.34 1466.71 1469.28  
1480.55 1484.73 1491.14 1496.43 1497.02 1497.69  
1498.24 1499.28 1499.84 1500.22 1500.26 1502.52  
1502.86 1503.94 1504.49 1504.58 1508.71 1509.50  
1509.70 1514.94 1519.18 1519.86 1520.02 1524.71  
1527.71 1551.45 1552.34 1598.75 1604.08 1630.29  
1637.95 1638.49 1638.92 1642.29 1643.27 1645.62  
1649.84 1650.59 1651.39 1652.71 1672.18 1674.43  
1763.32 2990.12 3028.98 3033.50 3035.92 3036.06  
3039.08 3041.45 3042.53 3042.62 3043.87 3044.22  
3046.85 3047.56 3049.27 3064.57 3089.88 3096.59  
3096.84 3100.20 3100.73 3101.59 3103.15 3105.46  
3105.60 3113.66 3121.31 3122.41 3125.57 3129.05  
3131.08 3131.19 3131.54 3131.69 3136.17 3137.91  
3145.35 3147.38 3168.21 3169.30 3169.47 3169.55  
3173.23 3173.61 3177.86 3178.07 3178.24 3179.39  
3180.79 3182.38 3183.92 3185.17 3188.78 3191.23  
3202.80 3206.44 3206.92 3207.89 3219.69 3224.79  
3226.18 3235.63 3237.16

=====

17

=====

13.79 17.62 22.12 25.18 26.12 28.77  
32.55 34.06 37.08 42.95 45.73 48.67  
50.64 51.67 56.87 60.29 61.41 63.12  
68.45 73.63 77.01 82.98 92.00 94.58  
97.63 99.70 104.40 107.94 110.70 113.52  
114.04 131.25 135.35 138.86 144.05 146.63  
152.11 161.43 166.65 169.12 172.14 177.86  
184.45 188.15 189.09 191.74 196.23 198.22  
198.62 202.21 204.43 207.03 209.27 215.41  
221.97 226.30 231.11 237.06 245.21 250.04  
254.74 262.91 267.62 272.05 281.80 282.87  
288.52 293.89 298.91 300.07 309.94 313.18  
328.48 331.12 345.36 356.04 376.82 388.18  
400.78 402.71 414.99 418.76 430.30 433.15  
444.67 450.06 453.37 461.01 469.83 476.75  
490.18 499.25 500.88 518.53 519.54 520.37  
523.99 525.35 526.39 528.85 529.90 531.45  
531.72 532.34 537.11 545.00 547.70 550.20  
554.09 557.05 558.94 559.74 561.99 566.14  
570.78 573.22 581.56 597.44 617.31 635.66  
639.74 654.33 656.91 682.27 690.73 706.44  
709.08 711.38 713.13 715.90 723.60 764.17  
767.61 769.51 790.21 800.56 806.82 814.33  
820.78 835.46 837.97 850.16 853.07 861.05  
868.74 870.86 871.64 874.26 876.21 879.34  
880.11 882.54 885.41 888.77 893.38 908.47  
915.32 917.16 917.86 926.59 932.18 932.54  
939.15 941.50 946.04 957.49 958.38 964.26  
965.03 966.09 968.88 970.08 971.94 988.43  
989.33 996.24 1000.03 1002.87 1006.11 1012.45  
1012.75 1013.52 1015.32 1021.80 1023.38 1023.91  
1024.53 1033.86 1044.53 1045.98 1047.26 1048.51  
1049.36 1058.48 1060.06 1064.86 1065.32 1066.03  
1066.84 1067.76 1068.97 1069.26 1076.01 1076.44  
1077.44 1093.07 1097.79 1104.48 1116.18 1142.23  
1155.26 1158.58 1161.38 1163.26 1167.90 1174.97  
1182.02 1183.34 1189.38 1201.53 1204.18 1204.98

1205.17 1207.62 1210.54 1213.14 1216.48 1216.89  
1224.79 1237.47 1244.00 1261.18 1262.52 1264.04  
1271.81 1283.79 1286.35 1286.70 1289.13 1295.17  
1296.10 1301.14 1320.78 1322.43 1324.42 1328.28  
1331.88 1342.03 1347.59 1351.02 1359.41 1361.09  
1363.66 1368.44 1369.05 1372.66 1391.89 1412.30  
1413.27 1421.64 1424.23 1424.43 1425.61 1427.47  
1429.60 1429.92 1430.28 1431.49 1433.57 1438.19  
1455.20 1456.67 1458.70 1461.82 1463.33 1463.86  
1464.76 1466.00 1467.09 1467.85 1469.36 1480.73  
1482.71 1494.47 1494.63 1495.67 1496.65 1496.79  
1497.91 1498.92 1499.95 1500.54 1501.18 1501.72  
1502.71 1503.03 1505.70 1511.27 1512.33 1514.14  
1514.79 1516.71 1520.44 1520.54 1523.55 1527.74  
1533.88 1552.13 1552.93 1602.05 1609.52 1630.58  
1636.95 1638.49 1638.92 1641.49 1643.16 1649.16  
1651.78 1652.12 1654.45 1660.83 1675.39 1676.03  
1782.07 2988.17 2994.87 3012.12 3032.44 3036.27  
3038.20 3039.83 3040.24 3040.96 3042.22 3042.50  
3044.18 3048.17 3067.54 3069.34 3098.14 3100.32  
3100.50 3101.08 3101.52 3102.00 3109.14 3112.78  
3113.17 3116.14 3120.17 3122.26 3125.61 3127.62  
3129.03 3130.72 3131.71 3136.17 3146.29 3154.43  
3164.74 3167.32 3170.11 3171.51 3172.92 3176.04  
3179.34 3179.65 3182.07 3183.39 3184.03 3186.05  
3188.00 3189.13 3189.99 3191.38 3191.92 3194.22  
3206.82 3208.84 3218.69 3230.54 3230.83 3234.55  
3237.55 3242.61 3245.43

=====

19

=====

11.27 17.99 25.43 29.55 32.85 38.13  
39.89 41.00 43.79 46.76 47.72 51.31  
55.85 56.34 57.44 58.46 62.93 65.01  
66.73 73.06 76.38 81.34 88.61 94.23  
94.79 99.40 102.58 111.08 112.50 120.71  
133.28 136.76 138.46 141.21 146.90 157.25  
162.35 162.62 164.04 165.10 171.09 177.62  
186.42 187.19 188.86 191.03 193.96 197.87  
202.21 207.49 209.41 216.93 217.60 223.56  
224.68 226.83 231.09 235.37 247.37 252.33  
260.07 264.32 268.01 280.62 285.95 288.25  
297.17 298.52 301.29 303.36 320.02 323.91  
335.10 346.35 367.46 383.58 394.25 395.58  
399.36 413.75 415.89 429.65 433.19 439.19  
443.57 447.91 452.40 463.07 471.63 474.75  
485.82 496.56 498.97 513.53 516.88 518.73  
520.36 521.95 524.13 527.90 529.25 532.84  
534.55 535.52 536.85 544.20 546.19 547.65  
549.90 556.27 559.32 563.03 570.20 571.55  
580.02 586.04 593.61 609.17 618.83 637.83  
639.08 656.17 680.07 684.90 690.78 708.66  
708.81 711.54 717.09 719.41 721.29 767.53  
768.79 788.28 789.69 792.05 804.17 816.79  
823.03 838.64 840.75 852.25 854.42 862.76  
866.88 872.08 876.41 877.32 880.82 883.65  
887.15 893.26 893.46 894.89 898.41 917.74  
919.29 921.93 922.77 926.16 936.31 939.54  
940.50 943.05 945.70 957.72 964.13 964.64  
965.44 968.06 968.49 972.77 974.48 980.52  
988.98 991.38 992.02 1007.06 1007.93 1011.44



1013.35 1014.36 1014.82 1022.58 1023.90 1026.68  
1027.58 1029.47 1043.78 1047.44 1048.28 1049.94  
1050.24 1058.48 1061.09 1065.08 1065.88 1066.11  
1067.36 1067.53 1068.23 1069.00 1072.62 1075.39  
1076.17 1081.21 1104.37 1117.72 1135.25 1154.33  
1161.03 1162.76 1167.74 1169.40 1171.55 1174.58  
1179.69 1184.71 1188.30 1198.00 1201.32 1204.72  
1205.95 1206.82 1207.09 1208.97 1211.85 1215.29  
1227.31 1236.49 1240.77 1256.97 1258.35 1259.63  
1271.22 1286.03 1287.92 1288.64 1289.04 1296.57  
1297.88 1301.03 1320.67 1323.13 1323.25 1325.59  
1328.46 1331.84 1335.58 1339.87 1349.40 1360.32  
1361.63 1363.12 1365.34 1391.08 1395.63 1408.26  
1408.57 1412.20 1420.44 1428.23 1428.99 1429.04  
1429.23 1430.47 1431.25 1431.75 1432.36 1433.61  
1434.45 1451.89 1458.16 1459.68 1462.43 1462.73  
1463.59 1465.02 1466.26 1466.89 1467.55 1479.34  
1487.18 1491.07 1493.20 1496.06 1497.07 1497.19  
1497.66 1498.55 1499.58 1499.89 1501.88 1502.12  
1502.48 1504.12 1505.34 1509.83 1510.41 1510.93  
1511.17 1514.10 1514.59 1519.95 1522.69 1525.39  
1528.93 1537.54 1548.85 1552.10 1592.29 1610.62  
1633.29 1635.25 1635.41 1635.64 1642.00 1643.88  
1648.25 1648.49 1650.13 1650.58 1671.70 1673.92  
1796.43 2981.75 3000.01 3022.70 3034.03 3037.33  
3038.69 3040.56 3040.91 3041.18 3041.66 3042.65  
3043.50 3049.11 3073.96 3097.39 3098.09 3101.04  
3101.18 3101.61 3101.81 3102.75 3104.53 3105.29  
3112.11 3115.61 3127.66 3127.76 3128.45 3128.68  
3131.30 3134.14 3134.60 3137.40 3151.14 3154.69  
3163.90 3166.72 3166.77 3169.83 3171.97 3174.92  
3180.47 3183.18 3183.33 3185.77 3186.02 3186.89  
3187.51 3190.40 3193.60 3193.88 3206.76 3207.39  
3208.06 3209.82 3212.82 3218.91 3222.77 3225.16  
3227.47 3246.16 3254.06

=====

20A

=====

16.78 25.10 26.19 32.11 36.64 43.60  
45.99 52.97 62.46 72.13 80.17 83.95  
94.76 98.15 104.80 106.08 125.63 131.00  
139.34 164.29 169.96 177.75 197.37 208.27  
217.17 226.74 233.95 237.06 250.24 263.08  
269.79 276.26 281.44 302.20 318.39 332.28  
340.13 386.43 405.89 409.29 417.28 433.12  
456.45 461.06 468.54 510.76 518.38 539.08  
542.17 557.71 582.01 617.41 628.13 628.71  
629.61 657.42 677.39 697.76 708.66 710.21  
712.49 721.80 726.01 739.24 764.36 765.85  
770.41 776.09 810.12 812.48 831.70 865.54  
868.49 872.31 926.35 936.90 946.23 949.31  
952.97 986.53 990.40 991.85 994.66 1007.54  
1012.79 1013.33 1014.17 1016.58 1020.58 1023.26  
1023.65 1044.36 1051.31 1052.38 1052.46 1052.53  
1062.46 1075.70 1083.18 1114.57 1116.27 1116.35  
1117.85 1119.02 1121.67 1123.93 1151.41 1173.80  
1176.45 1204.11 1204.94 1205.39 1208.68 1212.52  
1224.60 1228.48 1230.82 1232.34 1234.49 1255.00  
1303.19 1324.61 1326.52 1329.77 1336.79 1349.80  
1366.10 1367.60 1371.24 1396.84 1410.51 1461.92  
1473.75 1474.21 1475.77 1476.52 1478.65 1480.76

1493.06 1500.62 1506.79 1524.86 1525.79 1527.91  
1529.88 1623.81 1626.14 1628.51 1640.08 1643.06  
1643.38 1687.57 1856.41 2264.45 2981.61 2998.84  
3023.82 3034.82 3068.48 3070.96 3083.24 3110.62  
3120.10 3121.24 3135.77 3148.00 3153.42 3171.52  
3192.42 3192.56 3194.41 3199.44 3199.71 3203.10  
3209.56 3209.98 3212.00 3214.00 3215.74 3216.39  
3218.48 3220.02 3220.51

=====

20B

=====

3.79 16.65 19.56 34.54 35.72 40.28  
47.84 53.26 55.74 58.57 71.13 76.53  
90.43 94.88 99.15 101.46 107.78 113.27  
117.27 158.65 161.39 178.66 191.37 202.37  
218.06 226.06 232.91 243.48 251.88 255.96  
265.16 269.37 276.42 295.69 312.80 332.82  
339.16 380.01 407.41 410.73 417.08 437.51  
453.41 457.69 468.45 507.78 518.79 535.77  
540.03 560.52 580.35 616.30 627.15 627.87  
628.77 655.52 676.95 695.91 708.22 708.64  
711.66 719.50 723.23 739.50 765.81 767.21  
769.03 780.19 788.80 815.79 827.43 865.78  
867.09 872.45 930.34 934.42 947.16 948.29  
953.21 985.22 990.28 992.42 995.23 1003.27  
1008.83 1011.31 1014.47 1017.64 1021.98 1023.25  
1023.49 1033.93 1047.94 1049.98 1050.63 1052.54  
1059.05 1070.96 1082.86 1107.68 1114.65 1117.14  
1117.44 1117.82 1120.19 1122.37 1150.29 1174.36  
1179.46 1204.56 1205.15 1205.41 1209.27 1213.68  
1225.73 1227.17 1227.56 1230.18 1247.49 1250.83  
1297.59 1325.37 1327.34 1330.12 1336.42 1350.76  
1367.53 1368.52 1370.68 1398.06 1414.95 1464.09  
1468.75 1474.00 1476.84 1478.05 1479.96 1490.25  
1494.76 1503.33 1509.08 1523.95 1526.15 1526.66  
1529.76 1624.43 1625.14 1627.65 1641.67 1642.06  
1643.23 1697.12 1848.11 2268.25 2985.05 2992.06  
3032.39 3045.30 3060.28 3073.27 3079.16 3118.26  
3118.53 3123.43 3133.42 3157.71 3164.08 3181.95  
3189.60 3190.82 3194.21 3196.70 3196.71 3201.86  
3205.67 3209.27 3211.32 3212.49 3215.55 3217.35  
3217.62 3220.29 3227.91

=====

20A-TS1

=====

-299.82 13.07 22.47 25.76 35.35 37.56  
38.15 42.85 47.90 49.70 60.21 68.05  
73.82 79.88 92.23 113.50 123.72 135.40  
141.62 161.22 171.99 180.12 190.77 197.84  
214.31 228.99 235.05 241.89 250.40 255.15  
268.34 280.17 284.40 292.62 318.51 342.42  
363.73 407.68 407.88 417.48 431.10 444.44  
447.59 460.62 486.39 505.60 518.73 534.92  
543.58 576.17 606.10 629.55 629.95 631.16  
637.58 663.36 679.28 697.44 708.72 711.02  
713.70 722.15 723.61 748.49 763.22 765.01  
770.14 771.61 799.38 834.66 865.81 867.59  
874.02 905.50 942.45 944.80 944.93 948.35  
949.97 975.91 986.86 989.35 992.23 1003.94  
1012.18 1012.25 1012.92 1013.92 1018.35 1020.01  
1021.10 1022.57 1051.71 1052.51 1052.55 1053.45

1058.54 1076.39 1082.10 1113.13 1114.26 1116.48  
1117.49 1120.44 1120.67 1123.44 1142.27 1172.55  
1175.25 1202.93 1203.46 1204.05 1209.57 1212.37  
1223.64 1225.54 1226.80 1237.64 1250.28 1266.28  
1286.00 1321.83 1324.67 1329.97 1335.53 1339.03  
1365.01 1365.74 1367.73 1392.88 1406.95 1463.21  
1473.02 1474.65 1476.91 1477.79 1479.36 1479.98  
1489.71 1493.51 1503.70 1524.98 1526.05 1526.32  
1528.23 1589.30 1624.23 1626.50 1627.73 1641.65  
1642.31 1643.23 1817.78 1969.10 2988.15 2991.18  
3030.29 3044.50 3066.55 3071.67 3078.77 3122.96  
3132.52 3138.92 3151.70 3154.30 3156.73 3161.47  
3183.79 3184.04 3189.15 3191.02 3191.38 3191.72  
3198.60 3199.57 3199.85 3205.14 3206.67 3208.06  
3215.86 3216.14 3217.10

=====

20A-TS2

=====

-218.71 17.41 24.48 31.09 37.77 40.59  
43.96 47.10 51.05 52.83 55.52 64.50  
69.57 87.87 96.09 108.72 124.31 140.50  
150.39 158.79 165.81 194.62 200.43 205.94  
211.90 223.12 231.20 246.74 251.27 259.83  
267.02 275.95 278.55 295.47 335.20 356.94  
406.48 410.20 411.41 415.79 440.78 449.15  
459.30 470.65 488.48 508.04 521.17 535.02  
557.54 600.25 615.77 626.82 629.64 629.80  
668.29 684.13 688.31 696.98 708.86 710.20  
711.26 720.00 725.33 761.27 765.30 766.09  
769.09 773.74 808.92 818.84 856.62 867.11  
868.83 873.56 942.03 944.84 949.95 954.26  
973.26 988.88 990.11 992.56 993.75 997.26  
1007.84 1008.67 1012.90 1013.79 1020.97 1021.69  
1022.30 1037.68 1046.24 1048.85 1051.61 1052.46  
1061.42 1076.10 1090.97 1107.77 1114.85 1116.21  
1117.32 1118.62 1121.91 1122.57 1136.36 1172.61  
1174.14 1203.74 1203.89 1204.49 1206.83 1210.06  
1222.99 1224.01 1224.99 1226.64 1250.10 1263.38  
1287.52 1328.43 1331.41 1332.07 1335.70 1345.60  
1366.62 1366.83 1369.63 1391.35 1403.32 1465.35  
1469.24 1475.66 1477.04 1478.69 1479.56 1480.11  
1493.80 1502.58 1504.56 1524.53 1525.24 1525.39  
1527.32 1625.88 1627.64 1628.42 1642.07 1642.32  
1643.44 1643.64 1791.33 1826.89 2984.57 3003.51  
3016.29 3047.18 3063.38 3073.81 3085.98 3123.23  
3135.16 3140.32 3159.36 3166.20 3178.59 3187.18  
3190.36 3192.71 3192.74 3192.85 3195.67 3200.82  
3201.17 3203.79 3208.86 3209.24 3210.35 3216.46  
3216.69 3217.22 3247.07

=====

20B-TS1

=====

-354.96 15.79 25.15 31.69 38.95 43.91  
45.81 48.82 52.73 60.49 64.52 66.61  
73.20 78.90 90.24 97.73 112.43 129.07  
133.84 149.48 158.81 170.21 185.50 198.24  
206.07 220.54 227.07 229.45 249.56 255.00  
257.79 275.67 278.73 301.23 327.53 356.40  
378.17 407.58 408.99 414.84 429.70 432.66  
443.20 464.08 501.87 517.83 533.28 535.84  
569.27 574.40 601.15 618.83 626.70 629.61

630.89 645.11 679.25 694.22 707.85 711.13  
712.04 719.68 723.51 758.33 762.08 764.37  
769.66 773.13 800.38 828.14 865.13 868.16  
871.56 915.53 941.60 944.19 947.41 948.45  
967.41 971.24 987.11 990.07 991.49 999.50  
1011.07 1012.19 1012.95 1017.61 1019.36 1020.24  
1021.44 1025.78 1048.28 1051.14 1052.73 1053.17  
1057.87 1067.50 1085.92 1114.33 1114.88 1117.37  
1118.32 1121.62 1121.95 1122.74 1141.12 1166.05  
1174.20 1202.60 1202.96 1204.11 1209.12 1210.16  
1222.48 1225.68 1228.36 1234.09 1267.53 1280.42  
1285.35 1318.56 1323.85 1329.55 1334.69 1339.43  
1363.53 1366.76 1368.83 1393.52 1406.90 1470.98  
1473.43 1475.49 1476.05 1476.87 1479.37 1479.88  
1490.72 1494.49 1501.82 1523.27 1525.62 1527.10  
1528.40 1586.91 1624.26 1626.03 1627.77 1641.28  
1641.78 1643.02 1790.23 1881.90 2991.63 2996.26  
3012.30 3038.04 3061.06 3072.95 3084.58 3106.08  
3124.58 3136.80 3154.20 3158.58 3158.97 3180.99  
3184.92 3187.93 3191.51 3193.24 3194.71 3198.38  
3199.42 3201.38 3203.81 3205.42 3207.40 3211.73  
3216.06 3217.23 3218.49

=====

20B-TS2

=====

-217.25 10.19 24.42 26.49 32.65 36.21  
45.67 50.71 54.20 59.35 65.17 68.30  
76.43 84.20 88.08 113.34 120.02 127.85  
152.67 163.59 196.09 199.70 206.32 208.30  
215.31 223.65 228.53 242.66 249.20 265.75  
271.25 274.58 292.75 311.04 323.66 347.50  
369.77 405.22 408.58 413.02 430.96 436.68  
453.73 462.73 481.41 509.48 517.85 531.90  
539.60 556.94 614.24 627.82 629.82 630.14  
668.02 687.09 697.67 707.99 708.50 709.94  
721.16 726.01 729.65 765.17 765.47 769.38  
769.78 790.72 806.90 816.28 860.53 865.35  
869.16 874.77 941.30 942.84 948.77 957.99  
974.21 976.55 987.69 992.12 996.27 997.31  
1006.85 1011.24 1013.78 1014.82 1017.89 1020.93  
1022.37 1041.88 1046.57 1048.89 1050.93 1052.17  
1054.12 1071.96 1089.36 1108.55 1116.08 1116.41  
1118.17 1120.11 1121.11 1122.91 1126.61 1155.36  
1177.57 1203.00 1204.21 1204.57 1206.53 1212.51  
1222.83 1224.47 1226.19 1228.65 1249.34 1279.98  
1287.37 1328.09 1333.61 1333.99 1335.74 1349.70  
1366.49 1369.34 1371.86 1392.84 1411.03 1470.64  
1475.78 1479.36 1479.44 1479.86 1480.49 1493.18  
1495.42 1502.31 1506.59 1525.24 1525.96 1527.19  
1528.02 1626.08 1628.02 1628.55 1642.99 1643.74  
1644.11 1649.97 1793.65 1867.23 2985.50 3009.92  
3021.17 3037.66 3041.11 3069.68 3086.64 3113.85  
3127.23 3131.93 3155.12 3164.17 3169.88 3190.21  
3190.81 3192.27 3192.37 3192.94 3199.03 3200.83  
3201.01 3207.56 3210.31 3210.82 3211.76 3215.62  
3217.32 3218.71 3228.75

=====

21A

=====

22.88 24.13 36.40 41.38 42.26 48.65  
56.63 59.17 63.95 69.08 81.55 84.09

91.47 103.13 107.40 120.70 129.81 142.69  
 155.72 171.04 184.04 194.58 200.73 211.32  
 216.74 223.50 249.87 257.13 261.83 276.14  
 278.62 301.24 314.65 337.89 371.76 405.87  
 406.32 412.31 414.33 431.19 445.35 458.47  
 467.91 490.41 504.82 521.71 527.17 540.87  
 578.77 619.63 627.95 628.49 630.41 640.62  
 696.26 708.03 708.69 710.03 712.84 725.20  
 728.37 757.88 758.98 764.25 767.58 769.21  
 790.26 804.21 866.34 869.22 872.68 905.57  
 918.44 945.68 949.51 951.46 952.41 959.78  
 965.36 989.95 993.10 994.27 1006.03 1009.12  
 1011.14 1013.36 1014.70 1020.83 1023.95 1024.49  
 1026.21 1051.01 1051.81 1052.48 1053.17 1068.74  
 1080.97 1112.51 1113.99 1115.74 1118.42 1120.10  
 1120.85 1121.48 1124.74 1148.08 1170.80 1178.78  
 1204.90 1205.08 1205.56 1216.96 1219.08 1225.78  
 1226.35 1228.48 1241.77 1263.45 1279.50 1287.56  
 1317.35 1325.55 1332.09 1335.89 1339.57 1362.64  
 1367.29 1368.47 1369.61 1404.65 1416.36 1473.76  
 1477.56 1479.47 1480.59 1483.47 1493.48 1495.43  
 1496.94 1503.36 1503.92 1523.27 1524.42 1525.53  
 1527.16 1598.01 1622.51 1627.29 1627.78 1639.33  
 1642.20 1643.62 1652.22 1781.56 2953.06 2983.68  
 3039.33 3056.81 3070.37 3071.42 3093.83 3116.25  
 3133.45 3135.67 3152.64 3168.56 3171.59 3180.77  
 3191.73 3192.53 3192.86 3194.43 3198.73 3201.19  
 3202.95 3206.52 3211.17 3212.53 3214.50 3218.53  
 3218.64 3220.94 3234.17

=====

21B

=====

16.41 19.00 23.44 37.11 40.88 45.11  
 46.03 49.83 56.98 62.31 73.62 82.72  
 93.23 102.08 111.48 124.71 130.81 144.61  
 155.29 159.20 186.28 195.37 201.21 216.76  
 219.67 231.32 246.99 260.76 273.44 276.91  
 291.29 298.52 317.14 340.10 369.28 395.99  
 404.65 408.22 414.19 433.52 448.83 459.00  
 467.79 495.34 508.38 519.85 530.76 541.56  
 608.25 624.73 627.54 628.45 629.81 636.52  
 681.07 698.28 708.88 710.48 711.81 718.75  
 724.26 728.13 757.75 763.28 766.00 767.06  
 784.59 789.80 849.97 865.42 868.84 872.38  
 925.97 944.34 950.60 950.83 952.40 961.49  
 971.12 989.33 991.86 993.18 1003.23 1011.93  
 1012.67 1013.69 1022.41 1023.22 1023.93 1024.63  
 1042.63 1051.24 1052.32 1052.43 1062.05 1070.50  
 1104.57 1115.11 1116.13 1117.90 1120.44 1120.52  
 1122.70 1123.57 1128.97 1152.35 1169.97 1177.41  
 1184.84 1205.12 1205.19 1205.80 1217.02 1224.17  
 1224.39 1225.85 1226.60 1258.48 1281.65 1288.52  
 1318.70 1327.06 1331.66 1336.91 1341.03 1363.82  
 1366.48 1366.78 1368.01 1405.26 1411.12 1463.29  
 1474.99 1478.02 1480.58 1480.69 1484.88 1489.26  
 1494.43 1503.09 1504.33 1524.15 1524.32 1524.94  
 1526.09 1603.65 1625.28 1626.62 1628.17 1640.98  
 1641.45 1641.83 1642.57 1800.27 2948.15 2981.46  
 3045.72 3058.39 3069.49 3072.92 3108.19 3115.69  
 3133.52 3142.99 3147.22 3152.17 3157.49 3167.24  
 3180.07 3187.04 3192.16 3193.05 3194.54 3198.03

3200.50 3203.08 3206.12 3208.73 3211.53 3213.23  
 3217.35 3219.29 3219.76

=====

23A

=====

14.15 22.03 24.76 32.39 39.83 46.87  
 51.26 54.21 59.21 63.97 79.52 86.04  
 88.63 107.51 122.57 139.89 147.86 164.88  
 186.90 194.25 206.14 211.53 219.10 228.82  
 234.94 246.39 250.67 256.23 257.38 258.14  
 279.90 295.92 305.41 323.07 350.63 364.64  
 404.43 404.55 420.32 430.92 440.81 447.29  
 469.21 497.18 514.43 520.45 541.64 567.24  
 620.93 626.24 628.22 629.58 630.63 658.81  
 685.27 687.82 699.85 704.52 707.10 714.29  
 721.34 727.63 753.49 762.10 765.80 768.25  
 774.04 795.16 837.15 858.99 865.47 879.14  
 904.06 942.36 948.80 956.69 962.61 970.92  
 979.03 988.40 991.07 1000.17 1003.86 1009.89  
 1012.32 1014.46 1016.68 1023.62 1023.79 1026.73  
 1035.57 1047.95 1052.58 1053.43 1055.45 1084.24  
 1088.32 1110.97 1113.66 1116.43 1118.24 1119.50  
 1121.34 1124.51 1130.74 1161.97 1177.87 1205.81  
 1206.17 1206.17 1210.38 1214.01 1225.07 1227.06  
 1230.72 1232.58 1248.63 1263.61 1284.69 1290.04  
 1328.89 1330.49 1339.85 1346.74 1352.98 1366.72  
 1368.92 1372.20 1394.44 1405.63 1412.10 1438.17  
 1468.82 1475.85 1476.07 1480.10 1481.90 1493.92  
 1494.71 1504.48 1505.23 1524.50 1525.17 1527.57  
 1529.99 1625.35 1626.86 1629.00 1641.20 1641.53  
 1643.41 1650.95 1670.04 1781.78 2939.87 2966.82  
 2972.81 3032.05 3068.38 3075.50 3093.17 3095.16  
 3104.13 3127.68 3134.78 3147.15 3150.68 3172.48  
 3184.50 3191.23 3191.31 3197.03 3197.26 3197.98  
 3204.89 3205.73 3206.30 3212.26 3213.89 3217.14  
 3219.89 3220.15 3227.33

=====

23B

=====

6.17 22.36 23.22 36.78 44.56 47.98  
 56.60 62.98 75.43 79.39 86.24 97.52  
 106.47 114.29 131.70 145.82 155.90 161.83  
 185.31 193.54 201.70 207.07 215.15 220.10  
 235.34 239.90 250.66 262.01 268.89 273.80  
 285.95 298.77 303.76 330.15 345.09 396.95  
 410.19 414.81 418.70 424.50 432.68 462.44  
 464.31 486.16 508.75 517.22 543.18 584.16  
 589.34 627.39 628.75 630.23 630.97 657.21  
 691.76 697.98 707.71 710.26 712.58 722.30  
 726.51 763.99 767.23 768.29 769.49 777.70  
 791.58 806.59 863.89 868.87 872.04 879.33  
 904.60 947.05 954.29 957.21 964.33 965.80  
 989.18 993.19 994.81 1003.14 1008.48 1013.32  
 1013.83 1015.46 1021.36 1022.13 1022.60 1026.67  
 1030.89 1051.74 1052.59 1054.46 1055.55 1090.02  
 1094.68 1111.14 1112.02 1112.93 1118.08 1119.34  
 1123.59 1123.68 1131.54 1175.00 1205.32 1205.35  
 1206.04 1206.10 1209.99 1212.50 1228.55 1230.68  
 1232.75 1234.27 1251.05 1258.67 1289.09 1325.70  
 1334.03 1336.67 1343.31 1347.36 1368.84 1370.22  
 1371.07 1372.46 1384.92 1407.63 1414.06 1473.59

1478.25 1480.33 1481.23 1485.24 1494.92 1497.66  
1501.85 1505.09 1507.82 1524.19 1525.76 1528.00  
1531.10 1623.79 1625.72 1628.04 1638.98 1641.05  
1642.03 1644.21 1669.46 1679.37 2967.16 2986.06  
3017.38 3033.19 3055.37 3063.78 3076.45 3082.32  
3084.39 3113.31 3118.09 3165.82 3193.32 3193.79  
3195.74 3197.64 3199.53 3201.44 3202.99 3203.29  
3210.10 3212.19 3213.40 3217.53 3219.29 3223.96  
3226.07 3227.94 3228.22

=====

21A-TS

=====

-367.25 22.50 27.39 34.27 38.93 47.42  
48.31 51.59 62.23 65.55 76.66 78.81  
88.22 93.28 103.24 114.83 122.68 139.09  
150.63 159.91 186.89 195.82 204.91 211.49  
220.35 226.91 248.72 252.72 257.91 278.18  
285.97 291.00 312.04 342.30 357.97 389.34  
407.32 410.15 415.28 425.33 439.51 454.40  
459.51 468.27 493.91 501.37 519.03 532.38  
544.41 572.77 624.00 625.09 627.08 630.10  
686.43 706.44 709.22 710.79 712.26 719.87  
730.28 732.32 757.05 765.59 767.38 779.56  
792.94 817.37 855.06 867.13 875.44 885.25  
922.63 925.53 948.13 950.37 955.37 962.11  
986.18 987.28 992.27 997.80 1003.63 1004.71  
1010.03 1010.64 1013.41 1022.03 1023.64 1025.34  
1032.24 1046.91 1048.31 1052.74 1054.14 1078.00  
1085.61 1094.19 1112.72 1114.23 1114.78 1118.59  
1121.06 1125.49 1133.96 1147.31 1179.39 1184.46  
1204.23 1204.38 1205.31 1216.54 1218.39 1219.53  
1219.68 1227.14 1250.10 1254.22 1264.86 1290.56  
1317.97 1321.38 1327.54 1335.06 1341.73 1363.22  
1365.51 1368.64 1369.56 1411.67 1414.67 1465.55  
1471.26 1475.76 1479.15 1479.50 1481.69 1495.61  
1502.91 1503.38 1506.39 1509.86 1522.48 1523.28  
1526.09 1537.09 1601.21 1609.91 1625.83 1627.53  
1633.66 1641.08 1643.11 1784.51 2967.41 3000.32  
3038.03 3038.39 3065.69 3075.17 3091.34 3129.28  
3131.63 3148.82 3150.98 3152.31 3183.51 3184.89  
3187.17 3193.42 3194.81 3195.23 3195.66 3196.12  
3202.39 3204.25 3204.94 3212.59 3213.42 3214.09  
3219.03 3219.49 3221.55

=====

21B-TS

=====

-353.80 19.62 23.30 25.00 36.03 42.34  
52.22 52.67 58.06 64.98 69.65 81.73  
97.25 104.62 119.60 125.83 135.95 155.64  
161.25 186.69 195.63 201.98 213.11 216.15  
221.72 232.88 251.35 257.28 263.79 274.02  
278.10 299.18 318.04 328.51 360.92 384.57  
406.30 407.97 414.65 422.78 430.58 448.91  
453.87 467.87 472.30 499.14 516.37 530.55  
569.38 606.67 614.25 625.06 627.57 629.21  
679.39 687.16 706.03 708.77 711.07 728.70  
730.84 732.26 738.10 758.99 765.01 765.99  
785.30 803.86 846.34 859.34 864.58 873.86  
929.80 937.92 945.33 953.45 954.70 971.76  
987.77 988.04 988.35 996.09 998.73 1004.92  
1012.13 1012.93 1022.19 1023.21 1026.06 1028.37

1036.66 1047.50 1049.38 1052.90 1070.42 1084.30  
1095.30 1098.39 1111.78 1114.52 1118.40 1120.38  
1120.63 1127.04 1134.56 1160.80 1177.78 1186.71  
1194.61 1203.87 1205.19 1205.90 1219.54 1219.61  
1220.16 1225.30 1230.40 1251.32 1290.05 1296.09  
1320.16 1323.39 1330.16 1335.27 1341.11 1363.25  
1367.33 1369.13 1372.69 1411.24 1414.65 1466.45  
1472.31 1475.34 1476.96 1479.20 1481.41 1487.21  
1494.35 1504.63 1508.18 1511.10 1522.45 1523.19  
1524.84 1529.36 1596.75 1602.44 1625.76 1627.02  
1634.89 1641.74 1642.40 1790.63 2966.17 3001.06  
3040.49 3050.75 3068.74 3070.65 3117.10 3121.06  
3128.01 3142.28 3150.89 3161.76 3173.97 3184.84  
3185.92 3186.97 3188.25 3194.59 3196.11 3196.97  
3202.89 3204.19 3204.46 3211.70 3211.94 3212.59  
3218.33 3219.18 3219.52

=====

23A-TS

=====

-338.11 17.31 22.09 25.34 38.05 41.28  
47.48 49.40 50.16 57.72 64.80 75.10  
80.80 88.97 115.72 127.82 133.43 142.89  
154.21 176.90 188.61 194.05 209.02 215.04  
222.41 234.34 239.56 251.13 267.56 270.36  
295.21 298.57 318.67 334.01 347.68 368.29  
404.58 408.10 414.31 421.16 426.49 457.26  
464.65 470.88 501.77 520.48 540.61 545.96  
591.00 623.95 624.70 627.80 628.33 647.03  
689.26 691.19 705.07 706.79 707.77 717.34  
731.22 732.27 753.96 762.94 764.91 768.35  
779.62 826.43 839.75 864.97 866.17 871.50  
916.12 945.65 945.97 951.54 956.29 967.43  
987.07 988.56 993.15 996.42 1008.01 1011.94  
1012.52 1019.81 1021.95 1023.38 1024.93 1028.49  
1039.04 1050.13 1051.23 1051.72 1063.61 1068.21  
1087.35 1105.43 1108.89 1112.32 1115.12 1116.39  
1117.87 1119.79 1128.25 1156.30 1178.13 1186.71  
1204.67 1205.35 1206.78 1208.24 1218.13 1219.60  
1223.29 1223.84 1225.82 1262.69 1272.58 1282.17  
1317.96 1324.17 1333.46 1334.27 1338.98 1365.61  
1366.70 1370.91 1373.00 1396.44 1422.33 1468.03  
1469.95 1473.22 1477.53 1478.02 1480.43 1492.68  
1494.11 1504.17 1505.66 1515.99 1521.55 1522.15  
1524.24 1584.74 1612.52 1623.93 1626.14 1634.35  
1639.14 1642.77 1652.14 1778.82 2750.25 2968.33  
2993.88 3041.00 3067.15 3069.49 3082.61 3123.47  
3128.40 3141.68 3147.83 3149.33 3179.57 3181.93  
3188.84 3189.32 3193.74 3195.56 3198.33 3202.31  
3203.91 3206.18 3209.50 3211.48 3213.63 3213.96  
3218.31 3219.25 3220.62

=====

23B-TS

=====

-355.22 22.08 31.10 36.17 44.42 48.79  
50.10 54.27 61.06 72.26 76.79 82.49  
90.70 98.64 101.99 111.88 126.14 147.09  
156.43 166.07 178.05 196.39 204.42 209.41  
217.12 232.34 233.28 248.58 256.74 269.38  
271.00 305.94 310.36 329.38 339.34 399.37  
407.42 408.03 414.98 424.62 443.00 459.47  
467.41 475.81 501.55 520.00 541.52 545.97

564.85 611.76 624.40 627.75 628.67 663.35  
690.05 691.67 704.89 707.36 710.05 724.85  
731.98 732.89 762.33 768.35 769.83 773.53  
794.01 843.93 863.34 867.99 870.45 877.97  
895.93 935.93 945.40 946.47 952.33 961.79  
966.96 991.21 994.81 1003.60 1007.52 1008.99  
1011.62 1013.32 1013.55 1022.15 1027.69 1028.47  
1038.29 1048.97 1050.20 1051.99 1053.01 1065.50  
1069.24 1105.15 1109.14 1112.79 1116.33 1117.65  
1118.42 1121.41 1126.26 1178.87 1188.32 1193.07  
1204.72 1205.84 1206.94 1211.47 1213.99 1219.34  
1223.46 1225.18 1229.17 1265.84 1273.31 1294.96  
1321.13 1323.77 1333.95 1334.65 1340.12 1366.50  
1370.49 1372.78 1379.97 1397.83 1421.45 1462.94  
1469.50 1478.08 1478.92 1479.27 1485.02 1493.43  
1502.51 1505.92 1507.15 1515.44 1522.64 1522.81  
1525.84 1604.60 1611.17 1624.94 1625.46 1635.06  
1641.09 1642.73 1650.75 1760.57 2743.36 2965.65  
2987.43 3015.36 3033.46 3059.11 3074.10 3082.97  
3122.22 3126.82 3161.18 3186.06 3187.38 3189.02  
3191.54 3195.53 3197.09 3198.34 3198.86 3204.13  
3206.25 3207.16 3211.90 3214.93 3215.80 3218.58  
3220.48 3225.19 3248.42

=====  
22  
=====

18.82 23.71 29.14 38.79 44.22 47.96  
50.50 59.63 62.96 69.58 75.93 83.53  
103.15 118.80 126.42 132.00 151.86 157.44  
173.22 184.85 192.37 198.39 204.74 212.29  
215.43 229.72 247.36 262.63 273.70 294.59  
303.04 325.30 339.60 370.89 403.43 407.24  
409.70 414.25 423.75 433.22 448.50 455.79  
469.22 499.05 510.91 522.87 528.85 578.20  
595.33 624.13 627.04 628.18 629.65 656.64  
682.21 705.15 708.45 709.45 722.30 731.36  
735.93 762.12 765.57 770.29 778.51 811.63  
817.54 863.73 868.29 876.32 900.80 911.92  
936.01 942.17 944.80 954.77 957.36 987.94  
992.41 993.88 998.66 1002.14 1003.17 1012.17  
1013.66 1022.58 1024.72 1026.06 1026.14 1048.46  
1051.63 1052.67 1053.00 1070.97 1083.91 1094.80  
1096.80 1107.07 1111.02 1115.15 1116.66 1118.18  
1122.42 1130.65 1180.04 1183.62 1204.30 1205.19  
1206.66 1212.07 1215.45 1220.74 1221.37 1222.85  
1224.81 1260.39 1266.62 1285.09 1293.72 1317.40  
1322.58 1333.25 1334.72 1347.54 1355.91 1366.11  
1369.66 1370.31 1375.41 1417.83 1420.53 1435.49  
1466.53 1479.02 1479.59 1480.97 1487.84 1495.66  
1498.57 1501.69 1505.12 1510.69 1512.84 1523.56  
1525.63 1529.83 1593.74 1602.87 1626.14 1626.82  
1629.92 1641.92 1642.37 1775.08 2969.49 3009.47  
3018.08 3037.96 3044.75 3055.16 3068.79 3108.02  
3108.69 3116.08 3155.08 3181.52 3183.19 3184.70  
3185.63 3186.53 3190.71 3192.28 3194.80 3197.61  
3198.64 3201.00 3204.76 3206.08 3206.20 3208.67  
3213.87 3214.36 3217.39

=====  
24  
=====

17.88 23.41 34.37 40.29 44.99 48.61

54.65 57.97 65.44 79.01 79.22 82.86  
101.43 121.23 131.38 146.77 159.39 164.82  
182.36 190.32 197.64 199.24 207.54 217.60  
219.90 231.36 249.17 260.77 271.44 296.08  
310.51 315.06 339.35 374.72 402.01 407.81  
410.23 410.89 416.67 423.12 448.18 457.30  
472.42 487.52 499.11 513.31 529.96 593.60  
595.50 623.87 627.52 629.22 640.74 679.66  
688.99 707.22 709.48 710.92 727.70 728.77  
735.23 761.70 766.07 769.36 782.04 788.77  
831.19 866.74 873.45 876.60 888.36 908.14  
923.79 936.41 946.11 955.14 957.64 981.75  
991.09 996.71 998.37 1003.20 1003.60 1012.08  
1013.58 1022.08 1023.70 1025.54 1025.97 1044.70  
1048.65 1051.17 1053.23 1078.91 1089.04 1091.95  
1103.99 1110.48 1112.60 1114.17 1117.98 1120.97  
1130.17 1167.90 1177.59 1182.90 1204.40 1204.60  
1204.90 1209.22 1210.34 1221.65 1222.57 1223.06  
1225.31 1244.06 1264.85 1289.47 1299.05 1318.80  
1324.97 1332.81 1335.65 1347.73 1362.82 1367.66  
1368.06 1370.34 1377.12 1419.27 1429.33 1442.53  
1464.48 1477.47 1479.77 1481.64 1484.23 1494.53  
1502.91 1507.10 1508.28 1510.95 1511.92 1524.24  
1525.28 1531.63 1596.24 1602.62 1626.69 1627.19  
1628.21 1642.07 1642.94 1795.03 2982.41 3016.65  
3017.54 3030.08 3038.16 3048.07 3065.86 3069.87  
3111.58 3115.01 3153.45 3180.21 3185.97 3189.97  
3190.23 3192.43 3195.04 3199.30 3199.43 3202.60  
3205.00 3207.63 3210.37 3210.79 3213.01 3213.76  
3215.85 3218.41 3221.89

=====  
25  
=====

26.69 42.70 71.98 77.02 100.94 114.35  
128.52 141.93 155.16 160.96 166.01 171.99  
181.25 185.58 190.65 200.22 201.47 215.98  
221.78 225.92 232.13 241.80 257.70 262.21  
273.59 278.18 283.90 295.94 331.55 344.07  
346.93 349.31 380.28 417.37 473.95 597.31  
654.13 658.06 665.63 709.99 716.70 719.83  
721.67 723.17 727.33 807.85 812.42 865.06  
867.41 869.38 876.44 894.54 907.38 941.32  
960.78 971.75 971.98 974.38 975.14 975.50  
978.31 995.56 999.32 1030.43 1118.53 1187.39  
1261.22 1292.28 1319.91 1338.78 1342.50 1344.82  
1346.38 1364.16 1370.83 1374.22 1396.86 1452.96  
1461.72 1463.06 1468.93 1469.58 1473.03 1475.62  
1479.27 1480.64 1483.74 1486.64 1487.07 1493.71  
1495.80 1502.99 1599.78 2057.94 2993.84 3035.56  
3061.47 3062.27 3062.40 3062.68 3063.70 3066.32  
3099.39 3100.49 3143.45 3144.34 3145.56 3146.64  
3146.86 3150.10 3160.13 3163.74 3165.53 3167.12  
3171.48 3172.89 3174.36 3174.88 3268.10 3399.51

=====  
26  
=====

19.47 24.26 26.87 46.38 59.75 69.86  
71.24 83.99 86.36 114.13 115.38 119.28  
135.49 140.74 146.18 151.29 163.60 170.90  
173.40 176.96 184.82 191.97 194.58 207.77  
212.34 218.02 229.42 235.57 242.24 259.67

263.87 267.67 277.01 280.12 283.16 305.72  
332.81 346.48 349.34 355.74 366.10 386.62  
434.25 528.74 651.62 654.63 658.11 671.81  
674.29 703.38 717.41 720.69 721.91 724.62  
727.54 810.26 816.71 866.12 868.87 871.68  
882.26 923.25 928.23 950.56 972.74 976.65  
977.87 979.20 982.80 986.44 990.25 998.75  
1016.71 1027.66 1032.94 1035.58 1061.87 1119.52  
1182.35 1247.72 1271.98 1320.79 1337.57 1340.90  
1342.08 1344.38 1362.09 1368.28 1369.98 1417.60  
1426.93 1461.72 1462.98 1469.37 1471.78 1473.73  
1474.33 1474.66 1476.75 1478.79 1480.95 1481.79  
1484.46 1487.16 1496.07 1500.51 1503.72 1524.57  
1730.21 2071.53 2104.01 2973.21 2982.48 3002.94  
3033.56 3046.25 3058.33 3058.89 3060.14 3060.64  
3061.66 3062.22 3116.14 3122.75 3140.41 3142.04  
3142.89 3143.90 3144.82 3150.61 3154.68 3157.59  
3159.43 3162.78 3164.01 3168.20 3172.28 3173.18  
3245.72 3393.57 3408.68

=====

26A

=====

20.74 24.90 33.87 46.02 57.67 68.80  
79.01 86.45 89.71 112.19 115.08 124.19  
139.31 144.40 149.59 155.72 159.90 165.93  
177.18 178.57 186.86 191.33 193.07 204.28  
208.95 215.51 224.86 227.60 232.68 247.61  
260.04 261.77 272.46 275.32 283.39 322.11  
333.12 342.64 348.71 354.20 369.80 387.20  
429.77 515.37 642.13 655.13 658.44 662.36  
666.20 684.40 718.83 720.64 722.09 724.56  
734.45 809.02 815.35 865.28 867.83 872.03  
881.90 919.21 929.00 955.29 971.54 975.14  
976.56 978.30 980.32 986.40 993.08 999.11  
1013.49 1025.81 1031.44 1043.69 1074.76 1122.20  
1184.30 1252.08 1272.41 1321.82 1338.30 1341.18  
1342.43 1345.43 1362.78 1368.66 1369.49 1419.33  
1426.14 1461.75 1462.24 1468.93 1471.84 1474.04  
1474.46 1475.59 1477.41 1479.96 1480.69 1483.89  
1486.71 1492.79 1496.75 1500.04 1505.38 1525.01  
1730.61 2064.31 2111.62 2974.67 2980.73 3006.60  
3032.61 3043.25 3058.08 3059.65 3060.25 3060.33  
3061.38 3061.95 3112.41 3124.63 3141.23 3141.84  
3144.22 3144.50 3145.03 3149.33 3155.95 3157.66  
3160.92 3162.95 3164.73 3165.89 3168.16 3169.30  
3246.62 3398.16 3432.86

=====

26-TS

=====

-398.41 23.55 33.64 36.90 49.65 54.55  
70.64 74.74 79.38 92.82 108.47 120.08  
138.91 146.44 147.85 153.04 157.93 166.89  
179.28 180.57 188.24 196.40 202.11 204.44  
215.80 228.21 239.36 253.18 254.15 258.03  
262.79 268.26 273.48 305.07 326.18 335.58  
345.74 360.45 390.65 420.51 450.85 504.69  
515.62 546.33 655.53 660.15 667.85 692.03  
704.34 722.67 725.39 727.13 727.60 812.14  
814.35 858.96 863.60 868.80 873.68 877.57  
901.02 922.05 938.17 957.51 973.39 976.99  
979.57 981.85 983.22 985.75 992.35 998.30

1004.91 1026.34 1029.43 1037.49 1057.74 1127.79  
1183.23 1247.70 1273.84 1321.50 1336.83 1339.80  
1341.55 1342.05 1361.26 1363.04 1364.53 1411.56  
1420.93 1461.14 1463.21 1470.38 1471.15 1471.65  
1474.74 1475.70 1476.21 1478.81 1479.60 1482.93  
1486.43 1489.33 1490.01 1496.76 1499.49 1523.61  
1729.54 1773.84 1842.88 2957.03 2981.88 2989.78  
3034.23 3050.75 3054.06 3056.26 3056.55 3057.46  
3057.91 3061.99 3124.88 3131.53 3139.70 3140.03  
3141.31 3144.08 3145.91 3145.98 3151.06 3153.79  
3154.85 3155.28 3159.34 3161.08 3162.79 3167.58  
3246.13 3286.93 3292.50

=====

26A-TS

=====

-366.10 17.05 30.84 35.47 48.71 54.61  
63.58 76.12 78.05 93.03 104.83 117.44  
127.35 141.03 144.84 150.55 156.37 167.44  
176.75 182.71 189.75 194.61 198.70 205.00  
209.43 223.89 225.62 240.53 256.48 261.15  
263.80 267.46 273.15 322.98 329.66 337.22  
350.49 369.29 390.72 425.77 448.64 498.75  
504.53 555.21 654.53 658.13 660.44 675.00  
686.57 721.93 724.85 726.93 727.50 812.08  
814.38 863.75 866.36 872.91 876.05 893.98  
935.17 946.83 965.83 973.58 977.55 978.97  
981.47 983.08 984.02 987.15 996.30 999.46  
1018.18 1026.71 1035.40 1038.29 1065.50 1126.72  
1182.89 1247.96 1274.20 1322.03 1335.94 1339.36  
1340.96 1343.40 1360.60 1364.11 1364.81 1412.76  
1421.84 1461.79 1462.97 1470.46 1471.73 1472.08  
1473.82 1474.52 1479.13 1479.76 1481.87 1483.70  
1486.50 1490.09 1492.53 1495.87 1501.91 1523.77  
1730.04 1764.73 1831.51 2959.08 2982.80 2991.66  
3035.73 3046.08 3054.00 3056.98 3057.59 3057.84  
3059.97 3063.00 3110.45 3121.82 3139.22 3139.98  
3141.19 3143.65 3147.05 3148.01 3152.55 3154.86  
3155.22 3159.65 3160.56 3162.68 3165.46 3166.80  
3246.52 3293.24 3298.63

=====

27

=====

14.47 25.73 38.19 47.45 58.47 64.04  
70.18 75.83 86.55 105.49 129.80 134.18  
145.26 161.73 162.89 169.93 179.86 183.62  
187.79 193.40 196.38 201.32 205.01 215.77  
222.76 227.78 232.19 246.35 248.77 252.96  
258.40 259.76 322.30 325.77 331.54 365.87  
377.69 435.43 470.68 545.55 571.24 596.52  
654.33 656.76 670.25 687.20 726.45 729.29  
733.62 733.88 738.05 812.82 815.90 848.27  
860.26 865.53 872.33 876.99 919.81 939.20  
977.35 979.80 981.42 982.11 983.70 984.06  
986.38 993.32 997.31 1011.65 1023.01 1031.42  
1054.25 1086.75 1106.00 1139.80 1181.59 1205.72  
1238.22 1271.54 1322.01 1337.83 1340.14 1341.29  
1342.27 1343.73 1361.06 1364.32 1370.47 1421.99  
1425.42 1460.48 1460.91 1468.54 1468.90 1471.71  
1472.36 1473.47 1476.50 1477.40 1480.25 1481.47  
1488.69 1490.92 1494.15 1496.36 1501.04 1523.44  
1600.79 1668.20 1727.58 2946.07 2985.30 2986.47

3026.36 3036.90 3053.56 3055.40 3056.06 3056.33  
3063.41 3065.36 3092.04 3129.91 3137.04 3139.77  
3140.81 3143.12 3146.65 3149.25 3150.68 3151.70  
3152.91 3154.47 3155.84 3157.64 3158.77 3162.60  
3164.12 3172.11 3246.05

=====

28

=====

15.80 25.33 39.59 45.49 62.75 67.44  
79.34 89.66 100.10 108.83 127.07 137.00  
142.90 153.15 160.03 164.69 169.04 176.85  
182.40 192.86 196.69 203.66 206.56 216.02  
224.63 227.18 239.54 248.92 252.27 258.92  
261.97 275.83 321.00 325.92 331.91 392.47  
397.65 439.24 485.68 504.16 530.53 549.09  
654.57 656.79 668.35 706.33 724.74 727.98  
733.32 735.69 810.24 813.05 815.88 861.15  
865.47 871.19 872.71 877.31 932.19 945.29  
976.98 978.58 980.90 982.15 982.97 983.79  
986.79 995.03 997.50 1017.29 1031.59 1047.97  
1049.18 1095.65 1108.90 1134.41 1181.85 1225.10  
1258.91 1271.80 1317.44 1321.73 1339.07 1340.55  
1342.59 1343.68 1361.59 1364.21 1366.58 1413.70  
1420.18 1459.41 1461.40 1465.27 1468.15 1469.92  
1472.72 1473.41 1473.98 1475.73 1478.03 1480.81  
1482.40 1487.76 1492.42 1496.77 1506.09 1523.86  
1626.64 1669.59 1727.40 2947.61 2986.25 2989.85  
3021.43 3028.17 3053.20 3054.24 3055.91 3056.15  
3061.87 3063.22 3079.40 3091.20 3137.18 3138.67  
3139.90 3141.40 3150.85 3151.34 3151.66 3152.56  
3153.53 3153.59 3155.31 3155.61 3162.06 3163.88  
3165.47 3168.75 3244.48

=====

8A-TS1'

=====

-134.01 11.08 21.84 24.56 29.58 34.02  
37.47 44.25 47.10 50.27 53.85 57.29  
60.55 64.08 65.46 68.73 70.76 72.98  
73.65 79.02 83.83 86.98 88.91 94.05  
96.65 104.27 115.19 121.19 127.64 134.13  
145.23 149.37 157.66 168.02 177.72 188.25  
206.98 208.69 211.94 219.27 221.52 228.58  
230.99 236.51 253.60 254.75 258.26 259.85  
267.30 267.86 275.07 277.05 281.60 303.31  
327.51 336.87 365.72 392.18 406.74 408.56  
410.44 414.72 418.64 421.63 423.53 426.15  
433.52 435.12 438.59 467.59 470.22 498.70  
501.71 503.33 516.73 520.83 530.34 533.98  
535.06 549.62 560.61 584.09 618.39 625.78  
627.41 629.25 629.64 630.52 631.04 632.38  
632.71 674.19 683.05 690.86 694.30 702.55  
705.23 706.71 708.35 710.47 710.89 713.73  
714.54 717.74 719.68 720.94 749.81 758.29  
761.41 765.38 766.47 767.68 768.98 771.47  
777.74 798.23 820.55 859.69 861.24 863.18  
867.56 869.87 872.67 880.89 881.20 904.26  
937.37 940.18 940.71 943.47 944.96 948.36  
956.90 961.08 981.26 983.17 983.76 988.22  
988.76 989.78 992.33 1002.31 1007.15 1010.80  
1011.12 1011.92 1012.26 1012.86 1013.15 1014.66  
1015.02 1015.08 1016.48 1017.42 1019.28 1020.16

1021.67 1022.52 1026.48 1047.07 1051.94 1052.50  
1053.07 1054.05 1055.03 1057.27 1062.93 1081.06  
1107.43 1109.69 1110.56 1113.97 1115.70 1116.11  
1117.85 1118.49 1119.02 1120.30 1120.41 1120.76  
1122.08 1124.91 1141.03 1167.06 1180.74 1196.18  
1199.62 1201.82 1201.94 1202.18 1203.07 1203.18  
1203.22 1210.84 1219.12 1221.63 1225.34 1226.57  
1228.44 1229.88 1230.31 1235.86 1236.93 1260.28  
1283.02 1291.61 1323.75 1323.79 1327.79 1328.82  
1331.35 1335.25 1336.28 1337.11 1351.59 1362.93  
1365.36 1366.71 1367.74 1368.63 1368.67 1374.29  
1396.60 1473.25 1474.39 1475.45 1475.63 1479.10  
1479.82 1480.47 1481.50 1486.28 1495.58 1505.76  
1506.06 1523.98 1526.10 1526.60 1527.41 1527.54  
1527.91 1528.21 1531.42 1620.25 1624.50 1626.38  
1627.42 1628.56 1628.68 1630.86 1642.85 1643.76  
1644.57 1645.20 1645.66 1647.18 1647.45 1659.37  
1797.11 1975.27 2979.67 3020.27 3028.99 3056.20  
3068.57 3102.40 3118.58 3152.51 3153.88 3158.31  
3162.01 3183.51 3183.57 3183.70 3186.28 3186.48  
3187.34 3187.51 3188.60 3189.74 3191.99 3193.54  
3194.20 3194.30 3194.57 3196.32 3198.82 3199.38  
3201.78 3204.31 3205.45 3206.30 3208.93 3209.58  
3211.07 3212.55 3212.83 3213.73 3217.18 3224.89  
3226.32 3228.03 3235.15 3240.96 3251.46 3268.52

=====

8B-TS1'

=====

-128.62 5.02 11.65 18.07 23.38 31.38  
36.49 41.14 43.62 46.83 51.09 53.01  
55.96 57.02 61.09 63.69 65.42 70.23  
74.77 83.25 85.95 91.16 95.03 98.86  
104.33 108.53 111.53 120.50 128.36 137.19  
140.27 143.18 152.42 162.58 172.51 194.54  
199.75 206.80 217.79 221.65 226.21 229.28  
232.95 240.99 247.65 253.33 256.04 258.30  
263.67 266.58 279.10 281.23 284.18 290.30  
306.07 358.46 366.26 405.15 406.42 409.44  
412.23 414.68 421.67 422.61 424.33 428.50  
435.10 435.91 439.79 464.90 468.01 501.90  
506.54 516.13 518.76 528.66 533.04 535.53  
539.29 567.79 574.24 601.89 613.77 628.28  
629.69 629.94 631.22 631.72 632.22 633.80  
641.18 675.30 683.99 695.29 696.93 700.84  
705.64 707.11 708.48 711.65 712.04 713.47  
716.18 718.21 723.05 723.82 739.51 758.29  
759.31 761.22 763.70 764.68 766.99 768.37  
779.93 799.12 815.74 856.21 859.28 862.83  
864.31 867.58 875.06 876.21 888.79 910.85  
936.65 939.68 941.31 943.53 944.60 946.56  
950.74 954.01 979.32 980.93 981.34 982.90  
984.87 987.57 992.07 995.59 1007.31 1008.55  
1009.92 1012.05 1012.63 1012.89 1013.24 1013.78  
1015.19 1015.77 1016.92 1017.00 1017.45 1018.05  
1019.51 1020.77 1029.06 1051.51 1052.27 1053.08  
1053.50 1054.02 1054.27 1054.89 1058.10 1083.32  
1110.36 1111.53 1113.21 1113.92 1114.27 1114.83  
1116.99 1118.24 1118.62 1119.03 1120.71 1121.76  
1122.26 1122.47 1133.56 1162.02 1177.35 1200.00  
1200.63 1201.34 1201.51 1202.10 1203.18 1203.29  
1203.53 1208.14 1217.61 1221.87 1221.99 1226.52

1228.79 1230.09 1230.54 1231.05 1233.44 1254.38  
 1287.54 1313.44 1324.43 1325.45 1327.09 1330.47  
 1332.24 1337.23 1337.84 1338.85 1347.10 1364.13  
 1364.43 1367.56 1369.69 1369.76 1371.24 1372.62  
 1395.76 1473.24 1474.77 1476.21 1477.54 1478.11  
 1481.32 1481.49 1481.81 1484.31 1492.73 1505.06  
 1505.67 1525.64 1526.30 1527.14 1528.12 1528.34  
 1528.81 1529.22 1531.99 1623.91 1625.99 1626.41  
 1626.54 1629.75 1631.52 1631.75 1643.17 1644.85  
 1645.49 1646.57 1647.64 1648.20 1650.84 1662.22  
 1763.51 1865.37 2985.24 3009.74 3031.69 3064.26  
 3080.80 3105.47 3121.64 3145.94 3178.20 3179.92  
 3181.50 3183.74 3183.85 3184.39 3185.78 3186.79  
 3187.41 3189.42 3189.45 3191.36 3192.39 3192.53  
 3193.31 3197.01 3199.33 3199.85 3199.88 3201.74  
 3204.73 3206.22 3208.81 3209.37 3209.77 3210.98  
 3211.54 3213.14 3213.23 3215.00 3216.32 3216.78  
 3219.19 3224.86 3226.90 3236.28 3240.62 3245.19

=====

8A-TS1"

=====

-163.91 11.82 25.10 30.30 32.42 37.72  
 44.09 45.55 47.96 51.93 55.08 56.81  
 60.77 62.26 66.83 68.93 73.12 75.86  
 78.06 79.20 87.10 89.61 95.09 98.44  
 101.44 108.52 111.93 125.13 135.90 142.14  
 148.86 162.78 168.47 178.05 195.58 200.85  
 207.87 209.64 214.82 220.94 223.96 230.44  
 239.44 242.14 251.51 256.78 258.43 260.64  
 267.51 272.44 273.93 274.94 282.91 283.41  
 302.25 330.98 335.72 346.02 381.76 406.66  
 408.36 410.08 416.55 420.86 424.11 425.47  
 433.06 435.14 440.34 458.97 468.98 471.47  
 499.35 503.85 517.78 518.66 526.90 531.54  
 534.67 545.90 552.50 568.07 616.94 626.86  
 628.29 629.76 630.90 631.65 633.03 633.51  
 675.79 692.43 694.31 696.23 705.64 706.83  
 709.49 711.44 712.47 713.45 714.75 717.00  
 720.95 724.62 751.48 758.23 761.43 765.27  
 766.16 768.05 770.31 772.15 803.15 819.00  
 860.55 864.80 866.27 870.30 871.25 875.42  
 881.41 885.03 932.63 935.77 941.86 943.57  
 944.68 945.75 949.02 954.80 960.92 973.30  
 981.13 982.35 986.14 988.60 989.78 991.52  
 1001.02 1008.46 1011.80 1012.38 1012.80 1014.05  
 1014.08 1015.02 1015.99 1016.59 1017.87 1019.05  
 1020.80 1022.31 1022.85 1043.33 1049.05 1052.04  
 1052.98 1053.68 1054.57 1055.65 1062.78 1082.27  
 1107.52 1109.47 1111.42 1115.25 1115.31 1116.68  
 1116.85 1117.68 1119.36 1120.20 1120.67 1121.58  
 1123.23 1124.95 1135.57 1140.58 1165.58 1181.21  
 1191.55 1200.76 1202.18 1202.31 1203.09 1203.43  
 1204.08 1208.46 1220.01 1221.86 1226.80 1226.99  
 1229.96 1230.57 1235.53 1237.24 1258.95 1264.54  
 1290.25 1322.42 1322.76 1324.85 1327.53 1329.67  
 1331.82 1335.47 1337.31 1347.59 1350.63 1363.63  
 1365.92 1366.56 1368.87 1369.90 1374.92 1396.79  
 1414.19 1436.15 1473.95 1474.57 1476.18 1476.53  
 1479.95 1480.18 1480.60 1487.62 1497.13 1498.24  
 1503.65 1503.93 1506.36 1512.52 1525.21 1525.22  
 1526.45 1526.80 1527.81 1528.33 1528.87 1531.62

1626.51 1627.13 1627.96 1628.44 1629.91 1630.55  
 1644.49 1644.92 1645.44 1645.56 1646.51 1647.17  
 1664.47 1791.56 1972.17 2981.52 3022.22 3029.35  
 3050.76 3055.91 3058.90 3065.15 3068.75 3109.22  
 3119.32 3127.14 3132.66 3142.78 3146.32 3154.26  
 3155.03 3159.19 3179.16 3180.87 3183.65 3184.27  
 3186.69 3187.12 3187.63 3189.04 3189.66 3193.15  
 3194.08 3195.44 3196.11 3198.51 3198.76 3202.12  
 3202.43 3205.71 3206.16 3206.94 3209.54 3211.60  
 3212.12 3213.58 3214.46 3218.20 3222.79 3228.95  
 3236.64 3259.40 3271.74

=====

8B-TS1"

=====

-51.77 15.44 19.09 30.35 34.67 36.73  
 44.22 45.09 48.59 50.46 53.08 55.93  
 56.92 58.51 61.95 65.11 68.21 75.89  
 79.39 82.77 90.69 94.37 96.93 99.87  
 100.99 111.40 113.94 119.40 133.52 139.04  
 140.23 145.63 150.90 163.42 177.60 198.91  
 206.15 209.34 215.74 225.85 229.18 230.79  
 235.77 243.85 253.20 255.79 257.17 262.52  
 263.77 270.00 278.40 281.73 282.94 289.53  
 304.48 309.68 331.52 361.30 399.79 408.24  
 410.75 413.18 413.99 420.79 423.21 427.60  
 433.87 439.41 440.98 463.88 466.96 469.67  
 503.63 508.29 515.25 519.02 526.88 533.40  
 535.01 558.95 565.26 595.26 613.75 626.18  
 627.89 629.68 630.28 631.22 631.57 633.60  
 673.95 680.83 696.23 698.45 707.09 707.57  
 711.48 713.00 714.21 714.34 716.20 717.82  
 720.90 721.74 746.69 761.58 763.11 763.73  
 764.71 766.20 767.79 770.36 809.40 820.33  
 862.47 864.76 867.46 871.16 874.63 875.71  
 877.23 879.44 937.25 939.31 942.79 944.29  
 944.43 946.23 950.37 953.57 958.01 974.73  
 981.86 984.42 986.03 988.17 991.45 992.17  
 995.92 1010.39 1011.85 1012.71 1013.10 1013.56  
 1013.87 1014.95 1016.18 1016.68 1017.15 1017.38  
 1018.36 1020.23 1021.54 1041.88 1050.49 1051.57  
 1052.32 1052.47 1053.24 1053.91 1060.49 1083.48  
 1106.22 1110.56 1113.46 1114.35 1115.18 1116.19  
 1116.90 1117.68 1117.96 1118.65 1119.98 1120.02  
 1121.68 1122.60 1142.20 1144.43 1162.15 1177.95  
 1192.19 1200.55 1200.93 1201.30 1202.04 1203.00  
 1203.56 1207.99 1216.02 1222.42 1222.84 1226.67  
 1227.11 1230.11 1230.76 1231.05 1253.98 1287.71  
 1294.75 1324.38 1325.06 1327.79 1329.52 1333.77  
 1337.54 1338.72 1342.80 1350.04 1355.21 1364.61  
 1365.10 1367.62 1367.87 1369.46 1371.30 1396.03  
 1411.58 1432.90 1472.68 1473.86 1477.04 1477.25  
 1479.26 1480.09 1481.00 1481.28 1495.28 1498.20  
 1505.30 1506.41 1507.60 1514.04 1525.45 1526.10  
 1527.00 1527.38 1527.79 1528.15 1528.54 1528.87  
 1623.86 1626.58 1628.04 1629.21 1631.28 1631.64  
 1642.02 1644.73 1644.88 1645.94 1647.17 1648.14  
 1679.31 1782.16 1934.68 2990.03 3009.38 3039.98  
 3047.40 3050.10 3065.94 3078.23 3106.02 3119.90  
 3121.70 3126.07 3130.60 3134.61 3149.09 3152.87  
 3179.52 3179.85 3180.52 3184.03 3184.37 3185.16  
 3185.37 3186.86 3188.86 3189.86 3189.90 3191.06



3193.26 3194.43 3197.42 3198.99 3199.92 3200.85  
3202.70 3206.20 3208.48 3210.28 3211.30 3211.59  
3211.83 3214.10 3214.72 3216.24 3216.97 3218.35  
3219.23 3223.67 3255.31

=====

15A-TS1'

=====

-248.14 5.57 13.10 15.54 23.41 26.68  
30.25 32.32 34.38 36.87 41.05 42.34  
44.69 45.41 47.88 50.24 51.07 53.40  
58.64 63.34 64.26 69.20 72.20 76.67  
78.60 87.25 90.05 94.38 96.25 101.20  
108.20 109.68 110.71 122.77 123.70 128.71  
131.43 141.10 143.84 151.44 158.83 162.51  
162.84 166.13 172.08 174.68 178.45 181.93  
185.76 190.48 192.68 196.52 197.25 201.24  
208.48 210.38 218.72 221.93 226.60 230.39  
236.01 238.46 242.47 244.21 253.99 259.71  
264.14 269.83 270.99 280.18 286.50 286.61  
292.17 295.59 300.12 309.54 324.27 331.34  
337.90 344.34 375.58 396.39 401.48 412.66  
417.15 418.93 423.49 437.08 443.00 444.59  
448.57 459.30 467.98 484.25 485.65 489.91  
496.76 499.23 516.87 519.05 519.56 522.73  
524.42 525.11 525.33 528.02 531.66 532.67  
533.86 538.11 540.17 540.51 544.78 545.82  
552.29 557.58 560.44 563.08 565.16 569.07  
574.55 583.15 598.62 611.02 618.55 621.10  
631.43 632.89 639.43 659.22 677.71 683.08  
685.00 688.49 703.23 705.84 711.11 713.67  
714.71 718.25 756.91 768.36 769.37 779.11  
780.67 792.05 802.51 808.04 814.90 830.49  
840.66 841.92 853.92 856.96 860.23 862.48  
862.85 867.49 871.23 873.59 877.56 878.57  
880.29 891.55 893.15 895.30 895.77 897.95  
909.49 916.06 919.02 921.74 931.35 934.18  
936.93 939.50 947.93 958.18 960.40 962.52  
964.08 967.20 968.46 972.64 974.80 983.00  
993.35 997.34 1004.95 1007.60 1008.27 1009.82  
1011.08 1011.79 1012.12 1013.36 1013.92 1016.77  
1023.54 1024.21 1025.56 1027.10 1027.80 1033.28  
1041.69 1046.13 1047.73 1050.98 1054.12 1058.72  
1061.07 1063.40 1064.48 1065.41 1066.37 1066.97  
1067.59 1067.78 1069.14 1069.48 1076.60 1088.20  
1115.19 1131.39 1140.38 1150.15 1159.51 1161.10  
1163.68 1166.40 1173.26 1174.50 1176.41 1180.05  
1188.66 1190.69 1196.03 1200.23 1201.88 1203.15  
1204.58 1206.43 1206.58 1208.01 1213.43 1215.44  
1218.70 1225.92 1241.12 1247.52 1256.45 1259.91  
1276.35 1286.88 1289.42 1290.70 1294.53 1297.29  
1302.75 1303.95 1316.63 1317.98 1321.24 1325.21  
1326.08 1333.86 1337.88 1339.96 1349.67 1355.50  
1359.81 1360.94 1362.35 1370.22 1396.80 1398.49  
1406.62 1410.33 1426.37 1427.85 1428.79 1429.19  
1429.97 1430.40 1430.89 1431.51 1434.47 1455.59  
1458.49 1461.46 1462.33 1463.64 1464.15 1464.82  
1465.99 1467.98 1469.94 1480.11 1482.04 1494.07  
1494.30 1495.69 1496.51 1497.48 1499.99 1500.35  
1500.51 1501.80 1504.42 1504.46 1505.26 1509.85  
1510.37 1511.08 1512.21 1513.98 1514.45 1519.70  
1521.50 1525.11 1525.20 1526.33 1533.45 1548.42

1552.91 1595.93 1610.65 1623.91 1633.55 1634.57  
1637.96 1638.11 1644.46 1646.54 1647.15 1647.79  
1648.19 1649.28 1650.33 1650.61 1671.84 1674.04  
1770.97 1926.38 2956.95 2991.84 3007.59 3035.04  
3036.48 3040.07 3040.46 3040.87 3041.07 3041.42  
3042.25 3042.44 3067.23 3098.01 3100.09 3100.84  
3101.06 3102.72 3104.10 3104.33 3104.51 3110.43  
3111.52 3124.61 3125.78 3128.36 3131.38 3131.84  
3132.20 3132.52 3135.21 3152.63 3161.50 3165.14  
3167.42 3168.25 3174.92 3177.18 3180.20 3181.58  
3182.02 3182.11 3184.43 3185.63 3186.05 3191.89  
3192.14 3192.27 3192.79 3195.55 3196.62 3201.17  
3207.02 3207.44 3207.56 3207.92 3216.24 3218.10  
3220.33 3220.68 3224.48 3224.61 3230.12 3231.59

=====

15B-TS1'

=====

-304.40 7.43 11.31 15.09 18.54 22.66  
26.22 29.73 31.25 35.01 37.57 41.62  
44.10 46.61 47.48 49.97 51.34 53.78  
56.33 59.71 66.25 68.40 70.07 73.26  
75.90 79.99 82.49 85.71 91.29 94.39  
97.85 102.18 105.73 108.66 110.66 127.23  
129.25 135.60 142.27 148.41 150.23 150.95  
159.15 164.65 166.35 173.78 176.77 179.89  
184.33 185.98 187.77 192.09 197.98 202.03  
203.62 205.08 211.73 216.40 222.91 226.07  
232.66 233.48 236.68 241.92 249.90 252.84  
256.48 259.42 268.80 273.96 283.34 288.12  
289.85 292.87 301.06 307.56 310.39 323.13  
334.70 345.59 368.32 394.59 398.88 413.25  
414.20 417.96 432.22 436.50 442.51 446.73  
449.38 458.29 463.61 480.40 485.87 493.35  
495.18 499.19 510.36 519.04 520.54 521.26  
522.70 523.65 524.45 526.78 529.00 529.78  
530.50 532.57 535.74 544.72 549.21 552.02  
553.30 553.75 560.24 562.45 564.19 566.74  
568.15 578.85 595.98 597.72 614.21 620.44  
626.39 635.31 638.48 657.65 669.30 679.20  
684.53 691.06 701.97 705.74 707.94 710.21  
713.38 716.12 754.80 763.45 768.62 776.10  
777.16 787.80 789.65 803.45 814.06 832.52  
841.09 842.49 852.21 855.32 861.72 862.24  
863.43 866.66 871.22 873.21 873.51 876.42  
880.70 883.39 889.12 894.77 900.93 901.96  
906.06 907.39 910.97 921.10 923.25 928.55  
933.39 935.38 940.78 942.77 957.74 959.76  
962.64 964.11 969.34 969.91 972.14 984.65  
992.88 993.39 1003.39 1004.04 1005.09 1005.99  
1008.29 1008.81 1011.83 1012.83 1013.15 1014.48  
1024.27 1024.48 1024.81 1025.23 1026.80 1032.52  
1043.40 1044.27 1048.14 1048.61 1055.59 1057.73  
1058.27 1065.20 1065.41 1065.54 1066.65 1069.05  
1069.29 1070.02 1070.70 1071.06 1075.98 1095.22  
1116.11 1138.26 1140.76 1155.89 1156.68 1159.57  
1165.26 1166.84 1167.30 1173.99 1175.57 1176.26  
1187.62 1198.51 1199.36 1200.39 1202.62 1203.69  
1204.38 1206.10 1206.96 1210.40 1214.83 1217.60  
1221.77 1227.79 1242.89 1255.71 1256.49 1259.09  
1280.31 1286.98 1288.67 1288.96 1289.59 1295.19  
1300.92 1307.87 1317.66 1320.24 1322.04 1326.77

1327.42 1330.65 1346.01 1351.08 1351.22 1358.67  
1359.25 1362.37 1364.11 1365.02 1386.40 1395.33  
1408.14 1409.24 1425.30 1427.02 1427.35 1429.56  
1429.73 1430.35 1430.79 1431.86 1431.95 1453.25  
1459.25 1460.71 1462.35 1463.09 1464.98 1465.41  
1465.76 1466.08 1468.40 1479.56 1480.76 1493.37  
1494.94 1495.63 1497.04 1497.55 1498.31 1499.13  
1499.57 1501.20 1501.87 1503.09 1504.56 1505.71  
1507.78 1509.85 1511.26 1512.31 1512.64 1520.12  
1520.55 1521.91 1522.71 1527.04 1529.73 1548.21  
1551.49 1594.68 1602.36 1619.91 1634.83 1635.31  
1635.87 1636.86 1638.20 1639.06 1648.35 1648.99  
1649.77 1651.28 1652.57 1653.95 1671.31 1672.68  
1777.66 1863.85 2968.24 2984.33 3006.33 3026.08  
3038.69 3039.61 3039.95 3040.25 3040.99 3043.94  
3049.67 3064.43 3068.98 3093.60 3098.96 3099.39  
3099.59 3101.85 3104.91 3109.35 3111.16 3113.22  
3116.10 3123.26 3124.20 3125.78 3126.55 3127.38  
3127.76 3129.90 3136.57 3145.16 3166.34 3169.65  
3170.51 3172.52 3178.98 3179.90 3180.15 3182.22  
3182.62 3183.38 3184.01 3184.38 3187.31 3190.42  
3191.12 3191.19 3191.83 3192.92 3193.51 3193.97  
3203.32 3203.79 3206.07 3206.61 3211.26 3214.48  
3215.60 3226.85 3227.08 3228.61 3235.00 3257.41

=====  
15A-TS1"  
=====

-249.25 3.36 8.71 12.01 22.48 25.43  
29.60 32.07 33.96 35.53 37.98 42.67  
45.52 47.78 49.54 52.57 55.33 56.31  
57.30 59.90 64.37 66.11 71.87 74.69  
87.19 90.61 96.84 97.97 103.49 106.02  
108.48 110.27 113.38 116.67 127.82 133.94  
140.81 143.76 154.19 157.20 160.64 164.77  
167.08 170.49 171.89 176.68 185.58 188.04  
191.40 193.07 195.33 196.33 199.61 206.01  
210.33 217.85 220.55 222.63 231.91 232.08  
235.11 242.87 245.56 248.13 253.81 257.99  
260.09 264.40 271.55 280.05 281.74 286.41  
286.57 291.36 293.86 299.89 309.04 324.07  
327.25 333.51 344.79 352.03 383.26 395.56  
399.47 412.17 418.20 436.76 443.62 446.27  
448.91 458.76 466.66 483.01 485.92 486.60  
489.36 498.01 499.88 515.63 517.17 519.56  
520.63 522.85 524.89 526.36 527.13 530.90  
532.00 532.94 539.73 541.76 545.18 546.69  
552.88 557.28 559.23 562.73 563.80 568.06  
574.22 579.65 584.74 598.32 617.80 619.47  
628.85 637.18 658.47 682.16 683.19 684.61  
686.56 704.08 708.43 713.70 714.67 718.32  
759.53 767.93 768.73 777.41 787.48 803.46  
804.05 810.78 830.61 839.81 840.27 853.63  
855.23 860.80 863.23 865.68 871.58 872.72  
876.42 878.30 879.02 881.07 891.07 891.90  
896.01 899.22 900.82 909.85 916.25 919.73  
931.97 934.66 936.39 939.03 942.79 952.32  
957.24 959.47 960.84 963.38 967.02 968.49  
972.22 972.84 975.79 992.70 993.92 1005.53  
1007.83 1008.12 1009.99 1010.35 1011.52 1012.48  
1013.91 1023.88 1024.52 1025.55 1026.82 1030.61  
1036.62 1042.29 1046.33 1047.66 1050.44 1055.64

1058.96 1063.63 1064.39 1065.43 1066.25 1066.74  
1067.73 1067.87 1068.99 1069.43 1077.01 1087.09  
1122.78 1130.45 1132.59 1142.09 1149.82 1159.54  
1161.46 1164.85 1167.51 1172.53 1174.36 1176.36  
1180.12 1188.58 1191.60 1198.70 1201.85 1203.55  
1204.91 1207.66 1207.71 1208.25 1214.17 1215.22  
1218.08 1240.47 1245.68 1255.41 1258.93 1259.81  
1288.07 1289.11 1291.33 1294.54 1296.08 1301.65  
1303.69 1316.63 1316.99 1319.18 1321.30 1325.38  
1325.89 1339.03 1341.20 1349.95 1356.47 1359.79  
1360.56 1362.74 1370.45 1396.80 1397.61 1405.35  
1409.98 1412.96 1426.15 1427.88 1428.82 1429.17  
1429.88 1430.36 1430.95 1431.62 1434.50 1434.95  
1456.13 1458.87 1461.66 1462.19 1462.77 1464.34  
1465.14 1466.13 1467.80 1469.92 1479.44 1494.19  
1494.27 1495.62 1496.48 1497.42 1499.36 1499.42  
1499.80 1500.07 1502.90 1503.20 1503.30 1504.44  
1505.68 1509.51 1510.52 1511.13 1511.81 1513.54  
1513.82 1514.48 1520.02 1521.36 1523.58 1524.94  
1527.11 1532.90 1548.73 1551.84 1597.42 1610.55  
1635.39 1635.50 1637.80 1638.23 1643.38 1646.50  
1648.82 1648.97 1650.17 1650.85 1655.69 1670.47  
1673.95 1770.45 1921.11 2955.03 2990.27 3010.12  
3036.04 3039.63 3040.46 3040.75 3041.10 3041.29  
3041.37 3041.59 3042.69 3049.86 3053.03 3067.25  
3068.04 3098.14 3099.64 3101.15 3101.23 3102.80  
3103.73 3103.73 3104.74 3111.18 3115.35 3124.67  
3125.10 3125.75 3127.53 3128.15 3128.46 3130.57  
3130.64 3132.18 3135.02 3138.33 3153.46 3154.71  
3162.26 3165.52 3166.15 3167.39 3174.94 3175.20  
3180.55 3180.65 3182.58 3183.01 3183.86 3188.22  
3190.03 3191.42 3192.36 3193.09 3193.57 3197.77  
3206.54 3206.90 3208.26 3214.13 3215.48 3217.57  
3221.11 3222.74 3232.87

=====  
15B-TS1"  
=====

-314.32 8.72 17.25 22.20 24.47 26.71  
30.02 34.20 36.44 40.07 41.75 43.07  
46.08 50.57 51.13 52.22 53.19 56.34  
57.97 63.51 66.15 71.43 75.57 76.71  
81.62 88.65 90.88 99.22 99.87 103.00  
106.58 106.99 111.34 113.86 118.23 123.16  
136.55 141.37 143.39 149.61 154.12 155.29  
159.24 164.83 173.51 175.25 182.53 183.71  
186.12 189.56 196.99 198.25 200.48 202.80  
210.59 217.55 219.38 221.06 227.02 230.67  
234.91 239.57 243.62 247.05 253.14 255.53  
256.28 267.48 269.01 271.93 279.03 283.26  
288.35 291.14 293.41 300.26 306.65 307.75  
323.31 326.82 333.09 342.76 395.88 398.31  
399.24 412.73 417.36 430.45 445.17 445.86  
448.61 458.58 463.50 480.79 485.79 492.05  
493.07 499.52 514.93 517.59 520.26 520.99  
522.94 524.68 526.00 528.19 530.83 532.70  
534.66 537.57 537.96 545.04 547.51 553.30  
556.25 557.07 558.56 563.25 567.13 568.70  
570.22 575.47 579.31 598.24 618.20 620.34  
623.55 633.61 650.94 657.18 674.04 684.58  
690.77 703.93 704.98 710.49 713.60 716.63  
762.73 765.31 768.49 775.42 789.05 791.61

804.24 813.96 828.73 839.21 840.37 846.01  
856.04 862.47 864.22 865.19 871.55 871.85  
875.86 877.12 879.28 881.28 884.66 888.08  
894.79 897.10 903.36 906.47 906.89 922.48  
926.95 930.78 933.41 936.67 948.99 950.85  
952.80 957.94 962.16 962.58 965.18 965.71  
969.07 972.58 976.00 987.98 991.97 1002.04  
1002.54 1002.87 1006.51 1009.68 1011.96 1012.82  
1013.97 1023.36 1023.69 1025.05 1026.10 1026.51  
1038.72 1042.21 1047.17 1048.88 1049.52 1055.89  
1057.82 1063.73 1064.75 1066.07 1066.48 1066.73  
1067.04 1067.63 1069.15 1070.39 1077.21 1094.36  
1122.18 1131.93 1136.34 1139.69 1155.18 1157.49  
1162.38 1165.28 1167.17 1168.02 1173.73 1173.78  
1175.89 1188.20 1193.23 1199.42 1203.92 1204.22  
1204.32 1205.83 1207.20 1210.40 1212.33 1214.48  
1227.72 1244.19 1255.73 1259.11 1262.23 1276.58  
1288.69 1290.85 1290.89 1292.60 1295.04 1301.29  
1312.63 1317.19 1320.28 1321.51 1324.92 1330.64  
1333.28 1347.77 1351.14 1354.07 1358.14 1361.05  
1362.11 1364.25 1367.52 1388.51 1396.50 1408.58  
1409.88 1412.52 1425.22 1425.70 1428.34 1429.71  
1429.95 1430.14 1431.29 1432.73 1433.13 1433.51  
1452.64 1459.68 1461.63 1462.98 1463.97 1464.90  
1465.10 1466.39 1466.52 1467.06 1478.86 1488.60  
1491.42 1494.52 1496.21 1497.19 1498.68 1499.05  
1500.04 1500.86 1501.42 1502.81 1503.03 1503.55  
1504.43 1505.17 1506.90 1510.05 1511.01 1512.58  
1513.04 1514.04 1519.42 1521.29 1521.43 1522.44  
1524.39 1528.80 1548.58 1551.32 1596.81 1602.73  
1635.22 1636.55 1637.03 1637.74 1637.96 1639.14  
1648.29 1649.34 1650.39 1650.82 1651.28 1671.50  
1672.58 1776.73 1844.66 2979.62 2992.88 3002.25  
3036.37 3039.09 3039.64 3041.03 3041.30 3041.82  
3043.90 3045.33 3046.04 3050.42 3066.16 3075.48  
3096.29 3096.66 3100.81 3101.16 3101.71 3102.84  
3106.12 3111.01 3112.66 3114.88 3116.74 3120.51  
3122.14 3122.97 3125.07 3125.64 3126.25 3127.55  
3128.60 3132.55 3135.74 3136.01 3147.33 3148.11  
3164.87 3167.75 3168.57 3175.00 3178.30 3179.26  
3181.16 3183.06 3185.33 3187.46 3188.15 3191.62  
3191.76 3193.45 3194.06 3194.76 3196.09 3199.86  
3200.95 3201.63 3205.40 3206.28 3215.92 3216.61  
3224.61 3229.35 3232.52
